# Supplementary material for: Effects of Acute and Chronic Gabapentin Treatment on Cardiovascular Function of Rats
Source: Preprints.org preprint supplement (doi:10.20944/preprints202310.0903.v1), 2023-10-13
Supplement: Supplementary file 3 [file supplementary]

## Sheet: Proteins
Accession	Description	# Peptides	Abundance Ratio: (126) / (131C)	Abundance Ratio: (127N) / (131C)	Abundance Ratio: (127C) / (131C)	Abundance Ratio: (128N) / (131C)	Abundance Ratio: (128C) / (131C)	Abundance Ratio: (129N) / (131C)	Abundance Ratio: (129C) / (131C)	Abundance Ratio: (130N) / (131C)	Abundance Ratio: (130C) / (131C)	Abundance Ratio: (131N) / (131C)	Abundance Ratio (log2): (126) / (131C)	Abundance Ratio (log2): (127N) / (131C)	Abundance Ratio (log2): (127C) / (131C)	Abundance Ratio (log2): (128N) / (131C)	Abundance Ratio (log2): (128C) / (131C)	Abundance Ratio (log2): (129N) / (131C)	Abundance Ratio (log2): (129C) / (131C)	Abundance Ratio (log2): (130N) / (131C)	Abundance Ratio (log2): (130C) / (131C)	Abundance Ratio (log2): (131N) / (131C)
A0A8I5ZUN3	Titin OS=Rattus norvegicus OX=10116 GN=Ttn PE=1 SV=1	1531	1.499	0.772	1.324	1.211	0.863	0.748	0.82	0.896	0.959	1.014	0.58	-0.37	0.4	0.28	-0.21	-0.42	-0.29	-0.16	-0.06	0.02
A0A8I5ZU83	Titin OS=Rattus norvegicus OX=10116 GN=Ttn PE=1 SV=1	1467	1.427	0.746	1.322	1.211	0.869	0.625	0.799	0.845	0.99	1.088	0.51	-0.42	0.4	0.28	-0.2	-0.68	-0.32	-0.24	-0.01	0.12
G3V885	Myosin heavy chain 6 OS=Rattus norvegicus OX=10116 GN=Myh6 PE=1 SV=2	178	2.826	1.435	1.283	1.227	0.952	0.812	0.622	0.731	0.653	0.626	1.5	0.52	0.36	0.29	-0.07	-0.3	-0.69	-0.45	-0.61	-0.68
G3V8B0	Myosin heavy chain 7 OS=Rattus norvegicus OX=10116 GN=Myh7 PE=1 SV=1	162	3.636	0.986	1.383	1.177	0.928	0.643	0.585	0.604	0.63	0.59	1.86	-0.02	0.47	0.24	-0.11	-0.64	-0.77	-0.73	-0.67	-0.76
A0A0G2JUA5	AHNAK nucleoprotein OS=Rattus norvegicus OX=10116 GN=Ahnak PE=1 SV=1	210	0.941	1.048	0.96	1.003	1.041	1.175	1.013	1.023	1.007	0.998	-0.09	0.07	-0.06	0.01	0.06	0.23	0.02	0.03	0.01	0
F1LRZ1	Ryanodine receptor 2 OS=Rattus norvegicus OX=10116 GN=Ryr2 PE=1 SV=4	212	0.875	0.823	1.015	0.855	1.011	0.727	1.069	0.997	1.087	1.142	-0.19	-0.28	0.02	-0.23	0.02	-0.46	0.1	0	0.12	0.19
A0A0G2JU96	AHNAK nucleoprotein OS=Rattus norvegicus OX=10116 GN=Ahnak PE=1 SV=2	204	0.936	0.989	0.965	1.07	1.119	1.203	1.084	1.107	1.043	1.384	-0.1	-0.02	-0.05	0.1	0.16	0.27	0.12	0.15	0.06	0.47
A0A8I6A794	Titin OS=Rattus norvegicus OX=10116 GN=Ttn PE=1 SV=1	225	1.16	1.043	1.049	1.037	1.029	0.849	1.005	1.018	1.072	1.07	0.21	0.06	0.07	0.05	0.04	-0.24	0.01	0.03	0.1	0.1
A0A0G2JTH0	Spectrin, alpha, non-erythrocytic 1 OS=Rattus norvegicus OX=10116 GN=Sptan1 PE=1 SV=1	162	0.987	0.997	1.041	0.963	0.987	0.966	1.025	1.025	1.018	1	-0.02	0	0.06	-0.05	-0.02	-0.05	0.04	0.04	0.03	0
Q6IRK8	Spna2 protein OS=Rattus norvegicus OX=10116 GN=Sptan1 PE=1 SV=1	159	0.864	1.278	0.916	0.914	0.957	1.635	0.948	1.048	0.998	0.93	-0.21	0.35	-0.13	-0.13	-0.06	0.71	-0.08	0.07	0	-0.1
A0A0G2K5T2	Plectin OS=Rattus norvegicus OX=10116 GN=Plec PE=1 SV=1	219	1.222	0.918	1.117	1.082	0.965	0.895	0.96	0.976	1.019	1	0.29	-0.12	0.16	0.11	-0.05	-0.16	-0.06	-0.04	0.03	0
P11530	Dystrophin OS=Rattus norvegicus OX=10116 GN=Dmd PE=1 SV=2	171	0.991	0.886	1.044	0.95	1.038	0.783	1.023	1.037	1.064	1.091	-0.01	-0.17	0.06	-0.07	0.05	-0.35	0.03	0.05	0.09	0.13
D4A678	Spectrin, alpha, erythrocytic 1 OS=Rattus norvegicus OX=10116 GN=Spta1 PE=1 SV=4	137	0.81	1.772	0.726	1.082	0.728	1.891	0.972	1.159	1.092	0.676	-0.3	0.83	-0.46	0.11	-0.46	0.92	-0.04	0.21	0.13	-0.56
M0R9X8	Dynein cytoplasmic 1 heavy chain 1 OS=Rattus norvegicus OX=10116 GN=Dync1h1 PE=1 SV=3	178	0.935	1.027	0.963	0.902	1.005	1.028	1.018	1.012	1.053	1.038	-0.1	0.04	-0.05	-0.15	0.01	0.04	0.03	0.02	0.07	0.05
Q6XD99	Spectrin beta chain OS=Rattus norvegicus OX=10116 GN=Sptbn1 PE=2 SV=1	142	1.091	1	1.054	1.011	0.991	0.947	0.986	1	0.984	0.992	0.13	0	0.08	0.02	-0.01	-0.08	-0.02	0	-0.02	-0.01
A0A0G2JZY6	Spectrin beta chain OS=Rattus norvegicus OX=10116 GN=Sptbn1 PE=1 SV=2	136	1.06	0.931	1.055	1.007	1.02	0.843	1.068	1.097	1.008	0.973	0.08	-0.1	0.08	0.01	0.03	-0.25	0.09	0.13	0.01	-0.04
G3V6D3	ATP synthase subunit beta OS=Rattus norvegicus OX=10116 GN=Atp5f1b PE=1 SV=1	46	0.902	0.763	0.971	0.991	1.1	0.763	1.055	0.967	1.011	1.022	-0.15	-0.39	-0.04	-0.01	0.14	-0.39	0.08	-0.05	0.02	0.03
M0RBJ7	Complement C3 OS=Rattus norvegicus OX=10116 GN=C3 PE=1 SV=2	103	0.874	1.447	0.788	0.958	0.853	1.859	0.936	1.046	0.988	0.759	-0.19	0.53	-0.34	-0.06	-0.23	0.89	-0.1	0.06	-0.02	-0.4
D3ZHA0	Filamin-C OS=Rattus norvegicus OX=10116 GN=Flnc PE=1 SV=1	129	1.14	0.9	1.094	1.024	0.984	0.921	0.952	0.913	0.995	1.052	0.19	-0.15	0.13	0.03	-0.02	-0.12	-0.07	-0.13	-0.01	0.07
A0A8I6AC90	Myomesin 2 OS=Rattus norvegicus OX=10116 GN=Myom2 PE=1 SV=1	96	1.03	0.738	1.173	0.994	0.997	0.635	1.076	0.999	1.011	1.097	0.04	-0.44	0.23	-0.01	-0.01	-0.65	0.11	0	0.02	0.13
A0A8L2QDW2	Calcium-transporting ATPase OS=Rattus norvegicus OX=10116 GN=Atp2a2 PE=1 SV=1	67	0.882	0.864	1.042	0.93	1.002	0.784	1.058	0.996	1.042	1.115	-0.18	-0.21	0.06	-0.11	0	-0.35	0.08	-0.01	0.06	0.16
A0A8I6ABG6	Talin 1 OS=Rattus norvegicus OX=10116 GN=Tln1 PE=1 SV=1	116	0.862	1.217	0.88	0.93	0.942	1.772	0.945	0.979	0.926	0.895	-0.21	0.28	-0.18	-0.11	-0.09	0.83	-0.08	-0.03	-0.11	-0.16
A0A8I6AWM3	Spectrin beta chain OS=Rattus norvegicus OX=10116 GN=Sptb PE=1 SV=1	127	0.822	1.842	0.723	1.095	0.723	1.918	0.935	1.12	1.05	0.668	-0.28	0.88	-0.47	0.13	-0.47	0.94	-0.1	0.16	0.07	-0.58
A0A8L2Q868	Myosin binding protein C3 OS=Rattus norvegicus OX=10116 GN=Mybpc3 PE=4 SV=1	80	1.277	0.789	1.118	1.098	1.001	0.699	0.929	1.03	1.015	1.017	0.35	-0.34	0.16	0.13	0	-0.52	-0.11	0.04	0.02	0.02
A0A8I5ZV49	Filamin A OS=Rattus norvegicus OX=10116 GN=Flna PE=1 SV=1	112	0.791	1.24	0.723	0.824	0.767	3.794	0.818	1.044	0.807	0.745	-0.34	0.31	-0.47	-0.28	-0.38	1.92	-0.29	0.06	-0.31	-0.43
A0A8I6GBP8	Myomesin 1 OS=Rattus norvegicus OX=10116 GN=Myom1 PE=1 SV=1	106	1.062	0.759	1.111	0.999	0.971	0.667	1.097	1.047	1.057	1.084	0.09	-0.4	0.15	0	-0.04	-0.59	0.13	0.07	0.08	0.12
A0A0G2K8V2	Vinculin OS=Rattus norvegicus OX=10116 GN=Vcl PE=1 SV=2	76	0.978	1.153	1.003	1.006	1.009	1.388	0.985	1.019	0.935	0.926	-0.03	0.21	0	0.01	0.01	0.47	-0.02	0.03	-0.1	-0.11
P15999	ATP synthase subunit alpha, mitochondrial OS=Rattus norvegicus OX=10116 GN=Atp5f1a PE=1 SV=2	61	0.895	0.78	1.008	0.986	1.096	0.658	1.087	1.021	1.045	1.07	-0.16	-0.36	0.01	-0.02	0.13	-0.6	0.12	0.03	0.06	0.1
M0R9L0	Nascent polypeptide associated complex subunit alpha OS=Rattus norvegicus OX=10116 GN=Naca PE=1 SV=1	81	0.972	1.036	0.987	1.003	1.054	0.844	1.018	1.086	1.012	1.028	-0.04	0.05	-0.02	0	0.08	-0.24	0.03	0.12	0.02	0.04
Q0QEP3	ATP synthase subunit beta (Fragment) OS=Rattus norvegicus OX=10116 GN=ATP5B PE=2 SV=1	32	1.098	1.029	1.003	1.13	1.18	0.772	1.192	1.199	1.295	1.053	0.14	0.04	0	0.18	0.24	-0.37	0.25	0.26	0.37	0.07
P11442	Clathrin heavy chain 1 OS=Rattus norvegicus OX=10116 GN=Cltc PE=1 SV=3	81	0.83	1.022	0.947	0.885	0.952	1.155	1.023	1.01	1.047	1.036	-0.27	0.03	-0.08	-0.18	-0.07	0.21	0.03	0.01	0.07	0.05
A0A8I6ADR1	Collagen type VI alpha 3 chain OS=Rattus norvegicus OX=10116 GN=Col6a3 PE=1 SV=1	85	1.116	0.985	1.137	1.065	0.993	1.077	0.814	0.983	0.925	0.947	0.16	-0.02	0.18	0.09	-0.01	0.11	-0.3	-0.03	-0.11	-0.08
A0A8I6AQG5	proton-translocating NAD(P)(+) transhydrogenase OS=Rattus norvegicus OX=10116 GN=Nnt PE=1 SV=1	58	0.835	0.648	1.111	0.978	1.015	0.592	1.095	0.96	1.031	1.11	-0.26	-0.63	0.15	-0.03	0.02	-0.76	0.13	-0.06	0.04	0.15
Q9ER34	Aconitate hydratase, mitochondrial OS=Rattus norvegicus OX=10116 GN=Aco2 PE=1 SV=2	51	0.902	0.762	1.03	1.008	1.046	0.771	1.06	0.956	1.006	1.056	-0.15	-0.39	0.04	0.01	0.07	-0.38	0.08	-0.06	0.01	0.08
Q5XI78	2-oxoglutarate dehydrogenase complex component E1 OS=Rattus norvegicus OX=10116 GN=Ogdh PE=1 SV=1	59	0.882	0.655	1.097	0.971	1.012	0.745	1.089	0.919	1.015	1.197	-0.18	-0.61	0.13	-0.04	0.02	-0.42	0.12	-0.12	0.02	0.26
A0A8I5ZN92	Actinin alpha 2 OS=Rattus norvegicus OX=10116 GN=Actn2 PE=1 SV=1	61	1.202	1.03	0.8	0.847	0.777	0.783	0.955	1.059	1.138	1.185	0.27	0.04	-0.32	-0.24	-0.36	-0.35	-0.07	0.08	0.19	0.25
F1LMV6	Desmoplakin OS=Rattus norvegicus OX=10116 GN=Dsp PE=1 SV=1	116	1.576	0.86	1.309	1.214	0.992	0.693	0.88	0.911	0.892	0.891	0.66	-0.22	0.39	0.28	-0.01	-0.53	-0.18	-0.14	-0.17	-0.17
D4A3B0	Talin 2 OS=Rattus norvegicus OX=10116 GN=Tln2 PE=1 SV=4	96	1.02	0.951	1.06	1.013	1.042	0.853	0.993	1.032	0.986	0.998	0.03	-0.07	0.08	0.02	0.06	-0.23	-0.01	0.05	-0.02	0
A0A0G2JSH5	Albumin OS=Rattus norvegicus OX=10116 GN=Alb PE=1 SV=1	61	0.767	1.201	0.853	0.881	0.838	2.089	0.926	1.061	0.992	0.86	-0.38	0.26	-0.23	-0.18	-0.25	1.06	-0.11	0.08	-0.01	-0.22
Q64428	Trifunctional enzyme subunit alpha, mitochondrial OS=Rattus norvegicus OX=10116 GN=Hadha PE=1 SV=2	48	0.841	0.698	1.04	0.986	1.055	0.696	1.079	0.99	1.027	1.063	-0.25	-0.52	0.06	-0.02	0.08	-0.52	0.11	-0.01	0.04	0.09
P63039	60 kDa heat shock protein, mitochondrial OS=Rattus norvegicus OX=10116 GN=Hspd1 PE=1 SV=1	43	0.965	0.904	1.015	1.044	1.082	0.89	1.054	1.009	1.008	1.03	-0.05	-0.15	0.02	0.06	0.11	-0.17	0.08	0.01	0.01	0.04
A0A8L2Q3W7	Pregnancy-zone protein OS=Rattus norvegicus OX=10116 GN=Pzp PE=1 SV=1	65	0.816	1.449	0.757	0.979	0.812	1.895	0.938	1.139	1.005	0.721	-0.29	0.54	-0.4	-0.03	-0.3	0.92	-0.09	0.19	0.01	-0.47
Q03626	Murinoglobulin-1 OS=Rattus norvegicus OX=10116 GN=Mug1 PE=2 SV=1	58	0.787	1.269	0.774	0.895	0.8	2.172	0.954	1.026	0.992	0.75	-0.35	0.34	-0.37	-0.16	-0.32	1.12	-0.07	0.04	-0.01	-0.42
P14046	Alpha-1-inhibitor 3 OS=Rattus norvegicus OX=10116 GN=A1i3 PE=1 SV=1	59	0.841	1.438	0.797	0.93	0.849	1.9	0.987	1.068	0.999	0.768	-0.25	0.52	-0.33	-0.1	-0.24	0.93	-0.02	0.1	0	-0.38
A0A0G2JUP3	non-specific serine/threonine protein kinase OS=Rattus norvegicus OX=10116 GN=Obscn PE=1 SV=2	113	1.171	0.867	1.163	1.039	0.915	0.828	0.941	0.952	1.05	1.069	0.23	-0.21	0.22	0.06	-0.13	-0.27	-0.09	-0.07	0.07	0.1
Q6P9Y4	ADP/ATP translocase OS=Rattus norvegicus OX=10116 GN=Slc25a4 PE=1 SV=1	45	0.644	0.558	0.955	0.679	1.034	0.527	0.957	0.882	1.024	1.113	-0.64	-0.84	-0.07	-0.56	0.05	-0.92	-0.06	-0.18	0.03	0.15
Q66HF1	NADH-ubiquinone oxidoreductase 75 kDa subunit, mitochondrial OS=Rattus norvegicus OX=10116 GN=Ndufs1 PE=1 SV=1	47	0.94	0.751	1.052	0.958	1.037	0.68	1.067	0.979	1.016	1.096	-0.09	-0.41	0.07	-0.06	0.05	-0.56	0.09	-0.03	0.02	0.13
A0A8I6A2S5	Heparan sulfate proteoglycan 2 OS=Rattus norvegicus OX=10116 GN=Hspg2 PE=1 SV=1	77	1.135	0.971	1.081	1.059	1.014	1.045	0.93	0.959	0.94	0.931	0.18	-0.04	0.11	0.08	0.02	0.06	-0.1	-0.06	-0.09	-0.1
G3V8V3	Alpha-1,4 glucan phosphorylase OS=Rattus norvegicus OX=10116 GN=Pygm PE=1 SV=1	65	0.828	0.888	1.022	0.99	1.034	0.776	1.064	1.02	0.993	1.035	-0.27	-0.17	0.03	-0.02	0.05	-0.37	0.09	0.03	-0.01	0.05
A0A8I6ARF4	Actinin alpha 2 OS=Rattus norvegicus OX=10116 GN=Actn2 PE=1 SV=1	56	1.23	1.251	0.796	1.01	0.84	0.953	0.97	1.081	1.05	0.941	0.3	0.32	-0.33	0.01	-0.25	-0.07	-0.04	0.11	0.07	-0.09
F1M953	Stress-70 protein, mitochondrial OS=Rattus norvegicus OX=10116 GN=Hspa9 PE=1 SV=1	51	0.909	0.784	1.074	1.012	1.039	0.81	1.051	0.964	1.014	1.098	-0.14	-0.35	0.1	0.02	0.05	-0.3	0.07	-0.05	0.02	0.13
A0A0G2K6S9	Myosin heavy chain 11 OS=Rattus norvegicus OX=10116 GN=Myh11 PE=1 SV=2	85	0.504	0.924	0.779	0.962	1.022	2.785	1.116	0.895	0.518	0.792	-0.99	-0.11	-0.36	-0.06	0.03	1.48	0.16	-0.16	-0.95	-0.34
E9PTU4	Myosin heavy chain 11 OS=Rattus norvegicus OX=10116 GN=Myh11 PE=1 SV=3	85	0.835	1.268	0.714	0.828	0.781	4.579	0.712	0.948	0.693	0.656	-0.26	0.34	-0.49	-0.27	-0.36	2.2	-0.49	-0.08	-0.53	-0.61
A0A0G2JWS2	Nebulette OS=Rattus norvegicus OX=10116 GN=Nebl PE=1 SV=2	62	1.071	0.822	1.106	1.013	1.055	0.669	1.067	1.002	1.075	1.098	0.1	-0.28	0.15	0.02	0.08	-0.58	0.09	0	0.1	0.13
P62738	Actin, aortic smooth muscle OS=Rattus norvegicus OX=10116 GN=Acta2 PE=2 SV=1	31	2.02	1.536	0.964	0.984	0.987	1.02	0.759	0.837	0.774	0.731	1.01	0.62	-0.05	-0.02	-0.02	0.03	-0.4	-0.26	-0.37	-0.45
P06685	Sodium/potassium-transporting ATPase subunit alpha-1 OS=Rattus norvegicus OX=10116 GN=Atp1a1 PE=1 SV=1	54	0.926	0.87	1.061	1.008	1.029	0.802	1.07	1.025	1.034	1.089	-0.11	-0.2	0.09	0.01	0.04	-0.32	0.1	0.04	0.05	0.12
A0A0G2JWX2	Laminin subunit alpha 2 OS=Rattus norvegicus OX=10116 GN=Lama2 PE=1 SV=1	85	1.2	1.074	1.245	1.184	1.093	0.787	0.895	0.952	0.87	0.959	0.26	0.1	0.32	0.24	0.13	-0.35	-0.16	-0.07	-0.2	-0.06
A0A8J8XU90	Myosin, heavy chain 9 OS=Rattus norvegicus OX=10116 GN=Myh9 PE=1 SV=1	82	1	1.367	0.993	0.961	1.027	1.721	0.85	0.958	0.987	0.958	0	0.45	-0.01	-0.06	0.04	0.78	-0.23	-0.06	-0.02	-0.06
P63018	Heat shock cognate 71 kDa protein OS=Rattus norvegicus OX=10116 GN=Hspa8 PE=1 SV=1	52	0.995	1.065	0.989	1.041	1.022	0.997	1.036	1.027	1.007	0.988	-0.01	0.09	-0.02	0.06	0.03	0	0.05	0.04	0.01	-0.02
F1LMU0	Myosin heavy chain 4 OS=Rattus norvegicus OX=10116 GN=Myh4 PE=1 SV=1	46	3.838	1.813	1.588	1.357	0.904	0.925	0.462	0.638	0.419	0.529	1.94	0.86	0.67	0.44	-0.15	-0.11	-1.11	-0.65	-1.25	-0.92
Q5M9H2	Acyl-CoA dehydrogenase, very long chain OS=Rattus norvegicus OX=10116 GN=Acadvl PE=1 SV=1	46	0.925	0.753	1.006	1.04	1.097	0.761	1.046	0.995	1.01	1.051	-0.11	-0.41	0.01	0.06	0.13	-0.39	0.07	-0.01	0.01	0.07
A0A8I6AVL2	Acyl-CoA dehydrogenase family, member 10 OS=Rattus norvegicus OX=10116 GN=Acad10 PE=1 SV=1	60	0.886	0.7	1.01	0.986	1.028	0.791	1.046	0.943	1.003	1.084	-0.17	-0.51	0.01	-0.02	0.04	-0.34	0.06	-0.09	0	0.12
G3V9U2	Acetyl-CoA acyltransferase 2 OS=Rattus norvegicus OX=10116 GN=Acaa2 PE=1 SV=3	31	0.925	0.744	1.029	1.015	1.104	0.76	1.093	1.045	1.057	1.061	-0.11	-0.43	0.04	0.02	0.14	-0.4	0.13	0.06	0.08	0.09
P08649	Complement C4 OS=Rattus norvegicus OX=10116 GN=C4 PE=1 SV=3	62	0.888	1.367	0.786	0.964	0.858	1.698	0.928	1.018	0.973	0.773	-0.17	0.45	-0.35	-0.05	-0.22	0.76	-0.11	0.03	-0.04	-0.37
A0A0G2JVH4	MICOS complex subunit MIC60 OS=Rattus norvegicus OX=10116 GN=Immt PE=1 SV=2	48	0.937	0.755	1.075	0.972	1.03	0.68	1.079	1.023	1.047	1.093	-0.09	-0.41	0.1	-0.04	0.04	-0.56	0.11	0.03	0.07	0.13
P42123	L-lactate dehydrogenase B chain OS=Rattus norvegicus OX=10116 GN=Ldhb PE=1 SV=2	31	0.914	0.622	1.032	0.979	1.086	0.6	1.049	0.917	0.992	1.09	-0.13	-0.69	0.05	-0.03	0.12	-0.74	0.07	-0.13	-0.01	0.12
G3V6E1	Myosin heavy chain 2 OS=Rattus norvegicus OX=10116 GN=Myh2 PE=1 SV=4	43	4.168	1.753	1.344	1.454	1.121	0.714	0.518	0.755	0.603	0.44	2.06	0.81	0.43	0.54	0.17	-0.49	-0.95	-0.41	-0.73	-1.18
A0A8I6GAS7	Ankyrin 1 OS=Rattus norvegicus OX=10116 GN=Ank1 PE=1 SV=1	63	0.923	0.963	1.22	1.243	0.847	0.575	1.588	0.671	1.205	1.027	-0.12	-0.05	0.29	0.31	-0.24	-0.8	0.67	-0.57	0.27	0.04
P46462	Transitional endoplasmic reticulum ATPase OS=Rattus norvegicus OX=10116 GN=Vcp PE=1 SV=3	49	0.944	1.077	0.981	1.051	1.019	1.074	1.041	1.019	1.026	1.005	-0.08	0.11	-0.03	0.07	0.03	0.1	0.06	0.03	0.04	0.01
A0A8I6A0H1	Ankyrin 1 OS=Rattus norvegicus OX=10116 GN=Ank1 PE=1 SV=1	63	0.766	1.705	0.724	0.93	0.804	1.586	0.945	1.105	1.099	0.72	-0.38	0.77	-0.47	-0.1	-0.31	0.67	-0.08	0.14	0.14	-0.47
A0A8I6G4G4	Annexin OS=Rattus norvegicus OX=10116 GN=Anxa6 PE=1 SV=1	54	0.931	1.122	1.042	1.034	1.083	0.941	0.904	0.974	0.927	1.003	-0.1	0.17	0.06	0.05	0.12	-0.09	-0.15	-0.04	-0.11	0
F1LWG8	Sarcalumenin OS=Rattus norvegicus OX=10116 GN=Srl PE=1 SV=3	39	0.921	0.949	1.018	0.951	1.03	0.826	1.048	1.004	1.031	1.105	-0.12	-0.07	0.03	-0.07	0.04	-0.28	0.07	0.01	0.04	0.14
Q5U302	Catenin (Cadherin associated protein), alpha 1 OS=Rattus norvegicus OX=10116 GN=Ctnna1 PE=1 SV=1	44	1.083	0.99	1.062	1.019	1.051	0.788	1.019	0.964	0.955	0.966	0.11	-0.01	0.09	0.03	0.07	-0.34	0.03	-0.05	-0.07	-0.05
A0A8L2QEA3	Heat shock protein 90 alpha family class B member 1 OS=Rattus norvegicus OX=10116 GN=Hsp90ab1 PE=1 SV=1	56	0.879	1.128	1.014	0.97	1.013	1.013	1.05	0.984	1.013	1.057	-0.19	0.17	0.02	-0.04	0.02	0.02	0.07	-0.02	0.02	0.08
D4AEH9	Glycogen debranching enzyme OS=Rattus norvegicus OX=10116 GN=Agl PE=1 SV=1	64	0.914	0.92	1.041	1.009	1.035	0.798	1.057	1.04	1.033	1.084	-0.13	-0.12	0.06	0.01	0.05	-0.32	0.08	0.06	0.05	0.12
Q60587	Trifunctional enzyme subunit beta, mitochondrial OS=Rattus norvegicus OX=10116 GN=Hadhb PE=1 SV=1	33	0.795	0.653	1.033	0.962	1.059	0.712	1.063	0.955	1.011	1.087	-0.33	-0.62	0.05	-0.06	0.08	-0.49	0.09	-0.07	0.02	0.12
A0A8I6ABE3	Pyruvate kinase OS=Rattus norvegicus OX=10116 GN=Pkm PE=1 SV=1	42	0.897	0.805	1.039	0.975	1.019	0.887	1.035	0.979	1.008	1.068	-0.16	-0.31	0.06	-0.04	0.03	-0.17	0.05	-0.03	0.01	0.1
P05197	Elongation factor 2 OS=Rattus norvegicus OX=10116 GN=Eef2 PE=1 SV=4	54	0.879	0.912	1.024	0.981	0.96	1.02	1.003	0.938	0.975	1.075	-0.19	-0.13	0.03	-0.03	-0.06	0.03	0	-0.09	-0.04	0.1
G3V6Y6	Alpha-1,4 glucan phosphorylase OS=Rattus norvegicus OX=10116 GN=Pygb PE=1 SV=2	49	0.792	0.913	0.957	0.857	0.961	0.886	0.985	1.085	0.954	0.992	-0.34	-0.13	-0.06	-0.22	-0.06	-0.17	-0.02	0.12	-0.07	-0.01
A0A8I6A864	creatine kinase OS=Rattus norvegicus OX=10116 GN=Ckmt2 PE=1 SV=1	30	0.967	0.672	1.079	0.977	1.034	0.596	1.01	0.963	1.009	1.092	-0.05	-0.57	0.11	-0.03	0.05	-0.75	0.01	-0.05	0.01	0.13
A0A8L2R6L8	Long-chain-fatty-acid--CoA ligase OS=Rattus norvegicus OX=10116 GN=Acsl1 PE=1 SV=1	41	0.887	0.743	1.072	0.975	1.027	0.757	1.061	0.994	1.013	1.109	-0.17	-0.43	0.1	-0.04	0.04	-0.4	0.09	-0.01	0.02	0.15
A0A8I5ZMD4	Annexin OS=Rattus norvegicus OX=10116 GN=Anxa6 PE=1 SV=1	54	0.895	1.303	1.073	1.156	1.389	1.2	1.097	1.086	0.988	1.049	-0.16	0.38	0.1	0.21	0.47	0.26	0.13	0.12	-0.02	0.07
Q6P725	Desmin OS=Rattus norvegicus OX=10116 GN=Des PE=1 SV=1	36	1.31	1.088	1.144	1.057	0.937	0.822	0.917	1.022	0.993	0.998	0.39	0.12	0.19	0.08	-0.09	-0.28	-0.12	0.03	-0.01	0
P53534	Glycogen phosphorylase, brain form (Fragment) OS=Rattus norvegicus OX=10116 GN=Pygb PE=1 SV=3	49	0.851	0.901	1.035	1.028	1.059	0.821	1.085	1.066	1.032	1.077	-0.23	-0.15	0.05	0.04	0.08	-0.28	0.12	0.09	0.05	0.11
F1LM33	Leucine-rich pentatricopeptide repeat containing OS=Rattus norvegicus OX=10116 GN=Lrpprc PE=1 SV=3	74	0.884	0.797	1.034	0.914	1.016	0.803	1.08	1.001	1.065	1.11	-0.18	-0.33	0.05	-0.13	0.02	-0.32	0.11	0	0.09	0.15
A0A0G2K3W1	von Willebrand factor A domain containing 8 OS=Rattus norvegicus OX=10116 GN=Vwa8 PE=1 SV=2	68	0.901	0.87	0.986	0.96	1.061	0.876	1.062	1.051	1.078	1.075	-0.15	-0.2	-0.02	-0.06	0.08	-0.19	0.09	0.07	0.11	0.1
A0A1K0H3R5	Globin a4 OS=Rattus norvegicus OX=10116 GN=Hbb-b1 PE=1 SV=1	23	1.147	1.765	0.795	1.101	0.809	1.14	0.873	1.086	0.921	0.645	0.2	0.82	-0.33	0.14	-0.31	0.19	-0.2	0.12	-0.12	-0.63
A0A8I6A708	Ceruloplasmin OS=Rattus norvegicus OX=10116 GN=Cp PE=1 SV=1	45	0.911	1.396	0.799	0.977	0.85	1.975	0.905	0.996	1.008	0.826	-0.13	0.48	-0.32	-0.03	-0.23	0.98	-0.14	-0.01	0.01	-0.28
P15650	Long-chain specific acyl-CoA dehydrogenase, mitochondrial OS=Rattus norvegicus OX=10116 GN=Acadl PE=1 SV=1	30	0.977	0.85	1	1.043	1.079	0.767	1.048	0.992	1.003	1.029	-0.03	-0.23	0	0.06	0.11	-0.38	0.07	-0.01	0	0.04
P68136	Actin, alpha skeletal muscle OS=Rattus norvegicus OX=10116 GN=Acta1 PE=1 SV=1	27	1.732	1.435	0.904	1.013	0.901	0.925	0.825	0.875	0.887	0.764	0.79	0.52	-0.15	0.02	-0.15	-0.11	-0.28	-0.19	-0.17	-0.39
A0A8I6G5T6	Pyruvate kinase OS=Rattus norvegicus OX=10116 GN=Pkm PE=1 SV=1	40	0.931	1.359	1.069	1.047	0.986	1.623	1.181	1.032	1.206	1.072	-0.1	0.44	0.1	0.07	-0.02	0.7	0.24	0.05	0.27	0.1
A0A0G2K3K2	Actin, beta OS=Rattus norvegicus OX=10116 GN=Actb PE=1 SV=1	30	1.17	1.409	0.843	0.938	0.954	1.532	0.868	0.924	0.898	0.787	0.23	0.49	-0.25	-0.09	-0.07	0.62	-0.2	-0.11	-0.16	-0.35
P04636	Malate dehydrogenase, mitochondrial OS=Rattus norvegicus OX=10116 GN=Mdh2 PE=1 SV=2	32	0.86	0.744	0.995	0.945	1.04	0.797	0.989	0.892	0.951	0.99	-0.22	-0.43	-0.01	-0.08	0.06	-0.33	-0.02	-0.17	-0.07	-0.01
A0A8L2QDI1	78 kDa glucose-regulated protein OS=Rattus norvegicus OX=10116 GN=Hspa5 PE=1 SV=1	43	0.978	1.306	0.945	1.023	1.005	1.243	1	1.034	0.966	0.949	-0.03	0.39	-0.08	0.03	0.01	0.31	0	0.05	-0.05	-0.08
B2GV06	Succinyl-CoA:3-ketoacid coenzyme A transferase 1, mitochondrial OS=Rattus norvegicus OX=10116 GN=Oxct1 PE=1 SV=1	29	0.926	0.81	1.051	0.968	1.004	0.798	1.031	0.913	1.003	1.102	-0.11	-0.3	0.07	-0.05	0.01	-0.33	0.04	-0.13	0	0.14
M0R557	Cardiomyopathy associated 5 OS=Rattus norvegicus OX=10116 GN=Cmya5 PE=1 SV=2	71	0.918	1.017	0.961	0.923	1.02	0.931	1.015	1.027	1.025	1.024	-0.12	0.02	-0.06	-0.11	0.03	-0.1	0.02	0.04	0.04	0.03
A0A8I6A517	Dynamin-like 120 kDa protein, mitochondrial OS=Rattus norvegicus OX=10116 GN=Opa1 PE=1 SV=1	48	0.982	0.824	0.995	0.963	1.038	0.767	1.073	1.02	1.079	1.085	-0.03	-0.28	-0.01	-0.05	0.05	-0.38	0.1	0.03	0.11	0.12
F1MAA7	Laminin subunit gamma 1 OS=Rattus norvegicus OX=10116 GN=Lamc1 PE=1 SV=1	52	1.23	1.01	1.189	1.159	1.128	0.852	0.948	0.921	0.914	0.934	0.3	0.01	0.25	0.21	0.17	-0.23	-0.08	-0.12	-0.13	-0.1
Q6MG90	Complement C4B (Chido blood group) OS=Rattus norvegicus OX=10116 GN=C4b PE=1 SV=1	53	0.775	1.142	0.759	0.947	0.907	1.525	0.994	1.002	0.966	0.847	-0.37	0.19	-0.4	-0.08	-0.14	0.61	-0.01	0	-0.05	-0.24
G3V8L3	Lamin A, isoform CRA_b OS=Rattus norvegicus OX=10116 GN=Lmna PE=1 SV=1	46	1.036	1.063	1.01	1.018	0.918	1.363	1.01	1.108	1.009	0.968	0.05	0.09	0.01	0.03	-0.12	0.45	0.01	0.15	0.01	-0.05
P23562	Band 3 anion transport protein OS=Rattus norvegicus OX=10116 GN=Slc4a1 PE=1 SV=3	40	0.643	2.037	0.644	0.992	0.699	1.685	0.935	1.075	1.086	0.597	-0.64	1.03	-0.64	-0.01	-0.52	0.75	-0.1	0.1	0.12	-0.74
A0A8L2Q9A7	Succinate dehydrogenase [ubiquinone] flavoprotein subunit, mitochondrial OS=Rattus norvegicus OX=10116 GN=Sdha PE=1 SV=1	32	0.96	0.755	1.111	0.982	1.026	0.827	1.043	0.953	1.017	1.09	-0.06	-0.41	0.15	-0.03	0.04	-0.27	0.06	-0.07	0.02	0.12
Q09073	ADP/ATP translocase 2 OS=Rattus norvegicus OX=10116 GN=Slc25a5 PE=1 SV=3	32	0.701	0.718	0.977	0.701	1.011	0.717	1.003	0.895	1.068	1.125	-0.51	-0.48	-0.03	-0.51	0.02	-0.48	0	-0.16	0.1	0.17
A0A8I6AFH7	Sorbin and SH3 domain containing 1 OS=Rattus norvegicus OX=10116 GN=Sorbs1 PE=1 SV=1	54	1.136	0.861	1.125	1.038	1.042	0.785	1.027	1.042	0.97	0.977	0.18	-0.22	0.17	0.05	0.06	-0.35	0.04	0.06	-0.04	-0.03
Q9QZ76	Myoglobin OS=Rattus norvegicus OX=10116 GN=Mb PE=1 SV=3	24	0.855	0.64	1.012	0.961	1.061	0.649	1.096	0.942	0.997	1.075	-0.23	-0.64	0.02	-0.06	0.09	-0.62	0.13	-0.09	0	0.1
P04797	Glyceraldehyde-3-phosphate dehydrogenase OS=Rattus norvegicus OX=10116 GN=Gapdh PE=1 SV=3	28	0.878	0.919	0.969	0.983	1.021	0.864	1.037	0.959	0.976	1.036	-0.19	-0.12	-0.05	-0.02	0.03	-0.21	0.05	-0.06	-0.03	0.05
P04692	Tropomyosin alpha-1 chain OS=Rattus norvegicus OX=10116 GN=Tpm1 PE=1 SV=3	38	1.337	0.899	1.323	0.913	1.152	0.513	0.898	0.847	0.996	1.114	0.42	-0.15	0.4	-0.13	0.2	-0.96	-0.16	-0.24	-0.01	0.16
P16617	Phosphoglycerate kinase 1 OS=Rattus norvegicus OX=10116 GN=Pgk1 PE=1 SV=2	34	1.019	0.949	1.002	1.054	1.048	0.865	1.021	0.993	0.984	0.972	0.03	-0.08	0	0.08	0.07	-0.21	0.03	-0.01	-0.02	-0.04
G3V7J0	Aldehyde dehydrogenase 6 family, member A1 OS=Rattus norvegicus OX=10116 GN=Aldh6a1 PE=1 SV=1	32	0.962	0.879	0.991	1.031	1.024	0.81	1.057	1.027	0.991	1.018	-0.06	-0.19	-0.01	0.04	0.03	-0.3	0.08	0.04	-0.01	0.03
A0A0G2K7B6	Dysferlin OS=Rattus norvegicus OX=10116 GN=Dysf PE=1 SV=1	64	0.893	0.933	0.922	0.968	1.034	0.777	1.048	1.028	1.059	1.012	-0.16	-0.1	-0.12	-0.05	0.05	-0.36	0.07	0.04	0.08	0.02
A0A0G2JUW7	Murinoglobulin 2 OS=Rattus norvegicus OX=10116 GN=Mug2 PE=1 SV=2	37	1.492	2.094	0.704	1.013	0.861	1.749	0.928	1.15	1.068	0.57	0.58	1.07	-0.51	0.02	-0.22	0.81	-0.11	0.2	0.09	-0.81
G3V6D8	Myosin heavy chain 3 OS=Rattus norvegicus OX=10116 GN=Myh3 PE=1 SV=1	38	1.695	1.059	1.271	1.169	0.908	0.881	1.055	0.915	1.005	0.87	0.76	0.08	0.35	0.23	-0.14	-0.18	0.08	-0.13	0.01	-0.2
A0A0G2KBC7	ATP-dependent 6-phosphofructokinase OS=Rattus norvegicus OX=10116 GN=Pfkm PE=1 SV=1	36	0.879	1.037	0.989	0.953	0.972	0.892	1.041	1.056	1.03	1.027	-0.19	0.05	-0.02	-0.07	-0.04	-0.16	0.06	0.08	0.04	0.04
P14408	Fumarate hydratase, mitochondrial OS=Rattus norvegicus OX=10116 GN=Fh PE=1 SV=2	25	0.945	0.888	0.973	1.039	1.074	0.826	1.041	0.996	1.005	1.012	-0.08	-0.17	-0.04	0.05	0.1	-0.28	0.06	-0.01	0.01	0.02
Q5U300	Ubiquitin-like modifier-activating enzyme 1 OS=Rattus norvegicus OX=10116 GN=Uba1 PE=1 SV=1	40	0.893	1.053	0.949	1.023	1.016	1.142	1.018	1.001	1.001	0.991	-0.16	0.07	-0.08	0.03	0.02	0.19	0.03	0	0	-0.01
Q7TMC7	Signal recognition particle receptor subunit beta OS=Rattus norvegicus OX=10116 GN=Tf PE=1 SV=1	42	0.874	1.384	0.839	0.937	0.814	2.45	0.876	1.147	0.928	0.779	-0.19	0.47	-0.25	-0.09	-0.3	1.29	-0.19	0.2	-0.11	-0.36
P56574	Isocitrate dehydrogenase [NADP], mitochondrial OS=Rattus norvegicus OX=10116 GN=Idh2 PE=1 SV=2	35	0.85	0.675	1.118	1.024	1.061	0.674	1.105	0.997	1.039	1.214	-0.23	-0.57	0.16	0.03	0.08	-0.57	0.14	0	0.05	0.28
A0A8I5ZLQ4	Mitochondrial proton/calcium exchanger protein OS=Rattus norvegicus OX=10116 GN=Letm1 PE=1 SV=1	38	1.098	1.223	0.969	1.069	1.043	0.877	1.033	1.058	1.016	0.949	0.13	0.29	-0.04	0.1	0.06	-0.19	0.05	0.08	0.02	-0.08
O88600	Heat shock 70 kDa protein 4 OS=Rattus norvegicus OX=10116 GN=Hspa4 PE=1 SV=1	48	0.855	1.076	0.956	0.977	0.951	1.382	1.022	1	0.989	1.03	-0.23	0.11	-0.06	-0.03	-0.07	0.47	0.03	0	-0.02	0.04
Q9QXQ0	Alpha-actinin-4 OS=Rattus norvegicus OX=10116 GN=Actn4 PE=1 SV=2	49	1.022	1.459	0.8	0.904	0.8	1.937	0.945	1.111	0.949	0.941	0.03	0.54	-0.32	-0.15	-0.32	0.95	-0.08	0.15	-0.08	-0.09
P82995	Heat shock protein HSP 90-alpha OS=Rattus norvegicus OX=10116 GN=Hsp90aa1 PE=1 SV=3	44	0.891	1.138	0.978	0.972	0.985	1.232	1.019	0.957	1.025	1.025	-0.17	0.19	-0.03	-0.04	-0.02	0.3	0.03	-0.06	0.03	0.04
Q924S5	Lon protease homolog, mitochondrial OS=Rattus norvegicus OX=10116 GN=Lonp1 PE=2 SV=1	37	0.88	0.897	0.994	0.924	1.024	0.853	1.023	1.01	1.024	1.089	-0.18	-0.16	-0.01	-0.11	0.03	-0.23	0.03	0.01	0.03	0.12
Q6T487	Actinin, alpha 1 OS=Rattus norvegicus OX=10116 GN=Actn1 PE=1 SV=1	42	0.964	1.288	0.762	0.886	0.782	2.771	0.922	1.051	0.916	0.887	-0.05	0.37	-0.39	-0.17	-0.35	1.47	-0.12	0.07	-0.13	-0.17
P85834	Elongation factor Tu, mitochondrial OS=Rattus norvegicus OX=10116 GN=Tufm PE=1 SV=1	32	0.896	0.756	1.054	0.942	1.047	0.797	1.07	0.989	1.051	1.145	-0.16	-0.4	0.08	-0.09	0.07	-0.33	0.1	-0.02	0.07	0.2
P12346	Serotransferrin OS=Rattus norvegicus OX=10116 GN=Tf PE=1 SV=3	38	0.638	0.91	0.95	0.847	0.607	3.654	0.793	1.158	0.939	0.971	-0.65	-0.14	-0.07	-0.24	-0.72	1.87	-0.33	0.21	-0.09	-0.04
Q63080	Ca2+/Mg2+ ATPase (Fragment) OS=Rattus norvegicus OX=10116 PE=2 SV=1	25	0.929	1.204	0.973	1.022	0.867	0.933	1.043	1.081	0.942	0.973	-0.11	0.27	-0.04	0.03	-0.21	-0.1	0.06	0.11	-0.09	-0.04
Q499N5	Medium-chain acyl-CoA ligase ACSF2, mitochondrial OS=Rattus norvegicus OX=10116 GN=Acsf2 PE=2 SV=1	30	0.809	0.673	1.076	1	1.06	0.726	1.075	1.022	1.004	1.118	-0.31	-0.57	0.11	0	0.08	-0.46	0.1	0.03	0.01	0.16
A0A0G2JW88	Microtubule-associated protein OS=Rattus norvegicus OX=10116 GN=Map4 PE=1 SV=1	57	0.93	1.065	1.047	1.038	1.037	1.073	1.02	1.032	0.999	1.042	-0.1	0.09	0.07	0.05	0.05	0.1	0.03	0.04	0	0.06
D3ZZT9	Collagen type XIV alpha 1 chain OS=Rattus norvegicus OX=10116 GN=Col14a1 PE=1 SV=4	50	0.969	1.839	0.779	1.005	0.906	1.666	0.912	1.043	0.922	0.807	-0.05	0.88	-0.36	0.01	-0.14	0.74	-0.13	0.06	-0.12	-0.31
A0A8W1B2M1	Solute carrier family 25 member 12 OS=Rattus norvegicus OX=10116 GN=Slc25a12 PE=1 SV=1	37	0.782	0.669	1.101	0.901	1.009	0.581	1.083	0.974	1.076	1.187	-0.35	-0.58	0.14	-0.15	0.01	-0.78	0.11	-0.04	0.11	0.25
P00507	Aspartate aminotransferase, mitochondrial OS=Rattus norvegicus OX=10116 GN=Got2 PE=1 SV=2	36	0.9	0.649	1.082	1.069	1.081	0.643	1.054	0.974	0.995	1.12	-0.15	-0.62	0.11	0.1	0.11	-0.64	0.08	-0.04	-0.01	0.16
P06686	Sodium/potassium-transporting ATPase subunit alpha-2 OS=Rattus norvegicus OX=10116 GN=Atp1a2 PE=1 SV=1	44	0.96	0.659	1.046	1.011	1.071	0.713	1.031	1	1.029	1.077	-0.06	-0.6	0.07	0.02	0.1	-0.49	0.04	0	0.04	0.11
P18886	Carnitine O-palmitoyltransferase 2, mitochondrial OS=Rattus norvegicus OX=10116 GN=Cpt2 PE=1 SV=1	38	0.9	0.582	1.052	0.979	1.072	0.684	1.081	0.959	1.014	1.113	-0.15	-0.78	0.07	-0.03	0.1	-0.55	0.11	-0.06	0.02	0.15
A0A0G2JSW3	Hemoglobin, beta adult major chain OS=Rattus norvegicus OX=10116 GN=Hbb PE=1 SV=2	20	1.193	1.857	0.753	1.108	0.81	1.185	0.842	1.062	0.864	0.594	0.25	0.89	-0.41	0.15	-0.3	0.24	-0.25	0.09	-0.21	-0.75
A0A8I6ART9	phosphopyruvate hydratase OS=Rattus norvegicus OX=10116 GN=Eno1 PE=1 SV=1	27	0.947	0.938	1.049	0.984	1.012	0.887	0.997	0.937	0.976	1.06	-0.08	-0.09	0.07	-0.02	0.02	-0.17	0	-0.09	-0.03	0.08
A0A8I6AIQ9	Myosin-13 OS=Rattus norvegicus OX=10116 GN=Myh13 PE=1 SV=1	36	2.232	0.949	1.123	1.255	1.11	0.754	0.824	0.774	0.843	0.732	1.16	-0.08	0.17	0.33	0.15	-0.41	-0.28	-0.37	-0.25	-0.45
Q6IRH6	Phosphate carrier protein, mitochondrial OS=Rattus norvegicus OX=10116 GN=Slc25a3 PE=1 SV=1	26	0.68	0.525	1.052	0.761	0.977	0.489	1.038	0.888	1.012	1.194	-0.56	-0.93	0.07	-0.39	-0.03	-1.03	0.05	-0.17	0.02	0.26
A0A8I6AMC9	C3 and PZP-like, alpha-2-macroglobulin domain containing 8 OS=Rattus norvegicus OX=10116 GN=Cpamd8 PE=1 SV=1	42	0.965	1.035	0.863	1.009	1.04	1.019	1.02	1.028	0.997	0.877	-0.05	0.05	-0.21	0.01	0.06	0.03	0.03	0.04	0	-0.19
F1M866	Sorbin and SH3 domain containing 1 OS=Rattus norvegicus OX=10116 GN=Sorbs1 PE=1 SV=2	47	1.077	0.898	1.065	1.036	1.2	0.917	1.205	1.231	1.29	1.35	0.11	-0.16	0.09	0.05	0.26	-0.12	0.27	0.3	0.37	0.43
A0A8I6A4G0	Tensin 1 OS=Rattus norvegicus OX=10116 GN=Tns1 PE=1 SV=1	54	0.96	0.916	1.013	0.962	1.024	1.095	0.997	1.079	1.001	1.007	-0.06	-0.13	0.02	-0.06	0.03	0.13	0	0.11	0	0.01
A1A5L2	Pgm1 protein (Fragment) OS=Rattus norvegicus OX=10116 GN=Pgm1 PE=2 SV=1	38	0.922	0.775	1.001	1.032	1.09	0.745	1.058	0.957	0.999	1.041	-0.12	-0.37	0	0.05	0.12	-0.43	0.08	-0.06	0	0.06
A0A8I6AA99	Sorbin and SH3 domain containing 2 OS=Rattus norvegicus OX=10116 GN=Sorbs2 PE=1 SV=1	42	1.067	0.973	1.038	0.981	1.023	0.808	1.004	0.973	0.997	1.03	0.09	-0.04	0.05	-0.03	0.03	-0.31	0.01	-0.04	0	0.04
A0A8I5ZQ25	Laminin subunit beta 1 OS=Rattus norvegicus OX=10116 GN=Lamb1 PE=1 SV=1	48	1.205	1.048	1.184	1.146	1.14	0.89	0.93	0.929	0.902	0.951	0.27	0.07	0.24	0.2	0.19	-0.17	-0.1	-0.11	-0.15	-0.07
A0A8I6A8G9	Propionyl-CoA carboxylase alpha chain, mitochondrial OS=Rattus norvegicus OX=10116 GN=Pcca PE=1 SV=1	38	0.972	0.814	1.011	1.011	1.036	0.793	1.069	1.01	1.046	1.068	-0.04	-0.3	0.02	0.02	0.05	-0.33	0.1	0.01	0.07	0.1
A0A0G2K5U9	Actinin alpha 4 OS=Rattus norvegicus OX=10116 GN=Actn4 PE=1 SV=2	46	1.252	2.416	0.717	1.218	0.606	1.872	1.224	1.291	1.111	1.672	0.32	1.27	-0.48	0.28	-0.72	0.9	0.29	0.37	0.15	0.74
D3ZEY0	Coiled-coil domain containing 141 OS=Rattus norvegicus OX=10116 GN=Ccdc141 PE=1 SV=2	53	0.987	0.897	1.065	0.976	1.045	0.778	1.039	1.142	1.055	1.087	-0.02	-0.16	0.09	-0.04	0.06	-0.36	0.06	0.19	0.08	0.12
A0A8I6AAB9	L-lactate dehydrogenase OS=Rattus norvegicus OX=10116 GN=Ldha PE=1 SV=1	33	0.812	0.741	1.018	0.926	1.009	0.803	1.017	0.904	0.955	1.027	-0.3	-0.43	0.03	-0.11	0.01	-0.32	0.02	-0.15	-0.07	0.04
Q4V8H8	EH domain-containing protein 2 OS=Rattus norvegicus OX=10116 GN=Ehd2 PE=1 SV=1	37	0.833	0.912	0.977	0.923	1.025	1.083	1.025	0.996	1.023	1.084	-0.26	-0.13	-0.03	-0.12	0.04	0.12	0.03	-0.01	0.03	0.12
A0A8L2R1Q6	Hemoglobin, beta adult major chain OS=Rattus norvegicus OX=10116 GN=Hbb PE=1 SV=1	18	1.224	1.678	1.011	1.17	0.745	1.166	0.889	1.195	0.991	0.723	0.29	0.75	0.02	0.23	-0.42	0.22	-0.17	0.26	-0.01	-0.47
F1LX07	Electrogenic aspartate/glutamate antiporter SLC25A12, mitochondrial OS=Rattus norvegicus OX=10116 GN=Slc25a12 PE=3 SV=5	34	0.839	0.661	1.173	0.988	1.066	0.592	1.102	1.114	1.112	1.223	-0.25	-0.6	0.23	-0.02	0.09	-0.76	0.14	0.16	0.15	0.29
A0A096MJ01	LIM domain binding 3 OS=Rattus norvegicus OX=10116 GN=Ldb3 PE=1 SV=2	28	1.096	0.977	1.074	1.019	1.055	0.807	1.036	0.989	1.014	1.057	0.13	-0.03	0.1	0.03	0.08	-0.31	0.05	-0.02	0.02	0.08
A0A8I6A888	Ubiquinol cytochrome c reductase core protein 2 OS=Rattus norvegicus OX=10116 GN=Uqcrc2 PE=1 SV=1	34	0.919	0.907	0.985	0.994	1.014	0.692	1.06	0.99	0.994	1	-0.12	-0.14	-0.02	-0.01	0.02	-0.53	0.08	-0.01	-0.01	0
A0A8L2Q0G8	Dynamin 1-like OS=Rattus norvegicus OX=10116 GN=Dnm1l PE=1 SV=1	43	0.905	1.003	0.973	0.973	1.041	0.892	1.011	0.995	0.988	1.01	-0.14	0	-0.04	-0.04	0.06	-0.16	0.02	-0.01	-0.02	0.01
Q6P0K8	Junction plakoglobin OS=Rattus norvegicus OX=10116 GN=Jup PE=1 SV=1	36	1.013	0.869	1.09	0.981	1.034	0.754	1.049	0.986	1.017	1.043	0.02	-0.2	0.12	-0.03	0.05	-0.41	0.07	-0.02	0.02	0.06
Q5EB49	phosphopyruvate hydratase OS=Rattus norvegicus OX=10116 GN=Eno1 PE=2 SV=1	27	0.982	0.944	1.028	1.038	1.053	0.943	1.068	1.01	1.013	1.007	-0.03	-0.08	0.04	0.05	0.07	-0.08	0.1	0.01	0.02	0.01
P31000	Vimentin OS=Rattus norvegicus OX=10116 GN=Vim PE=1 SV=2	38	0.957	1.296	0.911	0.865	0.83	1.884	0.965	1.055	1.035	0.993	-0.06	0.37	-0.14	-0.21	-0.27	0.91	-0.05	0.08	0.05	-0.01
Q5EBC0	Inter alpha-trypsin inhibitor, heavy chain 4 OS=Rattus norvegicus OX=10116 GN=Itih4 PE=1 SV=1	40	0.952	1.494	0.76	1.015	0.868	1.833	0.944	1.025	0.958	0.762	-0.07	0.58	-0.4	0.02	-0.2	0.87	-0.08	0.03	-0.06	-0.39
A0A0G2JSP8	creatine kinase OS=Rattus norvegicus OX=10116 GN=Ckm PE=1 SV=1	27	1.034	0.907	1.038	1.06	1.084	0.783	1.061	1.062	1.021	1.015	0.05	-0.14	0.05	0.08	0.12	-0.35	0.09	0.09	0.03	0.02
A0A8I6ADR3	Moesin OS=Rattus norvegicus OX=10116 GN=Msn PE=1 SV=1	49	0.91	0.915	1.006	1.007	1.011	1.081	1.063	1.008	1.037	1.047	-0.14	-0.13	0.01	0.01	0.02	0.11	0.09	0.01	0.05	0.07
O35303	Dynamin-1-like protein OS=Rattus norvegicus OX=10116 GN=Dnm1l PE=1 SV=1	41	0.744	1.222	0.956	1.039	0.845	1.576	0.966	1.08	0.917	0.984	-0.43	0.29	-0.06	0.06	-0.24	0.66	-0.05	0.11	-0.12	-0.02
P05065	Fructose-bisphosphate aldolase A OS=Rattus norvegicus OX=10116 GN=Aldoa PE=1 SV=2	29	0.887	0.794	1.062	0.964	1.012	0.895	1.06	0.976	1.041	1.151	-0.17	-0.33	0.09	-0.05	0.02	-0.16	0.08	-0.04	0.06	0.2
A0A8I5ZXF1	Hemoglobin, beta adult major chain OS=Rattus norvegicus OX=10116 GN=Hbb PE=1 SV=1	16	1.153	1.646	0.812	1.134	0.858	1.059	0.882	1.031	0.879	0.659	0.21	0.72	-0.3	0.18	-0.22	0.08	-0.18	0.04	-0.19	-0.6
A0A8I6AQL9	Similar to heat shock protein 8 OS=Rattus norvegicus OX=10116 GN=Hspa8-ps23 PE=3 SV=1	37	0.868	0.847	0.621	0.767	0.828	0.819	0.861	0.887	0.774	0.6	-0.2	-0.24	-0.69	-0.38	-0.27	-0.29	-0.22	-0.17	-0.37	-0.74
P10860	Glutamate dehydrogenase 1, mitochondrial OS=Rattus norvegicus OX=10116 GN=Glud1 PE=1 SV=2	30	0.846	0.857	1.002	1.006	1.054	0.857	1.066	1.014	1.006	1.039	-0.24	-0.22	0	0.01	0.08	-0.22	0.09	0.02	0.01	0.05
A0A0A0MP82	Hemoglobin alpha, adult chain 1 OS=Rattus norvegicus OX=10116 GN=Hba-a3 PE=1 SV=1	20	1.351	2.129	0.758	1.135	0.756	1.209	0.881	1.12	0.91	0.604	0.43	1.09	-0.4	0.18	-0.4	0.27	-0.18	0.16	-0.14	-0.73
M0R6K0	Laminin subunit beta 2 OS=Rattus norvegicus OX=10116 GN=Lamb2 PE=1 SV=1	41	1.206	1.23	1.031	1.119	1.006	1.067	0.959	0.987	0.935	0.893	0.27	0.3	0.04	0.16	0.01	0.09	-0.06	-0.02	-0.1	-0.16
Q641Y2	NADH dehydrogenase [ubiquinone] iron-sulfur protein 2, mitochondrial OS=Rattus norvegicus OX=10116 GN=Ndufs2 PE=1 SV=1	24	0.931	0.758	1.036	0.968	1.04	0.688	1.045	0.961	1.032	1.086	-0.1	-0.4	0.05	-0.05	0.06	-0.54	0.06	-0.06	0.05	0.12
Q66HD0	Endoplasmin OS=Rattus norvegicus OX=10116 GN=Hsp90b1 PE=1 SV=2	39	0.9	1.462	0.885	0.98	0.984	1.414	0.972	1.003	0.955	0.918	-0.15	0.55	-0.18	-0.03	-0.02	0.5	-0.04	0	-0.07	-0.12
A0A8I6A2Z2	Fatty acid synthase OS=Rattus norvegicus OX=10116 GN=Fasn PE=1 SV=1	48	0.732	1.391	0.639	0.814	0.719	4.545	0.808	0.96	0.763	0.646	-0.45	0.48	-0.65	-0.3	-0.48	2.18	-0.31	-0.06	-0.39	-0.63
F1LM47	Succinate--CoA ligase [ADP-forming] subunit beta, mitochondrial OS=Rattus norvegicus OX=10116 GN=Sucla2 PE=1 SV=1	32	0.752	0.7	1.083	0.906	1.032	0.809	1.098	0.991	1.046	1.148	-0.41	-0.52	0.12	-0.14	0.05	-0.31	0.13	-0.01	0.06	0.2
A0A8I6A8K3	Pyruvate dehydrogenase E1 component subunit beta OS=Rattus norvegicus OX=10116 GN=Pdhb PE=1 SV=1	19	0.875	0.682	1.046	0.954	1.055	0.695	1.078	0.978	1.044	1.116	-0.19	-0.55	0.06	-0.07	0.08	-0.53	0.11	-0.03	0.06	0.16
P00564	Creatine kinase M-type OS=Rattus norvegicus OX=10116 GN=Ckm PE=1 SV=2	26	1.055	0.945	1.027	1.09	1.207	1.315	1.027	1.269	0.935	0.944	0.08	-0.08	0.04	0.12	0.27	0.4	0.04	0.34	-0.1	-0.08
P17764	Acetyl-CoA acetyltransferase, mitochondrial OS=Rattus norvegicus OX=10116 GN=Acat1 PE=1 SV=1	30	0.909	0.744	1.071	1.008	1.027	0.739	1.029	1.016	1.011	1.093	-0.14	-0.43	0.1	0.01	0.04	-0.44	0.04	0.02	0.02	0.13
A0A0G2JXT8	Filamin B OS=Rattus norvegicus OX=10116 GN=Flnb PE=1 SV=1	54	0.921	0.987	0.929	0.961	1.001	1.268	0.956	0.97	0.998	0.973	-0.12	-0.02	-0.11	-0.06	0	0.34	-0.06	-0.04	0	-0.04
Q9JM53	Apoptosis-inducing factor 1, mitochondrial OS=Rattus norvegicus OX=10116 GN=Aifm1 PE=1 SV=1	34	0.878	0.699	1.063	0.973	1.026	0.735	1.064	0.956	1.021	1.115	-0.19	-0.52	0.09	-0.04	0.04	-0.44	0.09	-0.07	0.03	0.16
A0A0G2K7K2	Apoptosis inducing factor, mitochondria associated 1 OS=Rattus norvegicus OX=10116 GN=Aifm1 PE=1 SV=1	34	0.252	0.283	0.8	0.486	1.099	0.925	0.767	0.569	0.844	0.735	-1.99	-1.82	-0.32	-1.04	0.14	-0.11	-0.38	-0.81	-0.25	-0.44
Q6P6V0	Glucose-6-phosphate isomerase OS=Rattus norvegicus OX=10116 GN=Gpi PE=1 SV=1	33	0.882	0.923	0.958	0.995	1.03	0.907	1.022	0.983	0.999	1.059	-0.18	-0.12	-0.06	-0.01	0.04	-0.14	0.03	-0.02	0	0.08
A0A8I6AKF7	Voltage-dependent anion channel 1 OS=Rattus norvegicus OX=10116 GN=Vdac1 PE=1 SV=1	24	0.924	0.844	1.032	0.986	0.988	0.72	1.067	0.954	1.017	1.06	-0.11	-0.24	0.05	-0.02	-0.02	-0.47	0.09	-0.07	0.02	0.08
M0R660	Glyceraldehyde-3-phosphate dehydrogenase OS=Rattus norvegicus OX=10116 GN=AABR07070043.1 PE=1 SV=1	23	0.697	0.661	1.152	1.001	0.992	1.223	1.307	0.683	0.8	1.298	-0.52	-0.6	0.2	0	-0.01	0.29	0.39	-0.55	-0.32	0.38
Q9WVK7	Hydroxyacyl-coenzyme A dehydrogenase, mitochondrial OS=Rattus norvegicus OX=10116 GN=Hadh PE=2 SV=1	26	0.882	0.653	1.071	0.999	1.078	0.694	1.061	0.98	0.988	1.13	-0.18	-0.62	0.1	0	0.11	-0.53	0.09	-0.03	-0.02	0.18
G3V7Q7	IQ motif containing GTPase activating protein 1 OS=Rattus norvegicus OX=10116 GN=Iqgap1 PE=1 SV=1	44	0.98	1.328	0.859	0.975	0.959	1.64	0.977	1.051	1.022	0.918	-0.03	0.41	-0.22	-0.04	-0.06	0.71	-0.03	0.07	0.03	-0.12
A0A8I6A5M1	Fibronectin OS=Rattus norvegicus OX=10116 GN=Fn1 PE=1 SV=1	44	1.722	1.916	1.228	1.31	1.086	2.253	1.105	1.176	1.078	0.92	0.78	0.94	0.3	0.39	0.12	1.17	0.14	0.23	0.11	-0.12
Q5XIT9	Methylcrotonoyl-CoA carboxylase beta chain, mitochondrial OS=Rattus norvegicus OX=10116 GN=Mccc2 PE=2 SV=1	30	0.898	0.811	0.965	0.979	1.041	0.784	1.055	0.969	0.993	1.055	-0.15	-0.3	-0.05	-0.03	0.06	-0.35	0.08	-0.05	-0.01	0.08
A0A8I6AUZ1	hexokinase OS=Rattus norvegicus OX=10116 GN=Hk1 PE=1 SV=1	42	0.939	0.712	1.042	0.936	1.016	0.681	1.076	1.029	1.066	1.112	-0.09	-0.49	0.06	-0.09	0.02	-0.56	0.11	0.04	0.09	0.15
A0A1K0FUH3	Globin c2 OS=Rattus norvegicus OX=10116 GN=Hba-a2 PE=3 SV=1	18	1.366	2.312	0.77	1.204	0.698	1.522	0.882	1.199	0.901	0.561	0.45	1.21	-0.38	0.27	-0.52	0.61	-0.18	0.26	-0.15	-0.83
A0A8I6GBX4	Dihydrolipoyl dehydrogenase OS=Rattus norvegicus OX=10116 GN=Dld PE=1 SV=1	23	0.926	0.755	0.997	1.064	1.114	0.697	1.043	0.921	0.979	1.039	-0.11	-0.41	0	0.09	0.16	-0.52	0.06	-0.12	-0.03	0.05
P13803	Electron transfer flavoprotein subunit alpha, mitochondrial OS=Rattus norvegicus OX=10116 GN=Etfa PE=1 SV=4	24	0.793	0.663	1.03	0.906	1.022	0.685	1.001	0.885	0.955	1.055	-0.33	-0.59	0.04	-0.14	0.03	-0.55	0	-0.18	-0.07	0.08
A0A8I6APU1	Nebulette OS=Rattus norvegicus OX=10116 GN=Nebl PE=4 SV=1	37	1.109	0.838	1.092	1.018	1.037	0.616	1.021	1.027	1.048	1.03	0.15	-0.25	0.13	0.03	0.05	-0.7	0.03	0.04	0.07	0.04
Q2PQA9	Kinesin-1 heavy chain OS=Rattus norvegicus OX=10116 GN=Kif5b PE=1 SV=1	46	0.925	0.955	0.96	0.963	1.035	0.978	1.068	1.004	1.048	1.059	-0.11	-0.07	-0.06	-0.05	0.05	-0.03	0.09	0.01	0.07	0.08
Q4V8F9	Hydroxysteroid dehydrogenase-like protein 2 OS=Rattus norvegicus OX=10116 GN=Hsdl2 PE=2 SV=1	28	0.859	0.757	1.011	0.964	1.053	0.689	1.077	1.049	1.079	1.106	-0.22	-0.4	0.02	-0.05	0.07	-0.54	0.11	0.07	0.11	0.15
G3V7C6	Tubulin beta chain OS=Rattus norvegicus OX=10116 GN=Tubb4b PE=1 SV=3	20	0.933	1.137	0.92	1.014	1.024	0.932	1.049	1.041	1.022	0.989	-0.1	0.18	-0.12	0.02	0.03	-0.1	0.07	0.06	0.03	-0.02
Q641Z6	EH domain-containing protein 1 OS=Rattus norvegicus OX=10116 GN=Ehd1 PE=1 SV=1	36	1.147	0.897	1.003	0.962	1.025	0.824	1.061	0.932	1.043	1.03	0.2	-0.16	0	-0.06	0.04	-0.28	0.09	-0.1	0.06	0.04
A0A8I6AK25	phosphopyruvate hydratase OS=Rattus norvegicus OX=10116 GN=Eno3 PE=1 SV=1	24	0.95	0.907	1.048	1.039	1.018	0.883	1.091	1.03	0.96	1.006	-0.07	-0.14	0.07	0.06	0.03	-0.18	0.13	0.04	-0.06	0.01
B0BMW2	Hydroxyacyl-Coenzyme A dehydrogenase type II OS=Rattus norvegicus OX=10116 GN=Hsd17b10 PE=2 SV=1	20	0.895	0.798	1.026	0.992	1.054	0.735	1.052	1.012	1.029	1.068	-0.16	-0.33	0.04	-0.01	0.08	-0.44	0.07	0.02	0.04	0.09
A0A8I6A721	Malate dehydrogenase OS=Rattus norvegicus OX=10116 GN=Mdh1 PE=1 SV=1	24	0.88	0.831	0.994	1.026	1.059	0.839	1.031	0.966	0.975	1.024	-0.18	-0.27	-0.01	0.04	0.08	-0.25	0.04	-0.05	-0.04	0.03
P08461	Dihydrolipoyllysine-residue acetyltransferase component of pyruvate dehydrogenase complex, mitochondrial OS=Rattus norvegicus OX=10116 GN=Dlat PE=1 SV=3	24	0.925	0.81	0.999	0.971	1.002	0.797	1.016	0.981	0.992	1.041	-0.11	-0.3	0	-0.04	0	-0.33	0.02	-0.03	-0.01	0.06
A0A8I5Y6I0	Myosin light chain 2 OS=Rattus norvegicus OX=10116 GN=Myl2 PE=1 SV=1	20	1.416	0.559	1.266	1.278	1.319	0.491	0.894	0.982	0.814	0.86	0.5	-0.84	0.34	0.35	0.4	-1.03	-0.16	-0.03	-0.3	-0.22
F1M9V7	Aminopeptidase OS=Rattus norvegicus OX=10116 GN=Npepps PE=1 SV=1	39	0.929	1.115	0.901	1.003	1.015	1.015	1.018	1	0.989	0.973	-0.11	0.16	-0.15	0	0.02	0.02	0.03	0	-0.02	-0.04
F1M853	Ribosome binding protein 1 OS=Rattus norvegicus OX=10116 GN=Rrbp1 PE=1 SV=3	45	0.886	1.226	0.94	1.035	1.01	1.49	1.028	1.062	1.017	1.02	-0.17	0.29	-0.09	0.05	0.01	0.57	0.04	0.09	0.02	0.03
A0A8I6ANE0	Dihydropyrimidinase-like 2 OS=Rattus norvegicus OX=10116 GN=Dpysl2 PE=1 SV=1	26	0.86	1.437	0.896	0.967	0.935	1.439	0.926	0.948	0.908	0.92	-0.22	0.52	-0.16	-0.05	-0.1	0.53	-0.11	-0.08	-0.14	-0.12
F1LZW6	Electrogenic aspartate/glutamate antiporter SLC25A13, mitochondrial OS=Rattus norvegicus OX=10116 GN=Slc25a13 PE=3 SV=4	30	0.79	0.732	1.027	0.922	1.02	0.692	1.069	0.993	1.062	1.109	-0.34	-0.45	0.04	-0.12	0.03	-0.53	0.1	-0.01	0.09	0.15
A0A8L2QPR2	Microtubule-associated protein OS=Rattus norvegicus OX=10116 GN=Map4 PE=1 SV=1	41	1.198	1.962	0.799	1.142	0.958	1.069	0.896	1.062	1.124	0.761	0.26	0.97	-0.32	0.19	-0.06	0.1	-0.16	0.09	0.17	-0.39
F1M944	Calsequestrin OS=Rattus norvegicus OX=10116 GN=Casq2 PE=1 SV=3	21	0.883	0.778	1.024	0.969	1.045	0.62	1.089	0.985	1.073	1.111	-0.18	-0.36	0.03	-0.05	0.06	-0.69	0.12	-0.02	0.1	0.15
F1LRJ9	Methanethiol oxidase OS=Rattus norvegicus OX=10116 GN=Selenbp1 PE=3 SV=2	30	0.899	1.221	0.885	1.022	0.973	1.17	1.012	1.055	0.982	0.937	-0.15	0.29	-0.18	0.03	-0.04	0.23	0.02	0.08	-0.03	-0.09
F1LST1	Fibronectin OS=Rattus norvegicus OX=10116 GN=Fn1 PE=1 SV=3	44	1.086	1.308	0.859	1.037	0.878	1.637	0.871	1.005	0.926	0.805	0.12	0.39	-0.22	0.05	-0.19	0.71	-0.2	0.01	-0.11	-0.31
Q66HF3	Electron transfer flavoprotein-ubiquinone oxidoreductase OS=Rattus norvegicus OX=10116 GN=Etfdh PE=1 SV=1	31	0.923	0.628	1.144	0.978	1.039	0.688	1.094	0.988	1.063	1.178	-0.12	-0.67	0.19	-0.03	0.06	-0.54	0.13	-0.02	0.09	0.24
M0R7S5	Perilipin 4 OS=Rattus norvegicus OX=10116 GN=Plin4 PE=3 SV=3	24	0.977	0.922	1.042	1.031	1.063	0.72	1.05	1.007	1.045	1.039	-0.03	-0.12	0.06	0.04	0.09	-0.47	0.07	0.01	0.06	0.06
F1LTF8	Laminin subunit alpha 4 OS=Rattus norvegicus OX=10116 GN=Lama4 PE=1 SV=4	42	1.102	1.055	1.005	1.036	1.138	1.042	0.958	0.922	0.967	0.955	0.14	0.08	0.01	0.05	0.19	0.06	-0.06	-0.12	-0.05	-0.07
A0A8I6GES0	Citrate synthase OS=Rattus norvegicus OX=10116 GN=Cs PE=1 SV=1	26	0.968	0.742	1.073	1.077	1.113	0.717	1.052	0.985	1.017	1.072	-0.05	-0.43	0.1	0.11	0.15	-0.48	0.07	-0.02	0.02	0.1
A0A8I5ZYV5	ATPase sarcoplasmic/endoplasmic reticulum Ca2+ transporting 1 OS=Rattus norvegicus OX=10116 GN=Atp2a1 PE=1 SV=1	24	1.045	0.953	0.882	1.059	1.18	0.438	1.21	1.113	1.144	0.788	0.06	-0.07	-0.18	0.08	0.24	-1.19	0.28	0.15	0.19	-0.34
A0A8I5Y643	ADP/ATP translocase OS=Rattus norvegicus OX=10116 GN=Slc25a6 PE=1 SV=1	19	0.702	0.819	0.861	0.782	1.073	0.663	1.013	1.726	1.024	2.262	-0.51	-0.29	-0.22	-0.35	0.1	-0.59	0.02	0.79	0.03	1.18
Q561S0	NADH dehydrogenase [ubiquinone] 1 alpha subcomplex subunit 10, mitochondrial OS=Rattus norvegicus OX=10116 GN=Ndufa10 PE=1 SV=1	26	0.745	0.638	1.188	0.917	1.001	0.648	1.135	1.015	1.104	1.232	-0.42	-0.65	0.25	-0.13	0	-0.63	0.18	0.02	0.14	0.3
A0A8I6A1M5	Acyl-CoA thioesterase 2 OS=Rattus norvegicus OX=10116 GN=Acot2 PE=1 SV=1	22	0.93	0.666	1.024	1.031	1.058	0.655	1.032	0.932	0.981	1.016	-0.1	-0.59	0.03	0.04	0.08	-0.61	0.04	-0.1	-0.03	0.02
P05545	Serine protease inhibitor A3K OS=Rattus norvegicus OX=10116 GN=Serpina3k PE=1 SV=3	23	0.829	1.091	0.782	0.918	0.906	1.872	0.887	1.051	0.973	0.766	-0.27	0.13	-0.36	-0.12	-0.14	0.9	-0.17	0.07	-0.04	-0.38
Q4FZZ4	Pyruvate dehydrogenase E1 component subunit alpha OS=Rattus norvegicus OX=10116 GN=Pdha1 PE=2 SV=1	27	1.041	0.982	0.991	1.015	0.978	0.828	1.079	1.038	1.016	1.011	0.06	-0.03	-0.01	0.02	-0.03	-0.27	0.11	0.05	0.02	0.02
Q68FZ8	Propionyl coenzyme A carboxylase, beta polypeptide OS=Rattus norvegicus OX=10116 GN=Pccb PE=1 SV=1	27	0.926	0.751	1.023	0.967	1.02	0.738	1.079	0.947	1.014	1.099	-0.11	-0.41	0.03	-0.05	0.03	-0.44	0.11	-0.08	0.02	0.14
P69897	Tubulin beta-5 chain OS=Rattus norvegicus OX=10116 GN=Tubb5 PE=1 SV=1	20	0.819	1.181	0.858	0.871	0.969	1.271	0.987	0.944	1.035	0.991	-0.29	0.24	-0.22	-0.2	-0.05	0.35	-0.02	-0.08	0.05	-0.01
A0A8I6A3W0	NADH:ubiquinone oxidoreductase subunit A9 OS=Rattus norvegicus OX=10116 GN=Ndufa9 PE=1 SV=1	31	0.726	0.586	1.054	0.942	1.028	0.573	1.127	0.994	1.06	1.119	-0.46	-0.77	0.08	-0.09	0.04	-0.8	0.17	-0.01	0.08	0.16
E9PT87	Myosin light chain kinase 3 OS=Rattus norvegicus OX=10116 GN=Mylk3 PE=1 SV=1	29	0.8	1.001	0.933	0.953	0.988	0.798	1.038	1.089	1.014	1.068	-0.32	0	-0.1	-0.07	-0.02	-0.32	0.05	0.12	0.02	0.09
A0A8I6GJ92	Glutamyl-prolyl-tRNA synthetase OS=Rattus norvegicus OX=10116 GN=Eprs1 PE=1 SV=1	41	0.838	0.918	0.954	0.866	0.983	0.976	1.082	1.027	1.078	1.081	-0.26	-0.12	-0.07	-0.21	-0.02	-0.03	0.11	0.04	0.11	0.11
Q63638	Striated muscle-specific serine/threonine-protein kinase OS=Rattus norvegicus OX=10116 GN=Speg PE=1 SV=2	47	0.958	0.915	1.015	0.951	0.994	0.815	1.021	1.011	1.054	1.084	-0.06	-0.13	0.02	-0.07	-0.01	-0.3	0.03	0.02	0.08	0.12
P13221	Aspartate aminotransferase, cytoplasmic OS=Rattus norvegicus OX=10116 GN=Got1 PE=1 SV=3	29	0.905	0.692	1.085	1.046	1.04	0.65	1.108	0.998	1.012	1.131	-0.14	-0.53	0.12	0.06	0.06	-0.62	0.15	0	0.02	0.18
Q62651	Delta(3,5)-Delta(2,4)-dienoyl-CoA isomerase, mitochondrial OS=Rattus norvegicus OX=10116 GN=Ech1 PE=1 SV=2	18	0.963	0.74	1.036	1.115	1.117	0.728	1.073	1.052	1.029	1.083	-0.05	-0.44	0.05	0.16	0.16	-0.46	0.1	0.07	0.04	0.11
A0A8L2R6L7	Hemoglobin, beta adult major chain OS=Rattus norvegicus OX=10116 GN=Hbb PE=1 SV=1	14	1.459	2.535	0.705	1.258	0.718	1.301	0.881	1.176	0.89	0.465	0.54	1.34	-0.5	0.33	-0.48	0.38	-0.18	0.23	-0.17	-1.1
P07633	Propionyl-CoA carboxylase beta chain, mitochondrial OS=Rattus norvegicus OX=10116 GN=Pccb PE=2 SV=1	24	0.868	0.702	0.955	1.018	1.106	0.711	0.995	0.985	0.989	1.119	-0.2	-0.51	-0.07	0.03	0.15	-0.49	-0.01	-0.02	-0.02	0.16
A0A140TAE0	Major vault protein OS=Rattus norvegicus OX=10116 GN=Mvp PE=1 SV=1	38	0.976	1.197	0.986	1.039	1.017	1.076	1.092	0.972	1.102	1.05	-0.03	0.26	-0.02	0.06	0.02	0.11	0.13	-0.04	0.14	0.07
P14668	Annexin A5 OS=Rattus norvegicus OX=10116 GN=Anxa5 PE=1 SV=3	26	0.958	1.383	0.935	0.956	1.009	1.174	1.015	0.912	0.992	0.986	-0.06	0.47	-0.1	-0.06	0.01	0.23	0.02	-0.13	-0.01	-0.02
Q5M7T5	Antithrombin-III OS=Rattus norvegicus OX=10116 GN=Serpinc1 PE=1 SV=1	28	0.9	1.352	0.853	1.006	0.974	1.351	0.952	1.025	0.976	0.87	-0.15	0.43	-0.23	0.01	-0.04	0.43	-0.07	0.04	-0.04	-0.2
A0A8I5ZLC2	Aconitase 1 OS=Rattus norvegicus OX=10116 GN=Aco1 PE=1 SV=1	36	0.894	1.037	0.911	0.99	0.973	1.123	0.998	0.974	0.971	0.967	-0.16	0.05	-0.13	-0.01	-0.04	0.17	0	-0.04	-0.04	-0.05
Q5XIF6	Tubulin alpha-4A chain OS=Rattus norvegicus OX=10116 GN=Tuba4a PE=1 SV=1	27	0.95	1.137	0.96	0.916	0.991	1.071	0.99	0.987	1	1.01	-0.07	0.19	-0.06	-0.13	-0.01	0.1	-0.01	-0.02	0	0.02
P04762	Catalase OS=Rattus norvegicus OX=10116 GN=Cat PE=1 SV=3	28	0.947	1.332	0.887	1.025	0.942	1.51	0.996	1.086	1.036	0.851	-0.08	0.41	-0.17	0.04	-0.09	0.59	-0.01	0.12	0.05	-0.23
P68370	Tubulin alpha-1A chain OS=Rattus norvegicus OX=10116 GN=Tuba1a PE=1 SV=1	25	0.845	1.266	0.947	0.882	0.986	1.377	0.987	1.02	1.006	1.02	-0.24	0.34	-0.08	-0.18	-0.02	0.46	-0.02	0.03	0.01	0.03
P50399	Rab GDP dissociation inhibitor beta OS=Rattus norvegicus OX=10116 GN=Gdi2 PE=1 SV=2	30	0.892	1.088	0.932	0.98	0.98	1.018	1.018	0.964	1.008	0.968	-0.17	0.12	-0.1	-0.03	-0.03	0.03	0.03	-0.05	0.01	-0.05
A0A0G2K8R3	LIM domain 7 OS=Rattus norvegicus OX=10116 GN=Lmo7 PE=1 SV=2	44	1.064	0.938	1.041	1.03	1.049	0.852	1.022	1.023	1.026	1.058	0.09	-0.09	0.06	0.04	0.07	-0.23	0.03	0.03	0.04	0.08
F1LP30	Methylcrotonoyl-CoA carboxylase 1 OS=Rattus norvegicus OX=10116 GN=Mccc1 PE=1 SV=2	31	0.96	1.017	0.976	1.018	0.993	0.931	1.05	1.013	1.014	0.994	-0.06	0.02	-0.03	0.03	-0.01	-0.1	0.07	0.02	0.02	-0.01
P05544	Serine protease inhibitor A3L OS=Rattus norvegicus OX=10116 GN=Serpina3l PE=1 SV=3	23	0.967	1.345	0.789	0.964	0.917	1.771	0.928	1.189	1.051	0.784	-0.05	0.43	-0.34	-0.05	-0.12	0.82	-0.11	0.25	0.07	-0.35
B1WC61	Complex I assembly factor ACAD9, mitochondrial OS=Rattus norvegicus OX=10116 GN=Acad9 PE=1 SV=1	34	0.915	0.824	0.987	1.016	1.059	0.785	1.077	1.007	1.035	1.046	-0.13	-0.28	-0.02	0.02	0.08	-0.35	0.11	0.01	0.05	0.07
P85108	Tubulin beta-2A chain OS=Rattus norvegicus OX=10116 GN=Tubb2a PE=1 SV=1	20	0.912	1.194	0.929	0.941	0.968	1.131	0.965	1.009	1.007	0.995	-0.13	0.26	-0.11	-0.09	-0.05	0.18	-0.05	0.01	0.01	-0.01
Q5XIH7	Prohibitin-2 OS=Rattus norvegicus OX=10116 GN=Phb2 PE=1 SV=1	29	0.914	0.671	1.048	0.99	1.075	0.694	1.063	0.999	1.025	1.069	-0.13	-0.58	0.07	-0.01	0.1	-0.53	0.09	0	0.04	0.1
A0A0G2JXR0	LIM domain binding 3 OS=Rattus norvegicus OX=10116 GN=Ldb3 PE=1 SV=2	17	1.111	0.93	1.029	0.998	1.032	0.883	0.995	1.064	0.983	0.997	0.15	-0.1	0.04	0	0.05	-0.18	-0.01	0.09	-0.02	0
A0A8L2UI37	TNF receptor-associated protein 1 OS=Rattus norvegicus OX=10116 GN=Trap1 PE=1 SV=1	31	0.961	1.088	0.957	0.995	1.02	1.051	1.051	1.083	1.056	1.027	-0.06	0.12	-0.06	-0.01	0.03	0.07	0.07	0.12	0.08	0.04
P67779	Prohibitin 1 OS=Rattus norvegicus OX=10116 GN=Phb1 PE=1 SV=1	26	0.886	0.709	1.019	0.959	1.065	0.693	1.048	0.973	0.993	1.026	-0.18	-0.5	0.03	-0.06	0.09	-0.53	0.07	-0.04	-0.01	0.04
D3ZIC4	Protein phosphatase 1 regulatory subunit OS=Rattus norvegicus OX=10116 GN=Ppp1r12b PE=1 SV=1	36	1.022	0.733	1.034	0.965	1.033	0.655	1.137	1.052	1.15	1.166	0.03	-0.45	0.05	-0.05	0.05	-0.61	0.18	0.07	0.2	0.22
A0A8J8XLC6	Hypoxia up-regulated 1 OS=Rattus norvegicus OX=10116 GN=Hyou1 PE=1 SV=1	34	0.95	1.141	0.945	1.018	1.088	1.082	1.027	1.07	1.055	1.042	-0.07	0.19	-0.08	0.03	0.12	0.11	0.04	0.1	0.08	0.06
A0A8I6GKX5	Inter-alpha trypsin inhibitor, heavy chain 3 OS=Rattus norvegicus OX=10116 GN=Itih3 PE=1 SV=1	25	0.782	1.245	0.797	0.917	0.872	1.749	0.968	1.086	0.998	0.815	-0.36	0.32	-0.33	-0.12	-0.2	0.81	-0.05	0.12	0	-0.3
A0A8I6GJV3	Sarcolemma associated protein OS=Rattus norvegicus OX=10116 GN=Slmap PE=1 SV=1	31	0.955	0.931	0.966	0.92	1.031	0.984	1.036	0.921	1.026	1.065	-0.07	-0.1	-0.05	-0.12	0.04	-0.02	0.05	-0.12	0.04	0.09
A0A0G2JZ73	Serpin family A member 1 OS=Rattus norvegicus OX=10116 GN=Serpina1 PE=1 SV=2	19	0.836	1.312	0.82	0.942	0.894	1.85	0.997	1.172	1.019	0.814	-0.26	0.39	-0.29	-0.09	-0.16	0.89	0	0.23	0.03	-0.3
A0A8L2Q996	Elongation factor 1-alpha OS=Rattus norvegicus OX=10116 GN=Eef1a2 PE=3 SV=1	26	0.808	0.903	1.054	0.922	1.043	0.917	1.103	0.987	1.034	1.094	-0.31	-0.15	0.08	-0.12	0.06	-0.13	0.14	-0.02	0.05	0.13
P62260	14-3-3 protein epsilon OS=Rattus norvegicus OX=10116 GN=Ywhae PE=1 SV=1	23	0.88	0.989	0.978	0.97	1.017	1.005	1.012	0.998	0.985	1.119	-0.18	-0.02	-0.03	-0.04	0.02	0.01	0.02	0	-0.02	0.16
F1M865	Sorbin and SH3 domain containing 1 OS=Rattus norvegicus OX=10116 GN=Sorbs1 PE=1 SV=2	34	0.936	0.682	1.051	0.915	1.051	0.84	1.01	1.045	0.983	0.997	-0.1	-0.55	0.07	-0.13	0.07	-0.25	0.01	0.06	-0.02	0
Q5XIH3	NADH dehydrogenase [ubiquinone] flavoprotein 1, mitochondrial OS=Rattus norvegicus OX=10116 GN=Ndufv1 PE=1 SV=1	25	0.979	0.719	1.1	0.966	1.018	0.646	1.098	1.065	1.035	1.12	-0.03	-0.48	0.14	-0.05	0.03	-0.63	0.13	0.09	0.05	0.16
O35567	Bifunctional purine biosynthesis protein ATIC OS=Rattus norvegicus OX=10116 GN=Atic PE=1 SV=2	26	0.93	0.962	0.976	1.009	1.016	1.04	1.036	1.007	1.019	1.016	-0.11	-0.06	-0.03	0.01	0.02	0.06	0.05	0.01	0.03	0.02
Q6IMX3	Acetyl-Coenzyme A dehydrogenase, short chain, isoform CRA_a OS=Rattus norvegicus OX=10116 GN=Acads PE=2 SV=1	25	0.892	0.768	0.987	0.989	1.079	0.708	1.063	0.991	1.003	1.033	-0.17	-0.38	-0.02	-0.02	0.11	-0.5	0.09	-0.01	0	0.05
A0A0G2JTL5	pyruvate carboxylase OS=Rattus norvegicus OX=10116 GN=Pc PE=1 SV=1	36	0.865	1.111	0.876	0.914	0.988	1.294	0.939	0.986	0.943	0.906	-0.21	0.15	-0.19	-0.13	-0.02	0.37	-0.09	-0.02	-0.09	-0.14
A0A8I6A156	Tropomyosin 1 OS=Rattus norvegicus OX=10116 GN=Tpm1 PE=1 SV=1	29	0.925	1.733	0.803	0.795	0.887	3.196	0.93	1.101	0.849	0.815	-0.11	0.79	-0.32	-0.33	-0.17	1.68	-0.1	0.14	-0.24	-0.29
B5DF63	Sarcolemma associated protein OS=Rattus norvegicus OX=10116 GN=Slmap PE=1 SV=1	30	0.998	0.937	1.011	1.027	1.137	0.74	1.101	1.079	1.064	1.11	0	-0.09	0.02	0.04	0.19	-0.43	0.14	0.11	0.09	0.15
A0A8I6GLE7	T-complex protein 1 subunit beta OS=Rattus norvegicus OX=10116 GN=Cct2 PE=1 SV=1	26	0.944	1.013	0.97	0.963	1.026	1.01	1.008	0.985	0.994	1.009	-0.08	0.02	-0.04	-0.05	0.04	0.01	0.01	-0.02	-0.01	0.01
A0A8I5ZQ05	Medium-chain specific acyl-CoA dehydrogenase, mitochondrial OS=Rattus norvegicus OX=10116 GN=Acadm PE=1 SV=1	26	0.943	0.646	1.019	1.039	1.113	0.712	1.086	0.986	1.011	1.057	-0.09	-0.63	0.03	0.05	0.15	-0.49	0.12	-0.02	0.02	0.08
B1H270	Succinate--CoA ligase [GDP-forming] subunit beta, mitochondrial OS=Rattus norvegicus OX=10116 GN=Suclg2 PE=2 SV=1	30	0.875	0.859	1.102	0.982	1.083	0.795	1.127	1.008	1.054	1.127	-0.19	-0.22	0.14	-0.03	0.12	-0.33	0.17	0.01	0.08	0.17
G3V6H5	Solute carrier family 25 (Mitochondrial carrier; oxoglutarate carrier), member 11, isoform CRA_b OS=Rattus norvegicus OX=10116 GN=Slc25a11 PE=1 SV=1	21	0.682	0.531	0.995	0.746	1.046	0.507	1.026	0.894	1.055	1.165	-0.55	-0.91	-0.01	-0.42	0.07	-0.98	0.04	-0.16	0.08	0.22
P23965	Enoyl-CoA delta isomerase 1, mitochondrial OS=Rattus norvegicus OX=10116 GN=Eci1 PE=1 SV=1	19	0.859	0.597	0.979	1.014	1.105	0.628	1.002	0.971	0.959	0.993	-0.22	-0.74	-0.03	0.02	0.14	-0.67	0	-0.04	-0.06	-0.01
F2Z3Q8	Karyopherin subunit beta 1 OS=Rattus norvegicus OX=10116 GN=Kpnb1 PE=1 SV=1	27	0.914	1.192	0.913	1.056	0.98	1.073	0.993	1.005	0.985	0.987	-0.13	0.25	-0.13	0.08	-0.03	0.1	-0.01	0.01	-0.02	-0.02
Q68FY0	Cytochrome b-c1 complex subunit 1, mitochondrial OS=Rattus norvegicus OX=10116 GN=Uqcrc1 PE=1 SV=1	23	1.016	0.868	1.024	1.026	1.022	0.841	1.05	1.03	1.015	1.065	0.02	-0.2	0.03	0.04	0.03	-0.25	0.07	0.04	0.02	0.09
A0A0G2K428	Dynactin subunit 1 OS=Rattus norvegicus OX=10116 GN=Dctn1 PE=1 SV=2	33	0.921	1.139	0.936	0.97	1.013	1.065	1.006	1.023	1.023	1.002	-0.12	0.19	-0.1	-0.04	0.02	0.09	0.01	0.03	0.03	0
O55147	Rattus norvegicus utrophin OS=Rattus norvegicus OX=10116 GN=Utrn PE=1 SV=1	43	1.017	1.162	0.925	1.003	1.043	1.232	0.999	1.028	1.026	0.972	0.02	0.22	-0.11	0	0.06	0.3	0	0.04	0.04	-0.04
A0A8L2QK91	Calnexin OS=Rattus norvegicus OX=10116 GN=Canx PE=1 SV=1	33	0.925	1.206	0.959	0.976	0.998	1.144	1.005	0.975	0.993	0.987	-0.11	0.27	-0.06	-0.04	0	0.19	0.01	-0.04	-0.01	-0.02
G3V7U4	Lamin B1 OS=Rattus norvegicus OX=10116 GN=Lmnb1 PE=1 SV=1	33	0.98	1.009	1.01	0.997	0.967	1.003	1.021	1.035	1.004	1.001	-0.03	0.01	0.01	0	-0.05	0	0.03	0.05	0.01	0
A0A8I6GAH4	Protein disulfide-isomerase OS=Rattus norvegicus OX=10116 GN=Pdia3 PE=1 SV=1	31	0.9	1.364	0.902	0.992	0.97	1.409	0.974	0.979	0.956	0.946	-0.15	0.45	-0.15	-0.01	-0.04	0.5	-0.04	-0.03	-0.07	-0.08
B5DEF6	Acyl-CoA dehydrogenase family, member 10 OS=Rattus norvegicus OX=10116 GN=Aldh2 PE=1 SV=1	35	0.747	0.561	0.991	0.931	1.093	0.67	1.036	0.916	0.975	1.046	-0.42	-0.83	-0.01	-0.1	0.13	-0.58	0.05	-0.13	-0.04	0.06
A0A8I6AIN6	Early endosome antigen 1 OS=Rattus norvegicus OX=10116 GN=Eea1 PE=1 SV=1	42	0.811	1.104	0.933	0.874	0.998	1.112	1.039	1.017	1.056	1.048	-0.3	0.14	-0.1	-0.2	0	0.15	0.06	0.02	0.08	0.07
A0A0G2K261	isoleucine--tRNA ligase OS=Rattus norvegicus OX=10116 GN=Iars2 PE=1 SV=2	27	1	1.022	0.994	1.015	1.015	0.885	1.025	0.967	1.003	0.999	0	0.03	-0.01	0.02	0.02	-0.18	0.04	-0.05	0	0
Q63270	Cytoplasmic aconitate hydratase OS=Rattus norvegicus OX=10116 GN=Aco1 PE=1 SV=1	33	1.137	1.093	1.085	1.172	1.284	1.144	1.21	1.171	1.188	1.065	0.19	0.13	0.12	0.23	0.36	0.19	0.27	0.23	0.25	0.09
D3ZKG1	Methylmalonyl-CoA mutase, mitochondrial OS=Rattus norvegicus OX=10116 GN=Mmut PE=1 SV=2	31	1.005	0.958	0.996	1.089	1.051	0.82	1.058	1.065	1.027	1.022	0.01	-0.06	-0.01	0.12	0.07	-0.29	0.08	0.09	0.04	0.03
P25113	Phosphoglycerate mutase 1 OS=Rattus norvegicus OX=10116 GN=Pgam1 PE=1 SV=4	16	0.836	1.304	0.945	0.985	0.913	1.419	0.966	0.918	0.938	0.948	-0.26	0.38	-0.08	-0.02	-0.13	0.5	-0.05	-0.12	-0.09	-0.08
Q91XN7	Tropomyosin alpha isoform OS=Rattus norvegicus OX=10116 GN=Tpm1 PE=2 SV=1	26	1.148	1.708	0.984	0.83	1.181	1.068	0.917	0.894	1.14	1.022	0.2	0.77	-0.02	-0.27	0.24	0.09	-0.12	-0.16	0.19	0.03
Q6AYZ1	Tubulin alpha-1C chain OS=Rattus norvegicus OX=10116 GN=Tuba1c PE=1 SV=1	23	0.779	1.162	0.732	0.838	0.842	1.632	0.982	1.205	1.14	0.814	-0.36	0.22	-0.45	-0.25	-0.25	0.71	-0.03	0.27	0.19	-0.3
A0A096MK68	ATP synthase subunit b OS=Rattus norvegicus OX=10116 GN=Atp5pb PE=1 SV=2	25	0.858	0.649	1.04	0.942	1.089	0.576	1.132	1.028	1.067	1.186	-0.22	-0.62	0.06	-0.09	0.12	-0.8	0.18	0.04	0.09	0.25
P14480	Fibrinogen beta chain OS=Rattus norvegicus OX=10116 GN=Fgb PE=1 SV=4	27	1.038	0.861	1.061	1.183	1.156	1.079	0.972	0.967	0.921	0.889	0.05	-0.22	0.08	0.24	0.21	0.11	-0.04	-0.05	-0.12	-0.17
P04785	Protein disulfide-isomerase OS=Rattus norvegicus OX=10116 GN=P4hb PE=1 SV=2	30	0.802	1.094	0.932	0.871	1.006	1.519	1.051	0.989	1.045	1.021	-0.32	0.13	-0.1	-0.2	0.01	0.6	0.07	-0.02	0.06	0.03
Q5XI34	Protein phosphatase 2 (Formerly 2A), regulatory subunit A (PR 65), alpha isoform, isoform CRA_a OS=Rattus norvegicus OX=10116 GN=Ppp2r1a PE=1 SV=1	30	0.912	0.935	0.958	0.971	1.029	0.907	1.011	1.014	1.019	1.005	-0.13	-0.1	-0.06	-0.04	0.04	-0.14	0.02	0.02	0.03	0.01
A0A8I6ANV9	Annexin OS=Rattus norvegicus OX=10116 GN=Anxa2 PE=1 SV=1	24	0.829	1.217	1.011	0.888	0.972	1.232	0.981	0.998	0.963	0.999	-0.27	0.28	0.02	-0.17	-0.04	0.3	-0.03	0	-0.05	0
A0A8I6GEP3	Tyrosine 3-monooxygenase/tryptophan 5-monooxygenase activation protein, epsilon OS=Rattus norvegicus OX=10116 GN=Ywhae PE=1 SV=1	21	1.364	1.278	1.019	1.245	1.143	1.305	0.973	1.15	1.047	0.995	0.45	0.35	0.03	0.32	0.19	0.38	-0.04	0.2	0.07	-0.01
Q68FU3	Electron transfer flavoprotein subunit beta OS=Rattus norvegicus OX=10116 GN=Etfb PE=1 SV=3	22	0.918	0.729	1.066	1.007	1.076	0.788	1.088	1.006	1.013	1.055	-0.12	-0.46	0.09	0.01	0.11	-0.34	0.12	0.01	0.02	0.08
A0A8I6AAP8	Microtubule-actin crosslinking factor 1 OS=Rattus norvegicus OX=10116 GN=Macf1 PE=1 SV=1	58	1.012	1.033	0.95	1.014	1.055	1.014	0.984	1.031	0.999	0.998	0.02	0.05	-0.07	0.02	0.08	0.02	-0.02	0.04	0	0
M0R629	Adenylosuccinate synthetase isozyme 1 OS=Rattus norvegicus OX=10116 GN=Adss1 PE=1 SV=1	26	0.912	0.764	1.11	1.121	1.125	0.695	1.078	1.085	1.007	1.086	-0.13	-0.39	0.15	0.17	0.17	-0.53	0.11	0.12	0.01	0.12
A0A8L2UPK2	Troponin T2, cardiac type OS=Rattus norvegicus OX=10116 GN=Tnnt2 PE=3 SV=1	19	1.001	0.781	1.056	1.003	1.026	0.673	1.056	1.043	1.077	1.108	0	-0.36	0.08	0	0.04	-0.57	0.08	0.06	0.11	0.15
F1LNF0	Myosin heavy chain 14 OS=Rattus norvegicus OX=10116 GN=Myh14 PE=1 SV=2	40	1.666	1.372	1.174	1.224	1.05	0.987	0.841	0.919	0.916	0.845	0.74	0.46	0.23	0.29	0.07	-0.02	-0.25	-0.12	-0.13	-0.24
Q4FZT9	26S proteasome non-ATPase regulatory subunit 2 OS=Rattus norvegicus OX=10116 GN=Psmd2 PE=1 SV=1	30	0.874	1.077	0.921	0.971	1.019	1.067	1.041	1.03	1.028	0.97	-0.19	0.11	-0.12	-0.04	0.03	0.09	0.06	0.04	0.04	-0.04
A0A8I5ZMM6	ATP synthase subunit O, mitochondrial OS=Rattus norvegicus OX=10116 GN=Atp5po PE=1 SV=1	20	0.873	0.678	1.039	0.945	1.076	0.612	1.055	0.939	0.999	1.058	-0.2	-0.56	0.05	-0.08	0.11	-0.71	0.08	-0.09	0	0.08
Q63704	Carnitine O-palmitoyltransferase 1, muscle isoform OS=Rattus norvegicus OX=10116 GN=Cpt1b PE=1 SV=1	28	0.692	0.66	1.083	0.738	0.907	0.745	0.993	0.905	1.076	1.386	-0.53	-0.6	0.11	-0.44	-0.14	-0.42	-0.01	-0.14	0.11	0.47
D4ACB8	T-complex protein 1 subunit theta OS=Rattus norvegicus OX=10116 GN=Cct8 PE=1 SV=1	32	0.925	1.077	0.977	0.996	1.023	1.034	1.046	1.056	1.056	1.003	-0.11	0.11	-0.03	-0.01	0.03	0.05	0.06	0.08	0.08	0
D3ZVQ0	Ubiquitin carboxyl-terminal hydrolase OS=Rattus norvegicus OX=10116 GN=Usp5 PE=1 SV=1	26	0.895	1.001	0.906	0.998	1.022	1.057	1.001	1.023	0.997	0.9	-0.16	0	-0.14	0	0.03	0.08	0	0.03	0	-0.15
P27139	Carbonic anhydrase 2 OS=Rattus norvegicus OX=10116 GN=Ca2 PE=1 SV=2	14	0.892	1.61	0.734	0.942	0.727	2.012	0.946	1.113	1.064	0.627	-0.17	0.69	-0.45	-0.09	-0.46	1.01	-0.08	0.15	0.09	-0.67
G3V9J1	Murinoglobulin 2 OS=Rattus norvegicus OX=10116 GN=Mug2 PE=1 SV=4	23	0.925	1.276	0.778	1.045	0.999	1.764	0.995	1.214	1.173	0.83	-0.11	0.35	-0.36	0.06	0	0.82	-0.01	0.28	0.23	-0.27
D4A3D2	RCG56113, isoform CRA_a OS=Rattus norvegicus OX=10116 GN=Smyd1 PE=4 SV=1	21	0.833	0.677	1.182	0.873	0.997	0.63	1.102	0.998	1.062	1.236	-0.26	-0.56	0.24	-0.2	0	-0.67	0.14	0	0.09	0.31
Q64591	2,4-dienoyl-CoA reductase [(3E)-enoyl-CoA-producing], mitochondrial OS=Rattus norvegicus OX=10116 GN=Decr1 PE=1 SV=2	21	0.851	0.805	0.998	1.014	1.077	0.803	1.022	0.981	0.961	1.036	-0.23	-0.31	0	0.02	0.11	-0.32	0.03	-0.03	-0.06	0.05
A0JPQ4	Tripartite motif-containing protein 72 OS=Rattus norvegicus OX=10116 GN=Trim72 PE=1 SV=1	25	1.191	0.636	1.142	1.095	1.104	0.595	1.082	0.942	1.049	1.046	0.25	-0.65	0.19	0.13	0.14	-0.75	0.11	-0.09	0.07	0.07
P07335	Creatine kinase B-type OS=Rattus norvegicus OX=10116 GN=Ckb PE=1 SV=2	18	0.966	1.267	0.929	0.994	0.966	1.393	1.008	1.024	0.993	0.965	-0.05	0.34	-0.11	-0.01	-0.05	0.48	0.01	0.03	-0.01	-0.05
G3V8B6	26S proteasome non-ATPase regulatory subunit 1 OS=Rattus norvegicus OX=10116 GN=Psmd1 PE=1 SV=1	27	0.93	1.042	0.947	0.961	1.033	0.949	1.012	0.989	1.019	0.964	-0.1	0.06	-0.08	-0.06	0.05	-0.08	0.02	-0.02	0.03	-0.05
G3V6P2	Dihydrolipoyllysine-residue succinyltransferase component of 2-oxoglutarate dehydrogenase complex, mitochondrial OS=Rattus norvegicus OX=10116 GN=Dlst PE=1 SV=1	19	1.042	0.798	1.097	1.052	1.113	0.746	1.113	1.015	1.038	1.054	0.06	-0.32	0.13	0.07	0.15	-0.42	0.15	0.02	0.05	0.08
O35244	Peroxiredoxin-6 OS=Rattus norvegicus OX=10116 GN=Prdx6 PE=1 SV=3	18	0.937	0.989	0.941	1.014	1.035	0.936	1.027	1.072	1.021	0.974	-0.09	-0.02	-0.09	0.02	0.05	-0.1	0.04	0.1	0.03	-0.04
Q5XIG1	Ldb3 protein OS=Rattus norvegicus OX=10116 GN=Ldb3 PE=2 SV=1	14	1.246	0.956	1.226	1.177	1.191	0.605	0.985	0.888	1.006	1.11	0.32	-0.06	0.29	0.24	0.25	-0.72	-0.02	-0.17	0.01	0.15
Q4V8I9	UTP--glucose-1-phosphate uridylyltransferase OS=Rattus norvegicus OX=10116 GN=Ugp2 PE=1 SV=1	26	0.872	0.753	0.985	0.939	1.037	0.829	1.041	0.96	1.054	1.032	-0.2	-0.41	-0.02	-0.09	0.05	-0.27	0.06	-0.06	0.08	0.05
P14604	Enoyl-CoA hydratase, mitochondrial OS=Rattus norvegicus OX=10116 GN=Echs1 PE=1 SV=1	18	1.02	0.843	1.07	1.064	1.036	0.75	1.068	0.969	1.01	1.055	0.03	-0.25	0.1	0.09	0.05	-0.42	0.1	-0.05	0.01	0.08
Q7TQ70	Fibrinogen alpha chain OS=Rattus norvegicus OX=10116 GN=Fga PE=1 SV=1	26	1.115	0.973	1.024	1.229	1.148	1.083	0.952	0.954	0.904	0.845	0.16	-0.04	0.03	0.3	0.2	0.11	-0.07	-0.07	-0.15	-0.24
P31977	Ezrin OS=Rattus norvegicus OX=10116 GN=Ezr PE=1 SV=3	34	0.837	0.886	0.978	1.018	1.027	0.9	1.017	1.089	1.023	1.049	-0.26	-0.17	-0.03	0.03	0.04	-0.15	0.02	0.12	0.03	0.07
P20788	Cytochrome b-c1 complex subunit Rieske, mitochondrial OS=Rattus norvegicus OX=10116 GN=Uqcrfs1 PE=1 SV=2	18	0.969	0.89	0.987	1.016	1.089	0.728	1.079	1.067	1.022	1.021	-0.04	-0.17	-0.02	0.02	0.12	-0.46	0.11	0.09	0.03	0.03
Q1JU68	Eukaryotic translation initiation factor 3 subunit A OS=Rattus norvegicus OX=10116 GN=Eif3a PE=2 SV=2	39	0.96	1.09	0.985	0.971	1.058	1.022	1.061	1.118	1.052	1.056	-0.06	0.12	-0.02	-0.04	0.08	0.03	0.09	0.16	0.07	0.08
A0A8L2Q170	ATP synthase subunit d, mitochondrial OS=Rattus norvegicus OX=10116 GN=Atp5pd PE=1 SV=1	16	0.951	0.734	1.028	0.96	1.07	0.613	1.093	1.009	1.061	1.128	-0.07	-0.45	0.04	-0.06	0.1	-0.71	0.13	0.01	0.09	0.17
Q6PDU7	ATP synthase subunit g, mitochondrial OS=Rattus norvegicus OX=10116 GN=Atp5mg PE=1 SV=2	11	0.698	0.647	0.906	0.831	1	0.606	0.938	0.825	0.886	0.926	-0.52	-0.63	-0.14	-0.27	0	-0.72	-0.09	-0.28	-0.17	-0.11
A0A0G2JV65	Tyrosine 3-monooxygenase/tryptophan 5-monooxygenase activation protein, zeta OS=Rattus norvegicus OX=10116 GN=Ywhaz PE=1 SV=2	24	0.825	0.928	0.926	0.91	1.017	1.108	0.972	0.943	0.962	1.017	-0.28	-0.11	-0.11	-0.14	0.02	0.15	-0.04	-0.09	-0.06	0.02
M0R757	Elongation factor 1-alpha OS=Rattus norvegicus OX=10116 GN=LOC100360413 PE=3 SV=1	24	0.793	1.588	0.826	0.857	0.876	1.908	0.923	0.957	0.946	0.904	-0.33	0.67	-0.28	-0.22	-0.19	0.93	-0.12	-0.06	-0.08	-0.15
A0A8I5ZUV1	Cytochrome c oxidase subunit 4 OS=Rattus norvegicus OX=10116 GN=Cox4i1 PE=1 SV=1	19	0.93	0.718	1.015	0.951	1.05	0.596	0.968	0.903	0.945	1.004	-0.1	-0.48	0.02	-0.07	0.07	-0.75	-0.05	-0.15	-0.08	0.01
D3ZZN3	Acetyl-coenzyme A synthetase OS=Rattus norvegicus OX=10116 GN=Acss1 PE=3 SV=1	23	0.991	0.811	1.039	1.005	1.05	0.702	1.045	1.013	1.033	1.094	-0.01	-0.3	0.06	0.01	0.07	-0.51	0.06	0.02	0.05	0.13
Q5RK08	Glioblastoma amplified sequence OS=Rattus norvegicus OX=10116 GN=Nipsnap2 PE=1 SV=1	17	0.725	0.715	1.023	0.926	1.054	0.712	1.065	0.984	1.022	1.1	-0.46	-0.48	0.03	-0.11	0.08	-0.49	0.09	-0.02	0.03	0.14
G3V615	C3/C5 convertase OS=Rattus norvegicus OX=10116 GN=Cfb PE=1 SV=1	27	0.851	1.315	0.847	0.928	0.853	1.804	0.929	1.075	0.997	0.803	-0.23	0.39	-0.24	-0.11	-0.23	0.85	-0.11	0.1	0	-0.32
B2RYM3	Inter-alpha trypsin inhibitor, heavy chain 1 (Predicted), isoform CRA_a OS=Rattus norvegicus OX=10116 GN=Itih1 PE=2 SV=1	23	0.875	1.419	0.781	0.966	0.853	1.632	1.006	1.064	1.067	0.786	-0.19	0.5	-0.36	-0.05	-0.23	0.71	0.01	0.09	0.09	-0.35
Q5RKI1	Eukaryotic initiation factor 4A-II OS=Rattus norvegicus OX=10116 GN=Eif4a2 PE=1 SV=1	23	0.898	0.928	0.992	0.992	1.054	0.9	1.048	1.001	1.047	1.089	-0.16	-0.11	-0.01	-0.01	0.08	-0.15	0.07	0	0.07	0.12
A0A8I6A163	Myosin XVIIIa OS=Rattus norvegicus OX=10116 GN=Myo18a PE=1 SV=1	39	1.025	1.013	1	0.99	1.016	0.985	1.021	1.072	1.123	1.051	0.04	0.02	0	-0.01	0.02	-0.02	0.03	0.1	0.17	0.07
Q9JKB7	Guanine deaminase OS=Rattus norvegicus OX=10116 GN=Gda PE=1 SV=1	26	0.824	1.538	0.81	1.018	0.827	1.896	0.942	1.12	0.992	0.794	-0.28	0.62	-0.3	0.03	-0.27	0.92	-0.09	0.16	-0.01	-0.33
A0A8I6B5J2	Acetyltransferase component of pyruvate dehydrogenase complex OS=Rattus norvegicus OX=10116 GN=Dlat-ps1 PE=3 SV=1	18	1.352	1.101	1.066	1.22	1.469	0.732	1.232	1.226	1.197	1.114	0.43	0.14	0.09	0.29	0.55	-0.45	0.3	0.29	0.26	0.16
A0A8L2QEN5	Sodium/potassium-transporting ATPase subunit alpha OS=Rattus norvegicus OX=10116 GN=Atp1a3 PE=3 SV=1	24	1.312	1.318	1.499	1.597	1.805	1.138	2.133	1.68	1.92	2.259	0.39	0.4	0.58	0.68	0.85	0.19	1.09	0.75	0.94	1.18
Q5BJQ0	Atypical kinase COQ8A, mitochondrial OS=Rattus norvegicus OX=10116 GN=Coq8a PE=2 SV=1	18	0.859	0.935	0.962	0.932	1.055	0.931	1.02	1.06	1.024	1.035	-0.22	-0.1	-0.06	-0.1	0.08	-0.1	0.03	0.08	0.03	0.05
P0DMW0	Heat shock 70 kDa protein 1A OS=Rattus norvegicus OX=10116 GN=Hspa1a PE=2 SV=1	28	0.912	1.131	0.881	0.98	0.969	1.321	1.009	1.066	1.055	0.956	-0.13	0.18	-0.18	-0.03	-0.04	0.4	0.01	0.09	0.08	-0.06
D3ZUL3	Collagen type VI alpha 1 chain OS=Rattus norvegicus OX=10116 GN=Col6a1 PE=1 SV=2	27	1.051	0.97	1.111	1.033	1.037	1.046	0.847	0.996	0.962	0.956	0.07	-0.04	0.15	0.05	0.05	0.06	-0.24	-0.01	-0.06	-0.06
A0A8I6ADM7	PDZ and LIM domain 5 OS=Rattus norvegicus OX=10116 GN=Pdlim5 PE=1 SV=1	20	0.917	0.828	1.076	0.927	0.99	0.865	0.979	0.929	0.988	1.169	-0.12	-0.27	0.11	-0.11	-0.01	-0.21	-0.03	-0.11	-0.02	0.23
G3V7E8	Cullin-associated and neddylation-dissociated 2 (Putative), isoform CRA_b OS=Rattus norvegicus OX=10116 GN=Cand2 PE=3 SV=3	30	1.117	0.923	1.074	1.039	1.105	0.767	1.051	1.062	1.041	1.037	0.16	-0.12	0.1	0.06	0.14	-0.38	0.07	0.09	0.06	0.05
F1LM84	Nidogen 1 OS=Rattus norvegicus OX=10116 GN=Nid1 PE=1 SV=2	26	1.214	1.234	1.079	1.114	1.043	0.935	0.919	0.971	0.922	0.9	0.28	0.3	0.11	0.16	0.06	-0.1	-0.12	-0.04	-0.12	-0.15
D4ADS4	Microsomal glutathione S-transferase 3 OS=Rattus norvegicus OX=10116 GN=Mgst3 PE=1 SV=1	13	0.712	0.582	0.917	0.808	1.051	0.548	0.889	0.798	0.889	0.895	-0.49	-0.78	-0.13	-0.31	0.07	-0.87	-0.17	-0.32	-0.17	-0.16
A0A8I6G8B0	aldehyde dehydrogenase (NAD(+)) OS=Rattus norvegicus OX=10116 GN=Aldh7a1 PE=1 SV=1	23	0.913	0.87	0.98	0.995	1.016	0.991	1.021	0.978	0.99	1.007	-0.13	-0.2	-0.03	-0.01	0.02	-0.01	0.03	-0.03	-0.01	0.01
A0A0G2KAQ5	Myozenin 2 OS=Rattus norvegicus OX=10116 GN=Myoz2 PE=1 SV=1	20	1.12	0.897	1.06	1.016	1.124	0.722	1.075	1.008	1.046	1.085	0.16	-0.16	0.08	0.02	0.17	-0.47	0.1	0.01	0.06	0.12
A0A8I5ZLJ2	Succinate-semialdehyde dehydrogenase, mitochondrial OS=Rattus norvegicus OX=10116 GN=Aldh5a1 PE=1 SV=1	24	1.113	0.698	1.059	1.032	1.07	0.709	1.038	0.947	0.97	1.017	0.15	-0.52	0.08	0.05	0.1	-0.5	0.05	-0.08	-0.04	0.02
P50137	Transketolase OS=Rattus norvegicus OX=10116 GN=Tkt PE=1 SV=1	23	0.769	1.386	0.737	0.908	0.822	2.95	0.914	0.997	0.874	0.76	-0.38	0.47	-0.44	-0.14	-0.28	1.56	-0.13	0	-0.19	-0.4
P08010	Glutathione S-transferase Mu 2 OS=Rattus norvegicus OX=10116 GN=Gstm2 PE=1 SV=2	21	0.954	0.964	1.011	1.053	1.058	0.962	1.025	1	0.966	0.983	-0.07	-0.05	0.02	0.07	0.08	-0.06	0.04	0	-0.05	-0.03
A0A8J8YGG0	ATP synthase subunit gamma OS=Rattus norvegicus OX=10116 GN=Atp5f1c PE=1 SV=1	19	0.851	0.676	1.014	0.925	1.077	0.639	1.084	0.994	1.037	1.072	-0.23	-0.56	0.02	-0.11	0.11	-0.65	0.12	-0.01	0.05	0.1
P12007	Isovaleryl-CoA dehydrogenase, mitochondrial OS=Rattus norvegicus OX=10116 GN=Ivd PE=1 SV=2	20	0.938	0.793	0.996	1.01	1.046	0.719	1.081	0.991	1.016	1.05	-0.09	-0.34	-0.01	0.01	0.06	-0.48	0.11	-0.01	0.02	0.07
Q5PQK5	Radixin OS=Rattus norvegicus OX=10116 GN=Rdx PE=1 SV=1	35	0.995	0.902	1.022	1.053	1.053	1.004	0.988	0.985	0.965	1.006	-0.01	-0.15	0.03	0.07	0.07	0.01	-0.02	-0.02	-0.05	0.01
F1M7K3	Myosin light chain 7 OS=Rattus norvegicus OX=10116 GN=Myl7 PE=4 SV=3	13	0.562	4.707	0.591	0.886	0.586	2.771	0.584	0.773	0.579	0.504	-0.83	2.23	-0.76	-0.17	-0.77	1.47	-0.78	-0.37	-0.79	-0.99
A0A8I6AK15	Malic enzyme OS=Rattus norvegicus OX=10116 GN=Me3 PE=3 SV=1	29	1.074	0.751	1.034	1.028	1.077	0.625	1.053	0.974	0.999	1.042	0.1	-0.41	0.05	0.04	0.11	-0.68	0.07	-0.04	0	0.06
M0R7H7	Glyceraldehyde 3-phosphate dehydrogenase NAD(P) binding domain-containing protein OS=Rattus norvegicus OX=10116 GN=AABR07058366.1 PE=3 SV=3	13	0.72	0.529	1.139	0.776	0.942	0.638	1.136	0.82	1.074	1.76	-0.47	-0.92	0.19	-0.37	-0.09	-0.65	0.18	-0.29	0.1	0.82
P27881	Hexokinase-2 OS=Rattus norvegicus OX=10116 GN=Hk2 PE=1 SV=1	28	0.977	0.774	1.045	0.916	1.057	0.791	1.12	0.983	1.131	1.097	-0.03	-0.37	0.06	-0.13	0.08	-0.34	0.16	-0.03	0.18	0.13
A0A0G2K1F2	acetyl-CoA carboxylase OS=Rattus norvegicus OX=10116 GN=Acacb PE=1 SV=2	39	0.907	0.967	0.991	0.946	1.002	0.959	1.045	1.01	1.03	0.956	-0.14	-0.05	-0.01	-0.08	0	-0.06	0.06	0.02	0.04	-0.06
A0A8I5ZN97	Tubulin alpha chain OS=Rattus norvegicus OX=10116 GN=Tuba8 PE=1 SV=1	23	0.9	0.553	1.004	0.94	1.108	0.51	1.081	1.07	1.151	1.064	-0.15	-0.86	0.01	-0.09	0.15	-0.97	0.11	0.1	0.2	0.09
A0A8J8XAN4	ADP-ribosylhydrolase like 1 OS=Rattus norvegicus OX=10116 GN=Grtp1 PE=3 SV=1	30	0.946	0.698	1.129	0.971	1.044	0.638	1.089	0.915	1.022	1.089	-0.08	-0.52	0.18	-0.04	0.06	-0.65	0.12	-0.13	0.03	0.12
P18418	Calreticulin OS=Rattus norvegicus OX=10116 GN=Calr PE=1 SV=1	25	0.859	1.414	0.886	0.974	0.957	1.505	0.963	0.961	0.962	0.927	-0.22	0.5	-0.17	-0.04	-0.06	0.59	-0.05	-0.06	-0.06	-0.11
A0A8I5Y747	Nucleolin OS=Rattus norvegicus OX=10116 GN=Ncl PE=1 SV=1	32	0.939	0.935	1.006	1.017	1.048	0.973	1.031	1.013	1.019	1.096	-0.09	-0.1	0.01	0.02	0.07	-0.04	0.04	0.02	0.03	0.13
O35814	Stress-induced-phosphoprotein 1 OS=Rattus norvegicus OX=10116 GN=Stip1 PE=1 SV=1	32	0.837	1.161	0.926	0.929	0.997	1.314	1.023	1.035	1.025	0.975	-0.26	0.22	-0.11	-0.11	0	0.39	0.03	0.05	0.04	-0.04
P16290	Phosphoglycerate mutase 2 OS=Rattus norvegicus OX=10116 GN=Pgam2 PE=1 SV=2	17	0.892	1.073	1.045	1.03	1.001	1.118	1.046	1.03	0.985	1.066	-0.17	0.1	0.06	0.04	0	0.16	0.07	0.04	-0.02	0.09
A0A8I5ZYK1	Synaptopodin 2 OS=Rattus norvegicus OX=10116 GN=Synpo2 PE=1 SV=1	27	1.132	0.999	0.993	1.066	1.02	1.058	0.916	1.063	1.002	0.942	0.18	0	-0.01	0.09	0.03	0.08	-0.13	0.09	0	-0.09
Q4QRB4	Tubulin beta-3 chain OS=Rattus norvegicus OX=10116 GN=Tubb3 PE=1 SV=1	15	0.898	1.231	0.917	0.934	0.963	1.286	1.003	1.059	1.02	0.97	-0.16	0.3	-0.12	-0.1	-0.05	0.36	0	0.08	0.03	-0.04
P20059	Hemopexin OS=Rattus norvegicus OX=10116 GN=Hpx PE=1 SV=3	26	0.906	1.426	0.799	0.967	0.845	1.942	0.925	1.025	1.004	0.787	-0.14	0.51	-0.32	-0.05	-0.24	0.96	-0.11	0.04	0.01	-0.35
A0A8I6G699	FERM domain containing kindlin 2 OS=Rattus norvegicus OX=10116 GN=Fermt2 PE=1 SV=1	24	0.753	0.827	1.021	0.916	1.016	1.005	1.056	0.98	1.043	1.094	-0.41	-0.27	0.03	-0.13	0.02	0.01	0.08	-0.03	0.06	0.13
A0A8I6GLZ5	PBX homeobox interacting protein 1 OS=Rattus norvegicus OX=10116 GN=Pbxip1 PE=1 SV=1	22	0.915	1.411	0.92	0.95	0.955	1.196	0.988	0.994	0.963	0.995	-0.13	0.5	-0.12	-0.07	-0.07	0.26	-0.02	-0.01	-0.05	-0.01
Q6AXV4	Sorting and assembly machinery component 50 homolog OS=Rattus norvegicus OX=10116 GN=Samm50 PE=1 SV=1	24	0.951	0.797	1.063	0.995	1.014	0.745	1.046	1.001	1.021	1.09	-0.07	-0.33	0.09	-0.01	0.02	-0.43	0.06	0	0.03	0.12
B4F768	Multifunctional fusion protein (Fragment) OS=Rattus norvegicus OX=10116 GN=Aldh4a1 PE=2 SV=1	24	0.898	0.951	0.996	0.987	0.966	0.825	1.019	1.039	1.019	1.048	-0.15	-0.07	-0.01	-0.02	-0.05	-0.28	0.03	0.05	0.03	0.07
D3ZRN3	Actin, beta-like 2 OS=Rattus norvegicus OX=10116 GN=Actbl2 PE=1 SV=1	15	0.849	0.623	0.804	0.759	1.167	0.543	0.821	0.743	0.791	0.694	-0.24	-0.68	-0.32	-0.4	0.22	-0.88	-0.28	-0.43	-0.34	-0.53
P02651	Apolipoprotein A-IV OS=Rattus norvegicus OX=10116 GN=Apoa4 PE=1 SV=2	24	0.831	1.091	0.804	0.813	0.842	2.037	1.035	1.197	1.05	0.821	-0.27	0.13	-0.32	-0.3	-0.25	1.03	0.05	0.26	0.07	-0.29
A0A8I6A144	RCG62531, isoform CRA_c OS=Rattus norvegicus OX=10116 GN=Tpm3 PE=1 SV=1	24	1.014	1.338	0.911	0.946	1.035	1.062	0.949	1.129	1.206	0.934	0.02	0.42	-0.13	-0.08	0.05	0.09	-0.08	0.17	0.27	-0.1
Q8R3Z7	EH-domain containing 4 OS=Rattus norvegicus OX=10116 GN=Ehd4 PE=1 SV=1	29	0.925	1.159	0.957	0.938	0.993	0.987	1.024	1.015	1.05	1.026	-0.11	0.21	-0.06	-0.09	-0.01	-0.02	0.03	0.02	0.07	0.04
F1LNF7	Isocitrate dehydrogenase [NAD] subunit, mitochondrial OS=Rattus norvegicus OX=10116 GN=Idh3a PE=3 SV=3	17	0.952	0.958	1.028	1.024	0.996	0.957	1.008	1.247	0.983	1.116	-0.07	-0.06	0.04	0.03	-0.01	-0.06	0.01	0.32	-0.02	0.16
A0A0H2UI21	Carnitine O-acetyltransferase OS=Rattus norvegicus OX=10116 GN=Crat PE=1 SV=2	27	0.819	0.651	1.07	1.002	1.063	0.627	1.086	1.049	1.027	1.093	-0.29	-0.62	0.1	0	0.09	-0.67	0.12	0.07	0.04	0.13
A0A8I6A6H8	Serpin family B member 6A OS=Rattus norvegicus OX=10116 GN=Serpinb6a PE=1 SV=1	19	0.782	1.045	0.998	0.886	1.008	1.174	1.055	1.048	1.029	1.089	-0.35	0.06	0	-0.17	0.01	0.23	0.08	0.07	0.04	0.12
G3V6S5	C-1-tetrahydrofolate synthase, cytoplasmic OS=Rattus norvegicus OX=10116 GN=Mthfd1 PE=1 SV=1	30	0.829	1.026	0.942	0.982	1.01	1.163	1.047	1.075	1.041	1.012	-0.27	0.04	-0.09	-0.03	0.01	0.22	0.07	0.1	0.06	0.02
Q5FVG5	Similar to tropomyosin 1, embryonic fibroblast-rat, isoform CRA_c OS=Rattus norvegicus OX=10116 GN=Tpm2 PE=2 SV=1	23	0.946	1.83	0.747	0.789	0.843	2.597	0.962	1.134	0.9	0.889	-0.08	0.87	-0.42	-0.34	-0.25	1.38	-0.06	0.18	-0.15	-0.17
M0RD03	Eukaryotic translation initiation factor 4 gamma, 1 OS=Rattus norvegicus OX=10116 GN=Eif4g1 PE=1 SV=2	31	0.94	0.988	1.001	0.994	1.049	0.89	1.002	1.011	1.027	1.064	-0.09	-0.02	0	-0.01	0.07	-0.17	0	0.02	0.04	0.09
A0A0G2JU23	Apolipoprotein A1 OS=Rattus norvegicus OX=10116 GN=Apoa1 PE=1 SV=2	18	0.896	1.364	0.841	0.931	0.81	1.979	0.936	1.246	0.988	0.716	-0.16	0.45	-0.25	-0.1	-0.3	0.98	-0.1	0.32	-0.02	-0.48
F1LN92	AFG3 like matrix AAA peptidase subunit 2 OS=Rattus norvegicus OX=10116 GN=Afg3l2 PE=1 SV=1	35	0.93	0.831	1.007	0.98	1.028	0.778	1.08	1.031	1.055	1.077	-0.11	-0.27	0.01	-0.03	0.04	-0.36	0.11	0.04	0.08	0.11
A0A8L2QEP8	Heterogeneous nuclear ribonucleoprotein K OS=Rattus norvegicus OX=10116 GN=Hnrnpk PE=1 SV=1	22	1.341	1.943	0.961	1.986	1.577	1.388	1.22	1.937	1.004	0.796	0.42	0.96	-0.06	0.99	0.66	0.47	0.29	0.95	0.01	-0.33
A0A8L2R8U1	Tripeptidyl-peptidase 2 OS=Rattus norvegicus OX=10116 GN=Tpp2 PE=1 SV=1	32	0.964	1.241	0.891	1.031	0.974	1.124	0.986	1.056	1.031	0.924	-0.05	0.31	-0.17	0.04	-0.04	0.17	-0.02	0.08	0.04	-0.11
Q5D059	Heterogeneous nuclear ribonucleoprotein K OS=Rattus norvegicus OX=10116 GN=Hnrnpk PE=1 SV=1	22	0.976	1.333	0.961	1.019	0.967	0.974	1.023	1.006	1.003	0.989	-0.04	0.42	-0.06	0.03	-0.05	-0.04	0.03	0.01	0	-0.02
F1LQN3	Reticulon OS=Rattus norvegicus OX=10116 GN=Rtn4 PE=1 SV=2	25	1.025	1.08	0.972	1.001	1.015	0.818	1.002	1.019	1.042	1.082	0.04	0.11	-0.04	0	0.02	-0.29	0	0.03	0.06	0.11
P68511	14-3-3 protein eta OS=Rattus norvegicus OX=10116 GN=Ywhah PE=1 SV=2	18	0.905	1.084	0.994	0.998	1.041	1.069	1.035	0.976	0.994	1.069	-0.14	0.12	-0.01	0	0.06	0.1	0.05	-0.04	-0.01	0.1
Q68FQ0	T-complex protein 1 subunit epsilon OS=Rattus norvegicus OX=10116 GN=Cct5 PE=1 SV=1	26	0.898	1.048	0.935	0.971	0.978	1.116	1.008	1.041	0.994	0.97	-0.15	0.07	-0.1	-0.04	-0.03	0.16	0.01	0.06	-0.01	-0.04
Q66HP8	Solute carrier family 25 (Carnitine/acylcarnitine translocase), member 20 OS=Rattus norvegicus OX=10116 GN=Slc25a20 PE=1 SV=1	21	0.682	0.546	1.047	0.774	0.992	0.609	1.001	0.894	1.016	1.162	-0.55	-0.87	0.07	-0.37	-0.01	-0.72	0	-0.16	0.02	0.22
F1LW91	Nuclear mitotic apparatus protein 1 OS=Rattus norvegicus OX=10116 GN=Numa1 PE=1 SV=3	36	0.914	1.151	0.964	0.956	1.014	1.22	0.998	1.051	1.043	1.05	-0.13	0.2	-0.05	-0.07	0.02	0.29	0	0.07	0.06	0.07
P85125	Caveolae-associated protein 1 OS=Rattus norvegicus OX=10116 GN=Cavin1 PE=1 SV=1	19	0.998	1.089	1.007	1.005	1.061	0.998	1.042	0.992	0.991	1.037	0	0.12	0.01	0.01	0.09	0	0.06	-0.01	-0.01	0.05
A0A8I6GMC5	Nicotinamide phosphoribosyltransferase OS=Rattus norvegicus OX=10116 GN=Nampt PE=1 SV=1	25	0.924	0.76	1.038	1.03	1.099	0.816	1.075	0.983	1.05	1.069	-0.11	-0.4	0.05	0.04	0.14	-0.29	0.1	-0.02	0.07	0.1
A0A8I5ZJL1	Myosin heavy chain 10 OS=Rattus norvegicus OX=10116 GN=Myh10 PE=1 SV=1	36	1.096	1.151	0.835	0.965	1.003	1.294	0.889	0.967	0.855	0.824	0.13	0.2	-0.26	-0.05	0	0.37	-0.17	-0.05	-0.23	-0.28
B1WBN3	2-oxoisovalerate dehydrogenase subunit alpha OS=Rattus norvegicus OX=10116 GN=Bckdha PE=2 SV=1	20	1	0.842	1.026	1.044	1.093	0.779	1.097	1.037	1.018	1.052	0	-0.25	0.04	0.06	0.13	-0.36	0.13	0.05	0.03	0.07
Q6AY07	Fructose-bisphosphate aldolase OS=Rattus norvegicus OX=10116 GN=Aldoart2 PE=2 SV=1	18	1.21	0.678	1.58	1.364	2.653	1.138	1.542	2.333	1.351	1.226	0.27	-0.56	0.66	0.45	1.41	0.19	0.62	1.22	0.43	0.29
Q3KRF2	High density lipoprotein binding protein OS=Rattus norvegicus OX=10116 GN=Hdlbp PE=1 SV=1	31	0.956	1.185	0.93	0.969	0.973	1.157	0.966	1.09	1.052	0.992	-0.07	0.24	-0.1	-0.05	-0.04	0.21	-0.05	0.12	0.07	-0.01
Q6P6U2	Proteasome (Prosome, macropain) 26S subunit, ATPase 3 OS=Rattus norvegicus OX=10116 GN=Psmc3 PE=1 SV=1	21	0.883	1.03	0.98	0.958	0.991	1.086	1.02	1.028	1.015	1.003	-0.18	0.04	-0.03	-0.06	-0.01	0.12	0.03	0.04	0.02	0
G3V8A5	Vacuolar protein sorting-associated protein 35 OS=Rattus norvegicus OX=10116 GN=Vps35 PE=1 SV=1	27	0.796	0.905	0.964	0.899	0.955	0.995	0.97	0.95	1.011	1.062	-0.33	-0.14	-0.05	-0.15	-0.07	-0.01	-0.04	-0.07	0.02	0.09
Q156J1	Bcl-2-interacting death suppressor OS=Rattus norvegicus OX=10116 PE=2 SV=1	19	1.178	0.835	1.02	0.98	1.097	0.706	0.945	1.095	1.028	1.111	0.24	-0.26	0.03	-0.03	0.13	-0.5	-0.08	0.13	0.04	0.15
B2GV15	Dihydrolipoamide acetyltransferase component of pyruvate dehydrogenase complex OS=Rattus norvegicus OX=10116 GN=Dbt PE=1 SV=1	23	0.933	0.758	1.022	1.001	1.046	0.79	1.102	1.033	1.047	1.052	-0.1	-0.4	0.03	0	0.06	-0.34	0.14	0.05	0.07	0.07
Q07009	Calpain-2 catalytic subunit OS=Rattus norvegicus OX=10116 GN=Capn2 PE=1 SV=3	25	0.948	0.911	0.975	1.031	1.088	1.004	1.05	1.01	1.034	0.982	-0.08	-0.13	-0.04	0.04	0.12	0.01	0.07	0.01	0.05	-0.03
A0A8I6A8L3	Aspartyl aminopeptidase OS=Rattus norvegicus OX=10116 GN=Dnpep PE=1 SV=1	18	0.973	1.066	0.969	1.058	1.02	1.044	1.119	1.03	1.072	1.019	-0.04	0.09	-0.05	0.08	0.03	0.06	0.16	0.04	0.1	0.03
A0A8L2QAQ2	Triosephosphate isomerase OS=Rattus norvegicus OX=10116 GN=Tpi1 PE=1 SV=1	17	0.931	0.742	1.092	1.004	1.049	0.823	1.058	0.973	1.014	1.115	-0.1	-0.43	0.13	0.01	0.07	-0.28	0.08	-0.04	0.02	0.16
P09006	Serine protease inhibitor A3N OS=Rattus norvegicus OX=10116 GN=Serpina3n PE=1 SV=3	20	0.977	1.399	0.891	1.022	0.948	1.401	0.952	1.112	1.029	0.821	-0.03	0.48	-0.17	0.03	-0.08	0.49	-0.07	0.15	0.04	-0.29
D3ZE15	NADH dehydrogenase [ubiquinone] 1 alpha subcomplex subunit 13 OS=Rattus norvegicus OX=10116 GN=Ndufa13 PE=3 SV=2	13	0.928	0.763	1.004	0.969	1.079	0.661	1.075	0.966	0.996	1.024	-0.11	-0.39	0.01	-0.04	0.11	-0.6	0.1	-0.05	-0.01	0.03
P56571	ES1 protein homolog, mitochondrial OS=Rattus norvegicus OX=10116 PE=1 SV=2	14	0.942	0.752	1.089	0.958	1.054	0.69	1.136	1.036	1.062	1.154	-0.09	-0.41	0.12	-0.06	0.08	-0.54	0.18	0.05	0.09	0.21
P97536	Cullin-associated NEDD8-dissociated protein 1 OS=Rattus norvegicus OX=10116 GN=Cand1 PE=1 SV=1	29	0.812	1.025	0.952	0.88	0.98	1.101	1.024	1.01	1.063	1.06	-0.3	0.04	-0.07	-0.19	-0.03	0.14	0.03	0.01	0.09	0.08
F1LQS6	Xanthine dehydrogenase/oxidase OS=Rattus norvegicus OX=10116 GN=Xdh PE=1 SV=2	27	0.837	0.9	0.934	0.989	1.001	1.049	1.026	0.962	1.023	1.001	-0.26	-0.15	-0.1	-0.02	0	0.07	0.04	-0.06	0.03	0
P50398	Rab GDP dissociation inhibitor alpha OS=Rattus norvegicus OX=10116 GN=Gdi1 PE=1 SV=1	20	1.142	1.219	1.014	1.028	1.02	1.154	1.046	1.002	1.027	1.039	0.19	0.29	0.02	0.04	0.03	0.21	0.07	0	0.04	0.05
Q6PCU0	ATP synthase subunit gamma OS=Rattus norvegicus OX=10116 GN=Atp5f1c PE=2 SV=1	18	0.836	0.967	0.979	1.052	1.269	1.069	1.03	1.052	1.095	1.046	-0.26	-0.05	-0.03	0.07	0.34	0.1	0.04	0.07	0.13	0.07
Q04462	Valine--tRNA ligase OS=Rattus norvegicus OX=10116 GN=Vars1 PE=2 SV=2	26	0.962	1.121	0.918	0.998	0.982	1.006	1.011	1.007	1.018	0.964	-0.06	0.16	-0.12	0	-0.03	0.01	0.02	0.01	0.03	-0.05
Q5RKI0	WD repeat-containing protein 1 OS=Rattus norvegicus OX=10116 GN=Wdr1 PE=1 SV=3	28	0.94	1.069	0.968	1.029	1.014	1.168	1.006	1.007	0.964	0.957	-0.09	0.1	-0.05	0.04	0.02	0.22	0.01	0.01	-0.05	-0.06
P07483	Fatty acid-binding protein, heart OS=Rattus norvegicus OX=10116 GN=Fabp3 PE=1 SV=2	15	0.987	0.563	0.989	1.117	1.157	0.546	1.101	1.032	1.025	1.054	-0.02	-0.83	-0.02	0.16	0.21	-0.87	0.14	0.05	0.04	0.08
A0A8I6GCL3	Caldesmon 1 OS=Rattus norvegicus OX=10116 GN=Cald1 PE=1 SV=1	28	0.767	1.194	0.745	0.826	0.82	3.214	0.829	1.035	0.819	0.798	-0.38	0.26	-0.42	-0.28	-0.29	1.68	-0.27	0.05	-0.29	-0.33
A0A8I6GMK2	Tyrosine 3-monooxygenase/tryptophan 5-monooxygenase activation protein, beta OS=Rattus norvegicus OX=10116 GN=Ywhab PE=1 SV=1	19	0.91	0.981	0.985	0.987	1.021	1.14	1.008	1.026	1.041	1.038	-0.14	-0.03	-0.02	-0.02	0.03	0.19	0.01	0.04	0.06	0.05
Q68FT1	Ubiquinone biosynthesis protein COQ9, mitochondrial OS=Rattus norvegicus OX=10116 GN=Coq9 PE=1 SV=2	10	0.96	0.914	1.004	1.061	1.095	0.834	1.047	1.058	0.997	0.995	-0.06	-0.13	0.01	0.09	0.13	-0.26	0.07	0.08	0	-0.01
P41562	Isocitrate dehydrogenase [NADP] cytoplasmic OS=Rattus norvegicus OX=10116 GN=Idh1 PE=1 SV=1	20	0.965	0.823	1.021	1.012	1.086	0.875	1.027	0.934	1.004	1.024	-0.05	-0.28	0.03	0.02	0.12	-0.19	0.04	-0.1	0.01	0.03
F1LQI5	Ubiquitin protein ligase E3 component n-recognin 4 OS=Rattus norvegicus OX=10116 GN=Ubr4 PE=1 SV=1	32	0.917	1.113	0.896	1.043	1.034	1.031	1.003	1.047	1.021	0.987	-0.12	0.15	-0.16	0.06	0.05	0.04	0	0.07	0.03	-0.02
F7ELS2	Chaperonin containing TCP1 subunit 6A OS=Rattus norvegicus OX=10116 GN=Cct6a PE=1 SV=1	25	0.891	1.071	1.017	0.995	0.997	1.176	1.036	1.082	1.03	1.043	-0.17	0.1	0.02	-0.01	0	0.23	0.05	0.11	0.04	0.06
A0A8I5ZTN5	Adenylosuccinate lyase OS=Rattus norvegicus OX=10116 GN=Adsl PE=1 SV=1	18	0.863	0.901	0.919	1.023	1.044	0.954	1.039	1.003	1.029	1.035	-0.21	-0.15	-0.12	0.03	0.06	-0.07	0.06	0	0.04	0.05
A0A8L2R7J3	AP complex subunit beta OS=Rattus norvegicus OX=10116 GN=Ap2b1 PE=1 SV=1	24	1.05	1.421	0.855	0.988	0.957	0.941	0.958	1.01	0.965	0.876	0.07	0.51	-0.23	-0.02	-0.06	-0.09	-0.06	0.01	-0.05	-0.19
F1LM42	Ankyrin 2 OS=Rattus norvegicus OX=10116 GN=Ank2 PE=1 SV=4	29	1.262	1.043	1.038	1.065	1.026	0.841	1.011	1.065	1.045	1.011	0.34	0.06	0.05	0.09	0.04	-0.25	0.02	0.09	0.06	0.02
D3Z9D2	FYVE and coiled-coil domain autophagy adaptor 1 OS=Rattus norvegicus OX=10116 GN=Fyco1 PE=1 SV=1	29	1.031	1.091	1.009	1.086	1.132	1.05	1.161	1.164	1.107	1.231	0.04	0.13	0.01	0.12	0.18	0.07	0.22	0.22	0.15	0.3
Q4QR73	DnaJ (Hsp40) homolog, subfamily A, member 4 OS=Rattus norvegicus OX=10116 GN=Dnaja4 PE=1 SV=1	20	0.977	0.896	0.976	0.972	1.016	0.753	1.016	0.959	1.051	1.096	-0.03	-0.16	-0.03	-0.04	0.02	-0.41	0.02	-0.06	0.07	0.13
F1M7L9	Plakophilin-2 OS=Rattus norvegicus OX=10116 GN=Pkp2 PE=1 SV=4	27	0.892	0.774	1.063	0.839	1.037	0.651	1.057	0.964	1.079	1.064	-0.16	-0.37	0.09	-0.25	0.05	-0.62	0.08	-0.05	0.11	0.09
Q5RJR9	Serpin H1 OS=Rattus norvegicus OX=10116 GN=Serpinh1 PE=1 SV=1	18	0.922	1.329	0.869	0.966	0.752	1.328	1	1.033	0.962	0.834	-0.12	0.41	-0.2	-0.05	-0.41	0.41	0	0.05	-0.06	-0.26
P28480	T-complex protein 1 subunit alpha OS=Rattus norvegicus OX=10116 GN=Tcp1 PE=1 SV=1	23	0.896	1.008	0.975	0.985	1.026	0.971	1.008	0.998	1.018	1.039	-0.16	0.01	-0.04	-0.02	0.04	-0.04	0.01	0	0.03	0.06
A0A0G2K151	Apolipoprotein E OS=Rattus norvegicus OX=10116 GN=Apoe PE=1 SV=1	17	0.895	1.795	0.726	1.01	0.866	2.146	0.908	1.248	0.975	0.679	-0.16	0.84	-0.46	0.02	-0.21	1.1	-0.14	0.32	-0.04	-0.56
A0A387KC71	Aldo-keto reductase family 1, member C15 OS=Rattus norvegicus OX=10116 GN=Akr1c15 PE=2 SV=1	18	0.938	0.73	1.059	1.062	1.09	0.715	1.102	0.948	1.052	1.129	-0.09	-0.45	0.08	0.09	0.12	-0.48	0.14	-0.08	0.07	0.18
P29457	Serpin H1 OS=Rattus norvegicus OX=10116 GN=Serpinh1 PE=1 SV=1	18	0.959	0.961	0.921	0.861	1.025	1.201	0.999	0.966	1.025	1.026	-0.06	-0.06	-0.12	-0.22	0.04	0.26	0	-0.05	0.04	0.04
A0A8L2QEL3	Heterogeneous nuclear ribonucleoprotein L OS=Rattus norvegicus OX=10116 GN=Hnrnpl PE=1 SV=1	16	0.893	1.025	0.958	0.978	0.999	1.071	1.055	1.065	1.016	1.002	-0.16	0.04	-0.06	-0.03	0	0.1	0.08	0.09	0.02	0
D4A781	Importin 5 OS=Rattus norvegicus OX=10116 GN=Ipo5 PE=1 SV=1	24	0.918	1.103	0.883	0.987	0.981	0.921	0.998	0.947	0.968	0.92	-0.12	0.14	-0.18	-0.02	-0.03	-0.12	0	-0.08	-0.05	-0.12
Q6P502	T-complex protein 1 subunit gamma OS=Rattus norvegicus OX=10116 GN=Cct3 PE=1 SV=1	25	0.886	1.003	0.992	1.022	1.049	1.062	1.062	1.048	1.03	1.029	-0.18	0	-0.01	0.03	0.07	0.09	0.09	0.07	0.04	0.04
Q5U2U8	BAG cochaperone 3 OS=Rattus norvegicus OX=10116 GN=Bag3 PE=1 SV=1	19	1.193	0.863	1.031	0.981	1.048	0.797	0.982	1.024	1.002	1.057	0.26	-0.21	0.04	-0.03	0.07	-0.33	-0.03	0.03	0	0.08
P16409	Myosin light chain 3 OS=Rattus norvegicus OX=10116 GN=Myl3 PE=1 SV=2	17	1.753	0.646	1.711	1.389	1.161	0.589	0.737	0.701	0.667	0.998	0.81	-0.63	0.77	0.47	0.21	-0.76	-0.44	-0.51	-0.58	0
Q6P9V7	Proteasome (Prosome, macropain) activator subunit 1 OS=Rattus norvegicus OX=10116 GN=Psme1 PE=1 SV=1	18	0.836	0.821	0.906	0.955	1.068	0.873	1.068	1.046	1.084	1.011	-0.26	-0.28	-0.14	-0.07	0.1	-0.2	0.09	0.07	0.12	0.02
F7F7A6	ATP-dependent RNA helicase OS=Rattus norvegicus OX=10116 GN=Eif4a1 PE=1 SV=1	21	0.962	1.141	0.925	0.976	0.99	1.146	0.992	1.05	1.032	0.957	-0.06	0.19	-0.11	-0.04	-0.01	0.2	-0.01	0.07	0.05	-0.06
A0A8I5ZTF9	Aldo-keto reductase family 1 member B OS=Rattus norvegicus OX=10116 GN=Akr1b1 PE=1 SV=1	22	0.853	0.774	1.07	0.966	0.997	0.886	1.051	0.926	1.023	1.124	-0.23	-0.37	0.1	-0.05	0	-0.18	0.07	-0.11	0.03	0.17
D3ZG43	NADH dehydrogenase [ubiquinone] iron-sulfur protein 3, mitochondrial OS=Rattus norvegicus OX=10116 GN=Ndufs3 PE=1 SV=1	18	0.991	0.747	1.012	1.019	1.107	0.65	1.084	1.03	1.03	1.071	-0.01	-0.42	0.02	0.03	0.15	-0.62	0.12	0.04	0.04	0.1
A0A8L2UHV1	Proteasome 26S subunit, ATPase 1 OS=Rattus norvegicus OX=10116 GN=Psmc1 PE=1 SV=1	22	0.902	1.117	0.947	0.938	0.999	1.01	1.024	0.997	1.036	0.991	-0.15	0.16	-0.08	-0.09	0	0.01	0.03	0	0.05	-0.01
A0A0U1RRV5	Clustered mitochondria protein homolog OS=Rattus norvegicus OX=10116 GN=Cluh PE=1 SV=1	29	1.076	0.962	1.009	1.066	1.045	0.844	1.05	1.022	1.044	0.989	0.11	-0.06	0.01	0.09	0.06	-0.25	0.07	0.03	0.06	-0.02
A0A0G2JXJ7	Extended synaptotagmin 1 OS=Rattus norvegicus OX=10116 GN=Esyt1 PE=1 SV=2	26	0.9	1.207	0.846	0.992	0.97	1.584	0.967	1.054	0.926	0.868	-0.15	0.27	-0.24	-0.01	-0.04	0.66	-0.05	0.08	-0.11	-0.2
A0A8I6AWQ8	Fetuin B OS=Rattus norvegicus OX=10116 GN=Fetub PE=1 SV=1	16	0.79	1.139	1.069	0.892	0.829	1.876	0.99	1.125	1.05	0.903	-0.34	0.19	0.1	-0.17	-0.27	0.91	-0.01	0.17	0.07	-0.15
P61983	14-3-3 protein gamma OS=Rattus norvegicus OX=10116 GN=Ywhag PE=1 SV=2	18	0.826	0.756	1.053	0.89	1.018	0.923	0.976	0.83	0.966	1.134	-0.28	-0.4	0.07	-0.17	0.03	-0.12	-0.04	-0.27	-0.05	0.18
Q66X93	Staphylococcal nuclease domain-containing protein 1 OS=Rattus norvegicus OX=10116 GN=Snd1 PE=1 SV=1	26	0.926	1.323	0.928	1.004	0.982	1.266	1.04	1.044	1.015	1.001	-0.11	0.4	-0.11	0.01	-0.03	0.34	0.06	0.06	0.02	0
G3V8T4	DNA damage-binding protein 1 OS=Rattus norvegicus OX=10116 GN=Ddb1 PE=1 SV=1	26	0.898	0.99	0.958	0.981	1.038	0.976	1.036	1.024	1.022	1.05	-0.16	-0.01	-0.06	-0.03	0.05	-0.04	0.05	0.03	0.03	0.07
A0A0G2JSR0	Voltage-dependent anion channel 3 OS=Rattus norvegicus OX=10116 GN=Vdac3 PE=1 SV=2	15	0.509	0.503	1.825	0.666	0.86	0.421	1.028	0.682	1.301	2.465	-0.98	-0.99	0.87	-0.59	-0.22	-1.25	0.04	-0.55	0.38	1.3
A0A0G2K162	Erythrocyte membrane protein band 4.1-like 2 OS=Rattus norvegicus OX=10116 GN=Epb41l2 PE=1 SV=2	26	1.023	1.36	0.878	0.995	0.966	1.203	1.013	1.149	1.027	0.925	0.03	0.44	-0.19	-0.01	-0.05	0.27	0.02	0.2	0.04	-0.11
Q2PS20	Junctophilin-2 OS=Rattus norvegicus OX=10116 GN=Jph2 PE=1 SV=1	20	0.933	0.771	1.019	1.007	1.059	0.781	1.049	1.031	1.05	1.123	-0.1	-0.37	0.03	0.01	0.08	-0.36	0.07	0.04	0.07	0.17
Q9Z2J4	Nexilin OS=Rattus norvegicus OX=10116 GN=Nexn PE=1 SV=1	25	1.009	1.161	0.989	0.966	1.037	0.874	1.009	1.013	1.001	1.028	0.01	0.22	-0.02	-0.05	0.05	-0.19	0.01	0.02	0	0.04
A0A8L2Q4B4	Isocitrate dehydrogenase [NAD] subunit, mitochondrial OS=Rattus norvegicus OX=10116 GN=Idh3b PE=1 SV=1	17	0.888	0.895	1.035	0.917	1.024	0.964	1.063	1.011	1.035	1.111	-0.17	-0.16	0.05	-0.12	0.03	-0.05	0.09	0.02	0.05	0.15
A0A8L2Q065	General vesicular transport factor p115 OS=Rattus norvegicus OX=10116 GN=Uso1 PE=1 SV=1	29	0.89	1.234	0.895	0.929	0.946	1.217	1.009	0.99	0.987	0.968	-0.17	0.3	-0.16	-0.11	-0.08	0.28	0.01	-0.01	-0.02	-0.05
A0A8I6AR12	T-complex protein 1 subunit eta OS=Rattus norvegicus OX=10116 GN=Cct7 PE=1 SV=1	23	0.814	0.994	0.981	0.919	0.973	0.917	1.058	1.02	1.049	1.033	-0.3	-0.01	-0.03	-0.12	-0.04	-0.13	0.08	0.03	0.07	0.05
P23693	Troponin I, cardiac muscle OS=Rattus norvegicus OX=10116 GN=Tnni3 PE=1 SV=2	16	1.066	0.896	1.053	0.983	1.07	0.741	1.031	0.979	1.002	1.077	0.09	-0.16	0.07	-0.03	0.1	-0.43	0.04	-0.03	0	0.11
D4A8U9	Unc-45 homolog B (C. elegans) (Predicted) OS=Rattus norvegicus OX=10116 GN=Unc45b PE=4 SV=1	20	0.998	0.94	0.97	0.997	1.092	0.835	0.994	0.974	1.006	1.004	0	-0.09	-0.04	0	0.13	-0.26	-0.01	-0.04	0.01	0.01
A0A8I6B1P6	Citramalyl-CoA lyase OS=Rattus norvegicus OX=10116 GN=Clybl PE=1 SV=1	16	0.879	0.785	0.943	0.962	1.017	0.796	1.019	0.94	0.986	1.068	-0.19	-0.35	-0.08	-0.06	0.02	-0.33	0.03	-0.09	-0.02	0.1
A0A8I6A4L2	Succinate--CoA ligase [ADP/GDP-forming] subunit alpha, mitochondrial OS=Rattus norvegicus OX=10116 GN=Suclg1 PE=1 SV=1	16	0.849	0.723	1.079	1.004	1.026	0.92	1.033	1.035	1.001	1.07	-0.24	-0.47	0.11	0.01	0.04	-0.12	0.05	0.05	0	0.1
A0A8L2UNA6	Nucleoprotein TPR OS=Rattus norvegicus OX=10116 GN=Tpr PE=1 SV=1	33	1.073	1.147	1.088	1.093	1.112	1.066	1.017	1.133	1.016	1.097	0.1	0.2	0.12	0.13	0.15	0.09	0.02	0.18	0.02	0.13
A0A0G2K658	Carbonyl reductase (NADPH) OS=Rattus norvegicus OX=10116 GN=Cbr1l2 PE=1 SV=2	16	0.932	0.737	0.958	0.938	1.083	0.676	1.031	1.044	1.078	1.037	-0.1	-0.44	-0.06	-0.09	0.11	-0.56	0.04	0.06	0.11	0.05
Q9R1Z0	Voltage-dependent anion-selective channel protein 3 OS=Rattus norvegicus OX=10116 GN=Vdac3 PE=1 SV=2	15	0.681	0.599	1.167	0.781	0.952	0.61	1.111	0.955	1.097	1.293	-0.55	-0.74	0.22	-0.36	-0.07	-0.71	0.15	-0.07	0.13	0.37
Q62670	0 beta-2 globin OS=Rattus norvegicus OX=10116 GN=0 beta-2 globin PE=3 SV=1	13	0.722	1.112	1.696	0.78	0.547	1.232	0.929	0.781	1.089	0.903	-0.47	0.15	0.76	-0.36	-0.87	0.3	-0.11	-0.36	0.12	-0.15
A0A8I6GB84	Voltage-dependent anion channel 2 OS=Rattus norvegicus OX=10116 GN=Vdac2 PE=1 SV=1	17	0.828	0.732	1.162	0.921	0.978	0.69	1.106	0.993	1.087	1.199	-0.27	-0.45	0.22	-0.12	-0.03	-0.54	0.15	-0.01	0.12	0.26
D3ZGY4	Glyceraldehyde-3-phosphate dehydrogenase, pseudogene 2 OS=Rattus norvegicus OX=10116 GN=AABR07025010.1 PE=3 SV=2	11	0.976	0.939	0.86	0.993	1.051	0.814	1.01	0.98	0.963	0.851	-0.04	-0.09	-0.22	-0.01	0.07	-0.3	0.01	-0.03	-0.05	-0.23
Q68FR6	Elongation factor 1-gamma OS=Rattus norvegicus OX=10116 GN=Eef1g PE=2 SV=3	23	0.908	1.078	1.026	0.987	1	1.042	1.104	1.003	1.051	1.091	-0.14	0.11	0.04	-0.02	0	0.06	0.14	0	0.07	0.13
M0R3V7	Sodium/calcium exchanger 1 OS=Rattus norvegicus OX=10116 GN=Slc8a1 PE=3 SV=3	22	0.981	1.037	1.023	1.087	1.082	0.824	1.114	1.007	1.059	1.08	-0.03	0.05	0.03	0.12	0.11	-0.28	0.16	0.01	0.08	0.11
A0A8I6AJ44	Tenascin XB OS=Rattus norvegicus OX=10116 GN=AABR07044388.2 PE=1 SV=1	27	1.077	0.995	0.964	1.001	0.984	0.996	0.918	1.082	0.997	1.062	0.11	-0.01	-0.05	0	-0.02	-0.01	-0.12	0.11	0	0.09
A0A8I6B1G1	PDZ and LIM domain 5 OS=Rattus norvegicus OX=10116 GN=Pdlim5 PE=1 SV=1	14	1.117	0.267	1.192	1.033	1.186	0.146	1.241	0.947	1.071	1.256	0.16	-1.9	0.25	0.05	0.25	-2.78	0.31	-0.08	0.1	0.33
B5DF65	Biliverdin reductase B OS=Rattus norvegicus OX=10116 GN=Blvrb PE=1 SV=1	12	0.969	1.323	0.907	1.038	0.97	1.434	1.008	1.116	1.05	0.865	-0.05	0.4	-0.14	0.05	-0.04	0.52	0.01	0.16	0.07	-0.21
A0A8I6AP12	Hedgehog acyltransferase-like OS=Rattus norvegicus OX=10116 GN=Hhatl PE=4 SV=1	16	0.738	0.651	0.989	0.793	1.01	0.65	1.014	0.948	1.024	1.114	-0.44	-0.62	-0.02	-0.33	0.01	-0.62	0.02	-0.08	0.03	0.16
Q9Z1Y3	Cadherin-2 OS=Rattus norvegicus OX=10116 GN=Cdh2 PE=1 SV=1	19	1.007	0.941	1.045	0.956	1.059	0.795	1.062	0.96	0.995	1.014	0.01	-0.09	0.06	-0.06	0.08	-0.33	0.09	-0.06	-0.01	0.02
A0A0G2JT93	Catenin (Cadherin associated protein), beta 1, isoform CRA_a OS=Rattus norvegicus OX=10116 GN=Ctnnb1 PE=1 SV=1	27	1.01	0.971	0.985	0.974	1.062	0.898	1.081	1.045	1.041	1.029	0.01	-0.04	-0.02	-0.04	0.09	-0.16	0.11	0.06	0.06	0.04
O35077	Glycerol-3-phosphate dehydrogenase [NAD(+)], cytoplasmic OS=Rattus norvegicus OX=10116 GN=Gpd1 PE=1 SV=4	18	0.843	0.954	0.942	0.968	0.996	1.864	1.008	0.991	0.967	0.995	-0.25	-0.07	-0.09	-0.05	-0.01	0.9	0.01	-0.01	-0.05	-0.01
A0A8I6A1G8	protein-glutamine gamma-glutamyltransferase OS=Rattus norvegicus OX=10116 GN=Tgm2 PE=1 SV=1	24	1.199	1.098	0.974	1.02	0.89	1.279	0.922	0.977	0.979	0.946	0.26	0.14	-0.04	0.03	-0.17	0.35	-0.12	-0.03	-0.03	-0.08
Q6AYT3	RNA-splicing ligase RtcB homolog OS=Rattus norvegicus OX=10116 GN=Rtcb PE=2 SV=1	21	0.899	1.028	0.933	0.974	1.037	0.993	1.01	0.989	1.012	1.004	-0.15	0.04	-0.1	-0.04	0.05	-0.01	0.01	-0.02	0.02	0.01
P17209	Myosin light chain 4 OS=Rattus norvegicus OX=10116 GN=Myl4 PE=2 SV=2	15	0.553	4.68	0.59	0.868	0.505	3.735	0.534	0.693	0.525	0.457	-0.85	2.23	-0.76	-0.2	-0.99	1.9	-0.9	-0.53	-0.93	-1.13
A7VJC2	Heterogeneous nuclear ribonucleoproteins A2/B1 OS=Rattus norvegicus OX=10116 GN=Hnrnpa2b1 PE=1 SV=1	18	0.863	0.919	1.019	0.939	1.01	0.995	1.013	1.024	1.024	1.093	-0.21	-0.12	0.03	-0.09	0.01	-0.01	0.02	0.03	0.03	0.13
A0A0G2K2P5	Tight junction protein ZO-1 OS=Rattus norvegicus OX=10116 GN=Tjp1 PE=1 SV=1	29	0.881	1.184	0.836	0.94	0.878	1.221	0.995	1.051	1.012	0.867	-0.18	0.24	-0.26	-0.09	-0.19	0.29	-0.01	0.07	0.02	-0.21
A0A8I5XVU2	Carbonyl reductase (NADPH) OS=Rattus norvegicus OX=10116 GN=Cbr1l2 PE=1 SV=1	16	0.874	0.74	0.979	0.965	1.127	0.725	0.99	0.906	1.019	1.124	-0.19	-0.43	-0.03	-0.05	0.17	-0.46	-0.02	-0.14	0.03	0.17
A0A0G2K6D5	Pitrilysin metalloproteinase 1 OS=Rattus norvegicus OX=10116 GN=Pitrm1 PE=1 SV=1	27	0.937	0.996	0.972	1.012	1.025	0.959	1.014	1.036	1.026	1.058	-0.09	-0.01	-0.04	0.02	0.04	-0.06	0.02	0.05	0.04	0.08
A2RRU1	Glycogen [starch] synthase, muscle OS=Rattus norvegicus OX=10116 GN=Gys1 PE=1 SV=1	19	0.817	0.921	1.009	0.925	1.017	0.858	1.073	1.041	1.053	1.068	-0.29	-0.12	0.01	-0.11	0.02	-0.22	0.1	0.06	0.08	0.09
P58775	Tropomyosin beta chain OS=Rattus norvegicus OX=10116 GN=Tpm2 PE=1 SV=1	19	1.097	2.137	1.012	0.744	1.283	1.038	1.11	0.672	0.972	1.214	0.13	1.1	0.02	-0.43	0.36	0.05	0.15	-0.57	-0.04	0.28
A0A0G2JSK5	Integrin beta OS=Rattus norvegicus OX=10116 GN=Itgb1 PE=3 SV=2	25	0.849	0.727	1.021	0.938	1.054	0.99	1.059	0.958	0.984	1.083	-0.24	-0.46	0.03	-0.09	0.08	-0.01	0.08	-0.06	-0.02	0.11
Q7TP11	6-phosphogluconate dehydrogenase, decarboxylating OS=Rattus norvegicus OX=10116 PE=2 SV=1	21	0.807	1.082	1.034	0.955	0.925	1.536	0.992	0.992	0.978	0.931	-0.31	0.11	0.05	-0.07	-0.11	0.62	-0.01	-0.01	-0.03	-0.1
A0A0G2K5N6	Rho-associated protein kinase OS=Rattus norvegicus OX=10116 GN=Rock2 PE=1 SV=1	31	0.953	1.014	0.951	1.015	1.021	1.017	1.058	1.072	1.054	0.987	-0.07	0.02	-0.07	0.02	0.03	0.02	0.08	0.1	0.08	-0.02
G3V9G5	RCG24674, isoform CRA_b OS=Rattus norvegicus OX=10116 GN=Synm PE=1 SV=2	24	1.275	1.282	1.081	1.086	1.03	1.109	1.069	1.055	1.056	1.03	0.35	0.36	0.11	0.12	0.04	0.15	0.1	0.08	0.08	0.04
P21913	Succinate dehydrogenase [ubiquinone] iron-sulfur subunit, mitochondrial OS=Rattus norvegicus OX=10116 GN=Sdhb PE=2 SV=2	22	0.976	0.74	1.017	0.993	1.048	0.74	1.059	0.984	0.987	1.12	-0.04	-0.43	0.02	-0.01	0.07	-0.43	0.08	-0.02	-0.02	0.16
A0A8I6GKJ1	Integrin beta OS=Rattus norvegicus OX=10116 GN=Itgb1 PE=1 SV=1	25	0.773	0.86	1.043	0.861	0.996	1.467	0.984	0.943	0.922	1.111	-0.37	-0.22	0.06	-0.22	-0.01	0.55	-0.02	-0.08	-0.12	0.15
A0A8I5ZY32	EH domain binding protein 1-like 1 OS=Rattus norvegicus OX=10116 GN=Ehbp1l1 PE=1 SV=1	31	0.942	1.19	0.97	0.976	1.09	1.049	1.055	1.009	1.037	1.045	-0.09	0.25	-0.04	-0.04	0.12	0.07	0.08	0.01	0.05	0.06
Q07116	Sulfite oxidase, mitochondrial OS=Rattus norvegicus OX=10116 GN=Suox PE=1 SV=2	18	0.939	1.043	0.959	1.062	1.063	0.984	1.033	1.06	1.028	0.982	-0.09	0.06	-0.06	0.09	0.09	-0.02	0.05	0.08	0.04	-0.03
A0A8I5ZQD4	Dystonin OS=Rattus norvegicus OX=10116 GN=Dst PE=1 SV=1	41	1.06	1.485	0.971	1.089	1.03	0.963	1.063	1.061	1.031	1.031	0.08	0.57	-0.04	0.12	0.04	-0.05	0.09	0.09	0.04	0.04
G3V9E3	Caldesmon 1 OS=Rattus norvegicus OX=10116 GN=Cald1 PE=4 SV=2	22	0.813	0.943	0.849	0.898	0.961	1.72	0.888	0.892	0.875	0.992	-0.3	-0.08	-0.24	-0.15	-0.06	0.78	-0.17	-0.16	-0.19	-0.01
Q5XIC6	Proteasome (Prosome, macropain) 26S subunit, non-ATPase, 12 OS=Rattus norvegicus OX=10116 GN=Psmd12 PE=1 SV=1	18	0.842	1.041	0.954	0.991	1.016	1.048	1.062	1.01	1.096	1.105	-0.25	0.06	-0.07	-0.01	0.02	0.07	0.09	0.01	0.13	0.14
A0A0G2K1Q7	Ankyrin-3 OS=Rattus norvegicus OX=10116 GN=Ank3 PE=1 SV=1	28	1.041	1.032	0.984	0.981	1.054	1.007	1.054	1.089	1.049	1.037	0.06	0.04	-0.02	-0.03	0.08	0.01	0.08	0.12	0.07	0.05
Q62952	Dihydropyrimidinase-related protein 3 OS=Rattus norvegicus OX=10116 GN=Dpysl3 PE=1 SV=2	19	0.951	1.454	0.832	0.982	0.91	1.769	0.95	1.055	0.984	0.866	-0.07	0.54	-0.26	-0.03	-0.14	0.82	-0.07	0.08	-0.02	-0.21
D3ZZ68	Synaptopodin 2-like OS=Rattus norvegicus OX=10116 GN=Synpo2l PE=1 SV=1	23	1.199	1.104	0.982	1.032	1.027	0.797	0.977	1.004	0.999	0.915	0.26	0.14	-0.03	0.05	0.04	-0.33	-0.03	0.01	0	-0.13
F1LZC5	NADH dehydrogenase [ubiquinone] 1 alpha subcomplex subunit 13 OS=Rattus norvegicus OX=10116 GN=Ndufa13-ps1 PE=1 SV=3	13	1.039	0.87	1.044	1.068	1.103	0.662	1.106	1.027	1.104	1.049	0.05	-0.2	0.06	0.09	0.14	-0.59	0.15	0.04	0.14	0.07
A0A0G2JSG6	Adenylate kinase 2, mitochondrial OS=Rattus norvegicus OX=10116 GN=Ak2 PE=1 SV=1	17	1.019	0.869	1.062	1.033	1.049	0.901	1.072	1.044	1.054	1.078	0.03	-0.2	0.09	0.05	0.07	-0.15	0.1	0.06	0.08	0.11
Q6IN39	Hsd17b4 protein OS=Rattus norvegicus OX=10116 GN=Hsd17b4 PE=2 SV=1	19	1.046	0.91	0.985	1.013	1.061	0.883	1.01	0.976	1.024	1.088	0.06	-0.14	-0.02	0.02	0.09	-0.18	0.01	-0.03	0.03	0.12
A0A8I6A4W2	Kinectin 1 OS=Rattus norvegicus OX=10116 GN=Ktn1 PE=1 SV=1	31	0.981	1.198	0.92	0.936	1.014	1.011	1.014	0.991	1.021	0.987	-0.03	0.26	-0.12	-0.1	0.02	0.02	0.02	-0.01	0.03	-0.02
D3ZWC6	Syntrophin, basic 1 (Predicted) OS=Rattus norvegicus OX=10116 GN=Sntb1 PE=1 SV=1	23	1.046	1.046	1.015	0.995	1.044	0.934	1.122	1.086	1.131	1.097	0.07	0.06	0.02	-0.01	0.06	-0.1	0.17	0.12	0.18	0.13
Q5U2N2	Ubiquitin carboxyl-terminal hydrolase OS=Rattus norvegicus OX=10116 GN=Usp14 PE=2 SV=1	24	0.908	1.118	0.921	0.979	0.975	1.073	1.027	1.018	1.033	0.947	-0.14	0.16	-0.12	-0.03	-0.04	0.1	0.04	0.03	0.05	-0.08
A0A8I5Y1T6	Protein 4.1 OS=Rattus norvegicus OX=10116 GN=Epb41 PE=1 SV=1	19	0.997	1.429	0.837	1.017	0.829	1.372	0.998	1.088	1.092	0.797	0	0.52	-0.26	0.02	-0.27	0.46	0	0.12	0.13	-0.33
A0A0G2K3Z9	Peroxiredoxin-1 OS=Rattus norvegicus OX=10116 GN=Prdx1l1 PE=3 SV=1	16	0.918	1.125	0.95	1.006	1.005	1.203	1.029	1.01	1.007	0.956	-0.12	0.17	-0.07	0.01	0.01	0.27	0.04	0.01	0.01	-0.06
P29266	3-hydroxyisobutyrate dehydrogenase, mitochondrial OS=Rattus norvegicus OX=10116 GN=Hibadh PE=1 SV=3	14	1.008	0.914	0.978	1.026	1.048	0.912	0.992	0.948	0.959	0.962	0.01	-0.13	-0.03	0.04	0.07	-0.13	-0.01	-0.08	-0.06	-0.06
P14669	Annexin A3 OS=Rattus norvegicus OX=10116 GN=Anxa3 PE=1 SV=4	17	0.857	1.015	0.975	0.973	1.012	1.07	0.997	1.032	0.986	1.012	-0.22	0.02	-0.04	-0.04	0.02	0.1	0	0.05	-0.02	0.02
D4A0T0	NADH dehydrogenase [ubiquinone] 1 beta subcomplex subunit 10 OS=Rattus norvegicus OX=10116 GN=Ndufb10 PE=1 SV=1	16	1.002	0.687	1.052	1.001	1.06	0.618	1.095	0.986	1.012	1.094	0	-0.54	0.07	0	0.08	-0.69	0.13	-0.02	0.02	0.13
Q7TP57	Signal transducer and activator of transcription OS=Rattus norvegicus OX=10116 PE=2 SV=1	22	0.87	0.923	0.856	0.923	1.007	0.811	1.068	0.938	1.13	1.061	-0.2	-0.12	-0.22	-0.12	0.01	-0.3	0.09	-0.09	0.18	0.09
A0A0G2K2C7	ubiquitinyl hydrolase 1 OS=Rattus norvegicus OX=10116 GN=Usp9x PE=1 SV=2	30	0.925	1.115	0.899	0.918	0.975	1.114	1.008	1.062	1.067	0.988	-0.11	0.16	-0.15	-0.12	-0.04	0.16	0.01	0.09	0.09	-0.02
Q68FY4	Vitamin D-binding protein OS=Rattus norvegicus OX=10116 GN=Gc PE=1 SV=1	18	0.914	1.265	0.857	0.914	0.921	2.099	0.977	1.131	1.009	0.806	-0.13	0.34	-0.22	-0.13	-0.12	1.07	-0.03	0.18	0.01	-0.31
A0A8I6A621	Protein kinase cAMP-dependent type I regulatory subunit alpha OS=Rattus norvegicus OX=10116 GN=Prkar1a PE=1 SV=1	18	1.036	0.959	1.014	1.067	1.067	0.865	1.013	1.008	1.017	1.097	0.05	-0.06	0.02	0.09	0.09	-0.21	0.02	0.01	0.02	0.13
P18420	Proteasome subunit alpha type-1 OS=Rattus norvegicus OX=10116 GN=Psma1 PE=1 SV=2	17	0.871	0.961	0.965	0.958	1.043	1.029	1.064	1.004	1.063	1.05	-0.2	-0.06	-0.05	-0.06	0.06	0.04	0.09	0.01	0.09	0.07
A0A8L2R8P7	Kininogen 1 OS=Rattus norvegicus OX=10116 GN=Kng1 PE=4 SV=1	21	0.88	1.358	0.833	0.938	0.829	2.319	0.928	1.072	1.009	0.783	-0.18	0.44	-0.26	-0.09	-0.27	1.21	-0.11	0.1	0.01	-0.35
A0A8I6A147	Perilipin OS=Rattus norvegicus OX=10116 GN=Plin3 PE=1 SV=1	18	1.029	0.874	1.003	0.999	1.077	0.786	1.03	1.014	0.995	1.041	0.04	-0.19	0	0	0.11	-0.35	0.04	0.02	-0.01	0.06
D3ZCF8	ATP-binding cassette, subfamily A (ABC1), member 8a OS=Rattus norvegicus OX=10116 GN=Abca8a PE=1 SV=3	23	0.855	1.354	0.929	0.965	0.963	1.3	0.986	1.168	0.99	1.034	-0.23	0.44	-0.11	-0.05	-0.05	0.38	-0.02	0.22	-0.01	0.05
A0A8L2QDD2	Tropomyosin 3 OS=Rattus norvegicus OX=10116 GN=Tpm3 PE=1 SV=1	21	0.927	1.195	0.987	0.952	1	1.287	0.964	0.969	1.129	0.967	-0.11	0.26	-0.02	-0.07	0	0.36	-0.05	-0.05	0.17	-0.05
A0A8I5ZSL9	Basic leucine zipper and W2 domains 2 OS=Rattus norvegicus OX=10116 GN=Bzw2 PE=1 SV=1	24	0.961	0.896	1.019	1.004	1.035	0.738	1.034	1.002	1.033	1.099	-0.06	-0.16	0.03	0.01	0.05	-0.44	0.05	0	0.05	0.14
A0A8I6AT92	Amine oxidase OS=Rattus norvegicus OX=10116 GN=Maoa PE=1 SV=1	19	1.182	0.925	0.938	0.865	0.855	0.809	1.159	0.91	1.179	1.044	0.24	-0.11	-0.09	-0.21	-0.23	-0.31	0.21	-0.14	0.24	0.06
Q68FS4	Cytosol aminopeptidase OS=Rattus norvegicus OX=10116 GN=Lap3 PE=1 SV=1	24	0.91	0.875	0.951	1.016	1.053	0.931	1.011	0.947	0.976	0.969	-0.14	-0.19	-0.07	0.02	0.07	-0.1	0.02	-0.08	-0.03	-0.05
A0A8I5ZVC4	Inter-alpha-trypsin inhibitor heavy chain 2 OS=Rattus norvegicus OX=10116 GN=Itih2 PE=1 SV=1	26	0.93	1.56	0.787	1.022	0.853	1.967	1.001	1.07	1.036	0.73	-0.1	0.64	-0.35	0.03	-0.23	0.98	0	0.1	0.05	-0.45
A0A8I5ZMR1	Peptidylglycine alpha-amidating monooxygenase OS=Rattus norvegicus OX=10116 GN=Pam PE=3 SV=1	20	0.329	5.421	0.462	0.647	0.444	3.738	0.511	0.674	0.489	0.456	-1.6	2.44	-1.11	-0.63	-1.17	1.9	-0.97	-0.57	-1.03	-1.13
A0A8I5Y8E5	Protein phosphatase 1 regulatory subunit OS=Rattus norvegicus OX=10116 GN=Ppp1r12a PE=1 SV=1	26	0.957	1.137	0.955	0.975	0.982	1.093	0.989	1.075	1.04	1.035	-0.06	0.19	-0.07	-0.04	-0.03	0.13	-0.02	0.1	0.06	0.05
A0A8I6A2W7	ADP/ATP translocase OS=Rattus norvegicus OX=10116 GN=ENSRNOG00000063289 PE=3 SV=1	12	0.738	0.74	1.209	0.693	0.818	0.69	0.943	0.902	1.185	1.317	-0.44	-0.43	0.27	-0.53	-0.29	-0.54	-0.08	-0.15	0.24	0.4
A0A0G2K2V2	AP complex subunit beta OS=Rattus norvegicus OX=10116 GN=Ap1b1 PE=1 SV=2	25	0.895	1.041	0.882	0.997	0.987	1.105	0.998	0.978	0.978	0.914	-0.16	0.06	-0.18	0	-0.02	0.14	0	-0.03	-0.03	-0.13
A0A0G2K3T7	Protein NDRG2 OS=Rattus norvegicus OX=10116 GN=Ndrg2 PE=1 SV=1	12	0.941	0.885	1.04	1.01	1.065	0.794	1.034	1.006	0.994	1.054	-0.09	-0.18	0.06	0.01	0.09	-0.33	0.05	0.01	-0.01	0.08
Q7TPB1	T-complex protein 1 subunit delta OS=Rattus norvegicus OX=10116 GN=Cct4 PE=1 SV=3	19	0.955	1.032	0.997	0.975	0.965	0.983	0.963	1.022	1.009	1.033	-0.07	0.05	0	-0.04	-0.05	-0.02	-0.05	0.03	0.01	0.05
Q63718	Heat shock rotein 70 (Fragment) OS=Rattus rattus OX=10117 PE=2 SV=1	18	0.821	0.804	1.001	0.874	1.018	0.936	0.912	0.907	0.982	0.942	-0.28	-0.31	0	-0.19	0.03	-0.1	-0.13	-0.14	-0.03	-0.09
Q5XIC0	Enoyl-CoA delta isomerase 2 OS=Rattus norvegicus OX=10116 GN=Eci2 PE=1 SV=1	14	0.964	0.801	1.044	1.006	1.059	0.755	1.035	0.994	1.024	1.048	-0.05	-0.32	0.06	0.01	0.08	-0.4	0.05	-0.01	0.03	0.07
M0RC66	Adenylate kinase isoenzyme 1 OS=Rattus norvegicus OX=10116 GN=Ak1 PE=1 SV=3	14	0.886	0.841	0.987	0.981	1.067	0.865	1.041	0.973	1.006	1.092	-0.17	-0.25	-0.02	-0.03	0.09	-0.21	0.06	-0.04	0.01	0.13
A0A5P8DHN0	Nesprin 1 long isoform OS=Rattus norvegicus OX=10116 GN=Syne1 PE=2 SV=1	32	0.924	1.032	0.979	0.955	1	1.514	0.991	1.067	1	1.087	-0.11	0.04	-0.03	-0.07	0	0.6	-0.01	0.09	0	0.12
A0A8I6AHF8	Phosphoglucomutase 5 OS=Rattus norvegicus OX=10116 GN=Pgm5 PE=1 SV=1	21	0.906	1.119	0.943	0.95	0.977	1.288	0.995	0.993	0.962	0.989	-0.14	0.16	-0.08	-0.07	-0.03	0.37	-0.01	-0.01	-0.06	-0.02
Q8R491	EH domain-containing protein 3 OS=Rattus norvegicus OX=10116 GN=Ehd3 PE=1 SV=2	22	0.775	1.229	0.923	1.039	0.996	1.64	1.057	1.035	1.098	1.032	-0.37	0.3	-0.11	0.06	-0.01	0.71	0.08	0.05	0.14	0.05
A0A8I6AQJ5	Aldehyde dehydrogenase 9 family, member A1 OS=Rattus norvegicus OX=10116 GN=Aldh9a1 PE=1 SV=1	17	0.893	0.933	1.019	1.01	1.051	0.937	1.103	1.026	1.041	1.066	-0.16	-0.1	0.03	0.01	0.07	-0.09	0.14	0.04	0.06	0.09
P08009	Glutathione S-transferase Mu 7 OS=Rattus norvegicus OX=10116 GN=Gstm7 PE=1 SV=2	17	1.007	0.942	1.001	1.082	1.086	0.979	1.082	1.064	1.023	0.981	0.01	-0.09	0	0.11	0.12	-0.03	0.11	0.09	0.03	-0.03
A0A8I6ALB1	Cytoskeleton associated protein 5 OS=Rattus norvegicus OX=10116 GN=Ckap5 PE=1 SV=1	25	0.964	1.218	0.96	1	0.976	1.233	1.005	1.024	1.037	0.967	-0.05	0.28	-0.06	0	-0.03	0.3	0.01	0.03	0.05	-0.05
P54319	Phospholipase A-2-activating protein OS=Rattus norvegicus OX=10116 GN=Plaa PE=1 SV=3	21	0.948	1.107	0.912	0.985	1.01	1.083	1.009	1.017	1.002	0.963	-0.08	0.15	-0.13	-0.02	0.01	0.11	0.01	0.02	0	-0.05
A0A8I5ZKF7	Annexin OS=Rattus norvegicus OX=10116 GN=Anxa1 PE=1 SV=1	16	0.83	1.498	0.809	0.912	0.877	1.892	0.899	1.017	0.918	0.884	-0.27	0.58	-0.31	-0.13	-0.19	0.92	-0.15	0.02	-0.12	-0.18
F7F389	Complement C9 OS=Rattus norvegicus OX=10116 GN=C9 PE=1 SV=1	21	0.915	1.432	0.836	1.033	0.944	1.488	0.98	1.036	1.08	0.83	-0.13	0.52	-0.26	0.05	-0.08	0.57	-0.03	0.05	0.11	-0.27
A0A8L2ULJ1	Elongation factor G, mitochondrial OS=Rattus norvegicus OX=10116 GN=Gfm1 PE=1 SV=1	20	0.838	0.848	1.034	0.976	1.028	0.894	1.074	0.979	1.043	1.103	-0.25	-0.24	0.05	-0.04	0.04	-0.16	0.1	-0.03	0.06	0.14
F1LNH3	Collagen type VI alpha 2 chain OS=Rattus norvegicus OX=10116 GN=Col6a2 PE=4 SV=3	22	1.192	1.001	1.205	1.081	1.007	1.041	0.822	0.973	0.938	0.992	0.25	0	0.27	0.11	0.01	0.06	-0.28	-0.04	-0.09	-0.01
D2E6K0	NADH-ubiquinone oxidoreductase chain 4 OS=Rattus norvegicus OX=10116 GN=ND4 PE=3 SV=1	11	0.826	0.625	1.029	0.939	1.104	0.602	0.934	0.883	0.916	1.015	-0.28	-0.68	0.04	-0.09	0.14	-0.73	-0.1	-0.18	-0.13	0.02
D3ZH41	Cytoskeleton-associated protein 4 OS=Rattus norvegicus OX=10116 GN=Ckap4 PE=4 SV=3	23	1.013	1.216	0.962	1.051	1.077	1.009	1.104	1.026	1.079	1.067	0.02	0.28	-0.06	0.07	0.11	0.01	0.14	0.04	0.11	0.09
F7FLB7	Annexin OS=Rattus norvegicus OX=10116 GN=Anxa11 PE=1 SV=1	20	1.218	0.993	1.179	1.188	1.19	0.726	0.923	0.891	0.954	0.955	0.28	-0.01	0.24	0.25	0.25	-0.46	-0.12	-0.17	-0.07	-0.07
A0A8I5ZLC1	Phosphatidylethanolamine binding protein 1 OS=Rattus norvegicus OX=10116 GN=Pebp1 PE=1 SV=1	11	0.959	0.951	1	0.99	0.981	1.184	0.997	0.956	0.971	1.016	-0.06	-0.07	0	-0.01	-0.03	0.24	0	-0.07	-0.04	0.02
A0A8L2QMN5	Peptidylglycine alpha-amidating monooxygenase OS=Rattus norvegicus OX=10116 GN=Pam PE=3 SV=1	21	0.641	3.819	0.633	0.845	0.643	2.547	0.675	0.808	0.643	0.603	-0.64	1.93	-0.66	-0.24	-0.64	1.35	-0.57	-0.31	-0.64	-0.73
P52944	PDZ and LIM domain protein 1 OS=Rattus norvegicus OX=10116 GN=Pdlim1 PE=1 SV=4	18	0.985	0.86	0.96	0.963	0.989	1.034	0.99	0.982	1.024	1.056	-0.02	-0.22	-0.06	-0.05	-0.02	0.05	-0.01	-0.03	0.03	0.08
A0A8I5ZS65	Protein NDRG2 OS=Rattus norvegicus OX=10116 GN=Ndrg2 PE=1 SV=1	11	0.676	0.688	1.099	0.839	0.975	0.659	1.089	0.653	0.877	1.179	-0.57	-0.54	0.14	-0.25	-0.04	-0.6	0.12	-0.61	-0.19	0.24
G3V9N0	Polyadenylate-binding protein OS=Rattus norvegicus OX=10116 GN=Pabpc4 PE=1 SV=3	21	0.922	0.938	0.98	0.969	1.037	0.865	1.073	1.04	1.064	1.064	-0.12	-0.09	-0.03	-0.05	0.05	-0.21	0.1	0.06	0.09	0.09
A0A8I5ZV20	Mitochondrial import inner membrane translocase subunit TIM44 OS=Rattus norvegicus OX=10116 GN=Timm44 PE=1 SV=1	24	0.94	0.679	1.04	0.991	1.095	0.744	1.082	0.996	1.053	1.088	-0.09	-0.56	0.06	-0.01	0.13	-0.43	0.11	-0.01	0.07	0.12
A0A0H2UHG3	Cullin 5 OS=Rattus norvegicus OX=10116 GN=Cul5 PE=1 SV=1	25	0.779	0.998	0.954	0.871	1.001	0.968	1.032	1.01	1.007	1.008	-0.36	0	-0.07	-0.2	0	-0.05	0.05	0.01	0.01	0.01
A0A8I6ATI8	Dihydrolipoamide acetyltransferase component of pyruvate dehydrogenase complex OS=Rattus norvegicus OX=10116 GN=Pdhx PE=1 SV=1	20	0.979	0.827	0.992	0.997	1.029	0.747	1.076	1.016	1.048	1.068	-0.03	-0.27	-0.01	0	0.04	-0.42	0.11	0.02	0.07	0.09
Q6Q0N1	Cytosolic non-specific dipeptidase OS=Rattus norvegicus OX=10116 GN=Cndp2 PE=1 SV=1	19	0.952	0.993	0.94	0.997	1.019	1.24	1.017	0.974	1.001	0.992	-0.07	-0.01	-0.09	0	0.03	0.31	0.03	-0.04	0	-0.01
Q66HM2	AP-2 complex subunit alpha OS=Rattus norvegicus OX=10116 GN=Ap2a2 PE=1 SV=1	26	0.84	1.069	0.914	0.93	0.932	1.077	1.015	1.02	1.043	1.003	-0.25	0.1	-0.13	-0.1	-0.1	0.11	0.02	0.03	0.06	0
A0A0G2K5E4	DnaJ heat shock protein family (Hsp40) member A3 OS=Rattus norvegicus OX=10116 GN=Dnaja3 PE=1 SV=1	16	1.065	0.8	1.113	0.996	1.05	0.803	1.095	1.078	1.067	1.073	0.09	-0.32	0.15	-0.01	0.07	-0.32	0.13	0.11	0.09	0.1
A0A8I6GJC1	PDZ and LIM domain 5 OS=Rattus norvegicus OX=10116 GN=Pdlim5 PE=1 SV=1	14	1.078	0.933	1.044	0.988	1.071	0.782	1.002	0.967	1.134	1.1	0.11	-0.1	0.06	-0.02	0.1	-0.35	0	-0.05	0.18	0.14
A0A8L2Q4Y6	dynamin GTPase OS=Rattus norvegicus OX=10116 GN=Dnm2 PE=1 SV=1	21	0.975	1.14	0.954	0.982	1.006	1.095	1.017	1.065	1.044	1.03	-0.04	0.19	-0.07	-0.03	0.01	0.13	0.02	0.09	0.06	0.04
P51593	E3 ubiquitin-protein ligase HUWE1 OS=Rattus norvegicus OX=10116 GN=Huwe1 PE=1 SV=3	28	1.08	1.263	0.919	1.045	1.021	1.118	0.992	1.067	1.024	0.916	0.11	0.34	-0.12	0.06	0.03	0.16	-0.01	0.09	0.03	-0.13
A0A0G2K8S1	Solute carrier family 12 member 7 OS=Rattus norvegicus OX=10116 GN=Slc12a7 PE=1 SV=2	21	0.953	0.771	1.028	0.99	1.056	0.77	1.064	0.948	1.063	1.088	-0.07	-0.37	0.04	-0.01	0.08	-0.38	0.09	-0.08	0.09	0.12
A0A8I5ZQM2	Dystrobrevin OS=Rattus norvegicus OX=10116 GN=Dtna PE=3 SV=1	21	0.977	0.917	0.946	0.973	1.033	0.849	1.015	1.014	1.022	1.018	-0.03	-0.12	-0.08	-0.04	0.05	-0.24	0.02	0.02	0.03	0.03
P02680	Fibrinogen gamma chain OS=Rattus norvegicus OX=10116 GN=Fgg PE=1 SV=3	18	1.065	0.868	1.109	1.193	1.101	0.968	0.977	0.974	0.968	0.887	0.09	-0.2	0.15	0.26	0.14	-0.05	-0.03	-0.04	-0.05	-0.17
A0A8L2QVV5	Dolichyl-diphosphooligosaccharide--protein glycosyltransferase subunit 2 OS=Rattus norvegicus OX=10116 GN=Rpn2 PE=1 SV=1	13	0.88	1.002	0.926	0.957	1.012	1.08	1	1.005	0.987	0.995	-0.19	0	-0.11	-0.06	0.02	0.11	0	0.01	-0.02	-0.01
F1LQ55	Sterol carrier protein 2 OS=Rattus norvegicus OX=10116 GN=Scp2 PE=1 SV=4	19	0.988	0.916	0.967	0.993	1.056	0.837	0.993	0.983	1.011	1.037	-0.02	-0.13	-0.05	-0.01	0.08	-0.26	-0.01	-0.03	0.02	0.05
F1LYX9	Desmoglein 2 OS=Rattus norvegicus OX=10116 GN=Dsg2 PE=1 SV=2	23	1.096	0.995	1.045	1.048	1.101	0.774	1.031	0.995	1.022	1.018	0.13	-0.01	0.06	0.07	0.14	-0.37	0.04	-0.01	0.03	0.03
O88767	Parkinson disease protein 7 homolog OS=Rattus norvegicus OX=10116 GN=Park7 PE=1 SV=1	13	0.874	0.91	0.939	1.008	0.996	0.972	0.969	0.967	0.962	1.008	-0.19	-0.14	-0.09	0.01	-0.01	-0.04	-0.05	-0.05	-0.06	0.01
B2GVB7	Acylamino-acid-releasing enzyme OS=Rattus norvegicus OX=10116 GN=Apeh PE=2 SV=1	17	0.888	1.486	0.814	1.041	0.879	1.583	0.965	1.121	1.007	0.809	-0.17	0.57	-0.3	0.06	-0.19	0.66	-0.05	0.16	0.01	-0.31
Q5RKK3	Epoxide hydrolase 2 OS=Rattus norvegicus OX=10116 GN=Ephx2 PE=1 SV=1	21	0.955	0.863	0.977	1.066	1.103	0.806	0.999	1.017	0.996	0.981	-0.07	-0.21	-0.03	0.09	0.14	-0.31	0	0.02	-0.01	-0.03
P97521	Mitochondrial carnitine/acylcarnitine carrier protein OS=Rattus norvegicus OX=10116 GN=Slc25a20 PE=1 SV=1	19	0.797	0.616	1.106	0.779	1.007	0.545	1.064	0.953	1.086	1.234	-0.33	-0.7	0.15	-0.36	0.01	-0.88	0.09	-0.07	0.12	0.3
Q6AYS7	Aminoacylase-1A OS=Rattus norvegicus OX=10116 GN=Acy1a PE=1 SV=1	21	0.912	0.815	0.987	1.013	1.034	0.927	1.006	0.99	0.96	1.046	-0.13	-0.29	-0.02	0.02	0.05	-0.11	0.01	-0.01	-0.06	0.06
A0A8I6AM03	FMR1 autosomal homolog 1 OS=Rattus norvegicus OX=10116 GN=Fxr1 PE=1 SV=1	22	0.912	0.848	0.98	1	1.042	0.8	1.064	1.078	1.074	1.081	-0.13	-0.24	-0.03	0	0.06	-0.32	0.09	0.11	0.1	0.11
A0A8I6A0J8	3-hydroxyisobutyryl-CoA hydrolase OS=Rattus norvegicus OX=10116 GN=Hibch PE=1 SV=1	21	0.988	0.739	1.062	1.029	1.067	0.809	1.035	0.973	1.009	1.077	-0.02	-0.44	0.09	0.04	0.09	-0.31	0.05	-0.04	0.01	0.11
D4A5L9	Similar to Cytochrome c, somatic OS=Rattus norvegicus OX=10116 GN=LOC690675 PE=3 SV=1	9	1.028	0.766	1.04	1.149	1.119	0.682	1.13	1.023	1.012	1.055	0.04	-0.38	0.06	0.2	0.16	-0.55	0.18	0.03	0.02	0.08
D3ZGK7	Carboxylic ester hydrolase OS=Rattus norvegicus OX=10116 GN=Ces1c PE=1 SV=4	17	0.947	1.583	0.82	1.001	0.838	2.099	0.945	1.024	1.022	0.677	-0.08	0.66	-0.29	0	-0.26	1.07	-0.08	0.03	0.03	-0.56
D4ADE8	RNA helicase OS=Rattus norvegicus OX=10116 GN=Ddx3x PE=3 SV=3	23	0.813	0.918	0.964	0.853	1.021	0.931	1.058	1.005	1.125	1.15	-0.3	-0.12	-0.05	-0.23	0.03	-0.1	0.08	0.01	0.17	0.2
P01048	T-kininogen 1 OS=Rattus norvegicus OX=10116 GN=Map1 PE=1 SV=2	17	0.901	1.293	0.845	0.965	0.881	1.905	0.927	1.075	0.973	0.86	-0.15	0.37	-0.24	-0.05	-0.18	0.93	-0.11	0.1	-0.04	-0.22
Q5XI73	Rho GDP-dissociation inhibitor 1 OS=Rattus norvegicus OX=10116 GN=Arhgdia PE=1 SV=1	12	0.819	1.011	0.996	0.976	0.951	1.3	0.995	0.961	0.997	1.041	-0.29	0.02	-0.01	-0.03	-0.07	0.38	-0.01	-0.06	0	0.06
Q5FVT5	Protein-serine/threonine kinase OS=Rattus norvegicus OX=10116 GN=Pdk1 PE=1 SV=1	17	0.769	0.672	1.002	0.839	1.073	0.647	1.07	0.949	1.074	1.112	-0.38	-0.57	0	-0.25	0.1	-0.63	0.1	-0.08	0.1	0.15
Q9JLA3	UDP-glucose:glycoprotein glucosyltransferase 1 OS=Rattus norvegicus OX=10116 GN=Uggt1 PE=1 SV=2	24	0.926	1.062	0.909	0.957	0.955	0.988	0.988	0.97	0.987	0.938	-0.11	0.09	-0.14	-0.06	-0.07	-0.02	-0.02	-0.04	-0.02	-0.09
A0A8I5ZZ07	RAB1B, member RAS oncogene family OS=Rattus norvegicus OX=10116 GN=Rab1b PE=1 SV=1	15	0.956	0.993	0.963	1.023	1.036	0.956	1.039	0.995	1.01	1.03	-0.07	-0.01	-0.05	0.03	0.05	-0.07	0.06	-0.01	0.01	0.04
O55096	Dipeptidyl peptidase 3 OS=Rattus norvegicus OX=10116 GN=Dpp3 PE=1 SV=2	24	1.062	1.033	0.954	1.08	1.068	1.166	1.057	1.067	1.05	1.017	0.09	0.05	-0.07	0.11	0.1	0.22	0.08	0.09	0.07	0.02
A0A8I6GE08	Guanylate binding protein 1 OS=Rattus norvegicus OX=10116 GN=Gbp1 PE=3 SV=1	20	1.086	0.867	0.916	0.991	1.053	0.778	1.093	0.876	1.185	0.958	0.12	-0.21	-0.13	-0.01	0.07	-0.36	0.13	-0.19	0.24	-0.06
P20070	NADH-cytochrome b5 reductase 3 OS=Rattus norvegicus OX=10116 GN=Cyb5r3 PE=1 SV=2	16	0.901	0.924	1.034	1.027	1.042	0.97	1.097	1.045	1.074	1.097	-0.15	-0.11	0.05	0.04	0.06	-0.04	0.13	0.06	0.1	0.13
P12711	Alcohol dehydrogenase class-3 OS=Rattus norvegicus OX=10116 GN=Adh5 PE=1 SV=2	15	1.032	1.316	0.91	1.106	0.991	1.04	0.997	1.04	0.988	0.911	0.05	0.4	-0.14	0.15	-0.01	0.06	0	0.06	-0.02	-0.14
A0A8I6AB76	Basal cell adhesion molecule (Lutheran blood group) OS=Rattus norvegicus OX=10116 GN=Bcam PE=1 SV=1	17	0.982	1.094	1.009	1.003	0.983	1.011	0.974	0.977	0.995	1.06	-0.03	0.13	0.01	0	-0.03	0.02	-0.04	-0.03	-0.01	0.08
D3ZPR0	Exportin-2 OS=Rattus norvegicus OX=10116 GN=Cse1l PE=1 SV=1	26	0.816	1.064	0.918	0.963	1.022	0.999	1.001	0.995	0.992	1.002	-0.29	0.09	-0.12	-0.05	0.03	0	0	-0.01	-0.01	0
M0R735	Synaptotagmin binding, cytoplasmic RNA interacting protein OS=Rattus norvegicus OX=10116 GN=Syncrip PE=1 SV=3	17	0.956	1.137	0.947	1.013	1.026	1.188	1.041	1.004	1.019	1.044	-0.07	0.19	-0.08	0.02	0.04	0.25	0.06	0.01	0.03	0.06
A0A8I5Y7R1	Protein disulfide-isomerase A6 OS=Rattus norvegicus OX=10116 GN=Pdia6 PE=1 SV=1	16	0.867	1.501	0.888	0.95	0.964	1.225	0.953	1.007	0.977	0.909	-0.21	0.59	-0.17	-0.07	-0.05	0.29	-0.07	0.01	-0.03	-0.14
A0A8I6AFK9	CAP-GLY domain containing linker protein 1 OS=Rattus norvegicus OX=10116 GN=Clip1 PE=1 SV=1	31	0.929	1.014	0.977	0.987	1.039	0.956	1.041	1.022	1.034	0.998	-0.11	0.02	-0.03	-0.02	0.06	-0.06	0.06	0.03	0.05	0
P62909	40S ribosomal protein S3 OS=Rattus norvegicus OX=10116 GN=Rps3 PE=1 SV=1	17	0.806	0.97	1.101	0.974	0.987	1.022	1.026	1.041	1.047	1.123	-0.31	-0.04	0.14	-0.04	-0.02	0.03	0.04	0.06	0.07	0.17
P11951	Cytochrome c oxidase subunit 6C-2 OS=Rattus norvegicus OX=10116 GN=Cox6c2 PE=1 SV=3	11	0.941	0.637	1.038	0.984	1.056	0.589	1.083	0.925	0.97	1.095	-0.09	-0.65	0.05	-0.02	0.08	-0.76	0.12	-0.11	-0.04	0.13
A0A8L2Q7I4	Peptidase (Prosome, macropain) 26S subunit, ATPase 5, isoform CRA_b OS=Rattus norvegicus OX=10116 GN=Psmc5 PE=1 SV=1	17	0.925	1.103	0.931	0.974	1.017	1.018	1.008	1.037	1.044	0.941	-0.11	0.14	-0.1	-0.04	0.02	0.03	0.01	0.05	0.06	-0.09
A0A0G2K8B4	Platelet glycoprotein 4-like OS=Rattus norvegicus OX=10116 GN=RGD1565355 PE=1 SV=1	16	0.882	0.623	1.062	0.928	1.05	0.571	1.015	0.885	0.995	1.081	-0.18	-0.68	0.09	-0.11	0.07	-0.81	0.02	-0.18	-0.01	0.11
E9PTN6	Glyceraldehyde-3-phosphate dehydrogenase OS=Rattus norvegicus OX=10116 GN=LOC108352348 PE=1 SV=1	16	1.059	0.991	0.952	0.961	1.026	0.827	1.003	0.911	0.966	1.015	0.08	-0.01	-0.07	-0.06	0.04	-0.27	0	-0.13	-0.05	0.02
Q9QZA2	Programmed cell death 6-interacting protein OS=Rattus norvegicus OX=10116 GN=Pdcd6ip PE=1 SV=2	23	0.906	1.239	0.912	0.948	1.028	1.236	0.986	1.049	0.994	0.934	-0.14	0.31	-0.13	-0.08	0.04	0.31	-0.02	0.07	-0.01	-0.1
Q00657	Chondroitin sulfate proteoglycan 4 OS=Rattus norvegicus OX=10116 GN=Cspg4 PE=1 SV=2	24	1.062	1.246	0.957	1.074	1.045	1.337	1.047	1.082	1.026	0.983	0.09	0.32	-0.06	0.1	0.06	0.42	0.07	0.11	0.04	-0.02
A0A0G2JTB2	1,4-alpha-glucan branching enzyme OS=Rattus norvegicus OX=10116 GN=Gbe1 PE=1 SV=2	23	0.888	0.936	0.977	1.022	0.998	0.857	1.035	1.022	1.036	1.029	-0.17	-0.1	-0.03	0.03	0	-0.22	0.05	0.03	0.05	0.04
Q641Y8	ATP-dependent RNA helicase DDX1 OS=Rattus norvegicus OX=10116 GN=Ddx1 PE=1 SV=1	20	0.978	1.116	0.939	0.992	1.003	1.017	0.975	1.005	0.997	0.975	-0.03	0.16	-0.09	-0.01	0	0.02	-0.04	0.01	0	-0.04
Q6AZ35	Dync1i2 protein OS=Rattus norvegicus OX=10116 GN=Dync1i2 PE=1 SV=1	16	0.926	1.047	0.96	0.994	1.038	1.04	1.026	0.998	1.039	1.005	-0.11	0.07	-0.06	-0.01	0.05	0.06	0.04	0	0.06	0.01
A0A8I6GA62	NSFL1 cofactor p47 OS=Rattus norvegicus OX=10116 GN=Nsfl1c PE=1 SV=1	15	0.973	0.978	1.001	1.068	1.13	1.003	1.06	1.057	1.05	1.051	-0.04	-0.03	0	0.09	0.18	0	0.08	0.08	0.07	0.07
B2RYS8	NADH dehydrogenase [ubiquinone] 1 beta subcomplex subunit 8, mitochondrial OS=Rattus norvegicus OX=10116 GN=Ndufb8 PE=2 SV=1	10	1.038	0.858	0.967	0.941	1.02	0.746	1.038	1	1.038	1.081	0.05	-0.22	-0.05	-0.09	0.03	-0.42	0.05	0	0.05	0.11
Q5UAJ6	Cytochrome c oxidase subunit 2 OS=Rattus norvegicus OX=10116 GN=COX2 PE=3 SV=1	8	0.942	0.679	0.993	0.967	1.023	0.589	1.04	0.939	1.031	1.082	-0.09	-0.56	-0.01	-0.05	0.03	-0.76	0.06	-0.09	0.04	0.11
Q9R063	Peroxiredoxin-5, mitochondrial OS=Rattus norvegicus OX=10116 GN=Prdx5 PE=1 SV=1	13	0.89	0.714	1.008	1.014	1.057	0.795	1.073	0.959	1.012	1.056	-0.17	-0.49	0.01	0.02	0.08	-0.33	0.1	-0.06	0.02	0.08
Q6P7A7	Dolichyl-diphosphooligosaccharide--protein glycosyltransferase subunit 1 OS=Rattus norvegicus OX=10116 GN=Rpn1 PE=1 SV=1	23	1.004	1.089	1.148	0.984	0.923	1.266	0.907	0.973	0.918	0.981	0.01	0.12	0.2	-0.02	-0.12	0.34	-0.14	-0.04	-0.12	-0.03
B5DF57	protein-glutamine gamma-glutamyltransferase OS=Rattus norvegicus OX=10116 GN=Epb42 PE=1 SV=1	19	0.733	1.901	0.74	1.012	0.772	1.776	0.982	1.131	1.13	0.653	-0.45	0.93	-0.43	0.02	-0.37	0.83	-0.03	0.18	0.18	-0.62
A0A8I5ZNF1	Coatomer subunit alpha OS=Rattus norvegicus OX=10116 GN=Copa PE=1 SV=1	22	0.852	1.07	0.916	0.928	1.006	1.163	1.033	0.998	1.033	1.021	-0.23	0.1	-0.13	-0.11	0.01	0.22	0.05	0	0.05	0.03
A0A8I6GFI0	Decorin OS=Rattus norvegicus OX=10116 GN=Dcn PE=1 SV=1	17	0.81	1.318	0.871	0.927	0.882	1.625	0.911	1.101	0.907	0.897	-0.3	0.4	-0.2	-0.11	-0.18	0.7	-0.13	0.14	-0.14	-0.16
A0A0G2K896	Similar to RIKEN cDNA 1300017J02 OS=Rattus norvegicus OX=10116 GN=Inhca PE=1 SV=2	21	0.834	1.21	0.837	0.935	0.902	1.556	0.941	1.031	0.964	0.863	-0.26	0.27	-0.26	-0.1	-0.15	0.64	-0.09	0.04	-0.05	-0.21
P70623	Fatty acid-binding protein, adipocyte OS=Rattus norvegicus OX=10116 GN=Fabp4 PE=1 SV=3	11	0.92	0.813	1.05	1.011	1.014	1.109	1.055	0.928	0.976	1.066	-0.12	-0.3	0.07	0.02	0.02	0.15	0.08	-0.11	-0.04	0.09
A0A8I5ZZ13	inorganic diphosphatase OS=Rattus norvegicus OX=10116 GN=Ppa2 PE=1 SV=1	18	0.988	1.029	1.194	1.036	1.034	1.076	1.101	1.072	1.13	1.173	-0.02	0.04	0.26	0.05	0.05	0.11	0.14	0.1	0.18	0.23
A0A8I6AD55	Coiled-coil-helix-coiled-coil-helix domain containing 3 OS=Rattus norvegicus OX=10116 GN=Chchd3 PE=1 SV=1	14	1.07	0.8	1.124	1.076	1.122	0.702	1.109	1.026	1.034	1.08	0.1	-0.32	0.17	0.11	0.17	-0.51	0.15	0.04	0.05	0.11
O35796	Complement component 1 Q subcomponent-binding protein, mitochondrial OS=Rattus norvegicus OX=10116 GN=C1qbp PE=1 SV=2	9	0.607	0.516	1.094	0.69	1.006	0.583	1.248	0.897	1.217	1.448	-0.72	-0.95	0.13	-0.54	0.01	-0.78	0.32	-0.16	0.28	0.53
Q4QQV0	Tubulin beta chain OS=Rattus norvegicus OX=10116 GN=Tubb6 PE=1 SV=1	13	1.426	1.823	1.1	1.343	1.275	1.442	1.448	1.404	1.418	1.592	0.51	0.87	0.14	0.43	0.35	0.53	0.53	0.49	0.5	0.67
A0A0G2JSH9	Peroxiredoxin 2 OS=Rattus norvegicus OX=10116 GN=Prdx2 PE=1 SV=1	13	0.775	1.265	0.875	0.961	0.852	1.682	0.956	1.057	1.01	0.823	-0.37	0.34	-0.19	-0.06	-0.23	0.75	-0.06	0.08	0.01	-0.28
P10111	Peptidyl-prolyl cis-trans isomerase A OS=Rattus norvegicus OX=10116 GN=Ppia PE=1 SV=2	11	0.882	1.114	0.953	0.977	0.942	1.616	1.003	1.05	0.972	1.06	-0.18	0.16	-0.07	-0.03	-0.09	0.69	0	0.07	-0.04	0.08
P26453	Basigin OS=Rattus norvegicus OX=10116 GN=Bsg PE=1 SV=2	11	0.937	0.732	1.007	0.974	1.046	0.746	1.05	1.036	1.077	1.127	-0.09	-0.45	0.01	-0.04	0.06	-0.42	0.07	0.05	0.11	0.17
Q6P6T6	Cathepsin D OS=Rattus norvegicus OX=10116 GN=Ctsd PE=1 SV=1	12	0.953	1.055	0.949	1.016	0.988	0.948	1.043	0.992	0.993	1.017	-0.07	0.08	-0.08	0.02	-0.02	-0.08	0.06	-0.01	-0.01	0.02
Q06QA1	NADH-ubiquinone oxidoreductase chain 5 OS=Rattus norvegicus OX=10116 GN=ND5 PE=3 SV=1	12	1.059	0.593	1.168	0.978	1.082	0.497	0.956	0.84	0.885	0.92	0.08	-0.75	0.22	-0.03	0.11	-1.01	-0.06	-0.25	-0.18	-0.12
Q66H98	Caveolae-associated protein 2 OS=Rattus norvegicus OX=10116 GN=Cavin2 PE=1 SV=3	17	0.932	1.212	0.982	0.972	1.011	1.001	1.068	1.006	1.005	1.034	-0.1	0.28	-0.03	-0.04	0.02	0	0.09	0.01	0.01	0.05
A0A8L2QCF4	Transgelin OS=Rattus norvegicus OX=10116 GN=Tagln PE=1 SV=1	14	0.791	1.566	0.611	0.775	0.688	4.102	0.736	1.255	0.689	0.668	-0.34	0.65	-0.71	-0.37	-0.54	2.04	-0.44	0.33	-0.54	-0.58
A0A8I6GJ97	phosphopyruvate hydratase OS=Rattus norvegicus OX=10116 GN=ENSRNOG00000069456 PE=3 SV=1	13	1.048	0.9	1.164	1.168	1.186	0.975	1.209	1.14	1.112	0.926	0.07	-0.15	0.22	0.22	0.25	-0.04	0.27	0.19	0.15	-0.11
A0A8I5ZK55	NADH dehydrogenase [ubiquinone] iron-sulfur protein 4, mitochondrial OS=Rattus norvegicus OX=10116 GN=Ndufs4 PE=1 SV=1	9	0.917	0.618	1.047	0.935	1.022	0.575	1.086	0.935	1.012	1.146	-0.12	-0.69	0.07	-0.1	0.03	-0.8	0.12	-0.1	0.02	0.2
Q63570	26S proteasome regulatory subunit 6B OS=Rattus norvegicus OX=10116 GN=Psmc4 PE=1 SV=1	15	0.838	1.065	0.925	0.945	1.029	1.076	1.038	1.033	1.056	1.005	-0.26	0.09	-0.11	-0.08	0.04	0.11	0.05	0.05	0.08	0.01
A1L1M0	cAMP-dependent protein kinase OS=Rattus norvegicus OX=10116 GN=Prkaca PE=1 SV=1	19	0.784	0.774	0.997	0.87	1.012	0.834	1.052	0.989	1.045	1.095	-0.35	-0.37	0	-0.2	0.02	-0.26	0.07	-0.02	0.06	0.13
P21807	Peripherin OS=Rattus norvegicus OX=10116 GN=Prph PE=1 SV=1	20	0.943	1.784	0.892	0.894	0.934	1.684	0.873	1.409	0.87	0.892	-0.08	0.84	-0.17	-0.16	-0.1	0.75	-0.2	0.49	-0.2	-0.16
D4A830	inorganic diphosphatase OS=Rattus norvegicus OX=10116 GN=Ppa2 PE=1 SV=3	18	0.928	0.903	0.987	1.001	1.04	0.808	1.054	0.941	0.992	1.007	-0.11	-0.15	-0.02	0	0.06	-0.31	0.08	-0.09	-0.01	0.01
B2GVB3	Actn3 protein OS=Rattus norvegicus OX=10116 GN=Actn3 PE=2 SV=1	15	1.284	0.973	0.8	0.828	0.88	0.865	1.272	1.636	1.232	1.903	0.36	-0.04	-0.32	-0.27	-0.18	-0.21	0.35	0.71	0.3	0.93
Q5U2S7	Proteasome (Prosome, macropain) 26S subunit, non-ATPase, 3 OS=Rattus norvegicus OX=10116 GN=Psmd3 PE=1 SV=1	20	0.863	1.076	0.941	0.893	1.036	1.003	1.06	1.052	1.106	1.055	-0.21	0.11	-0.09	-0.16	0.05	0	0.08	0.07	0.14	0.08
P12368	cAMP-dependent protein kinase type II-alpha regulatory subunit OS=Rattus norvegicus OX=10116 GN=Prkar2a PE=1 SV=4	18	0.914	0.875	0.979	0.978	1.037	0.831	1.08	1.017	1.045	1.071	-0.13	-0.19	-0.03	-0.03	0.05	-0.27	0.11	0.02	0.06	0.1
G3V9R9	Afamin OS=Rattus norvegicus OX=10116 GN=Afm PE=1 SV=1	18	1.06	1.268	0.835	0.956	0.832	1.887	0.916	1.094	0.993	0.858	0.08	0.34	-0.26	-0.07	-0.27	0.92	-0.13	0.13	-0.01	-0.22
A0A8I6AJT8	LIM and calponin homology domains 1 OS=Rattus norvegicus OX=10116 GN=Limch1 PE=1 SV=1	27	1.033	0.992	0.995	1.052	1.03	0.799	0.993	1.049	1.009	1.032	0.05	-0.01	-0.01	0.07	0.04	-0.32	-0.01	0.07	0.01	0.04
A0A8I5ZR65	Ecm29 proteasome adaptor and scaffold OS=Rattus norvegicus OX=10116 GN=Ecpas PE=1 SV=1	22	1.144	1.106	0.912	0.971	1.045	1.016	1.05	1.401	1.013	1.497	0.19	0.15	-0.13	-0.04	0.06	0.02	0.07	0.49	0.02	0.58
P09495	Tropomyosin alpha-4 chain OS=Rattus norvegicus OX=10116 GN=Tpm4 PE=1 SV=3	18	0.79	1.109	0.896	0.724	0.994	0.895	1.015	0.822	1.19	1.279	-0.34	0.15	-0.16	-0.47	-0.01	-0.16	0.02	-0.28	0.25	0.36
Q5I0G4	Glycine--tRNA ligase OS=Rattus norvegicus OX=10116 GN=Gars1 PE=1 SV=2	20	0.933	0.954	0.958	1.027	1.017	0.879	1.009	0.992	1.015	0.989	-0.1	-0.07	-0.06	0.04	0.02	-0.19	0.01	-0.01	0.02	-0.02
A0A8I5Y544	Muscular LMNA-interacting protein OS=Rattus norvegicus OX=10116 GN=Mlip PE=4 SV=1	20	1.011	0.872	0.995	0.989	1.026	0.764	1.019	1.086	1.016	1.189	0.02	-0.2	-0.01	-0.02	0.04	-0.39	0.03	0.12	0.02	0.25
Q63362	NADH dehydrogenase [ubiquinone] 1 alpha subcomplex subunit 5 OS=Rattus norvegicus OX=10116 GN=Ndufa5 PE=1 SV=3	10	1.126	0.78	1.115	1.011	1.102	0.592	1.024	0.988	1.005	1.013	0.17	-0.36	0.16	0.02	0.14	-0.76	0.03	-0.02	0.01	0.02
A0A0G2K9Y5	RCG36507, isoform CRA_a OS=Rattus norvegicus OX=10116 GN=LOC681544 PE=1 SV=2	14	0.825	1.491	0.936	0.967	0.767	1.944	1.036	1.156	0.893	0.717	-0.28	0.58	-0.1	-0.05	-0.38	0.96	0.05	0.21	-0.16	-0.48
D3ZFQ8	Cytochrome c-1 OS=Rattus norvegicus OX=10116 GN=Cyc1 PE=3 SV=4	12	0.919	0.72	1.07	1.003	1.044	0.673	1.135	0.97	1.025	1.145	-0.12	-0.47	0.1	0	0.06	-0.57	0.18	-0.04	0.03	0.2
D4AE56	Prostaglandin E synthase 2 OS=Rattus norvegicus OX=10116 GN=Ptges2 PE=1 SV=1	15	0.965	0.752	0.992	1.027	1.057	0.673	1.035	0.958	1.005	1.048	-0.05	-0.41	-0.01	0.04	0.08	-0.57	0.05	-0.06	0.01	0.07
A0A0G2JSL8	Adenosine kinase OS=Rattus norvegicus OX=10116 GN=Adk PE=1 SV=1	13	0.885	0.834	0.989	1.043	1.104	0.762	1.039	0.985	1.009	1.02	-0.18	-0.26	-0.02	0.06	0.14	-0.39	0.05	-0.02	0.01	0.03
Q7TP38	Amine oxidase OS=Rattus norvegicus OX=10116 PE=2 SV=1	16	0.758	1.418	0.818	0.921	0.92	2.462	0.939	1.036	0.891	0.909	-0.4	0.5	-0.29	-0.12	-0.12	1.3	-0.09	0.05	-0.17	-0.14
P15205	Microtubule-associated protein 1B OS=Rattus norvegicus OX=10116 GN=Map1b PE=1 SV=3	28	0.823	1.142	0.925	0.873	0.944	1.675	0.987	1.051	0.992	0.976	-0.28	0.19	-0.11	-0.2	-0.08	0.74	-0.02	0.07	-0.01	-0.03
P52481	Adenylyl cyclase-associated protein 2 OS=Rattus norvegicus OX=10116 GN=Cap2 PE=1 SV=1	16	0.96	1.236	0.957	0.995	0.985	1.055	1.032	0.974	0.976	0.966	-0.06	0.31	-0.06	-0.01	-0.02	0.08	0.05	-0.04	-0.04	-0.05
A0A8I6A2H9	Twinfilin actin-binding protein 2 OS=Rattus norvegicus OX=10116 GN=Twf2 PE=1 SV=1	15	1.088	0.771	1.022	0.943	1.082	0.726	1.058	0.926	1.086	1.123	0.12	-0.38	0.03	-0.08	0.11	-0.46	0.08	-0.11	0.12	0.17
A0A8I6A592	Actin-binding LIM protein 1 OS=Rattus norvegicus OX=10116 GN=Ablim1 PE=1 SV=1	25	1.293	0.83	0.988	0.966	0.941	0.694	0.936	1.145	1.08	1.06	0.37	-0.27	-0.02	-0.05	-0.09	-0.53	-0.1	0.2	0.11	0.08
P23514	Coatomer subunit beta OS=Rattus norvegicus OX=10116 GN=Copb1 PE=1 SV=1	18	0.922	1.242	0.904	0.972	1.014	1.297	1.022	1.058	1.048	0.992	-0.12	0.31	-0.14	-0.04	0.02	0.38	0.03	0.08	0.07	-0.01
P19804	Nucleoside diphosphate kinase B OS=Rattus norvegicus OX=10116 GN=Nme2 PE=1 SV=1	12	0.977	0.842	1.032	1.086	1.093	0.745	1.006	0.975	0.977	1.023	-0.03	-0.25	0.05	0.12	0.13	-0.43	0.01	-0.04	-0.03	0.03
A0A8I5ZUK2	Ubiquitin associated protein 2-like OS=Rattus norvegicus OX=10116 GN=Ubap2l PE=1 SV=1	18	1.013	0.925	0.968	1.047	1.085	0.787	0.996	1.043	0.991	1	0.02	-0.11	-0.05	0.07	0.12	-0.34	-0.01	0.06	-0.01	0
Q5M7V3	LOC367586 protein OS=Rattus norvegicus OX=10116 GN=LOC367586 PE=2 SV=1	15	1.092	1.782	0.684	0.809	0.945	0.908	0.964	1.12	1.214	0.729	0.13	0.83	-0.55	-0.31	-0.08	-0.14	-0.05	0.16	0.28	-0.46
Q08163	Adenylyl cyclase-associated protein 1 OS=Rattus norvegicus OX=10116 GN=Cap1 PE=1 SV=3	13	0.83	1.286	0.839	0.952	0.926	1.972	0.904	0.944	0.906	0.836	-0.27	0.36	-0.25	-0.07	-0.11	0.98	-0.15	-0.08	-0.14	-0.26
Q4PP99	Cardiac troponin C OS=Rattus norvegicus OX=10116 GN=Tnnc1 PE=2 SV=1	9	0.649	0.626	1.056	0.849	1.04	0.455	1.233	0.998	1.154	1.245	-0.62	-0.67	0.08	-0.24	0.06	-1.14	0.3	0	0.21	0.32
G3V913	Heat shock protein beta-1 OS=Rattus norvegicus OX=10116 GN=Hspb1 PE=1 SV=1	14	0.875	1.216	0.875	0.899	0.956	1.058	1.01	1.061	1.004	0.986	-0.19	0.28	-0.19	-0.15	-0.07	0.08	0.01	0.09	0.01	-0.02
A0A8I6AJ88	RAB1A, member RAS oncogene family OS=Rattus norvegicus OX=10116 GN=Rab1a PE=1 SV=1	15	0.911	1.101	0.968	0.977	1.016	1.125	1.031	0.965	1.011	1.008	-0.13	0.14	-0.05	-0.03	0.02	0.17	0.04	-0.05	0.02	0.01
A0A8I6A0U2	Peroxiredoxin 3 OS=Rattus norvegicus OX=10116 GN=Prdx3 PE=1 SV=1	13	0.932	0.705	1.053	0.988	1.077	0.653	1.069	0.959	0.998	1.042	-0.1	-0.5	0.07	-0.02	0.11	-0.61	0.1	-0.06	0	0.06
Q9Z270	Vesicle-associated membrane protein-associated protein A OS=Rattus norvegicus OX=10116 GN=Vapa PE=1 SV=3	13	0.956	0.989	0.961	0.985	1.016	0.941	1.015	0.987	0.965	0.973	-0.06	-0.02	-0.06	-0.02	0.02	-0.09	0.02	-0.02	-0.05	-0.04
A0A8L2QLE0	Family with sequence similarity 162, member A OS=Rattus norvegicus OX=10116 GN=Fam162a PE=1 SV=1	11	1.062	0.755	1.049	1.021	1.075	0.599	1.04	0.95	0.996	1.04	0.09	-0.41	0.07	0.03	0.1	-0.74	0.06	-0.07	-0.01	0.06
A0A8I6ABZ7	RNA helicase OS=Rattus norvegicus OX=10116 GN=Dhx9 PE=1 SV=1	19	1.019	1.026	0.971	1.011	0.947	1.05	0.973	1.025	1.059	1	0.03	0.04	-0.04	0.02	-0.08	0.07	-0.04	0.04	0.08	0
A0A1U7AGA3	Cytochrome c oxidase subunit 1 OS=Rattus nitidus OX=508668 GN=COX1 PE=3 SV=1	7	0.551	0.429	0.879	0.704	0.968	0.55	0.782	0.748	0.853	0.852	-0.86	-1.22	-0.19	-0.51	-0.05	-0.86	-0.36	-0.42	-0.23	-0.23
A0A8I5ZP70	Target of myb1 like 2 membrane trafficking protein OS=Rattus norvegicus OX=10116 GN=Tom1l2 PE=1 SV=1	16	0.876	0.908	0.959	0.972	1.103	0.843	0.998	0.98	0.981	0.98	-0.19	-0.14	-0.06	-0.04	0.14	-0.25	0	-0.03	-0.03	-0.03
A0A8I5ZRB4	Transgelin OS=Rattus norvegicus OX=10116 GN=Tagln2 PE=1 SV=1	9	0.974	1.144	0.862	0.987	0.997	1.428	0.99	1.057	0.969	0.9	-0.04	0.19	-0.21	-0.02	0	0.51	-0.02	0.08	-0.05	-0.15
D4A8F2	RCG55799, isoform CRA_a OS=Rattus norvegicus OX=10116 GN=Rsu1 PE=1 SV=4	14	0.85	0.979	0.947	0.989	1.085	1.086	0.978	0.972	0.949	0.966	-0.24	-0.03	-0.08	-0.02	0.12	0.12	-0.03	-0.04	-0.08	-0.05
A0A8I6GKR4	High mobility group protein B1-like OS=Rattus norvegicus OX=10116 GN=LOC120099223 PE=3 SV=1	13	0.703	0.889	0.898	0.874	0.857	0.825	1.032	0.832	1.035	1.1	-0.51	-0.17	-0.15	-0.2	-0.22	-0.28	0.05	-0.27	0.05	0.14
A0A8L2QTB7	Cytochrome c oxidase subunit 7A2 OS=Rattus norvegicus OX=10116 GN=Cox7a2 PE=1 SV=1	5	0.896	0.735	0.937	0.937	1.051	0.693	1.008	0.915	0.97	0.96	-0.16	-0.44	-0.09	-0.09	0.07	-0.53	0.01	-0.13	-0.04	-0.06
D3ZUX7	Acyl-CoA synthetase family member 3 OS=Rattus norvegicus OX=10116 GN=Acsf3 PE=1 SV=1	16	0.741	0.63	1.036	0.865	1.09	0.625	1.132	1.083	1.112	1.094	-0.43	-0.67	0.05	-0.21	0.12	-0.68	0.18	0.12	0.15	0.13
D4A7L4	NADH dehydrogenase [ubiquinone] 1 beta subcomplex subunit 11, mitochondrial OS=Rattus norvegicus OX=10116 GN=Ndufb11 PE=1 SV=1	7	0.986	0.843	1	1.049	1.087	0.773	1.064	1.048	1.084	1.066	-0.02	-0.25	0	0.07	0.12	-0.37	0.09	0.07	0.12	0.09
A0A0G2JSR7	Matrin 3 OS=Rattus norvegicus OX=10116 GN=Matr3 PE=1 SV=1	18	0.834	0.935	0.98	0.888	1.034	0.909	1.061	1.032	1.057	1.091	-0.26	-0.1	-0.03	-0.17	0.05	-0.14	0.08	0.05	0.08	0.13
P51886	Lumican OS=Rattus norvegicus OX=10116 GN=Lum PE=1 SV=1	13	0.751	1.05	0.769	0.832	0.896	2.328	0.973	1.16	0.978	0.918	-0.41	0.07	-0.38	-0.26	-0.16	1.22	-0.04	0.21	-0.03	-0.12
A0A8I6AH91	Poly(rC) binding protein 1 OS=Rattus norvegicus OX=10116 GN=Pcbp1 PE=1 SV=1	14	0.823	0.926	0.938	0.949	1.016	1.02	0.998	0.948	1.005	1.051	-0.28	-0.11	-0.09	-0.08	0.02	0.03	0	-0.08	0.01	0.07
A0A0G2K0Z1	Flotillin OS=Rattus norvegicus OX=10116 GN=Flot2 PE=1 SV=1	18	0.994	1.256	0.904	0.927	1.079	0.774	0.969	1.046	0.986	1.017	-0.01	0.33	-0.14	-0.11	0.11	-0.37	-0.05	0.06	-0.02	0.02
A0A8I6A745	Four and a half LIM domains 1 OS=Rattus norvegicus OX=10116 GN=Fhl1 PE=1 SV=1	16	0.806	0.859	1.01	0.805	0.901	1.596	1.055	0.903	1.022	1.066	-0.31	-0.22	0.01	-0.31	-0.15	0.67	0.08	-0.15	0.03	0.09
A0A8I6A2Y6	Protein kinase C and casein kinase substrate in neurons 2 OS=Rattus norvegicus OX=10116 GN=Pacsin2 PE=1 SV=1	18	0.94	0.701	1.068	0.981	1.091	0.685	1.095	0.977	1.041	1.064	-0.09	-0.51	0.09	-0.03	0.13	-0.54	0.13	-0.03	0.06	0.09
E9PU28	Inosine-5'-monophosphate dehydrogenase 2 OS=Rattus norvegicus OX=10116 GN=Impdh2 PE=1 SV=1	18	0.921	1.287	0.856	1.001	0.921	1.286	0.954	1.045	1.032	0.881	-0.12	0.36	-0.22	0	-0.12	0.36	-0.07	0.06	0.05	-0.18
A0A0G2KB09	Parvin, beta OS=Rattus norvegicus OX=10116 GN=Parvb PE=1 SV=1	14	0.925	0.965	1	0.971	1.07	0.783	1.051	1.03	1.098	1.071	-0.11	-0.05	0	-0.04	0.1	-0.35	0.07	0.04	0.13	0.1
A0A8I5ZUT0	Kynurenine aminotransferase 3 OS=Rattus norvegicus OX=10116 GN=Kyat3 PE=1 SV=1	14	0.95	0.94	0.961	1.017	1.021	0.905	0.983	0.971	0.997	1.044	-0.07	-0.09	-0.06	0.02	0.03	-0.14	-0.02	-0.04	0	0.06
A0A8L2UK17	Ribosomal protein SA OS=Rattus norvegicus OX=10116 GN=Rpsa PE=1 SV=1	14	1.075	1.167	0.995	1.091	1.073	0.928	1.009	1.013	0.982	1.002	0.1	0.22	-0.01	0.13	0.1	-0.11	0.01	0.02	-0.03	0
Q566E4	Heterogeneous nuclear ribonucleoprotein R OS=Rattus norvegicus OX=10116 GN=Hnrnpr PE=1 SV=1	18	0.965	1.028	0.958	0.996	1.033	1.001	1.022	0.986	1.02	1.02	-0.05	0.04	-0.06	-0.01	0.05	0	0.03	-0.02	0.03	0.03
Q5XI21	Target of myb1 homolog (Chicken) OS=Rattus norvegicus OX=10116 GN=Tom1 PE=1 SV=1	14	0.934	1.146	0.94	1.067	1.039	1.055	1.001	1.069	1.023	0.987	-0.1	0.2	-0.09	0.09	0.06	0.08	0	0.1	0.03	-0.02
F1LRI5	GCN1 activator of EIF2AK4 OS=Rattus norvegicus OX=10116 GN=Gcn1 PE=1 SV=3	23	1.026	1.042	0.932	1.025	1.057	0.976	1.033	1.03	1.023	1.052	0.04	0.06	-0.1	0.04	0.08	-0.03	0.05	0.04	0.03	0.07
Q5M9H7	DnaJ (Hsp40) homolog, subfamily A, member 2 OS=Rattus norvegicus OX=10116 GN=Dnaja2 PE=1 SV=1	17	0.885	0.919	0.935	0.917	0.988	0.971	0.983	0.989	1.002	1.014	-0.18	-0.12	-0.1	-0.13	-0.02	-0.04	-0.03	-0.02	0	0.02
A0A140TAB9	Protein-L-isoaspartate O-methyltransferase OS=Rattus norvegicus OX=10116 GN=Pcmt1 PE=3 SV=2	12	1.029	1.072	0.991	1.048	1.004	0.96	1.006	1.004	0.968	0.952	0.04	0.1	-0.01	0.07	0.01	-0.06	0.01	0.01	-0.05	-0.07
A0A8I6A4E3	Protein 4.1 OS=Rattus norvegicus OX=10116 GN=Epb41 PE=1 SV=1	18	0.905	1.778	0.812	1.13	0.8	1.704	1.103	1.245	1.361	0.981	-0.14	0.83	-0.3	0.18	-0.32	0.77	0.14	0.32	0.44	-0.03
O08815	STE20-like serine/threonine-protein kinase OS=Rattus norvegicus OX=10116 GN=Slk PE=1 SV=1	21	0.883	1.238	0.959	1.003	1.026	1.436	1.036	1.031	1.043	1.001	-0.18	0.31	-0.06	0	0.04	0.52	0.05	0.04	0.06	0
A0A0G2K2B3	KH-type splicing regulatory protein OS=Rattus norvegicus OX=10116 GN=Khsrp PE=1 SV=1	19	0.899	1.212	0.884	1	0.996	1.242	1.002	1.057	1.018	0.978	-0.15	0.28	-0.18	0	-0.01	0.31	0	0.08	0.03	-0.03
Q63258	Integrin alpha-7 OS=Rattus norvegicus OX=10116 GN=Itga7 PE=1 SV=2	21	1.029	1.003	0.976	1.055	1.058	0.803	1.036	1.023	0.986	0.992	0.04	0	-0.04	0.08	0.08	-0.32	0.05	0.03	-0.02	-0.01
A0A0G2JXK2	B-cell receptor-associated protein OS=Rattus norvegicus OX=10116 GN=Bcap31 PE=1 SV=1	16	0.982	1.417	0.913	0.968	0.991	1.178	0.948	0.921	0.951	0.924	-0.03	0.5	-0.13	-0.05	-0.01	0.24	-0.08	-0.12	-0.07	-0.11
A0A8L2Q2H9	Nucleophosmin OS=Rattus norvegicus OX=10116 GN=Npm1 PE=1 SV=1	14	0.894	0.914	0.927	0.925	0.956	0.908	1.062	1.016	1.063	1.078	-0.16	-0.13	-0.11	-0.11	-0.07	-0.14	0.09	0.02	0.09	0.11
P24473	Glutathione S-transferase kappa 1 OS=Rattus norvegicus OX=10116 GN=Gstk1 PE=1 SV=3	13	0.923	0.844	0.951	0.927	1.026	0.746	1.012	1.03	1.033	1.03	-0.12	-0.24	-0.07	-0.11	0.04	-0.42	0.02	0.04	0.05	0.04
A0A0G2JYR5	Rho GTPase activating protein 1 OS=Rattus norvegicus OX=10116 GN=Arhgap1 PE=1 SV=1	14	0.878	1.508	0.873	0.933	0.952	1.369	0.964	0.958	0.958	0.998	-0.19	0.59	-0.2	-0.1	-0.07	0.45	-0.05	-0.06	-0.06	0
A0A0G2JSH2	3-hydroxybutyrate dehydrogenase 1 OS=Rattus norvegicus OX=10116 GN=Bdh1 PE=1 SV=1	14	0.855	0.569	1.16	0.852	0.98	0.551	1.117	0.868	1.152	1.348	-0.23	-0.81	0.21	-0.23	-0.03	-0.86	0.16	-0.2	0.2	0.43
A0A0G2JUC7	Dynactin subunit 2 OS=Rattus norvegicus OX=10116 GN=Dctn2 PE=1 SV=1	17	0.995	1.161	0.946	0.976	1.016	1.025	1.027	1.033	0.988	0.977	-0.01	0.22	-0.08	-0.04	0.02	0.04	0.04	0.05	-0.02	-0.03
A0A0G2JX81	Catenin alpha 3 OS=Rattus norvegicus OX=10116 GN=Ctnna3 PE=1 SV=1	17	1.035	0.929	1.103	0.959	1.06	0.869	1.033	1	0.988	1.024	0.05	-0.11	0.14	-0.06	0.08	-0.2	0.05	0	-0.02	0.03
A0A8L2RAQ3	Gelsolin OS=Rattus norvegicus OX=10116 GN=Gsn PE=1 SV=1	18	1.012	3.015	0.599	0.812	0.7	3.136	0.67	0.826	0.716	0.596	0.02	1.59	-0.74	-0.3	-0.51	1.65	-0.58	-0.28	-0.48	-0.75
B2RZD6	NDUFA4, mitochondrial complex associated OS=Rattus norvegicus OX=10116 GN=Ndufa4 PE=1 SV=1	11	1.059	0.76	1.064	1.008	1.082	0.589	1.096	1.079	1.041	1.122	0.08	-0.4	0.09	0.01	0.11	-0.76	0.13	0.11	0.06	0.17
A0A8I5ZPY8	NADH dehydrogenase [ubiquinone] 1 beta subcomplex subunit 4 OS=Rattus norvegicus OX=10116 GN=Ndufb4 PE=1 SV=1	8	0.865	0.692	1.007	0.968	1.058	0.625	0.996	0.918	0.938	0.961	-0.21	-0.53	0.01	-0.05	0.08	-0.68	-0.01	-0.12	-0.09	-0.06
A0A0G2K4Y1	DnaJ heat shock protein family (Hsp40) member A3 OS=Rattus norvegicus OX=10116 GN=Dnaja3 PE=1 SV=1	14	1.387	1.068	1.206	1.172	1.149	0.867	1.278	1.474	1.306	1.256	0.47	0.1	0.27	0.23	0.2	-0.21	0.35	0.56	0.38	0.33
G3V699	SEC31 homolog A, COPII coat complex component OS=Rattus norvegicus OX=10116 GN=Sec31a PE=1 SV=1	21	0.967	1.245	0.956	0.982	0.984	1.181	0.983	0.991	1.003	0.988	-0.05	0.32	-0.07	-0.03	-0.02	0.24	-0.02	-0.01	0	-0.02
F1LNJ2	U5 small nuclear ribonucleoprotein 200 kDa helicase OS=Rattus norvegicus OX=10116 GN=Snrnp200 PE=1 SV=1	24	0.914	0.912	1.059	0.956	1.02	1.068	1.116	1.034	1.091	1.159	-0.13	-0.13	0.08	-0.07	0.03	0.1	0.16	0.05	0.13	0.21
Q6AY99	Aldo-keto reductase family 1, member B10 (Aldose reductase) OS=Rattus norvegicus OX=10116 GN=Akr1b10 PE=1 SV=1	16	0.846	0.775	1.046	0.953	1.027	0.767	1.026	0.943	1.037	1.121	-0.24	-0.37	0.06	-0.07	0.04	-0.38	0.04	-0.08	0.05	0.17
A0A0A0MXW1	2-oxoisovalerate dehydrogenase subunit beta, mitochondrial OS=Rattus norvegicus OX=10116 GN=Bckdhb PE=1 SV=1	10	0.786	0.598	1.064	0.898	1.046	0.688	1.109	0.908	1.057	1.165	-0.35	-0.74	0.09	-0.16	0.06	-0.54	0.15	-0.14	0.08	0.22
A0A0G2JYN3	Leucyl and cystinyl aminopeptidase OS=Rattus norvegicus OX=10116 GN=Lnpep PE=1 SV=2	18	1.012	1.175	0.957	1.019	1.044	1.05	1.014	1.045	1.064	0.978	0.02	0.23	-0.06	0.03	0.06	0.07	0.02	0.06	0.09	-0.03
P97584	Prostaglandin reductase 1 OS=Rattus norvegicus OX=10116 GN=Ptgr1 PE=1 SV=3	13	0.804	0.99	0.905	0.928	0.991	1.074	1.001	0.909	0.985	1.05	-0.31	-0.01	-0.14	-0.11	-0.01	0.1	0	-0.14	-0.02	0.07
P07872	Peroxisomal acyl-coenzyme A oxidase 1 OS=Rattus norvegicus OX=10116 GN=Acox1 PE=1 SV=1	17	1.042	0.838	0.995	1.075	1.141	0.707	0.96	0.986	0.998	1.034	0.06	-0.26	-0.01	0.1	0.19	-0.5	-0.06	-0.02	0	0.05
Q9Z1E1	Flotillin-1 OS=Rattus norvegicus OX=10116 GN=Flot1 PE=2 SV=2	18	0.938	1.044	0.962	0.984	1.031	0.916	1.038	1.054	1.065	1.031	-0.09	0.06	-0.06	-0.02	0.04	-0.13	0.05	0.08	0.09	0.04
A0A8L2QB18	Pyridine nucleotide-disulphide oxidoreductase domain 2 OS=Rattus norvegicus OX=10116 GN=Pyroxd2 PE=1 SV=1	16	0.839	0.864	0.934	1.004	1.067	0.776	1.047	1.024	1.072	1.018	-0.25	-0.21	-0.1	0.01	0.09	-0.37	0.07	0.03	0.1	0.03
A0A0G2K3G0	Histidine-rich glycoprotein OS=Rattus norvegicus OX=10116 GN=Hrg PE=1 SV=1	15	0.835	1.116	1.184	0.962	0.893	1.28	1.067	1.013	0.925	0.913	-0.26	0.16	0.24	-0.06	-0.16	0.36	0.09	0.02	-0.11	-0.13
G3V8L9	Caveolae-associated protein 1 OS=Rattus norvegicus OX=10116 GN=Cavin1 PE=1 SV=2	10	0.948	0.344	1.022	0.948	1.112	0.352	1.016	0.91	1	1.092	-0.08	-1.54	0.03	-0.08	0.15	-1.5	0.02	-0.14	0	0.13
A0A8I6G5P0	Eukaryotic translation initiation factor 2 subunit beta OS=Rattus norvegicus OX=10116 GN=Eif2s2 PE=1 SV=1	14	0.953	0.984	1.033	1.016	1.107	0.882	1.024	1.057	1.034	1.059	-0.07	-0.02	0.05	0.02	0.15	-0.18	0.03	0.08	0.05	0.08
G3V7L6	Proteasome (Prosome, macropain) 26S subunit, ATPase 2, isoform CRA_d OS=Rattus norvegicus OX=10116 GN=Psmc2 PE=1 SV=1	20	0.949	1.112	0.918	0.951	0.977	1.145	0.994	1.035	1.011	0.946	-0.08	0.15	-0.12	-0.07	-0.03	0.2	-0.01	0.05	0.02	-0.08
B0BNN3	Carbonic anhydrase 1 OS=Rattus norvegicus OX=10116 GN=Ca1 PE=1 SV=1	12	0.917	1.674	0.706	0.892	0.79	1.444	0.984	1.195	1.106	0.675	-0.12	0.74	-0.5	-0.17	-0.34	0.53	-0.02	0.26	0.15	-0.57
A0A0G2K866	ATP binding cassette subfamily B member 7 OS=Rattus norvegicus OX=10116 GN=Abcb7 PE=1 SV=2	14	0.843	0.865	0.949	0.905	1.003	0.74	1.042	0.961	1.03	1.068	-0.25	-0.21	-0.07	-0.14	0	-0.43	0.06	-0.06	0.04	0.09
G3V9G4	ATP-citrate synthase OS=Rattus norvegicus OX=10116 GN=Acly PE=1 SV=1	20	0.817	1.272	0.837	0.967	0.863	2.109	0.968	1.076	0.947	0.854	-0.29	0.35	-0.26	-0.05	-0.21	1.08	-0.05	0.11	-0.08	-0.23
Q6P2A5	GTP:AMP phosphotransferase AK3, mitochondrial OS=Rattus norvegicus OX=10116 GN=Ak3 PE=1 SV=1	15	0.882	0.942	0.97	0.889	1.038	0.977	1.05	1.018	1.08	1.073	-0.18	-0.09	-0.04	-0.17	0.05	-0.03	0.07	0.03	0.11	0.1
Q6IMZ5	Tropomodulin 1 OS=Rattus norvegicus OX=10116 GN=Tmod1 PE=1 SV=1	15	2.504	1.783	0.814	1	0.823	0.974	0.741	0.78	0.838	0.693	1.32	0.83	-0.3	0	-0.28	-0.04	-0.43	-0.36	-0.26	-0.53
A0A8I5ZWQ0	Kininogen 2 OS=Rattus norvegicus OX=10116 GN=Kng2 PE=1 SV=1	16	0.748	1.173	0.816	0.827	0.808	2.247	0.921	1.137	0.983	0.907	-0.42	0.23	-0.29	-0.27	-0.31	1.17	-0.12	0.19	-0.02	-0.14
Q5I0D1	Glyoxalase domain-containing protein 4 OS=Rattus norvegicus OX=10116 GN=Glod4 PE=1 SV=1	15	1.029	1.13	0.904	1.057	0.997	1.078	0.994	0.987	0.989	0.934	0.04	0.18	-0.15	0.08	0	0.11	-0.01	-0.02	-0.02	-0.1
A0A8I6A4J2	AP-2 complex subunit alpha OS=Rattus norvegicus OX=10116 GN=Ap2a1 PE=1 SV=1	17	1.014	1.151	0.908	1.051	1.088	1.086	1.017	1.111	1.014	0.996	0.02	0.2	-0.14	0.07	0.12	0.12	0.02	0.15	0.02	-0.01
Q5U3Z7	Serine hydroxymethyltransferase OS=Rattus norvegicus OX=10116 GN=Shmt2 PE=1 SV=1	17	0.997	1.049	0.949	0.99	1.002	1.007	0.961	0.972	0.974	0.984	0	0.07	-0.08	-0.01	0	0.01	-0.06	-0.04	-0.04	-0.02
A0A0G2K7M1	Glyceraldehyde-3-phosphate dehydrogenase OS=Rattus norvegicus OX=10116 GN=AABR07030729.1 PE=1 SV=1	9	0.875	0.885	0.925	0.975	1.018	0.672	1.017	1.039	1.098	1.029	-0.19	-0.18	-0.11	-0.04	0.03	-0.57	0.02	0.05	0.13	0.04
Q9EPH1	Alpha-1B-glycoprotein OS=Rattus norvegicus OX=10116 GN=A1bg PE=2 SV=2	16	1.102	1.268	0.682	0.995	1.052	1.694	0.878	0.803	0.98	0.97	0.14	0.34	-0.55	-0.01	0.07	0.76	-0.19	-0.32	-0.03	-0.04
G3V7T6	Splicing factor 3b, subunit 1 OS=Rattus norvegicus OX=10116 GN=Sf3b1 PE=1 SV=1	18	0.901	1.466	0.927	0.945	0.95	1.033	1.052	1.067	1.073	1.028	-0.15	0.55	-0.11	-0.08	-0.07	0.05	0.07	0.09	0.1	0.04
B5DFC8	Eukaryotic translation initiation factor 3 subunit C OS=Rattus norvegicus OX=10116 GN=Eif3c PE=1 SV=1	20	0.959	1.145	0.954	0.991	0.985	1.084	1.051	1.26	1.036	1.062	-0.06	0.2	-0.07	-0.01	-0.02	0.12	0.07	0.33	0.05	0.09
Q80X03	Alpha-crystallin B chain (Fragment) OS=Rattus sp OX=10118 PE=2 SV=1	10	0.979	0.877	1.079	0.942	1.07	0.776	1.101	1	1.066	1.075	-0.03	-0.19	0.11	-0.09	0.1	-0.37	0.14	0	0.09	0.1
Q66H61	Glutamine--tRNA ligase OS=Rattus norvegicus OX=10116 GN=Qars1 PE=1 SV=1	19	0.882	0.979	0.929	0.906	1	0.984	1.038	1.042	1.027	1.033	-0.18	-0.03	-0.11	-0.14	0	-0.02	0.05	0.06	0.04	0.05
P15865	Histone H1.4 OS=Rattus norvegicus OX=10116 GN=H1-4 PE=1 SV=3	17	1.232	1.141	1.181	1.238	1.082	0.992	0.861	0.99	0.815	0.848	0.3	0.19	0.24	0.31	0.11	-0.01	-0.22	-0.01	-0.3	-0.24
Q6AXS5	Plasminogen activator inhibitor 1 RNA-binding protein OS=Rattus norvegicus OX=10116 GN=Serbp1 PE=1 SV=2	17	0.901	0.881	0.999	0.987	0.988	0.8	1.046	1.031	1.035	1.109	-0.15	-0.18	0	-0.02	-0.02	-0.32	0.06	0.04	0.05	0.15
A0A0G2K014	Lymphocyte cytosolic protein 1 OS=Rattus norvegicus OX=10116 GN=Lcp1 PE=1 SV=1	18	0.977	0.952	0.899	0.997	1.071	0.95	0.973	0.958	1.052	0.947	-0.03	-0.07	-0.15	0	0.1	-0.07	-0.04	-0.06	0.07	-0.08
A0A8I5Y6S6	pyrroline-5-carboxylate reductase OS=Rattus norvegicus OX=10116 GN=Pycr3 PE=1 SV=1	14	0.916	0.763	0.945	0.901	1.004	0.818	1.083	0.921	1.057	1.095	-0.13	-0.39	-0.08	-0.15	0.01	-0.29	0.12	-0.12	0.08	0.13
A0A8I6GC70	Four and a half LIM domains 2 OS=Rattus norvegicus OX=10116 GN=Fhl2 PE=4 SV=1	17	0.544	0.438	2.014	0.631	0.693	0.543	0.763	0.693	0.967	1.757	-0.88	-1.19	1.01	-0.67	-0.53	-0.88	-0.39	-0.53	-0.05	0.81
Q3T1J1	Eukaryotic translation initiation factor 5A-1 OS=Rattus norvegicus OX=10116 GN=Eif5a PE=1 SV=3	12	0.821	0.845	0.998	0.903	0.979	1.311	1.045	0.947	1.042	1.102	-0.28	-0.24	0	-0.15	-0.03	0.39	0.06	-0.08	0.06	0.14
A0A8I6ABQ2	BCL2 like 13 OS=Rattus norvegicus OX=10116 GN=Bcl2l13 PE=1 SV=1	13	0.95	1.027	0.975	1.007	1.034	1.073	1.022	1.026	1.007	0.993	-0.07	0.04	-0.04	0.01	0.05	0.1	0.03	0.04	0.01	-0.01
D4A133	H(+)-transporting two-sector ATPase OS=Rattus norvegicus OX=10116 GN=Atp6v1a PE=1 SV=2	18	1.045	1.183	1.069	1.023	1.007	1.043	1.047	0.961	1.267	1.008	0.06	0.24	0.1	0.03	0.01	0.06	0.07	-0.06	0.34	0.01
F1LXA0	NADH dehydrogenase [ubiquinone] 1 alpha subcomplex subunit 12 OS=Rattus norvegicus OX=10116 GN=Ndufa12 PE=3 SV=3	11	1.014	0.986	1.045	1.01	1.013	0.763	1.091	1.052	1.055	1.049	0.02	-0.02	0.06	0.01	0.02	-0.39	0.13	0.07	0.08	0.07
Q6P6G4	Phosphoglycerate mutase OS=Rattus norvegicus OX=10116 GN=Bpgm PE=1 SV=1	13	0.802	1.583	0.727	0.946	0.794	2.122	0.911	1.129	1.033	0.689	-0.32	0.66	-0.46	-0.08	-0.33	1.09	-0.13	0.17	0.05	-0.54
D3ZVM5	Heat shock protein family A (Hsp70) member 12B OS=Rattus norvegicus OX=10116 GN=Hspa12b PE=1 SV=3	20	0.916	0.815	1.026	0.902	1.036	0.795	1.091	1.029	1.092	1.123	-0.13	-0.3	0.04	-0.15	0.05	-0.33	0.13	0.04	0.13	0.17
A0A0G2JWX1	Proteasome (Prosome, macropain) 26S subunit, non-ATPase, 11 (Predicted), isoform CRA_b OS=Rattus norvegicus OX=10116 GN=Psmd11 PE=1 SV=1	21	0.929	1.026	0.965	0.959	0.997	0.972	1.017	0.998	1.047	1.027	-0.11	0.04	-0.05	-0.06	0	-0.04	0.02	0	0.07	0.04
P07340	Sodium/potassium-transporting ATPase subunit beta-1 OS=Rattus norvegicus OX=10116 GN=Atp1b1 PE=1 SV=1	12	0.827	0.786	1.192	0.96	1.029	0.723	1.044	0.966	1.004	1.159	-0.27	-0.35	0.25	-0.06	0.04	-0.47	0.06	-0.05	0.01	0.21
Q63798	Proteasome activator complex subunit 2 OS=Rattus norvegicus OX=10116 GN=Psme2 PE=2 SV=3	15	0.923	0.903	0.905	0.934	1.002	0.843	0.945	0.941	1.013	0.899	-0.12	-0.15	-0.14	-0.1	0	-0.25	-0.08	-0.09	0.02	-0.15
A0A8I5ZY90	Hydroxymethylglutaryl-CoA lyase, mitochondrial OS=Rattus norvegicus OX=10116 GN=Hmgcl PE=1 SV=1	10	0.89	0.608	1.035	1.019	1.158	0.714	1.049	0.883	0.989	1.042	-0.17	-0.72	0.05	0.03	0.21	-0.49	0.07	-0.18	-0.02	0.06
Q8VHS9	L-type calcium channel alpha2/delta subunit OS=Rattus norvegicus OX=10116 GN=Cacna2d1 PE=2 SV=1	20	1.087	1.189	0.924	1.043	1.052	0.962	0.979	1.068	0.969	0.942	0.12	0.25	-0.11	0.06	0.07	-0.06	-0.03	0.09	-0.04	-0.09
A0A8I5ZWY7	Eukaryotic translation elongation factor 1 delta OS=Rattus norvegicus OX=10116 GN=Eef1d PE=1 SV=1	14	0.907	0.997	0.923	0.962	1.002	1.081	1.005	0.999	1.012	1.004	-0.14	0	-0.12	-0.06	0	0.11	0.01	0	0.02	0.01
Q6AY30	Saccharopine dehydrogenase-like oxidoreductase OS=Rattus norvegicus OX=10116 GN=Sccpdh PE=1 SV=1	13	0.913	1.028	0.967	0.999	1.04	0.872	1.063	1.091	1.039	1.519	-0.13	0.04	-0.05	0	0.06	-0.2	0.09	0.13	0.06	0.6
Q63525	Nuclear migration protein nudC OS=Rattus norvegicus OX=10116 GN=Nudc PE=1 SV=1	18	0.963	1.09	0.94	1.011	1.072	1.139	0.999	1.011	1.015	0.977	-0.05	0.12	-0.09	0.02	0.1	0.19	0	0.02	0.02	-0.03
G3V7T3	4'-phosphopantetheine phosphatase OS=Rattus norvegicus OX=10116 GN=Pank4 PE=1 SV=1	21	1.123	0.876	1.037	1.007	1.064	0.757	1.067	1.007	1.012	1.017	0.17	-0.19	0.05	0.01	0.09	-0.4	0.09	0.01	0.02	0.02
F1LS86	isoleucine--tRNA ligase OS=Rattus norvegicus OX=10116 GN=Iars1 PE=1 SV=2	28	0.974	1.24	0.905	0.96	0.988	1.023	0.964	0.998	1.004	0.928	-0.04	0.31	-0.14	-0.06	-0.02	0.03	-0.05	0	0.01	-0.11
A0A0G2K6P4	High-mobility group (nonhistone chromosomal) protein 1-like 1 OS=Rattus norvegicus OX=10116 GN=Hmgb1l1 PE=3 SV=1	13	0.784	1.015	1.004	0.917	0.978	1.012	1.043	0.93	0.993	1.093	-0.35	0.02	0.01	-0.13	-0.03	0.02	0.06	-0.1	-0.01	0.13
A0A8J8Y1B9	Syntrophin, alpha 1 OS=Rattus norvegicus OX=10116 GN=Snta1 PE=1 SV=1	16	0.856	0.714	1.083	0.852	0.972	0.67	1.046	0.994	1.051	1.133	-0.22	-0.49	0.11	-0.23	-0.04	-0.58	0.06	-0.01	0.07	0.18
G3V8C4	Chloride intracellular channel protein OS=Rattus norvegicus OX=10116 GN=Clic4 PE=1 SV=1	13	0.892	0.857	0.99	0.958	1.051	0.936	1.055	0.996	1.071	1.066	-0.17	-0.22	-0.01	-0.06	0.07	-0.1	0.08	-0.01	0.1	0.09
A0A8I6AFR4	Thymopoietin OS=Rattus norvegicus OX=10116 GN=Tmpo PE=1 SV=1	14	0.97	1.147	1.084	1.22	1.218	0.988	1.208	1.112	1.217	1.276	-0.04	0.2	0.12	0.29	0.28	-0.02	0.27	0.15	0.28	0.35
A0A8I6GFU3	Supervillin OS=Rattus norvegicus OX=10116 GN=Svil PE=1 SV=1	26	0.954	1.206	0.932	0.994	0.967	1.269	0.966	1.119	1.038	0.947	-0.07	0.27	-0.1	-0.01	-0.05	0.34	-0.05	0.16	0.05	-0.08
A0A8I5ZUG1	Glycerol-3-phosphate dehydrogenase OS=Rattus norvegicus OX=10116 GN=Gpd2 PE=1 SV=1	18	0.94	1.263	0.902	0.985	1.05	2.213	1	1.204	1.011	1.038	-0.09	0.34	-0.15	-0.02	0.07	1.15	0	0.27	0.02	0.05
Q63598	Plastin-3 OS=Rattus norvegicus OX=10116 GN=Pls3 PE=1 SV=2	19	0.911	1.065	0.899	0.952	0.977	1.577	1.008	0.989	1.028	0.992	-0.13	0.09	-0.15	-0.07	-0.03	0.66	0.01	-0.02	0.04	-0.01
P62804	Histone H4 OS=Rattus norvegicus OX=10116 GN=H4c2 PE=1 SV=2	12	0.986	1.047	1.129	1.395	0.928	1.588	0.846	1.155	0.794	0.767	-0.02	0.07	0.17	0.48	-0.11	0.67	-0.24	0.21	-0.33	-0.38
A0A8I6A860	Insulin degrading enzyme OS=Rattus norvegicus OX=10116 GN=Ide PE=1 SV=1	22	1.049	1.21	0.97	1.068	1.059	1.226	1.099	1.075	1.108	0.973	0.07	0.28	-0.04	0.09	0.08	0.29	0.14	0.1	0.15	-0.04
A0A8I5ZL83	Muscular LMNA-interacting protein OS=Rattus norvegicus OX=10116 GN=Mlip PE=4 SV=1	13	0.92	0.802	0.887	0.897	0.999	0.758	0.904	0.929	0.908	0.892	-0.12	-0.32	-0.17	-0.16	0	-0.4	-0.15	-0.11	-0.14	-0.17
A0A0G2JVM2	MIA SH3 domain ER export factor 3 OS=Rattus norvegicus OX=10116 GN=Mia3 PE=1 SV=2	23	0.905	1.022	0.909	0.958	1.04	0.978	1.076	1.014	1.021	1.026	-0.14	0.03	-0.14	-0.06	0.06	-0.03	0.11	0.02	0.03	0.04
Q58FK9	Kynurenine--oxoglutarate transaminase 3 OS=Rattus norvegicus OX=10116 GN=Kyat3 PE=2 SV=1	13	0.882	0.645	1.059	1.052	1.153	0.675	1.103	0.94	1.031	1.073	-0.18	-0.63	0.08	0.07	0.21	-0.57	0.14	-0.09	0.04	0.1
A0A0G2K1C0	Actin-related protein 3 OS=Rattus norvegicus OX=10116 GN=Actr3 PE=1 SV=1	16	0.938	1.058	0.93	0.974	1.013	1.223	0.969	0.994	1.026	0.948	-0.09	0.08	-0.11	-0.04	0.02	0.29	-0.05	-0.01	0.04	-0.08
A0A8I6A7I8	Septin OS=Rattus norvegicus OX=10116 GN=Septin2 PE=1 SV=1	13	0.915	1.055	0.92	1.017	1.006	1.25	1.003	1.015	1.039	0.968	-0.13	0.08	-0.12	0.02	0.01	0.32	0	0.02	0.06	-0.05
Q62733	Lamina-associated polypeptide 2, isoform beta OS=Rattus norvegicus OX=10116 GN=Tmpo PE=1 SV=3	15	0.895	1.275	0.955	0.995	0.971	1.04	0.976	1.009	0.983	0.998	-0.16	0.35	-0.07	-0.01	-0.04	0.06	-0.04	0.01	-0.03	0
A0A8I6ALS6	AP2 associated kinase 1 OS=Rattus norvegicus OX=10116 GN=Aak1 PE=1 SV=1	16	0.915	1.05	0.887	0.963	0.999	1.066	0.993	1.018	0.977	0.945	-0.13	0.07	-0.17	-0.05	0	0.09	-0.01	0.03	-0.03	-0.08
P17220	Proteasome subunit alpha type-2 OS=Rattus norvegicus OX=10116 GN=Psma2 PE=1 SV=3	12	0.848	1.032	0.944	1.019	1.057	1.005	1.051	0.99	1.028	1.032	-0.24	0.05	-0.08	0.03	0.08	0.01	0.07	-0.01	0.04	0.05
Q5U2Z3	Nucleosome assembly protein 1-like 4 OS=Rattus norvegicus OX=10116 GN=Nap1l4 PE=1 SV=1	11	0.917	0.966	0.965	0.948	1.049	0.883	1.034	1.006	1.04	1.009	-0.13	-0.05	-0.05	-0.08	0.07	-0.18	0.05	0.01	0.06	0.01
P40329	Arginine--tRNA ligase, cytoplasmic OS=Rattus norvegicus OX=10116 GN=Rars1 PE=1 SV=2	18	0.991	1.091	0.986	1.009	1.051	1.116	1.068	1.111	1.071	1.096	-0.01	0.13	-0.02	0.01	0.07	0.16	0.1	0.15	0.1	0.13
Q5BK33	55 kDa erythrocyte membrane protein OS=Rattus norvegicus OX=10116 GN=LOC652956 PE=2 SV=1	13	0.758	1.82	0.819	1.134	0.866	1.726	1.022	1.098	1.118	0.728	-0.4	0.86	-0.29	0.18	-0.21	0.79	0.03	0.13	0.16	-0.46
G3V7G0	Dynein light intermediate chain OS=Rattus norvegicus OX=10116 GN=Dync1li1 PE=1 SV=1	18	0.952	1.014	0.932	0.95	1.028	0.915	1.015	1.209	1.026	1.368	-0.07	0.02	-0.1	-0.07	0.04	-0.13	0.02	0.27	0.04	0.45
A0JPJ7	Obg-like ATPase 1 OS=Rattus norvegicus OX=10116 GN=Ola1 PE=2 SV=1	18	0.845	0.817	1.007	0.869	1.014	0.829	1.036	0.976	1.039	1.084	-0.24	-0.29	0.01	-0.2	0.02	-0.27	0.05	-0.04	0.06	0.12
G3V9M6	Fibrillin 1 OS=Rattus norvegicus OX=10116 GN=Fbn1 PE=1 SV=1	29	0.777	1.008	1.088	0.91	0.857	1.662	0.942	1.057	1.01	1.041	-0.36	0.01	0.12	-0.14	-0.22	0.73	-0.09	0.08	0.01	0.06
A0A0G2JY66	Carboxylic ester hydrolase OS=Rattus norvegicus OX=10116 GN=Ces1d PE=1 SV=2	15	0.818	1.288	0.788	0.922	0.893	1.993	0.863	1.014	0.869	0.82	-0.29	0.37	-0.34	-0.12	-0.16	0.99	-0.21	0.02	-0.2	-0.29
A0A0G2JTI8	Aminopeptidase OS=Rattus norvegicus OX=10116 GN=Enpep PE=1 SV=2	21	0.887	1.01	1.002	0.972	1.017	1.168	1.074	0.926	1.007	0.99	-0.17	0.01	0	-0.04	0.02	0.22	0.1	-0.11	0.01	-0.01
G3V8U8	Branched-chain-amino-acid aminotransferase OS=Rattus norvegicus OX=10116 GN=Bcat2 PE=1 SV=1	12	0.907	0.863	1.04	1.016	0.983	0.908	1.016	1.007	1.018	1.08	-0.14	-0.21	0.06	0.02	-0.02	-0.14	0.02	0.01	0.03	0.11
A0A0G2JZ52	Heterogeneous nuclear ribonucleoprotein U OS=Rattus norvegicus OX=10116 GN=Hnrnpu PE=1 SV=1	22	0.814	0.924	1.01	0.87	0.955	0.941	1.051	1.028	1.096	1.136	-0.3	-0.11	0.01	-0.2	-0.07	-0.09	0.07	0.04	0.13	0.18
A0A8I6A4D8	GNAS complex locus OS=Rattus norvegicus OX=10116 GN=Gnas PE=1 SV=1	12	0.907	1.044	1.009	1.021	1.049	1.072	1.048	0.974	1.029	1.065	-0.14	0.06	0.01	0.03	0.07	0.1	0.07	-0.04	0.04	0.09
P16446	Phosphatidylinositol transfer protein alpha isoform OS=Rattus norvegicus OX=10116 GN=Pitpna PE=1 SV=2	13	0.894	1.12	0.963	1.001	1.014	1.137	1.048	1.028	1.025	1.022	-0.16	0.16	-0.05	0	0.02	0.19	0.07	0.04	0.04	0.03
P07323	Gamma-enolase OS=Rattus norvegicus OX=10116 GN=Eno2 PE=1 SV=2	11	0.955	1.141	0.972	1.123	1.04	1.293	1.036	1.008	0.847	0.868	-0.07	0.19	-0.04	0.17	0.06	0.37	0.05	0.01	-0.24	-0.2
F1LR92	Serpin family A member 3M OS=Rattus norvegicus OX=10116 GN=Serpina3m PE=1 SV=3	14	0.908	1.354	0.84	0.998	0.842	1.645	0.951	1.11	0.992	0.815	-0.14	0.44	-0.25	0	-0.25	0.72	-0.07	0.15	-0.01	-0.29
Q4G061	Eukaryotic translation initiation factor 3 subunit B OS=Rattus norvegicus OX=10116 GN=Eif3b PE=1 SV=1	18	0.859	0.966	0.951	0.923	0.95	1.419	1.014	1.017	1.037	1.037	-0.22	-0.05	-0.07	-0.11	-0.07	0.5	0.02	0.02	0.05	0.05
A0A0G2K6E8	Sperm associated antigen 9 OS=Rattus norvegicus OX=10116 GN=Spag9 PE=1 SV=1	22	1.259	1.138	1.093	1.049	1.049	0.942	1.006	1.009	1.002	0.98	0.33	0.19	0.13	0.07	0.07	-0.09	0.01	0.01	0	-0.03
A0A8I6AES7	NADH dehydrogenase [ubiquinone] iron-sulfur protein 7, mitochondrial OS=Rattus norvegicus OX=10116 GN=Ndufs7 PE=1 SV=1	8	1.025	0.801	1.031	1.013	1.079	0.574	1.121	1.033	1.033	1.078	0.04	-0.32	0.04	0.02	0.11	-0.8	0.16	0.05	0.05	0.11
A0A8I5ZQL5	Acyl-CoA dehydrogenase family, member 8 OS=Rattus norvegicus OX=10116 GN=Acad8 PE=1 SV=1	18	0.962	0.999	0.975	0.976	1.05	0.881	1.037	1.025	1.014	1.014	-0.06	0	-0.04	-0.03	0.07	-0.18	0.05	0.04	0.02	0.02
P30835	ATP-dependent 6-phosphofructokinase, liver type OS=Rattus norvegicus OX=10116 GN=Pfkl PE=1 SV=3	19	0.94	1.277	0.841	1.002	0.974	1.332	0.996	1.114	1.044	0.937	-0.09	0.35	-0.25	0	-0.04	0.41	-0.01	0.16	0.06	-0.09
A0A8I5ZDN9	Complement C5 OS=Rattus norvegicus OX=10116 GN=C5 PE=1 SV=1	24	0.883	1.196	0.804	0.928	0.92	1.299	0.963	1.041	0.991	0.795	-0.18	0.26	-0.32	-0.11	-0.12	0.38	-0.05	0.06	-0.01	-0.33
D4A8G5	Transforming growth factor, beta induced OS=Rattus norvegicus OX=10116 GN=Tgfbi PE=1 SV=3	14	0.965	1.208	0.928	0.97	0.982	1.118	0.967	1.041	0.976	0.952	-0.05	0.27	-0.11	-0.04	-0.03	0.16	-0.05	0.06	-0.03	-0.07
A0A8I6AHS3	Thioredoxin-like 1 OS=Rattus norvegicus OX=10116 GN=Txnl1 PE=1 SV=1	11	0.871	1.103	0.908	1.001	1.02	1.185	1.004	1.012	1.032	1.011	-0.2	0.14	-0.14	0	0.03	0.25	0.01	0.02	0.05	0.02
A0A0G2K654	H1.2 linker histone, cluster member OS=Rattus norvegicus OX=10116 GN=H1f2 PE=1 SV=1	15	1.276	1.169	1.173	1.275	1.018	0.946	0.816	1.008	0.816	0.772	0.35	0.23	0.23	0.35	0.03	-0.08	-0.29	0.01	-0.29	-0.37
A0A1Y0DEC9	Cytochrome c oxidase subunit 1 OS=Rattus exulans OX=34854 GN=COX1 PE=3 SV=1	7	0.428	0.417	0.731	0.629	0.911	0.36	0.697	0.589	0.726	0.66	-1.22	-1.26	-0.45	-0.67	-0.14	-1.47	-0.52	-0.76	-0.46	-0.6
A0A8I5ZZ79	Hypoxanthine phosphoribosyltransferase OS=Rattus norvegicus OX=10116 GN=Hprt1 PE=1 SV=1	12	0.92	1.053	1.04	0.992	0.974	1.037	1.046	0.978	0.988	1.067	-0.12	0.08	0.06	-0.01	-0.04	0.05	0.06	-0.03	-0.02	0.09
P07895	Superoxide dismutase [Mn], mitochondrial OS=Rattus norvegicus OX=10116 GN=Sod2 PE=1 SV=2	13	1.027	0.851	1.067	1.066	1.108	0.732	1.036	0.965	0.958	1.011	0.04	-0.23	0.09	0.09	0.15	-0.45	0.05	-0.05	-0.06	0.02
F1M3D3	Heterogeneous nuclear ribonucleoprotein M OS=Rattus norvegicus OX=10116 GN=Hnrnpm PE=1 SV=2	17	0.852	0.978	0.976	0.903	1.01	0.944	1.021	0.983	1.028	1.064	-0.23	-0.03	-0.03	-0.15	0.02	-0.08	0.03	-0.02	0.04	0.09
P84079	ADP-ribosylation factor 1 OS=Rattus norvegicus OX=10116 GN=Arf1 PE=1 SV=2	11	0.833	1.058	0.963	0.925	0.994	0.937	1.071	0.944	1.048	1.053	-0.26	0.08	-0.05	-0.11	-0.01	-0.09	0.1	-0.08	0.07	0.07
A0A0G2K2B5	Aspartate-beta-hydroxylase OS=Rattus norvegicus OX=10116 GN=Asph PE=1 SV=2	17	0.957	1.031	0.943	1.057	1.021	0.917	1.033	1.048	1.024	0.982	-0.06	0.04	-0.08	0.08	0.03	-0.12	0.05	0.07	0.03	-0.03
Q80U96	Exportin-1 OS=Rattus norvegicus OX=10116 GN=Xpo1 PE=1 SV=1	19	0.831	1.09	0.914	0.903	0.982	1.021	1.038	1.022	1.063	0.962	-0.27	0.12	-0.13	-0.15	-0.03	0.03	0.05	0.03	0.09	-0.06
A9CMB7	Aspartate--tRNA ligase, cytoplasmic OS=Rattus norvegicus OX=10116 GN=Dars1 PE=3 SV=1	17	1.001	1.112	1.022	1.091	1.047	0.963	1.149	1.091	1.111	1.039	0	0.15	0.03	0.13	0.07	-0.05	0.2	0.13	0.15	0.05
Q9JLZ1	Glutaredoxin-3 OS=Rattus norvegicus OX=10116 GN=Glrx3 PE=1 SV=2	14	0.966	1.093	0.917	1.031	0.996	1.087	1.018	1.041	0.982	0.977	-0.05	0.13	-0.13	0.04	-0.01	0.12	0.03	0.06	-0.03	-0.03
Q4G064	2-methoxy-6-polyprenyl-1,4-benzoquinol methylase, mitochondrial OS=Rattus norvegicus OX=10116 GN=Coq5 PE=2 SV=1	14	0.916	0.951	1.012	0.966	1.03	0.917	1.066	1.029	1.059	1.078	-0.13	-0.07	0.02	-0.05	0.04	-0.12	0.09	0.04	0.08	0.11
P04182	Ornithine aminotransferase, mitochondrial OS=Rattus norvegicus OX=10116 GN=Oat PE=1 SV=1	14	0.909	1.237	0.915	1.024	0.988	1.116	0.976	1.039	0.962	1.044	-0.14	0.31	-0.13	0.03	-0.02	0.16	-0.04	0.06	-0.06	0.06
G3V644	NADH dehydrogenase [ubiquinone] flavoprotein 3, mitochondrial OS=Rattus norvegicus OX=10116 GN=Ndufv3 PE=1 SV=1	13	0.865	0.779	0.964	0.918	1.051	1.05	1.026	1.021	0.971	1.048	-0.21	-0.36	-0.05	-0.12	0.07	0.07	0.04	0.03	-0.04	0.07
Q920F5	Malonyl-CoA decarboxylase, mitochondrial OS=Rattus norvegicus OX=10116 GN=Mlycd PE=1 SV=1	18	0.885	0.832	0.938	1.001	1.053	0.768	1.004	1.045	0.995	1.069	-0.18	-0.27	-0.09	0	0.07	-0.38	0.01	0.06	-0.01	0.1
P11240	Cytochrome c oxidase subunit 5A, mitochondrial OS=Rattus norvegicus OX=10116 GN=Cox5a PE=1 SV=1	10	0.879	0.729	0.824	0.961	1.107	0.648	1.26	0.993	1.153	1.054	-0.19	-0.46	-0.28	-0.06	0.15	-0.63	0.33	-0.01	0.21	0.08
Q5QD51	A-kinase anchor protein 12 OS=Rattus norvegicus OX=10116 GN=Akap12 PE=1 SV=1	20	0.705	1.163	0.834	0.863	0.961	1.415	0.952	0.993	0.91	0.974	-0.5	0.22	-0.26	-0.21	-0.06	0.5	-0.07	-0.01	-0.14	-0.04
A0A0G2JV31	X-prolyl aminopeptidase (Aminopeptidase P) 1, soluble, isoform CRA_a OS=Rattus norvegicus OX=10116 GN=Xpnpep1 PE=1 SV=1	18	0.913	1.237	0.857	0.972	0.974	1.449	0.925	0.983	0.949	0.93	-0.13	0.31	-0.22	-0.04	-0.04	0.53	-0.11	-0.02	-0.08	-0.1
P63245	Receptor of activated protein C kinase 1 OS=Rattus norvegicus OX=10116 GN=Rack1 PE=1 SV=3	14	0.937	0.997	0.998	0.979	0.991	0.916	1.008	1.003	1.006	1.034	-0.09	0	0	-0.03	-0.01	-0.13	0.01	0	0.01	0.05
B2GUV7	Eukaryotic translation initiation factor 5B OS=Rattus norvegicus OX=10116 GN=Eif5b PE=1 SV=1	20	0.947	0.963	0.965	0.999	1.056	0.989	0.988	1.067	1.021	0.975	-0.08	-0.05	-0.05	0	0.08	-0.02	-0.02	0.09	0.03	-0.04
D4A9G1	Ribosomal protein L3-like OS=Rattus norvegicus OX=10116 GN=Rpl3l PE=3 SV=2	16	0.782	0.709	1.136	0.961	1.025	0.732	1.066	1.023	1.048	1.233	-0.35	-0.5	0.18	-0.06	0.04	-0.45	0.09	0.03	0.07	0.3
P53987	Monocarboxylate transporter 1 OS=Rattus norvegicus OX=10116 GN=Slc16a1 PE=1 SV=1	13	0.777	0.69	0.996	0.841	0.999	0.699	1.075	0.98	1.091	1.057	-0.36	-0.54	-0.01	-0.25	0	-0.52	0.1	-0.03	0.13	0.08
Q9EQP5	Prolargin OS=Rattus norvegicus OX=10116 GN=Prelp PE=2 SV=1	16	0.869	1.739	0.765	0.931	0.815	2.049	0.812	1.011	0.838	0.787	-0.2	0.8	-0.39	-0.1	-0.29	1.04	-0.3	0.02	-0.25	-0.35
P10688	1-phosphatidylinositol 4,5-bisphosphate phosphodiesterase delta-1 OS=Rattus norvegicus OX=10116 GN=Plcd1 PE=1 SV=1	13	0.788	0.664	0.902	0.957	0.959	0.894	0.952	0.883	0.966	0.9	-0.34	-0.59	-0.15	-0.06	-0.06	-0.16	-0.07	-0.18	-0.05	-0.15
P47875	Cysteine and glycine-rich protein 1 OS=Rattus norvegicus OX=10116 GN=Csrp1 PE=1 SV=2	11	0.635	0.986	0.782	0.696	0.768	3.326	0.819	1.108	0.796	0.836	-0.65	-0.02	-0.35	-0.52	-0.38	1.73	-0.29	0.15	-0.33	-0.26
Q499R7	inorganic diphosphatase (Fragment) OS=Rattus norvegicus OX=10116 GN=Ppa1 PE=2 SV=1	12	0.926	0.854	0.984	1.022	1.083	0.957	1.107	0.962	1.084	1.041	-0.11	-0.23	-0.02	0.03	0.12	-0.06	0.15	-0.06	0.12	0.06
G3V6W6	Proteasome 26S subunit, ATPase 6 OS=Rattus norvegicus OX=10116 GN=Psmc6 PE=1 SV=1	13	0.885	1.044	0.936	0.945	1.008	0.962	1.024	1.006	1.026	0.99	-0.18	0.06	-0.1	-0.08	0.01	-0.06	0.03	0.01	0.04	-0.02
Q63413	Spliceosome RNA helicase Ddx39b OS=Rattus norvegicus OX=10116 GN=Ddx39b PE=2 SV=3	15	0.927	1.119	0.983	1.002	1.017	1.013	1.013	1.094	1.059	1.083	-0.11	0.16	-0.02	0	0.02	0.02	0.02	0.13	0.08	0.12
Q5U362	Annexin OS=Rattus norvegicus OX=10116 GN=Anxa4 PE=1 SV=1	13	1.091	1.232	1.112	1.139	1.137	1.331	0.831	0.843	0.905	0.899	0.13	0.3	0.15	0.19	0.18	0.41	-0.27	-0.25	-0.14	-0.15
G3V6H2	Pre-mRNA processing factor 8 OS=Rattus norvegicus OX=10116 GN=Prpf8 PE=1 SV=1	22	1.347	1.244	0.924	1.088	1.01	0.931	1.009	1.078	1.005	0.849	0.43	0.32	-0.11	0.12	0.01	-0.1	0.01	0.11	0.01	-0.24
P70645	Bleomycin hydrolase OS=Rattus norvegicus OX=10116 GN=Blmh PE=1 SV=1	14	0.829	0.979	0.882	0.942	1.023	1.175	0.979	1.005	0.991	0.889	-0.27	-0.03	-0.18	-0.09	0.03	0.23	-0.03	0.01	-0.01	-0.17
Q66HA8	Heat shock protein 105 kDa OS=Rattus norvegicus OX=10116 GN=Hsph1 PE=1 SV=1	17	0.875	1.14	0.957	0.986	0.971	1.221	1.029	1.014	1.034	1.063	-0.19	0.19	-0.06	-0.02	-0.04	0.29	0.04	0.02	0.05	0.09
P09527	Ras-related protein Rab-7a OS=Rattus norvegicus OX=10116 GN=Rab7a PE=1 SV=2	14	1.144	1.622	0.883	1.072	0.977	1.185	1.017	1.064	1.027	0.897	0.19	0.7	-0.18	0.1	-0.03	0.24	0.02	0.09	0.04	-0.16
P04906	Glutathione S-transferase P OS=Rattus norvegicus OX=10116 GN=Gstp1 PE=1 SV=2	11	0.899	0.943	1.011	1.018	1.035	1.045	1.03	0.935	0.963	1.037	-0.15	-0.08	0.02	0.03	0.05	0.06	0.04	-0.1	-0.06	0.05
P27952	40S ribosomal protein S2 OS=Rattus norvegicus OX=10116 GN=Rps2 PE=1 SV=1	14	0.651	0.774	1.119	0.893	0.986	0.866	1.04	0.954	1.048	1.211	-0.62	-0.37	0.16	-0.16	-0.02	-0.21	0.06	-0.07	0.07	0.28
Q7TQ16	Cytochrome b-c1 complex subunit 8 OS=Rattus norvegicus OX=10116 GN=Uqcrq PE=3 SV=1	8	0.666	0.549	0.971	0.888	1.048	0.52	0.985	0.868	0.937	0.934	-0.59	-0.86	-0.04	-0.17	0.07	-0.94	-0.02	-0.2	-0.09	-0.1
F1MAN8	Laminin subunit alpha 5 OS=Rattus norvegicus OX=10116 GN=Lama5 PE=1 SV=2	18	1.287	1.163	1.04	1.065	0.987	1.004	0.867	0.929	0.867	0.842	0.36	0.22	0.06	0.09	-0.02	0.01	-0.21	-0.11	-0.21	-0.25
D3ZN37	non-specific serine/threonine protein kinase OS=Rattus norvegicus OX=10116 GN=Rock1 PE=1 SV=3	24	0.872	1.008	0.929	0.928	0.974	1.153	0.992	0.993	0.996	0.95	-0.2	0.01	-0.11	-0.11	-0.04	0.21	-0.01	-0.01	-0.01	-0.07
A0A0G2JV12	Collagen type XV alpha 1 chain OS=Rattus norvegicus OX=10116 GN=Col15a1 PE=1 SV=1	12	1.112	1.216	0.966	1.052	1.051	1.023	0.896	0.984	0.905	0.846	0.15	0.28	-0.05	0.07	0.07	0.03	-0.16	-0.02	-0.14	-0.24
A0A8I6GDC1	Isocitrate dehydrogenase [NAD] subunit, mitochondrial OS=Rattus norvegicus OX=10116 GN=Idh3g PE=1 SV=1	11	0.81	0.77	1.041	0.908	0.958	0.832	1.082	0.984	1.036	1.175	-0.3	-0.38	0.06	-0.14	-0.06	-0.27	0.11	-0.02	0.05	0.23
A0A8I6AKB2	Profilin OS=Rattus norvegicus OX=10116 GN=Pfn1 PE=1 SV=1	11	0.932	0.898	0.994	0.992	1.063	0.997	1.076	0.935	1.028	1.017	-0.1	-0.16	-0.01	-0.01	0.09	0	0.11	-0.1	0.04	0.02
A0A8I6GI01	Tyrosine-protein phosphatase non-receptor type OS=Rattus norvegicus OX=10116 GN=Ptpn11 PE=1 SV=1	18	0.899	0.987	0.97	0.972	1.017	1.064	1.021	1.017	1.02	0.994	-0.15	-0.02	-0.04	-0.04	0.02	0.09	0.03	0.02	0.03	-0.01
D3ZHJ6	Calcium-transporting ATPase OS=Rattus norvegicus OX=10116 GN=Atp2a3 PE=1 SV=2	13	0.83	0.712	0.861	0.878	1.101	0.611	1.175	0.947	1.196	1.065	-0.27	-0.49	-0.22	-0.19	0.14	-0.71	0.23	-0.08	0.26	0.09
Q68FS2	COP9 signalosome complex subunit 4 OS=Rattus norvegicus OX=10116 GN=Cops4 PE=1 SV=1	17	0.926	1.071	0.984	0.997	1.042	0.996	1.04	1.028	1.011	1.039	-0.11	0.1	-0.02	0	0.06	-0.01	0.06	0.04	0.02	0.06
Q5RKI8	Mitochondrial potassium channel ATP-binding subunit OS=Rattus norvegicus OX=10116 GN=Abcb8 PE=2 SV=1	15	0.948	0.865	0.937	0.985	1.035	0.84	1.019	1.044	1.017	1.029	-0.08	-0.21	-0.09	-0.02	0.05	-0.25	0.03	0.06	0.02	0.04
B6DYP8	Glutathione S-transferase OS=Rattus norvegicus OX=10116 GN=Gsta1 PE=2 SV=1	14	0.886	1.607	0.859	0.966	0.954	1.898	0.862	1.036	0.889	0.875	-0.17	0.68	-0.22	-0.05	-0.07	0.92	-0.21	0.05	-0.17	-0.19
B2GUZ6	Reticulon 4 interacting protein 1 OS=Rattus norvegicus OX=10116 GN=Rtn4ip1 PE=1 SV=1	13	0.912	0.812	1.01	0.996	1.055	0.787	1.077	0.988	1.014	1.111	-0.13	-0.3	0.01	-0.01	0.08	-0.35	0.11	-0.02	0.02	0.15
A0A8I6AJH2	Protein-serine/threonine kinase OS=Rattus norvegicus OX=10116 GN=Pdk2 PE=1 SV=1	17	0.859	0.81	1.079	0.858	1.021	0.736	1.074	0.998	1.086	1.179	-0.22	-0.3	0.11	-0.22	0.03	-0.44	0.1	0	0.12	0.24
Q3MIE4	Synaptic vesicle membrane protein VAT-1 homolog OS=Rattus norvegicus OX=10116 GN=Vat1 PE=1 SV=1	12	0.988	1.469	0.851	1.016	0.974	1.434	0.904	1.017	0.93	0.865	-0.02	0.56	-0.23	0.02	-0.04	0.52	-0.15	0.02	-0.11	-0.21
D3ZDQ9	Sarcoglycan, alpha OS=Rattus norvegicus OX=10116 GN=Sgca PE=1 SV=1	14	0.993	0.944	0.986	0.984	1.064	0.758	0.975	0.993	0.95	0.986	-0.01	-0.08	-0.02	-0.02	0.09	-0.4	-0.04	-0.01	-0.07	-0.02
G3V6V1	Arginyl aminopeptidase OS=Rattus norvegicus OX=10116 GN=Rnpep PE=1 SV=1	17	0.917	0.927	0.939	1.018	1.095	0.965	1.07	1.118	1.071	1.086	-0.13	-0.11	-0.09	0.03	0.13	-0.05	0.1	0.16	0.1	0.12
Q99376	Transferrin receptor protein 1 OS=Rattus norvegicus OX=10116 GN=Tfrc PE=1 SV=2	21	1.053	0.885	0.976	0.997	1.025	0.866	0.949	1.018	0.988	1.008	0.08	-0.18	-0.03	0	0.04	-0.21	-0.07	0.03	-0.02	0.01
D3ZD05	KN motif and ankyrin repeat domain-containing protein 2 OS=Rattus norvegicus OX=10116 GN=Kank2 PE=1 SV=2	16	0.895	0.973	0.977	0.95	1.004	1.097	1.034	1.052	1.017	1.018	-0.16	-0.04	-0.03	-0.07	0.01	0.13	0.05	0.07	0.02	0.03
P68101	Eukaryotic translation initiation factor 2 subunit 1 OS=Rattus norvegicus OX=10116 GN=Eif2s1 PE=1 SV=2	15	0.94	1.142	0.935	0.981	1.015	1.235	1.021	1.048	1.031	0.974	-0.09	0.19	-0.1	-0.03	0.02	0.3	0.03	0.07	0.04	-0.04
D4A9W3	D-glutamate cyclase OS=Rattus norvegicus OX=10116 GN=Dglucy PE=1 SV=2	15	1.021	0.913	0.962	1.076	1.052	0.906	1.051	1.022	1.018	1.002	0.03	-0.13	-0.06	0.11	0.07	-0.14	0.07	0.03	0.03	0
A0A0H2UHG0	Tyrosine--tRNA ligase OS=Rattus norvegicus OX=10116 GN=Yars1 PE=3 SV=2	23	0.999	1.178	0.956	1.036	1.032	1.049	1.018	1.035	1.022	0.953	0	0.24	-0.06	0.05	0.05	0.07	0.03	0.05	0.03	-0.07
A0A8J8YNE4	MICOS complex subunit OS=Rattus norvegicus OX=10116 GN=Apool PE=1 SV=1	15	0.876	0.843	1.059	0.901	1.053	0.795	1.083	1.019	1.053	1.157	-0.19	-0.25	0.08	-0.15	0.07	-0.33	0.12	0.03	0.07	0.21
A0A0U1RS25	UPF1, RNA helicase and ATPase OS=Rattus norvegicus OX=10116 GN=Upf1 PE=1 SV=1	17	0.94	0.893	1.041	1.002	1.051	0.85	1.084	1.028	1.07	1.069	-0.09	-0.16	0.06	0	0.07	-0.24	0.12	0.04	0.1	0.1
Q63028	Alpha-adducin OS=Rattus norvegicus OX=10116 GN=Add1 PE=1 SV=2	14	0.846	1.417	0.822	1.023	0.878	1.441	0.979	1.168	1.011	0.899	-0.24	0.5	-0.28	0.03	-0.19	0.53	-0.03	0.22	0.02	-0.15
A0A8L2QW65	maleylacetoacetate isomerase OS=Rattus norvegicus OX=10116 GN=Gstz1 PE=1 SV=1	13	0.833	0.782	0.93	0.981	1.053	0.798	1.014	0.988	0.952	0.962	-0.26	-0.35	-0.11	-0.03	0.07	-0.32	0.02	-0.02	-0.07	-0.06
D3ZD89	N(alpha)-acetyltransferase 15, NatA auxiliary subunit OS=Rattus norvegicus OX=10116 GN=Naa15 PE=1 SV=2	17	0.891	0.979	0.985	0.958	1.025	0.947	1.043	1.043	1.061	1.086	-0.17	-0.03	-0.02	-0.06	0.04	-0.08	0.06	0.06	0.09	0.12
A0A8I5ZXA6	NADH dehydrogenase [ubiquinone] flavoprotein 2, mitochondrial OS=Rattus norvegicus OX=10116 GN=Ndufv2 PE=1 SV=1	11	0.92	0.921	0.869	0.955	1.018	0.726	1.061	1.032	1.037	0.993	-0.12	-0.12	-0.2	-0.07	0.03	-0.46	0.09	0.05	0.05	-0.01
A0A8I5ZQQ3	Pyruvate dehydrogenase phosphatase regulatory subunit OS=Rattus norvegicus OX=10116 GN=Pdpr PE=1 SV=1	18	0.922	0.927	0.979	0.989	1.014	0.803	1.073	1.015	1.04	1.061	-0.12	-0.11	-0.03	-0.02	0.02	-0.32	0.1	0.02	0.06	0.08
A0A8I5ZVK5	Plasminogen OS=Rattus norvegicus OX=10116 GN=Plg PE=1 SV=1	17	0.836	1.185	0.816	0.939	0.842	1.629	0.931	1.017	0.999	0.832	-0.26	0.25	-0.29	-0.09	-0.25	0.7	-0.1	0.02	0	-0.27
B1PRL5	Caveolae-associated protein 4 OS=Rattus norvegicus OX=10116 GN=Cavin4 PE=1 SV=1	14	0.948	0.842	1.033	0.991	1.038	0.673	1.098	0.982	1.038	1.113	-0.08	-0.25	0.05	-0.01	0.05	-0.57	0.14	-0.03	0.05	0.15
D3ZT90	Glutaryl-CoA dehydrogenase OS=Rattus norvegicus OX=10116 GN=Gcdh PE=3 SV=2	12	0.949	0.845	0.964	1.002	1.052	0.816	1.038	0.989	0.997	1.024	-0.08	-0.24	-0.05	0	0.07	-0.29	0.05	-0.02	0	0.03
A0A8I5Y1K4	Prostaglandin I2 synthase OS=Rattus norvegicus OX=10116 GN=Ptgis PE=3 SV=1	12	0.877	1.145	0.783	0.903	0.939	1.934	0.922	0.945	0.865	0.882	-0.19	0.2	-0.35	-0.15	-0.09	0.95	-0.12	-0.08	-0.21	-0.18
F1MAH5	Protein phosphatase 6, regulatory subunit 3 OS=Rattus norvegicus OX=10116 GN=Ppp6r3 PE=1 SV=3	18	0.912	1.168	0.966	0.977	1.143	0.982	1	0.979	1.033	1.016	-0.13	0.22	-0.05	-0.03	0.19	-0.03	0	-0.03	0.05	0.02
A0A8I6AP49	Aldehyde dehydrogenase 1 family, member A1 OS=Rattus norvegicus OX=10116 GN=Aldh1a1 PE=1 SV=1	15	0.883	1.332	0.838	1.044	0.936	1.367	0.945	0.968	0.909	0.882	-0.18	0.41	-0.26	0.06	-0.09	0.45	-0.08	-0.05	-0.14	-0.18
Q8VID1	Dehydrogenase/reductase SDR family member 4 OS=Rattus norvegicus OX=10116 GN=Dhrs4 PE=2 SV=2	11	0.879	0.829	1.038	0.995	1.028	1.012	1.063	1.026	1.011	1.065	-0.19	-0.27	0.05	-0.01	0.04	0.02	0.09	0.04	0.02	0.09
B5DFC3	Protein transport protein SEC23 OS=Rattus norvegicus OX=10116 GN=Sec23a PE=1 SV=1	15	0.951	1.273	0.892	0.993	1.165	1.225	1.023	1.018	1.026	0.936	-0.07	0.35	-0.16	-0.01	0.22	0.29	0.03	0.03	0.04	-0.1
D3ZDI7	Serine/threonine-protein phosphatase 2A 56 kDa regulatory subunit OS=Rattus norvegicus OX=10116 GN=Ppp2r5a PE=1 SV=1	12	0.983	0.929	1.028	1.009	1.085	0.869	1.046	1.023	1.057	1.054	-0.02	-0.11	0.04	0.01	0.12	-0.2	0.06	0.03	0.08	0.08
F1LSM0	Ubiquitin specific peptidase 24 OS=Rattus norvegicus OX=10116 GN=Usp24 PE=1 SV=3	19	0.954	1.059	0.991	1.038	1.039	0.982	1.074	1.087	1.105	1.096	-0.07	0.08	-0.01	0.05	0.06	-0.03	0.1	0.12	0.14	0.13
O88884	A-kinase anchor protein 1, mitochondrial OS=Rattus norvegicus OX=10116 GN=Akap1 PE=1 SV=1	15	1.08	1.094	0.97	0.98	1.009	1.02	0.938	0.968	0.955	0.946	0.11	0.13	-0.04	-0.03	0.01	0.03	-0.09	-0.05	-0.07	-0.08
P29975	Aquaporin-1 OS=Rattus norvegicus OX=10116 GN=Aqp1 PE=1 SV=4	9	0.775	1.031	0.954	1.036	0.978	1.136	0.953	1.007	0.943	0.823	-0.37	0.04	-0.07	0.05	-0.03	0.18	-0.07	0.01	-0.09	-0.28
D3ZL10	Collagen type VI alpha 6 chain OS=Rattus norvegicus OX=10116 GN=Col6a6 PE=1 SV=4	22	0.907	0.935	1.102	0.956	0.958	0.935	0.903	0.948	0.963	1.073	-0.14	-0.1	0.14	-0.07	-0.06	-0.1	-0.15	-0.08	-0.05	0.1
P10760	Adenosylhomocysteinase OS=Rattus norvegicus OX=10116 GN=Ahcy PE=1 SV=3	16	0.858	1.195	0.868	0.973	0.935	1.239	0.991	1.002	0.955	0.948	-0.22	0.26	-0.2	-0.04	-0.1	0.31	-0.01	0	-0.07	-0.08
Q6URK4	Heterogeneous nuclear ribonucleoprotein A3 OS=Rattus norvegicus OX=10116 GN=Hnrnpa3 PE=1 SV=1	12	0.851	0.947	0.968	0.925	0.974	1.036	1.005	0.954	1.02	1.096	-0.23	-0.08	-0.05	-0.11	-0.04	0.05	0.01	-0.07	0.03	0.13
A0A8I6G2N3	Disco-interacting protein 2 homolog C OS=Rattus norvegicus OX=10116 GN=Dip2c PE=1 SV=1	18	0.914	0.85	0.988	1.01	1.034	0.95	1.038	1.003	1.02	1.077	-0.13	-0.23	-0.02	0.01	0.05	-0.07	0.05	0	0.03	0.11
G3V6L9	peptidylprolyl isomerase OS=Rattus norvegicus OX=10116 GN=Fkbp3 PE=1 SV=1	13	0.966	0.985	1.042	1.057	1.032	0.835	1.033	1.007	0.978	1.045	-0.05	-0.02	0.06	0.08	0.05	-0.26	0.05	0.01	-0.03	0.06
Q31266	MHC class I RT1.Aw3 protein OS=Rattus norvegicus OX=10116 PE=2 SV=1	15	1.071	1.137	0.947	1.039	1.073	0.945	1.117	0.991	1.163	1.093	0.1	0.19	-0.08	0.06	0.1	-0.08	0.16	-0.01	0.22	0.13
P41350	Caveolin-1 OS=Rattus norvegicus OX=10116 GN=Cav1 PE=1 SV=3	12	0.917	1.075	1.052	1.122	1.081	0.834	1.052	0.99	0.981	1.033	-0.13	0.1	0.07	0.17	0.11	-0.26	0.07	-0.01	-0.03	0.05
Q62636	Ras-related protein Rap-1b OS=Rattus norvegicus OX=10116 GN=Rap1b PE=1 SV=2	11	0.818	0.97	0.892	0.929	1.034	1.046	0.924	0.932	0.93	0.887	-0.29	-0.04	-0.17	-0.11	0.05	0.06	-0.11	-0.1	-0.1	-0.17
F7EZE5	Transcription factor BTF3 OS=Rattus norvegicus OX=10116 GN=Btf3 PE=1 SV=1	12	0.801	0.828	0.953	0.865	0.987	1.045	0.943	0.932	0.955	0.99	-0.32	-0.27	-0.07	-0.21	-0.02	0.06	-0.08	-0.1	-0.07	-0.01
P68255	14-3-3 protein theta OS=Rattus norvegicus OX=10116 GN=Ywhaq PE=1 SV=1	14	0.829	0.964	1.019	0.952	1.087	1.259	1.069	0.952	1.037	1.056	-0.27	-0.05	0.03	-0.07	0.12	0.33	0.1	-0.07	0.05	0.08
G3V9D1	Phosphoinositide phospholipase C OS=Rattus norvegicus OX=10116 GN=Plcd1 PE=1 SV=1	13	1.008	1.129	0.918	1.108	1.053	1.164	1.041	1.119	1.038	0.94	0.01	0.17	-0.12	0.15	0.07	0.22	0.06	0.16	0.05	-0.09
A0A8I5ZN89	Glutaryl-CoA dehydrogenase OS=Rattus norvegicus OX=10116 GN=Gcdh PE=1 SV=1	11	0.825	0.938	0.844	0.964	1.01	0.949	1.007	0.851	0.898	0.99	-0.28	-0.09	-0.25	-0.05	0.01	-0.08	0.01	-0.23	-0.15	-0.01
A0A8I6G502	Cadherin 13 OS=Rattus norvegicus OX=10116 GN=Cdh13 PE=4 SV=1	13	0.829	1.052	1.056	0.966	0.957	1.173	0.968	0.965	0.95	0.981	-0.27	0.07	0.08	-0.05	-0.06	0.23	-0.05	-0.05	-0.07	-0.03
A0A8I5ZPF0	Haptoglobin OS=Rattus norvegicus OX=10116 GN=Hp PE=1 SV=1	15	0.786	1.499	0.748	0.907	0.969	1.662	1.049	1.12	1.079	0.715	-0.35	0.58	-0.42	-0.14	-0.05	0.73	0.07	0.16	0.11	-0.48
A0A0A0MY00	Acyl-CoA dehydrogenase, short/branched chain OS=Rattus norvegicus OX=10116 GN=Acadsb PE=1 SV=2	14	0.868	0.914	0.953	0.988	1.021	0.986	1.017	1.053	0.986	1.05	-0.2	-0.13	-0.07	-0.02	0.03	-0.02	0.02	0.07	-0.02	0.07
G3V918	Trifunctional purine biosynthetic protein adenosine-3 OS=Rattus norvegicus OX=10116 GN=Gart PE=1 SV=1	16	1.097	1.445	0.901	1.118	0.935	0.961	0.978	1.082	1.01	0.821	0.13	0.53	-0.15	0.16	-0.1	-0.06	-0.03	0.11	0.01	-0.29
Q6P3V9	60S ribosomal protein L4 OS=Rattus norvegicus OX=10116 GN=Rpl4 PE=1 SV=1	15	0.696	0.847	1.08	1.036	0.977	0.783	1.082	1.04	1.05	1.098	-0.52	-0.24	0.11	0.05	-0.03	-0.35	0.11	0.06	0.07	0.13
Q5RKG9	Eukaryotic translation initiation factor 4B OS=Rattus norvegicus OX=10116 GN=Eif4b PE=1 SV=1	14	0.903	0.999	0.942	1.002	1.071	0.974	1.005	1.056	1.018	1.103	-0.15	0	-0.09	0	0.1	-0.04	0.01	0.08	0.03	0.14
A0A8I5ZMF1	Carboxymethylenebutenolidase homolog OS=Rattus norvegicus OX=10116 GN=Cmbl PE=1 SV=1	11	0.894	0.579	1.061	0.991	1.09	0.618	1.062	0.945	1.038	1.122	-0.16	-0.79	0.09	-0.01	0.12	-0.69	0.09	-0.08	0.05	0.17
G3V8D5	6-phosphogluconolactonase OS=Rattus norvegicus OX=10116 GN=Pgls PE=1 SV=1	10	0.937	1.05	0.94	1.004	0.983	1.105	0.984	0.976	1.001	0.954	-0.09	0.07	-0.09	0.01	-0.02	0.14	-0.02	-0.03	0	-0.07
Q5XIM7	Lysine--tRNA ligase OS=Rattus norvegicus OX=10116 GN=Kars1 PE=1 SV=1	16	0.86	0.959	0.906	0.912	0.984	1.072	1.015	0.986	1.035	1.013	-0.22	-0.06	-0.14	-0.13	-0.02	0.1	0.02	-0.02	0.05	0.02
Q66HG9	Mitochondrial antiviral-signaling protein OS=Rattus norvegicus OX=10116 GN=Mavs PE=1 SV=1	11	1.016	0.871	1.041	1.007	1.074	0.795	1.025	0.948	0.994	1.018	0.02	-0.2	0.06	0.01	0.1	-0.33	0.04	-0.08	-0.01	0.03
P27321	Calpastatin OS=Rattus norvegicus OX=10116 GN=Cast PE=1 SV=3	14	0.936	0.998	1.008	1.062	1.15	1.097	0.962	0.969	0.959	0.942	-0.1	0	0.01	0.09	0.2	0.13	-0.06	-0.05	-0.06	-0.09
B4F789	Apolipoprotein B editing complex 2 (Predicted), isoform CRA_a OS=Rattus norvegicus OX=10116 GN=Apobec2 PE=1 SV=1	11	1.507	1.083	1.21	1.224	1.199	0.853	0.752	0.826	0.765	0.696	0.59	0.12	0.28	0.29	0.26	-0.23	-0.41	-0.28	-0.39	-0.52
A0A8I6ADH4	Palladin-like 1 OS=Rattus norvegicus OX=10116 GN=Palld PE=1 SV=1	19	1.045	1.035	1.01	1.033	1.021	1.093	0.997	1.08	0.971	0.923	0.06	0.05	0.01	0.05	0.03	0.13	0	0.11	-0.04	-0.11
Q9Z0J5	Thioredoxin reductase 2, mitochondrial OS=Rattus norvegicus OX=10116 GN=Txnrd2 PE=1 SV=3	13	0.954	0.889	0.988	1.028	1.05	0.819	1.019	1	0.994	1.051	-0.07	-0.17	-0.02	0.04	0.07	-0.29	0.03	0	-0.01	0.07
A0A8I6AE98	Nucleoside diphosphate kinase OS=Rattus norvegicus OX=10116 GN=Nme1 PE=1 SV=1	10	0.809	1.626	0.795	0.985	0.82	1.635	0.879	1.038	0.93	0.721	-0.31	0.7	-0.33	-0.02	-0.29	0.71	-0.19	0.05	-0.11	-0.47
A0A8I6A0I6	glutathione transferase OS=Rattus norvegicus OX=10116 GN=Gsta4 PE=1 SV=1	12	0.91	1.015	0.945	1.022	1.02	0.96	1.035	1.072	1.001	0.991	-0.14	0.02	-0.08	0.03	0.03	-0.06	0.05	0.1	0	-0.01
Q45QN0	Guanine nucleotide binding protein alpha inhibiting 2 OS=Rattus norvegicus OX=10116 GN=Gnai2 PE=2 SV=1	11	0.878	1.042	0.965	0.99	1.013	1.079	1.029	1.037	1.018	1.033	-0.19	0.06	-0.05	-0.01	0.02	0.11	0.04	0.05	0.03	0.05
Q6PCT9	Proteasome (Prosome, macropain) 26S subunit, non-ATPase, 6 OS=Rattus norvegicus OX=10116 GN=Psmd6 PE=1 SV=1	19	0.876	1.061	0.955	0.954	1.011	1.016	1.054	1.071	1.011	1.037	-0.19	0.09	-0.07	-0.07	0.02	0.02	0.08	0.1	0.02	0.05
A0A8L2R247	Protein kinase N3 OS=Rattus norvegicus OX=10116 GN=Pkn3 PE=1 SV=1	10	0.855	1.005	0.974	0.973	1.014	0.974	1.05	1.01	1.115	1.103	-0.23	0.01	-0.04	-0.04	0.02	-0.04	0.07	0.01	0.16	0.14
A0A0G2JXI9	Histone H2B OS=Rattus norvegicus OX=10116 GN=ENSRNOG00000068034 PE=3 SV=2	9	1.055	0.914	1.094	1.19	0.911	1.053	0.872	1.045	0.824	0.815	0.08	-0.13	0.13	0.25	-0.13	0.07	-0.2	0.06	-0.28	-0.29
Q6P747	Heterochromatin protein 1-binding protein 3 OS=Rattus norvegicus OX=10116 GN=Hp1bp3 PE=1 SV=1	19	0.76	1.01	0.96	0.919	1.035	0.915	1.054	1.131	1.063	1.072	-0.4	0.01	-0.06	-0.12	0.05	-0.13	0.08	0.18	0.09	0.1
P31211	Corticosteroid-binding globulin OS=Rattus norvegicus OX=10116 GN=Serpina6 PE=1 SV=2	14	0.758	1.451	0.704	0.992	0.852	1.502	1.091	1.037	1.1	0.823	-0.4	0.54	-0.51	-0.01	-0.23	0.59	0.13	0.05	0.14	-0.28
G3V843	Prothrombin OS=Rattus norvegicus OX=10116 GN=F2 PE=1 SV=1	15	0.94	1.191	0.919	1.006	0.931	1.376	1.002	1.048	1.009	0.925	-0.09	0.25	-0.12	0.01	-0.1	0.46	0	0.07	0.01	-0.11
A0A3S4FDI0	Cysteine and glycine rich protein 3 c-terminal HA-tagged OS=Rattus norvegicus OX=10116 GN=Csrp3 PE=4 SV=1	11	0.78	0.941	1.139	0.821	0.995	0.922	1.074	0.835	1.044	1.231	-0.36	-0.09	0.19	-0.28	-0.01	-0.12	0.1	-0.26	0.06	0.3
A0A0G2K1M8	Prolyl endopeptidase OS=Rattus norvegicus OX=10116 GN=Prep PE=1 SV=2	18	0.989	0.979	0.998	1.014	1.086	0.971	1.059	1.057	1.041	1.068	-0.02	-0.03	0	0.02	0.12	-0.04	0.08	0.08	0.06	0.1
B0K031	RCG30479, isoform CRA_b OS=Rattus norvegicus OX=10116 GN=Rpl7 PE=2 SV=1	18	0.817	1.214	0.956	0.967	0.942	0.861	1.01	0.998	1.005	0.982	-0.29	0.28	-0.07	-0.05	-0.09	-0.22	0.01	0	0.01	-0.03
P50475	Alanine--tRNA ligase, cytoplasmic OS=Rattus norvegicus OX=10116 GN=Aars1 PE=1 SV=3	17	0.904	1.169	0.93	1.028	1.001	1.201	1.008	1.018	1.022	0.962	-0.15	0.23	-0.1	0.04	0	0.26	0.01	0.03	0.03	-0.06
A0A8I6A8L1	Coiled-coil domain containing 51 OS=Rattus norvegicus OX=10116 GN=Ccdc51 PE=1 SV=1	15	1.044	0.884	1.013	1.02	1.06	0.852	1.007	1.016	1.026	1.062	0.06	-0.18	0.02	0.03	0.08	-0.23	0.01	0.02	0.04	0.09
P04041	Glutathione peroxidase 1 OS=Rattus norvegicus OX=10116 GN=Gpx1 PE=1 SV=4	12	0.889	0.991	0.947	0.946	0.939	1.251	1.034	0.982	1.089	0.989	-0.17	-0.01	-0.08	-0.08	-0.09	0.32	0.05	-0.03	0.12	-0.02
A0A8I6AS02	Protein kinase C and casein kinase substrate in neurons 3 OS=Rattus norvegicus OX=10116 GN=Pacsin3 PE=1 SV=1	11	1.027	1.773	0.939	0.978	0.947	1.165	0.958	0.935	0.95	0.882	0.04	0.83	-0.09	-0.03	-0.08	0.22	-0.06	-0.1	-0.07	-0.18
M0R7V3	MICOS complex subunit OS=Rattus norvegicus OX=10116 GN=Apoo PE=1 SV=2	8	0.893	0.74	1.009	0.96	1.057	0.597	1	0.982	1.03	1.017	-0.16	-0.44	0.01	-0.06	0.08	-0.74	0	-0.03	0.04	0.02
P36860	Ras-related protein Ral-B OS=Rattus norvegicus OX=10116 GN=Ralb PE=2 SV=1	9	0.958	1.234	0.969	1.036	1.027	1.195	0.98	0.939	0.941	0.924	-0.06	0.3	-0.05	0.05	0.04	0.26	-0.03	-0.09	-0.09	-0.11
Q75Q39	Mitochondrial import receptor subunit TOM70 OS=Rattus norvegicus OX=10116 GN=Tomm70 PE=1 SV=1	17	0.995	0.989	0.993	0.966	1.041	0.876	1.013	0.989	1.014	1.043	-0.01	-0.02	-0.01	-0.05	0.06	-0.19	0.02	-0.02	0.02	0.06
A0A0G2JZS2	Polyadenylate-binding protein OS=Rattus norvegicus OX=10116 GN=Pabpc1 PE=1 SV=2	14	0.904	1.123	0.915	0.971	1.005	1.448	1.02	1.109	1.027	0.976	-0.15	0.17	-0.13	-0.04	0.01	0.53	0.03	0.15	0.04	-0.03
D3ZLT1	NADH dehydrogenase [ubiquinone] 1 beta subcomplex subunit 7 OS=Rattus norvegicus OX=10116 GN=Ndufb7 PE=1 SV=1	8	1.06	0.997	0.991	1.028	1.015	0.857	1.063	1.042	1.029	1.002	0.08	0	-0.01	0.04	0.02	-0.22	0.09	0.06	0.04	0
O88321	26S proteasome non-ATPase regulatory subunit 4 OS=Rattus norvegicus OX=10116 GN=Psmd4 PE=1 SV=1	8	0.946	0.959	0.936	0.957	0.964	1.068	0.942	0.956	0.926	0.919	-0.08	-0.06	-0.1	-0.06	-0.05	0.1	-0.09	-0.06	-0.11	-0.12
D4A9D8	Oxysterol-binding protein OS=Rattus norvegicus OX=10116 GN=Osbp PE=1 SV=3	17	0.917	0.976	0.971	0.978	1.058	1.015	1.015	1.194	1.073	1.077	-0.13	-0.04	-0.04	-0.03	0.08	0.02	0.02	0.26	0.1	0.11
E9PT66	Splicing factor 3b, subunit 3 OS=Rattus norvegicus OX=10116 GN=Sf3b3 PE=1 SV=2	17	0.903	0.984	0.921	0.943	1.002	0.99	0.974	0.961	0.994	0.922	-0.15	-0.02	-0.12	-0.09	0	-0.01	-0.04	-0.06	-0.01	-0.12
A0A8I6A4A2	Vacuolar protein sorting 13 homolog A OS=Rattus norvegicus OX=10116 GN=Vps13a PE=1 SV=1	23	0.794	0.766	0.917	0.904	1.083	0.857	1.014	1.027	1.032	1.045	-0.33	-0.39	-0.12	-0.15	0.11	-0.22	0.02	0.04	0.05	0.06
P38718	Mitochondrial pyruvate carrier 2 OS=Rattus norvegicus OX=10116 GN=Mpc2 PE=2 SV=1	10	0.666	0.474	1.041	0.682	1	0.423	1.057	0.876	1.099	1.292	-0.59	-1.08	0.06	-0.55	0	-1.24	0.08	-0.19	0.14	0.37
Q5EB81	NADH-cytochrome b5 reductase 1 OS=Rattus norvegicus OX=10116 GN=Cyb5r1 PE=2 SV=1	13	0.854	0.75	0.953	0.932	1.045	0.766	1.016	0.936	0.965	0.977	-0.23	-0.41	-0.07	-0.1	0.06	-0.38	0.02	-0.1	-0.05	-0.03
Q3ZAV2	Y box binding protein 1 OS=Rattus norvegicus OX=10116 GN=Ybx1 PE=2 SV=1	9	0.888	0.764	0.881	0.881	1.066	0.751	1.107	1.019	1.074	1.19	-0.17	-0.39	-0.18	-0.18	0.09	-0.41	0.15	0.03	0.1	0.25
Q63768	Adapter molecule crk OS=Rattus norvegicus OX=10116 GN=Crk PE=1 SV=1	14	0.917	0.945	0.981	1.024	1.075	1.011	1.008	1.017	1.026	1.064	-0.13	-0.08	-0.03	0.03	0.1	0.02	0.01	0.02	0.04	0.09
G3V8Y8	Huntingtin interacting protein 1 OS=Rattus norvegicus OX=10116 GN=Hip1 PE=3 SV=2	16	1.114	1.174	0.886	1.009	0.923	1.144	0.907	0.998	0.958	0.866	0.16	0.23	-0.17	0.01	-0.12	0.19	-0.14	0	-0.06	-0.21
A0A8L2QU71	Adenine phosphoribosyltransferase OS=Rattus norvegicus OX=10116 GN=Aprt PE=1 SV=1	13	0.885	0.733	1.024	0.992	1.034	0.662	1.06	0.981	1.022	1.069	-0.18	-0.45	0.03	-0.01	0.05	-0.59	0.08	-0.03	0.03	0.1
A0A8I5ZUF9	Voltage-dependent anion-selective channel protein 1 OS=Rattus norvegicus OX=10116 GN=ENSRNOG00000069999 PE=3 SV=1	8	0.917	0.56	0.997	0.916	1.075	0.566	1.191	1.063	1.296	1.024	-0.12	-0.84	0	-0.13	0.1	-0.82	0.25	0.09	0.37	0.03
A0A8I5YBE8	WAS/WASL-interacting protein family member 3-like OS=Rattus norvegicus OX=10116 GN=Pura PE=1 SV=1	10	0.896	1.173	0.985	0.947	0.984	1.252	1.028	1.047	1.037	1.029	-0.16	0.23	-0.02	-0.08	-0.02	0.32	0.04	0.07	0.05	0.04
A0A0A1G491	NADH-ubiquinone oxidoreductase chain 2 OS=Rattus norvegicus OX=10116 GN=ND2 PE=3 SV=1	9	0.628	0.44	1.009	0.731	0.916	0.425	0.844	0.765	0.949	1.078	-0.67	-1.19	0.01	-0.45	-0.13	-1.23	-0.24	-0.39	-0.08	0.11
A0A8I6A678	Sorting nexin-2 OS=Rattus norvegicus OX=10116 GN=Snx2 PE=1 SV=1	16	0.955	1.191	0.918	1.025	1.008	1.091	0.985	1.018	0.995	0.964	-0.07	0.25	-0.12	0.04	0.01	0.13	-0.02	0.03	-0.01	-0.05
A0A8I6AHB0	5'-nucleotidase OS=Rattus norvegicus OX=10116 GN=Nt5c3a PE=1 SV=1	16	1.05	1.091	0.929	0.961	1.006	0.914	0.908	0.938	0.924	0.905	0.07	0.13	-0.11	-0.06	0.01	-0.13	-0.14	-0.09	-0.11	-0.14
Q5XI97	Alanyl-tRNA editing protein Aarsd1 OS=Rattus norvegicus OX=10116 GN=Aarsd1 PE=1 SV=1	12	0.924	1.173	0.888	1.006	0.981	0.924	0.962	0.969	0.942	0.921	-0.11	0.23	-0.17	0.01	-0.03	-0.11	-0.06	-0.04	-0.09	-0.12
B0BN63	Activator of Hsp90 ATPase activity 1 OS=Rattus norvegicus OX=10116 GN=Ahsa1 PE=1 SV=1	12	0.918	1	1.014	0.976	1.02	1.001	1.027	1.014	1.054	1.059	-0.12	0	0.02	-0.03	0.03	0	0.04	0.02	0.08	0.08
D3ZXP3	Histone H2A OS=Rattus norvegicus OX=10116 GN=H2ax PE=1 SV=1	10	1.283	1.068	1.144	1.334	0.911	1.323	0.829	1.12	0.78	0.737	0.36	0.1	0.19	0.42	-0.13	0.4	-0.27	0.16	-0.36	-0.44
D3ZAP9	Glycerol-3-phosphate dehydrogenase [NAD(+)] OS=Rattus norvegicus OX=10116 GN=Gpd1l PE=1 SV=1	16	0.935	0.937	1.007	0.98	1.01	1.094	1.013	0.974	0.982	1.079	-0.1	-0.09	0.01	-0.03	0.01	0.13	0.02	-0.04	-0.03	0.11
A0A8I6G5X8	Heterogeneous nuclear ribonucleoprotein H1 OS=Rattus norvegicus OX=10116 GN=Hnrnph1 PE=1 SV=1	11	0.989	1.15	0.952	1.005	0.965	1.048	0.971	1	1.007	0.938	-0.02	0.2	-0.07	0.01	-0.05	0.07	-0.04	0	0.01	-0.09
Q5EB55	Gbe1 protein (Fragment) OS=Rattus norvegicus OX=10116 GN=Gbe1 PE=2 SV=1	15	0.918	1.09	0.974	1.072	1.088	1.202	1.066	1.059	1.115	1.009	-0.12	0.12	-0.04	0.1	0.12	0.26	0.09	0.08	0.16	0.01
A0A8I5ZKR4	Methionine--tRNA ligase, cytoplasmic OS=Rattus norvegicus OX=10116 GN=Mars1 PE=1 SV=1	14	0.924	1.087	0.918	0.954	0.99	1.012	0.995	1.027	1.007	0.964	-0.11	0.12	-0.12	-0.07	-0.01	0.02	-0.01	0.04	0.01	-0.05
D3ZQD3	2-oxoglutarate dehydrogenase-like, mitochondrial OS=Rattus norvegicus OX=10116 GN=Ogdhl PE=1 SV=2	12	1.116	0.875	1.028	1.077	1.122	0.799	0.984	1.291	1.154	1.034	0.16	-0.19	0.04	0.11	0.17	-0.32	-0.02	0.37	0.21	0.05
D4A7U1	Zyxin OS=Rattus norvegicus OX=10116 GN=Zyx PE=1 SV=2	9	0.808	1.148	0.813	0.851	0.925	2.314	0.877	0.983	0.895	0.858	-0.31	0.2	-0.3	-0.23	-0.11	1.21	-0.19	-0.02	-0.16	-0.22
A0A8I6GM28	Microtubule-associated protein, RP/EB family, member 1 OS=Rattus norvegicus OX=10116 GN=Mapre1 PE=1 SV=1	11	1.017	1.251	0.949	1.018	1.031	1.115	0.955	1.01	0.971	0.933	0.02	0.32	-0.08	0.03	0.04	0.16	-0.07	0.01	-0.04	-0.1
H8Y6S5	DNA-directed RNA polymerase II subunit GRINL1A OS=Rattus norvegicus OX=10116 GN=Polr2m PE=2 SV=1	13	1.063	0.985	1.019	1.016	0.999	0.879	1.026	1.012	1.047	1.041	0.09	-0.02	0.03	0.02	0	-0.19	0.04	0.02	0.07	0.06
B0BN93	26S proteasome non-ATPase regulatory subunit 13 OS=Rattus norvegicus OX=10116 GN=Psmd13 PE=1 SV=1	13	0.909	1.096	0.945	0.978	1.021	0.985	1.043	1.002	1.051	1.017	-0.14	0.13	-0.08	-0.03	0.03	-0.02	0.06	0	0.07	0.02
P04905	Glutathione S-transferase Mu 1 OS=Rattus norvegicus OX=10116 GN=Gstm1 PE=1 SV=2	13	0.813	1.103	0.87	0.933	0.983	1.285	0.94	1.03	0.994	0.913	-0.3	0.14	-0.2	-0.1	-0.02	0.36	-0.09	0.04	-0.01	-0.13
Q5FVS1	Ferritin (Fragment) OS=Rattus norvegicus OX=10116 GN=Fth1 PE=2 SV=1	10	1.036	1.019	1.315	1.031	0.866	1.082	1.104	1.006	1.011	0.916	0.05	0.03	0.39	0.04	-0.21	0.11	0.14	0.01	0.02	-0.13
Q4G069	Regulator of microtubule dynamics protein 1 OS=Rattus norvegicus OX=10116 GN=Rmdn1 PE=2 SV=1	13	0.823	0.701	1.081	0.875	1.057	0.609	1.092	0.983	1.102	1.2	-0.28	-0.51	0.11	-0.19	0.08	-0.72	0.13	-0.02	0.14	0.26
P09811	Glycogen phosphorylase, liver form OS=Rattus norvegicus OX=10116 GN=Pygl PE=1 SV=5	18	0.868	1.172	0.876	0.897	0.912	1.712	0.983	1.098	1.075	0.997	-0.2	0.23	-0.19	-0.16	-0.13	0.78	-0.03	0.14	0.1	0
F7FLB2	phosphoglucomutase (alpha-D-glucose-1,6-bisphosphate-dependent) OS=Rattus norvegicus OX=10116 GN=Pgm2 PE=1 SV=3	19	0.866	1.073	0.93	0.995	0.996	1.136	0.987	1.005	0.993	0.957	-0.21	0.1	-0.1	-0.01	-0.01	0.18	-0.02	0.01	-0.01	-0.06
A0A8L2QJE6	Nitrilase family, member 2 OS=Rattus norvegicus OX=10116 GN=Nit2 PE=1 SV=1	15	0.95	0.861	0.999	1.055	1.074	0.918	1.052	1.048	1.014	1.053	-0.07	-0.22	0	0.08	0.1	-0.12	0.07	0.07	0.02	0.07
D3ZAN3	Alpha glucosidase 2 alpha neutral subunit (Predicted) OS=Rattus norvegicus OX=10116 GN=Ganab PE=1 SV=1	13	0.977	1.126	0.914	1.002	1.004	1.184	0.988	0.999	0.961	0.948	-0.03	0.17	-0.13	0	0.01	0.24	-0.02	0	-0.06	-0.08
A0A8I5ZKV9	Probable ATP-dependent RNA helicase DDX5 OS=Rattus norvegicus OX=10116 GN=Ddx5 PE=1 SV=1	18	0.877	1.065	0.961	0.924	1	1.031	1.009	1.05	1.031	1.054	-0.19	0.09	-0.06	-0.11	0	0.04	0.01	0.07	0.04	0.08
A0A140TAH9	Heterogeneous nuclear ribonucleoprotein C OS=Rattus norvegicus OX=10116 GN=Hnrnpc PE=1 SV=1	12	0.955	1.025	0.935	0.924	0.922	1.024	1.064	1.104	1.072	1.021	-0.07	0.04	-0.1	-0.11	-0.12	0.03	0.09	0.14	0.1	0.03
Q5BK81	Prostaglandin reductase 2 OS=Rattus norvegicus OX=10116 GN=Ptgr2 PE=2 SV=2	12	0.974	0.905	1.019	1.055	1.073	0.9	1.041	0.982	1.033	1.062	-0.04	-0.14	0.03	0.08	0.1	-0.15	0.06	-0.03	0.05	0.09
P46844	Biliverdin reductase A OS=Rattus norvegicus OX=10116 GN=Blvra PE=1 SV=1	13	0.822	0.987	0.921	0.907	1.034	1.067	1.008	1.012	1.003	0.977	-0.28	-0.02	-0.12	-0.14	0.05	0.09	0.01	0.02	0.01	-0.03
A0A0G2K1W9	Lactate dehydrogenase D OS=Rattus norvegicus OX=10116 GN=Ldhd PE=3 SV=2	12	0.979	0.794	1.045	1.041	1.1	0.858	1.148	0.959	1.007	1.16	-0.03	-0.33	0.06	0.06	0.14	-0.22	0.2	-0.06	0.01	0.21
Q6AYF2	LIM and cysteine-rich domains 1 OS=Rattus norvegicus OX=10116 GN=Lmcd1 PE=1 SV=1	15	1.271	1.113	1.126	1.022	1.007	1.339	0.992	0.97	1.003	1.079	0.35	0.15	0.17	0.03	0.01	0.42	-0.01	-0.04	0	0.11
A0A8I6B017	40S ribosomal protein S17 OS=Rattus norvegicus OX=10116 GN=Rps17 PE=3 SV=1	9	1.022	1.189	0.893	1.057	0.966	1.241	0.941	1.021	0.939	0.841	0.03	0.25	-0.16	0.08	-0.05	0.31	-0.09	0.03	-0.09	-0.25
Q5M7U6	Actin-related protein 2 OS=Rattus norvegicus OX=10116 GN=Actr2 PE=2 SV=1	10	1.064	1.117	0.975	1.052	1.057	1.115	1.043	1.03	1.065	0.966	0.09	0.16	-0.04	0.07	0.08	0.16	0.06	0.04	0.09	-0.05
Q07205	Eukaryotic translation initiation factor 5 OS=Rattus norvegicus OX=10116 GN=Eif5 PE=1 SV=1	13	0.841	1.004	0.975	0.924	1.012	1.033	1.021	1.043	1.025	1.059	-0.25	0.01	-0.04	-0.11	0.02	0.05	0.03	0.06	0.04	0.08
Q9WUS0	Adenylate kinase 4, mitochondrial OS=Rattus norvegicus OX=10116 GN=Ak4 PE=2 SV=1	11	0.957	0.734	1.025	1.006	1.103	0.678	0.984	0.994	1.009	1.037	-0.06	-0.45	0.04	0.01	0.14	-0.56	-0.02	-0.01	0.01	0.05
Q9JHZ4	GRIP1-associated protein 1 OS=Rattus norvegicus OX=10116 GN=Gripap1 PE=1 SV=1	16	1.051	1.198	0.959	1.057	1.042	1.157	1.066	1.074	1.063	1.023	0.07	0.26	-0.06	0.08	0.06	0.21	0.09	0.1	0.09	0.03
Q6AY09	Heterogeneous nuclear ribonucleoprotein H2 OS=Rattus norvegicus OX=10116 GN=Hnrnph2 PE=1 SV=1	10	1.015	1.09	0.867	1.01	1.033	0.93	0.933	1.006	0.99	0.936	0.02	0.12	-0.21	0.01	0.05	-0.1	-0.1	0.01	-0.01	-0.09
Q6DGG0	Peptidyl-prolyl cis-trans isomerase D OS=Rattus norvegicus OX=10116 GN=Ppid PE=1 SV=3	17	0.909	1.165	0.96	0.98	0.973	1.227	0.971	1.045	0.986	0.989	-0.14	0.22	-0.06	-0.03	-0.04	0.29	-0.04	0.06	-0.02	-0.02
P51635	Aldo-keto reductase family 1 member A1 OS=Rattus norvegicus OX=10116 GN=Akr1a1 PE=1 SV=2	14	1.008	1.343	0.866	1.031	0.895	1.21	0.944	0.999	0.967	0.858	0.01	0.43	-0.21	0.04	-0.16	0.27	-0.08	0	-0.05	-0.22
E2RUH2	Ribonuclease inhibitor OS=Rattus norvegicus OX=10116 GN=Rnh1 PE=1 SV=1	9	0.853	0.947	1.035	0.936	1.047	1.154	1.102	1.055	1.133	1.139	-0.23	-0.08	0.05	-0.1	0.07	0.21	0.14	0.08	0.18	0.19
P24090	Alpha-2-HS-glycoprotein OS=Rattus norvegicus OX=10116 GN=Ahsg PE=1 SV=2	7	0.491	0.717	0.801	0.681	0.581	4.397	0.789	1.02	0.915	0.874	-1.03	-0.48	-0.32	-0.56	-0.78	2.14	-0.34	0.03	-0.13	-0.19
A0A0G2K8P3	E3 ubiquitin-protein ligase OS=Rattus norvegicus OX=10116 GN=Nedd4 PE=1 SV=1	19	0.901	0.997	0.949	0.908	1.006	1.067	0.978	1.016	1.006	1.039	-0.15	0	-0.07	-0.14	0.01	0.09	-0.03	0.02	0.01	0.06
P19945	60S acidic ribosomal protein P0 OS=Rattus norvegicus OX=10116 GN=Rplp0 PE=1 SV=2	14	0.974	0.854	1.049	0.955	0.974	0.782	1.027	0.936	1.02	1.076	-0.04	-0.23	0.07	-0.07	-0.04	-0.35	0.04	-0.1	0.03	0.11
B0K040	Sh3bgr protein (Fragment) OS=Rattus norvegicus OX=10116 GN=Sh3bgr PE=2 SV=1	10	1.063	0.933	0.986	1.055	1.142	0.848	1.078	1.045	1.029	1.071	0.09	-0.1	-0.02	0.08	0.19	-0.24	0.11	0.06	0.04	0.1
D3ZH76	PPARGC1 and ESRR induced regulator, muscle 1 OS=Rattus norvegicus OX=10116 GN=Perm1 PE=1 SV=1	11	1.056	0.937	1.036	1.099	1.117	0.798	1.067	1.098	1.079	1.119	0.08	-0.09	0.05	0.14	0.16	-0.32	0.09	0.13	0.11	0.16
Q6P9V6	Proteasome subunit alpha type OS=Rattus norvegicus OX=10116 GN=Psma5 PE=1 SV=1	12	0.973	1.193	0.971	1.063	1.07	1.058	1.041	1.046	1.04	0.948	-0.04	0.25	-0.04	0.09	0.1	0.08	0.06	0.07	0.06	-0.08
Q9EQS0	Transaldolase OS=Rattus norvegicus OX=10116 GN=Taldo1 PE=1 SV=2	14	0.852	1.126	0.959	1.05	1.023	1.324	0.997	1.025	0.996	0.995	-0.23	0.17	-0.06	0.07	0.03	0.4	0	0.04	-0.01	-0.01
A0A8I5ZNK2	non-specific serine/threonine protein kinase OS=Rattus norvegicus OX=10116 GN=Oxsr1 PE=1 SV=1	12	0.869	1.108	0.857	0.983	0.951	1.064	0.946	1.024	1	0.879	-0.2	0.15	-0.22	-0.02	-0.07	0.09	-0.08	0.03	0	-0.19
A0A8I5ZN87	Kinesin light chain OS=Rattus norvegicus OX=10116 GN=Klc1 PE=1 SV=1	16	1.14	1.208	0.873	1.021	1.023	1.002	0.955	1.025	0.957	0.879	0.19	0.27	-0.2	0.03	0.03	0	-0.07	0.04	-0.06	-0.19
Q3KRE0	ATPase family AAA domain-containing protein 3 OS=Rattus norvegicus OX=10116 GN=Atad3 PE=1 SV=1	16	1.021	1.088	0.987	0.949	1.082	1.03	1.124	1.091	1.183	1.094	0.03	0.12	-0.02	-0.08	0.11	0.04	0.17	0.13	0.24	0.13
Q6P734	Plasma protease C1 inhibitor OS=Rattus norvegicus OX=10116 GN=Serping1 PE=2 SV=1	13	0.957	1.242	0.916	1.079	1.007	1.315	1.174	1.097	1.119	0.95	-0.06	0.31	-0.13	0.11	0.01	0.39	0.23	0.13	0.16	-0.07
A0A654ICE6	Gap junction protein OS=Rattus norvegicus OX=10116 GN=Gja1 PE=3 SV=1	9	0.966	0.93	1.035	0.97	1.006	0.737	1.046	0.98	1.057	1.13	-0.05	-0.1	0.05	-0.04	0.01	-0.44	0.06	-0.03	0.08	0.18
Q4KM74	Vesicle-trafficking protein SEC22b OS=Rattus norvegicus OX=10116 GN=Sec22b PE=1 SV=3	9	0.861	1.117	0.995	0.944	0.972	1.1	1.046	0.996	1.023	1.079	-0.22	0.16	-0.01	-0.08	-0.04	0.14	0.07	-0.01	0.03	0.11
A0A8I5ZKM2	glutathione transferase OS=Rattus norvegicus OX=10116 GN=Gstm4 PE=1 SV=1	12	0.858	0.981	0.918	0.989	0.948	1.113	0.978	1.048	0.901	0.919	-0.22	-0.03	-0.12	-0.02	-0.08	0.15	-0.03	0.07	-0.15	-0.12
A1L1J8	RAB5B, member RAS oncogene family OS=Rattus norvegicus OX=10116 GN=Rab5b PE=1 SV=1	8	0.874	1.01	0.853	0.932	0.973	1.249	0.921	0.998	0.959	0.884	-0.19	0.01	-0.23	-0.1	-0.04	0.32	-0.12	0	-0.06	-0.18
B1WBY5	DnaJ (Hsp40) homolog, subfamily C, member 11 OS=Rattus norvegicus OX=10116 GN=Dnajc11 PE=1 SV=1	12	0.858	0.664	1.032	0.886	1.038	0.656	1.089	1	1.087	1.171	-0.22	-0.59	0.05	-0.17	0.05	-0.61	0.12	0	0.12	0.23
A0A8I6GHY3	Peptidase, mitochondrial processing subunit alpha OS=Rattus norvegicus OX=10116 GN=Pmpca PE=1 SV=1	17	0.924	0.837	0.981	0.994	1.034	0.882	1.017	0.935	1.004	1.003	-0.11	-0.26	-0.03	-0.01	0.05	-0.18	0.02	-0.1	0.01	0
A0A0G2JSM3	PDZ and LIM domain 3 OS=Rattus norvegicus OX=10116 GN=Pdlim3 PE=1 SV=1	11	0.978	1.496	0.84	0.991	0.906	1.65	0.879	1.034	0.876	0.86	-0.03	0.58	-0.25	-0.01	-0.14	0.72	-0.19	0.05	-0.19	-0.22
Q5M7V8	Thyroid hormone receptor-associated protein 3 OS=Rattus norvegicus OX=10116 GN=Thrap3 PE=1 SV=1	19	0.934	1.105	0.947	0.981	1.008	0.923	0.997	1.028	1.065	1.05	-0.1	0.14	-0.08	-0.03	0.01	-0.12	0	0.04	0.09	0.07
Q5XIG4	OCIA domain-containing protein 1 OS=Rattus norvegicus OX=10116 GN=Ociad1 PE=1 SV=1	10	1.04	0.914	1.074	0.983	1.055	0.772	1.073	0.964	1.022	1.154	0.06	-0.13	0.1	-0.02	0.08	-0.37	0.1	-0.05	0.03	0.21
A0A8I6GKZ4	ELKS/RAB6-interacting/CAST family member 1 OS=Rattus norvegicus OX=10116 GN=Erc1 PE=1 SV=1	20	1.039	0.944	0.964	0.977	1.063	0.992	1.021	1.024	1.006	1.028	0.06	-0.08	-0.05	-0.03	0.09	-0.01	0.03	0.03	0.01	0.04
P24155	Thimet oligopeptidase OS=Rattus norvegicus OX=10116 GN=Thop1 PE=1 SV=4	15	1.039	1.14	0.997	1.106	1.086	1.018	1.094	1.064	1.087	1.043	0.06	0.19	0	0.14	0.12	0.03	0.13	0.09	0.12	0.06
G3V8G2	26S proteasome non-ATPase regulatory subunit 5 OS=Rattus norvegicus OX=10116 GN=Psmd5 PE=1 SV=1	12	1.595	1.46	1.209	1.286	1.225	1.2	1.042	1.246	1.074	1.03	0.67	0.55	0.27	0.36	0.29	0.26	0.06	0.32	0.1	0.04
Q4KM71	Splicing factor proline and glutamine rich OS=Rattus norvegicus OX=10116 GN=Sfpq PE=1 SV=1	15	0.846	1.041	0.935	0.973	1.046	1.259	1.087	1.271	1.078	1.239	-0.24	0.06	-0.1	-0.04	0.06	0.33	0.12	0.35	0.11	0.31
Q9EQX9	Ubiquitin-conjugating enzyme E2 N OS=Rattus norvegicus OX=10116 GN=Ube2n PE=1 SV=1	8	1.132	1.045	0.996	1.092	1.045	0.974	1.029	1.045	1.033	0.993	0.18	0.06	-0.01	0.13	0.06	-0.04	0.04	0.06	0.05	-0.01
A0A8L2Q089	NADPH--cytochrome P450 reductase OS=Rattus norvegicus OX=10116 GN=Por PE=1 SV=1	13	1.188	1.35	1.001	1.109	1.176	1.071	1.2	1.131	1.219	1.091	0.25	0.43	0	0.15	0.23	0.1	0.26	0.18	0.29	0.13
A0A8J8YIF6	60S ribosomal protein L7a OS=Rattus norvegicus OX=10116 GN=Rpl7a PE=3 SV=1	13	0.809	0.986	0.991	1.001	0.992	0.914	0.995	1.011	0.972	1.004	-0.31	-0.02	-0.01	0	-0.01	-0.13	-0.01	0.02	-0.04	0.01
Q4QQV4	Histidine--tRNA ligase, cytoplasmic OS=Rattus norvegicus OX=10116 GN=Hars1 PE=2 SV=1	18	0.935	1.209	0.949	1.055	1.097	1.049	1.01	1.031	1.018	1	-0.1	0.27	-0.08	0.08	0.13	0.07	0.01	0.04	0.03	0
A0A8I6A522	RAB2A, member RAS oncogene family OS=Rattus norvegicus OX=10116 GN=Rab2a PE=1 SV=1	10	0.95	1.449	0.911	0.989	0.927	1.116	0.979	0.994	1.006	0.955	-0.07	0.53	-0.13	-0.02	-0.11	0.16	-0.03	-0.01	0.01	-0.07
A0A8I6B663	ATP-dependent 6-phosphofructokinase OS=Rattus norvegicus OX=10116 GN=Pfkp PE=1 SV=1	14	0.753	1.544	0.827	0.921	0.912	1.423	0.914	1.009	0.908	0.927	-0.41	0.63	-0.27	-0.12	-0.13	0.51	-0.13	0.01	-0.14	-0.11
A0A8I6A1T4	Eukaryotic translation initiation factor 4, gamma 2 OS=Rattus norvegicus OX=10116 GN=Eif4g2 PE=1 SV=1	17	0.907	1.013	0.99	0.95	1.048	0.9	1.018	0.982	1.043	1.077	-0.14	0.02	-0.01	-0.07	0.07	-0.15	0.03	-0.03	0.06	0.11
A0A0G2JYA4	Serine/threonine-protein phosphatase OS=Rattus norvegicus OX=10116 GN=LOC100362453 PE=3 SV=1	11	0.901	0.9	0.995	0.972	1.041	0.855	1.024	0.975	1.015	1.09	-0.15	-0.15	-0.01	-0.04	0.06	-0.23	0.03	-0.04	0.02	0.12
P68182	cAMP-dependent protein kinase catalytic subunit beta OS=Rattus norvegicus OX=10116 GN=Prkacb PE=1 SV=2	14	0.628	0.797	0.897	0.774	0.912	0.946	0.977	0.931	0.996	1.003	-0.67	-0.33	-0.16	-0.37	-0.13	-0.08	-0.03	-0.1	-0.01	0
Q4KM62	Palmdelphin OS=Rattus norvegicus OX=10116 GN=Palmd PE=1 SV=1	13	1.022	0.707	1.062	0.862	1.046	0.809	1.096	0.897	1.071	1.12	0.03	-0.5	0.09	-0.21	0.06	-0.31	0.13	-0.16	0.1	0.16
Q5U4E6	Golgin subfamily A member 4 OS=Rattus norvegicus OX=10116 GN=Golga4 PE=1 SV=2	19	1.052	1.041	0.99	1.055	1.077	0.99	1.001	1.051	1.088	0.97	0.07	0.06	-0.01	0.08	0.11	-0.01	0	0.07	0.12	-0.04
A0A8I6A7A7	Nebulin-related anchoring protein OS=Rattus norvegicus OX=10116 GN=Nrap PE=4 SV=1	20	0.98	0.832	1.02	0.939	1.14	1.045	0.943	0.809	1.202	1.22	-0.03	-0.27	0.03	-0.09	0.19	0.06	-0.08	-0.31	0.27	0.29
A0A8I5ZLD0	Eukaryotic translation initiation factor 3 subunit L OS=Rattus norvegicus OX=10116 GN=Eif3l PE=1 SV=1	16	0.979	1.127	0.938	1.006	0.995	0.971	0.978	1.041	1.013	0.952	-0.03	0.17	-0.09	0.01	-0.01	-0.04	-0.03	0.06	0.02	-0.07
A0A8I6G4I5	G-rich RNA sequence binding factor 1 OS=Rattus norvegicus OX=10116 GN=Grsf1 PE=1 SV=1	12	1.109	0.766	0.953	1.051	1.203	0.817	0.926	1.068	1.062	1.266	0.15	-0.39	-0.07	0.07	0.27	-0.29	-0.11	0.1	0.09	0.34
A0A8L2PZQ3	ATP binding cassette subfamily F member 1 OS=Rattus norvegicus OX=10116 GN=Abcf1 PE=1 SV=1	17	0.924	0.9	1.065	0.978	1.074	0.905	1.165	1.045	1.115	1.22	-0.11	-0.15	0.09	-0.03	0.1	-0.14	0.22	0.06	0.16	0.29
O89049	Thioredoxin reductase 1, cytoplasmic OS=Rattus norvegicus OX=10116 GN=Txnrd1 PE=1 SV=5	11	0.91	1.041	0.941	1.034	1.038	1.087	0.986	0.973	0.966	0.944	-0.14	0.06	-0.09	0.05	0.05	0.12	-0.02	-0.04	-0.05	-0.08
Q63223	Rat hemoglobin beta-chain (Fragment) OS=Rattus norvegicus OX=10116 PE=2 SV=1	6	1.475	2.319	0.836	1.187	0.792	0.923	0.925	1.176	0.912	0.55	0.56	1.21	-0.26	0.25	-0.34	-0.12	-0.11	0.23	-0.13	-0.86
A7LAC4	E1 ubiquitin-activating enzyme OS=Rattus norvegicus OX=10116 PE=2 SV=2	11	1.072	1.011	1.225	1.172	1.063	0.981	1.159	1.467	1.447	1.372	0.1	0.02	0.29	0.23	0.09	-0.03	0.21	0.55	0.53	0.46
A0A0G2K0W9	Proteasome subunit alpha type OS=Rattus norvegicus OX=10116 GN=Psma7 PE=3 SV=2	12	0.929	1.156	0.895	1.007	0.992	1.073	0.981	1.003	1.007	0.953	-0.11	0.21	-0.16	0.01	-0.01	0.1	-0.03	0	0.01	-0.07
A0A0G2JV24	Thrombospondin 1 OS=Rattus norvegicus OX=10116 GN=Thbs1 PE=1 SV=2	13	0.694	1.868	0.671	0.87	0.76	2.888	0.878	1.008	0.903	0.653	-0.53	0.9	-0.58	-0.2	-0.4	1.53	-0.19	0.01	-0.15	-0.61
A0A8L2QIW0	60S ribosomal protein L6 OS=Rattus norvegicus OX=10116 GN=Rpl6 PE=1 SV=1	13	0.823	0.946	1.03	1.04	0.992	0.91	1.028	1.031	1.003	1.017	-0.28	-0.08	0.04	0.06	-0.01	-0.14	0.04	0.04	0	0.02
M0RC65	Cofilin 2 OS=Rattus norvegicus OX=10116 GN=Cfl2 PE=1 SV=1	13	0.899	0.908	1.033	0.976	1.037	1.109	1.02	0.972	0.993	1.045	-0.15	-0.14	0.05	-0.03	0.05	0.15	0.03	-0.04	-0.01	0.06
A0A8I6AHY5	Epiplakin 1 OS=Rattus norvegicus OX=10116 GN=Eppk1 PE=1 SV=1	15	0.984	1.24	0.938	1.074	1.009	1.297	0.985	1.041	1.03	0.991	-0.02	0.31	-0.09	0.1	0.01	0.38	-0.02	0.06	0.04	-0.01
A0A8I6A5S9	Acidic nuclear phosphoprotein 32 family member A OS=Rattus norvegicus OX=10116 GN=Anp32a PE=1 SV=1	13	0.818	0.957	0.968	0.903	0.977	1.088	1.016	0.971	1.034	1.051	-0.29	-0.06	-0.05	-0.15	-0.03	0.12	0.02	-0.04	0.05	0.07
A0A8I6GJJ3	Signal transducer and activator of transcription OS=Rattus norvegicus OX=10116 GN=Stat3 PE=1 SV=1	15	0.916	1.035	0.947	0.97	1.008	0.984	1.042	0.931	1.059	1.005	-0.13	0.05	-0.08	-0.04	0.01	-0.02	0.06	-0.1	0.08	0.01
G3V8R5	Hormone-sensitive lipase OS=Rattus norvegicus OX=10116 GN=Lipe PE=1 SV=1	15	0.873	1.228	0.844	1.036	1.054	1.399	0.991	1.471	0.986	0.988	-0.2	0.3	-0.24	0.05	0.08	0.48	-0.01	0.56	-0.02	-0.02
D4A228	Myomesin 3 OS=Rattus norvegicus OX=10116 GN=Myom3 PE=4 SV=3	13	0.824	0.653	1.068	1.035	1.076	0.544	1.165	0.989	1.022	1.03	-0.28	-0.62	0.1	0.05	0.11	-0.88	0.22	-0.02	0.03	0.04
Q4KM73	UMP-CMP kinase OS=Rattus norvegicus OX=10116 GN=Cmpk1 PE=1 SV=2	11	0.935	1.135	0.909	1.009	0.992	1.217	1.013	1.079	0.993	0.958	-0.1	0.18	-0.14	0.01	-0.01	0.28	0.02	0.11	-0.01	-0.06
P97532	3-mercaptopyruvate sulfurtransferase OS=Rattus norvegicus OX=10116 GN=Mpst PE=1 SV=3	12	0.88	1.046	0.921	1.026	0.98	1.138	1.023	1.038	0.986	0.948	-0.18	0.07	-0.12	0.04	-0.03	0.19	0.03	0.05	-0.02	-0.08
A0A8I6ATF2	PPFIA binding protein 1 OS=Rattus norvegicus OX=10116 GN=Ppfibp1 PE=1 SV=1	16	1.019	1.141	0.956	0.989	1.038	0.954	1.032	1.108	1.071	0.989	0.03	0.19	-0.07	-0.02	0.05	-0.07	0.04	0.15	0.1	-0.02
A0A8I5ZWK4	Glyceraldehyde 3-phosphate dehydrogenase catalytic domain-containing protein OS=Rattus norvegicus OX=10116 GN=ENSRNOG00000068856 PE=1 SV=1	10	0.895	1.044	0.876	0.925	0.99	0.982	0.99	0.993	0.982	0.916	-0.16	0.06	-0.19	-0.11	-0.01	-0.03	-0.01	-0.01	-0.03	-0.13
P45592	Cofilin-1 OS=Rattus norvegicus OX=10116 GN=Cfl1 PE=1 SV=3	12	0.678	0.825	0.827	0.758	0.84	1.512	0.899	0.968	0.92	1.092	-0.56	-0.28	-0.27	-0.4	-0.25	0.6	-0.15	-0.05	-0.12	0.13
D4A4K6	Nebulin-related anchoring protein OS=Rattus norvegicus OX=10116 GN=Nrap PE=1 SV=2	20	1.053	1.06	1.007	0.932	1.02	0.9	1.002	1.018	1.106	1.058	0.07	0.08	0.01	-0.1	0.03	-0.15	0	0.03	0.15	0.08
B2GV54	Neutral cholesterol ester hydrolase 1 OS=Rattus norvegicus OX=10116 GN=Nceh1 PE=1 SV=1	12	0.957	0.977	0.927	0.928	0.992	0.812	0.996	0.954	1.007	1.01	-0.06	-0.03	-0.11	-0.11	-0.01	-0.3	-0.01	-0.07	0.01	0.01
A0A8I5ZX94	Metaxin 2 OS=Rattus norvegicus OX=10116 GN=Mtx2 PE=1 SV=1	9	0.884	0.695	1.03	0.938	1.052	0.63	1.022	0.981	1.071	1.116	-0.18	-0.53	0.04	-0.09	0.07	-0.67	0.03	-0.03	0.1	0.16
A0A8I6A287	L-2-hydroxyglutarate dehydrogenase OS=Rattus norvegicus OX=10116 GN=L2hgdh PE=1 SV=1	11	0.915	0.965	0.992	1.012	1.055	0.999	1.044	1.033	1.012	1.049	-0.13	-0.05	-0.01	0.02	0.08	0	0.06	0.05	0.02	0.07
G3V6G7	polyribonucleotide nucleotidyltransferase OS=Rattus norvegicus OX=10116 GN=Pnpt1 PE=1 SV=1	16	1.027	0.811	1.058	1.053	1.074	0.791	1.08	1.008	1.069	1.079	0.04	-0.3	0.08	0.07	0.1	-0.34	0.11	0.01	0.1	0.11
A0A8I6AEH8	Protein disulfide-isomerase OS=Rattus norvegicus OX=10116 GN=Pdia4 PE=1 SV=1	15	0.887	1.199	0.862	0.956	0.957	1.535	0.946	1.042	0.979	0.966	-0.17	0.26	-0.21	-0.06	-0.06	0.62	-0.08	0.06	-0.03	-0.05
A0A8I6AQI7	Serpin family F member 2 OS=Rattus norvegicus OX=10116 GN=Serpinf2 PE=1 SV=1	12	0.788	1.287	0.754	0.933	0.821	1.769	0.912	1.006	0.967	0.73	-0.34	0.36	-0.41	-0.1	-0.28	0.82	-0.13	0.01	-0.05	-0.45
A0A8L2QV13	ATP synthase membrane subunit k OS=Rattus norvegicus OX=10116 GN=LOC103693330 PE=4 SV=1	5	0.823	0.615	1.012	0.806	0.927	0.48	1.087	0.865	0.99	1.286	-0.28	-0.7	0.02	-0.31	-0.11	-1.06	0.12	-0.21	-0.01	0.36
M0R7B4	H1.3 linker histone, cluster member OS=Rattus norvegicus OX=10116 GN=H4f3 PE=1 SV=2	12	1.102	0.804	1.276	1.315	1.137	0.818	0.877	0.946	0.887	0.919	0.14	-0.31	0.35	0.4	0.18	-0.29	-0.19	-0.08	-0.17	-0.12
A0A0G2JU66	Nuclear protein localization protein 4 homolog OS=Rattus norvegicus OX=10116 GN=Nploc4 PE=1 SV=1	13	0.965	0.96	1.002	0.976	1.058	0.859	1.043	0.975	1.038	1.039	-0.05	-0.06	0	-0.03	0.08	-0.22	0.06	-0.04	0.05	0.06
D3ZM60	Protein phosphatase 1, regulatory subunit 3A OS=Rattus norvegicus OX=10116 GN=Ppp1r3a PE=1 SV=2	18	0.859	0.948	0.832	0.832	0.968	0.751	1.127	1.337	1.16	1.42	-0.22	-0.08	-0.27	-0.26	-0.05	-0.41	0.17	0.42	0.21	0.51
F7FF51	Serine/threonine-protein phosphatase 2A activator OS=Rattus norvegicus OX=10116 GN=Ptpa PE=1 SV=1	12	0.841	1.2	0.888	0.963	0.963	1.305	1.009	1.04	1.027	0.925	-0.25	0.26	-0.17	-0.05	-0.05	0.38	0.01	0.06	0.04	-0.11
F7ETS0	Acyl-CoA thioesterase 9 OS=Rattus norvegicus OX=10116 GN=Acot9 PE=1 SV=1	14	0.805	0.836	0.971	0.909	1.005	0.849	1.034	0.971	1.08	1.107	-0.31	-0.26	-0.04	-0.14	0.01	-0.24	0.05	-0.04	0.11	0.15
A9UMV9	NADH dehydrogenase [ubiquinone] 1 alpha subcomplex subunit 7 OS=Rattus norvegicus OX=10116 GN=Ndufa7 PE=1 SV=1	11	0.913	0.733	1.1	0.952	1.013	0.587	1.027	0.945	0.981	1.097	-0.13	-0.45	0.14	-0.07	0.02	-0.77	0.04	-0.08	-0.03	0.13
A0A8I5ZMR7	Vacuolar protein sorting 13 homolog C OS=Rattus norvegicus OX=10116 GN=Vps13c PE=1 SV=1	20	1.008	1.018	1.009	1.045	1.033	1	1.029	1.094	1.055	0.92	0.01	0.03	0.01	0.06	0.05	0	0.04	0.13	0.08	-0.12
D4A3E2	Aminopeptidase-like 1 OS=Rattus norvegicus OX=10116 GN=Npepl1 PE=3 SV=3	10	0.863	0.922	0.911	0.969	1.099	0.802	0.955	0.958	0.95	0.945	-0.21	-0.12	-0.13	-0.05	0.14	-0.32	-0.07	-0.06	-0.07	-0.08
B2RYW3	NADH dehydrogenase [ubiquinone] 1 beta subcomplex subunit 9 OS=Rattus norvegicus OX=10116 GN=Ndufb9 PE=1 SV=1	9	1.076	0.855	1.177	1.027	1.018	0.832	1.078	1.026	1.032	1.162	0.11	-0.23	0.23	0.04	0.03	-0.27	0.11	0.04	0.05	0.22
P63322	Ras-related protein Ral-A OS=Rattus norvegicus OX=10116 GN=Rala PE=1 SV=1	9	1.168	0.996	1.026	1.057	1.035	0.877	0.981	0.917	0.985	1.023	0.22	-0.01	0.04	0.08	0.05	-0.19	-0.03	-0.12	-0.02	0.03
Q9Z269	Vesicle-associated membrane protein-associated protein B OS=Rattus norvegicus OX=10116 GN=Vapb PE=1 SV=3	10	1.059	0.984	1.027	1.025	1.057	0.857	0.995	0.927	0.948	0.975	0.08	-0.02	0.04	0.04	0.08	-0.22	-0.01	-0.11	-0.08	-0.04
A0A8I6A263	Aminoacyl tRNA synthetase complex-interacting multifunctional protein 1 OS=Rattus norvegicus OX=10116 GN=Aimp1 PE=1 SV=1	13	1	1.051	0.956	0.965	1.033	0.969	0.997	1.085	1.037	0.979	0	0.07	-0.07	-0.05	0.05	-0.05	0	0.12	0.05	-0.03
P13264	Glutaminase kidney isoform, mitochondrial OS=Rattus norvegicus OX=10116 GN=Gls PE=1 SV=2	13	0.831	1.014	0.945	0.997	1.021	1.066	1.011	0.992	0.983	1.046	-0.27	0.02	-0.08	0	0.03	0.09	0.02	-0.01	-0.02	0.06
A0A0G2K5F1	LRP16 protein OS=Rattus norvegicus OX=10116 GN=Macrod1 PE=1 SV=1	13	0.986	1.126	1.118	1.181	0.862	1	0.915	1.076	0.95	0.987	-0.02	0.17	0.16	0.24	-0.21	0	-0.13	0.11	-0.07	-0.02
A0A0G2K2T1	Taxilin beta OS=Rattus norvegicus OX=10116 GN=Txlnb PE=1 SV=2	12	0.897	0.892	1.054	0.919	1.049	0.903	1.091	1.017	1.083	1.157	-0.16	-0.17	0.08	-0.12	0.07	-0.15	0.13	0.02	0.12	0.21
P97571	Calpain-1 catalytic subunit OS=Rattus norvegicus OX=10116 GN=Capn1 PE=1 SV=1	17	0.918	1.248	0.847	0.945	0.901	1.308	0.972	1.067	1.03	0.863	-0.12	0.32	-0.24	-0.08	-0.15	0.39	-0.04	0.09	0.04	-0.21
D4A3V2	NADH dehydrogenase [ubiquinone] 1 alpha subcomplex subunit 6 OS=Rattus norvegicus OX=10116 GN=Ndufa6 PE=1 SV=1	8	0.983	0.652	1.091	0.969	1.052	0.605	1.107	0.95	1.009	1.112	-0.03	-0.62	0.13	-0.05	0.07	-0.73	0.15	-0.07	0.01	0.15
Q99ND8	protein-serine/threonine phosphatase OS=Rattus norvegicus OX=10116 GN=Ppm1b PE=2 SV=1	11	1.05	1.154	0.989	1.038	1.061	1.12	1.091	1.121	1.109	0.978	0.07	0.21	-0.02	0.05	0.09	0.16	0.13	0.16	0.15	-0.03
A0A8I5ZK51	hydroxymethylbilane synthase OS=Rattus norvegicus OX=10116 GN=Hmbs PE=1 SV=1	11	0.943	1.102	0.925	1.079	1.069	1.151	1.007	1.065	1.004	0.917	-0.08	0.14	-0.11	0.11	0.1	0.2	0.01	0.09	0.01	-0.13
A0A0H2UHE5	protein-serine/threonine phosphatase OS=Rattus norvegicus OX=10116 GN=Ppm1a PE=1 SV=1	12	0.956	1.065	0.919	1.005	0.952	1.019	0.994	0.984	0.999	0.975	-0.07	0.09	-0.12	0.01	-0.07	0.03	-0.01	-0.02	0	-0.04
Q794E4	Heterogeneous nuclear ribonucleoprotein F OS=Rattus norvegicus OX=10116 GN=Hnrnpf PE=1 SV=3	10	0.964	1.753	1.015	1.009	1.132	1.027	0.967	1.014	1.078	1.052	-0.05	0.81	0.02	0.01	0.18	0.04	-0.05	0.02	0.11	0.07
Q569B3	Igh-6 protein OS=Rattus norvegicus OX=10116 GN=Igh-6 PE=2 SV=1	14	0.859	1.683	0.695	1.101	0.806	1.931	0.904	1.157	0.942	0.711	-0.22	0.75	-0.52	0.14	-0.31	0.95	-0.15	0.21	-0.09	-0.49
P50503	Hsc70-interacting protein OS=Rattus norvegicus OX=10116 GN=St13 PE=1 SV=1	13	0.803	1.046	0.947	0.925	1.003	1.086	1.036	1.013	1.051	1.195	-0.32	0.07	-0.08	-0.11	0	0.12	0.05	0.02	0.07	0.26
F1LM55	Cell cycle and apoptosis regulator 2 OS=Rattus norvegicus OX=10116 GN=Ccar2 PE=1 SV=1	15	0.906	0.959	0.993	1.043	1.068	0.949	1.123	1.171	1.111	1.067	-0.14	-0.06	-0.01	0.06	0.1	-0.08	0.17	0.23	0.15	0.09
B0BNJ9	RCG44002, isoform CRA_a OS=Rattus norvegicus OX=10116 GN=Tmem14c PE=1 SV=1	5	0.543	0.488	0.79	0.713	0.993	0.471	0.869	0.704	0.836	0.856	-0.88	-1.04	-0.34	-0.49	-0.01	-1.09	-0.2	-0.51	-0.26	-0.22
Q5PQZ9	NADH dehydrogenase [ubiquinone] 1 subunit C2 OS=Rattus norvegicus OX=10116 GN=Ndufc2 PE=1 SV=1	12	0.861	0.776	0.967	0.94	0.999	0.593	1.012	0.961	0.984	0.962	-0.22	-0.37	-0.05	-0.09	0	-0.75	0.02	-0.06	-0.02	-0.06
A0A8I6ANU2	Pentatricopeptide repeat domain 3 OS=Rattus norvegicus OX=10116 GN=Ptcd3 PE=1 SV=1	16	0.913	0.838	0.939	0.994	1.065	0.796	1.037	1.005	1.03	1.013	-0.13	-0.25	-0.09	-0.01	0.09	-0.33	0.05	0.01	0.04	0.02
Q0R3X4	GIMAP4 OS=Rattus norvegicus OX=10116 GN=Gimap4 PE=1 SV=1	11	0.987	0.694	1.037	1.028	1.176	0.665	1.069	0.894	1.086	1.066	-0.02	-0.53	0.05	0.04	0.23	-0.59	0.1	-0.16	0.12	0.09
A0A8I6ANG4	Protein argonaute-2 OS=Rattus norvegicus OX=10116 GN=Ago2 PE=1 SV=1	18	0.946	0.85	1.051	0.97	1.046	0.873	1.069	0.99	1.028	1.026	-0.08	-0.23	0.07	-0.04	0.06	-0.2	0.1	-0.01	0.04	0.04
G3V879	5-demethoxyubiquinone hydroxylase, mitochondrial OS=Rattus norvegicus OX=10116 GN=Coq7 PE=1 SV=5	8	0.958	1.002	0.952	1.03	1.051	0.797	0.959	1.005	0.967	0.925	-0.06	0	-0.07	0.04	0.07	-0.33	-0.06	0.01	-0.05	-0.11
B0BN52	Mitochondrial carrier 2 OS=Rattus norvegicus OX=10116 GN=Mtch2 PE=2 SV=1	11	0.7	0.556	1.204	0.857	0.939	0.671	1.018	0.946	1.108	1.35	-0.52	-0.85	0.27	-0.22	-0.09	-0.58	0.03	-0.08	0.15	0.43
Q64303	Serine/threonine-protein kinase PAK 2 OS=Rattus norvegicus OX=10116 GN=Pak2 PE=1 SV=1	13	0.924	1.276	0.892	1.003	0.99	1.228	0.984	1.066	1.013	0.931	-0.11	0.35	-0.16	0	-0.01	0.3	-0.02	0.09	0.02	-0.1
P20761	Ig gamma-2B chain C region OS=Rattus norvegicus OX=10116 GN=Igh-1a PE=1 SV=1	7	0.991	1.548	0.698	0.997	0.884	1.901	0.925	1.223	0.924	1.039	-0.01	0.63	-0.52	0	-0.18	0.93	-0.11	0.29	-0.11	0.06
Q5HZV9	Protein phosphatase 1 regulatory subunit 7 OS=Rattus norvegicus OX=10116 GN=Ppp1r7 PE=1 SV=1	11	0.879	1.053	1.033	0.987	1.027	1.082	1.043	0.983	1.058	1.163	-0.19	0.07	0.05	-0.02	0.04	0.11	0.06	-0.03	0.08	0.22
A0A8I6AMG2	Biglycan OS=Rattus norvegicus OX=10116 GN=Bgn PE=1 SV=1	12	0.846	1.361	0.757	0.889	0.836	2.349	0.843	0.991	0.864	0.805	-0.24	0.44	-0.4	-0.17	-0.26	1.23	-0.25	-0.01	-0.21	-0.31
G3V818	Parvin, alpha OS=Rattus norvegicus OX=10116 GN=Parva PE=1 SV=1	10	0.81	1.13	0.877	0.875	0.903	1.702	0.924	0.95	0.926	0.986	-0.3	0.18	-0.19	-0.19	-0.15	0.77	-0.11	-0.07	-0.11	-0.02
A0A0G2K8T0	ceramidase OS=Rattus norvegicus OX=10116 GN=Asah1 PE=1 SV=1	14	0.891	1.052	0.931	0.994	1.053	0.853	0.971	0.953	0.952	0.965	-0.17	0.07	-0.1	-0.01	0.07	-0.23	-0.04	-0.07	-0.07	-0.05
P62142	Serine/threonine-protein phosphatase PP1-beta catalytic subunit OS=Rattus norvegicus OX=10116 GN=Ppp1cb PE=1 SV=3	12	0.943	1.296	1.058	1.022	1.038	1.024	1.073	1.027	1.038	1.106	-0.08	0.37	0.08	0.03	0.05	0.03	0.1	0.04	0.05	0.14
B3GNI6	Septin-11 OS=Rattus norvegicus OX=10116 GN=Septin11 PE=1 SV=1	11	0.928	1.076	0.949	1.075	1.057	1.178	1.004	1.005	1.02	0.975	-0.11	0.11	-0.08	0.1	0.08	0.24	0.01	0.01	0.03	-0.04
A0A0G2KB42	Clusterin OS=Rattus norvegicus OX=10116 GN=Clu PE=1 SV=2	10	0.818	1.368	0.792	0.889	0.877	2.443	0.933	1.165	0.961	0.946	-0.29	0.45	-0.34	-0.17	-0.19	1.29	-0.1	0.22	-0.06	-0.08
A0A5H1ZRV3	Tubulin polymerization promoting protein OS=Rattus norvegicus OX=10116 GN=Tppp PE=1 SV=2	9	0.942	1.177	0.946	1.025	1.011	0.897	1.002	1.017	0.977	0.965	-0.09	0.23	-0.08	0.04	0.02	-0.16	0	0.02	-0.03	-0.05
B2RYS2	Cytochrome b-c1 complex subunit 7 OS=Rattus norvegicus OX=10116 GN=Uqcrb PE=1 SV=1	12	1.046	0.819	1.065	1.05	1.064	0.591	1.12	1.023	1.016	1.069	0.07	-0.29	0.09	0.07	0.09	-0.76	0.16	0.03	0.02	0.1
Q5PQV3	Sodium/potassium-transporting ATPase subunit alpha OS=Rattus norvegicus OX=10116 GN=Atp1a4 PE=2 SV=1	11	0.966	0.989	0.964	1.013	0.972	0.892	1.064	1.07	1.014	1.009	-0.05	-0.02	-0.05	0.02	-0.04	-0.17	0.09	0.1	0.02	0.01
P01836	Ig kappa chain C region, A allele OS=Rattus norvegicus OX=10116 PE=1 SV=1	7	1.125	1.615	0.688	0.927	0.942	1.543	0.91	1.102	1.005	0.774	0.17	0.69	-0.54	-0.11	-0.09	0.63	-0.14	0.14	0.01	-0.37
P97541	Heat shock protein beta-6 OS=Rattus norvegicus OX=10116 GN=Hspb6 PE=1 SV=1	8	0.961	0.677	0.938	0.895	1.099	0.617	1.045	0.926	1.052	1.084	-0.06	-0.56	-0.09	-0.16	0.14	-0.7	0.06	-0.11	0.07	0.12
Q6P7Q2	Glypican 1 OS=Rattus norvegicus OX=10116 GN=Gpc1 PE=2 SV=1	10	1.024	0.868	0.964	1.001	1.11	0.801	1.041	1.012	1.023	1.034	0.03	-0.2	-0.05	0	0.15	-0.32	0.06	0.02	0.03	0.05
D4AE96	Importin 7 OS=Rattus norvegicus OX=10116 GN=Ipo7 PE=1 SV=1	14	1.097	0.845	1.049	1.047	1.071	0.736	1.015	0.983	1.02	0.995	0.13	-0.24	0.07	0.07	0.1	-0.44	0.02	-0.02	0.03	-0.01
M0R8B6	Tubulin beta chain OS=Rattus norvegicus OX=10116 GN=Tubb1 PE=1 SV=1	11	0.825	0.866	0.803	0.957	0.995	0.96	0.992	0.944	0.982	0.721	-0.28	-0.21	-0.32	-0.06	-0.01	-0.06	-0.01	-0.08	-0.03	-0.47
A0A8I6A660	Extended synaptotagmin 2 OS=Rattus norvegicus OX=10116 GN=Esyt2 PE=1 SV=1	13	0.938	1.231	0.839	0.95	0.925	1.355	0.939	1.15	0.96	0.846	-0.09	0.3	-0.25	-0.07	-0.11	0.44	-0.09	0.2	-0.06	-0.24
A0A8I6ALC1	Heterogeneous nuclear ribonucleoprotein A1 OS=Rattus norvegicus OX=10116 GN=Hnrnpa1 PE=1 SV=1	11	0.826	0.883	1.072	0.976	0.999	1.01	1.031	0.901	0.994	1.192	-0.28	-0.18	0.1	-0.03	0	0.01	0.04	-0.15	-0.01	0.25
Q9ESH1	26S proteasome non-ATPase regulatory subunit 4 OS=Rattus norvegicus OX=10116 GN=Psmd4 PE=1 SV=1	8	1.083	1.175	1.006	0.996	1.024	1.122	0.969	1.051	1.035	1.039	0.12	0.23	0.01	-0.01	0.03	0.17	-0.05	0.07	0.05	0.06
Q99J82	Integrin-linked protein kinase OS=Rattus norvegicus OX=10116 GN=Ilk PE=2 SV=1	14	0.798	0.945	0.971	0.892	0.995	1.326	1.041	1.011	1.024	1.089	-0.33	-0.08	-0.04	-0.16	-0.01	0.41	0.06	0.02	0.03	0.12
O35509	Ras-related protein Rab-11B OS=Rattus norvegicus OX=10116 GN=Rab11b PE=1 SV=4	11	1.019	1.117	0.973	1.038	1.024	0.943	1.011	0.946	1.006	1	0.03	0.16	-0.04	0.05	0.03	-0.08	0.02	-0.08	0.01	0
D4AB03	Family with sequence similarity 120A OS=Rattus norvegicus OX=10116 GN=Fam120a PE=1 SV=3	15	0.954	1.087	0.929	0.997	0.979	1.19	0.988	1.07	1.01	0.984	-0.07	0.12	-0.11	0	-0.03	0.25	-0.02	0.1	0.02	-0.02
Q6P9U8	Eukaryotic translation initiation factor 3 subunit H OS=Rattus norvegicus OX=10116 GN=Eif3h PE=1 SV=1	14	0.967	1.056	0.937	1.095	1.12	0.994	1.085	1.161	1.003	1.001	-0.05	0.08	-0.09	0.13	0.16	-0.01	0.12	0.22	0	0
F2Z3T7	Isochorismatase domain containing 1 OS=Rattus norvegicus OX=10116 GN=Isoc1 PE=1 SV=1	10	0.877	0.941	0.928	0.964	1.03	0.95	1.015	0.994	0.979	0.959	-0.19	-0.09	-0.11	-0.05	0.04	-0.07	0.02	-0.01	-0.03	-0.06
A0A0G2K6U1	Vesicle-fusing ATPase OS=Rattus norvegicus OX=10116 GN=Nsf PE=1 SV=2	16	0.868	1.161	0.902	0.955	1.033	1.173	1.033	1.047	1.036	0.937	-0.2	0.22	-0.15	-0.07	0.05	0.23	0.05	0.07	0.05	-0.09
F1M8K0	Dystroglycan 1 OS=Rattus norvegicus OX=10116 GN=Dag1 PE=1 SV=1	15	1.046	1.001	1.105	1.011	1.038	0.883	0.965	1.03	0.987	1.04	0.07	0	0.14	0.02	0.05	-0.18	-0.05	0.04	-0.02	0.06
Q9QVC8	Peptidyl-prolyl cis-trans isomerase FKBP4 OS=Rattus norvegicus OX=10116 GN=Fkbp4 PE=1 SV=3	12	0.872	1.182	0.951	0.983	0.974	1.082	0.989	1.049	0.987	1.009	-0.2	0.24	-0.07	-0.03	-0.04	0.11	-0.02	0.07	-0.02	0.01
A0A0G2K2V6	Keratin 10 OS=Rattus norvegicus OX=10116 GN=Krt10 PE=1 SV=1	12	0.999	1.91	0.602	0.636	1.019	0.676	0.877	0.996	1.497	0.855	0	0.93	-0.73	-0.65	0.03	-0.57	-0.19	-0.01	0.58	-0.23
Q37652	Cytochrome c oxidase subunit 2 OS=Rattus norvegicus OX=10116 GN=COXII PE=3 SV=1	6	1.087	1.062	1.249	1.294	1.258	0.934	1.128	1.069	1.15	1.256	0.12	0.09	0.32	0.37	0.33	-0.1	0.17	0.1	0.2	0.33
P62836	Ras-related protein Rap-1A OS=Rattus norvegicus OX=10116 GN=Rap1a PE=1 SV=1	9	0.935	0.954	1.012	1.003	1.072	0.837	1.071	0.999	1.049	0.934	-0.1	-0.07	0.02	0	0.1	-0.26	0.1	0	0.07	-0.1
A0A0H2UHI7	ATPase family, AAA domain containing 1 OS=Rattus norvegicus OX=10116 GN=Atad1 PE=1 SV=1	11	0.893	0.949	0.997	0.87	1.029	0.736	1.049	1.007	1.085	1.094	-0.16	-0.08	0	-0.2	0.04	-0.44	0.07	0.01	0.12	0.13
P13697	NADP-dependent malic enzyme OS=Rattus norvegicus OX=10116 GN=Me1 PE=1 SV=2	14	1.312	1.149	0.939	1.036	1.033	1.181	0.917	0.929	0.95	0.888	0.39	0.2	-0.09	0.05	0.05	0.24	-0.12	-0.11	-0.07	-0.17
A2VCW8	Septin OS=Rattus norvegicus OX=10116 GN=Septin7 PE=1 SV=1	15	0.867	0.89	0.949	0.991	1.051	1.189	1.023	0.994	0.98	0.987	-0.21	-0.17	-0.08	-0.01	0.07	0.25	0.03	-0.01	-0.03	-0.02
A0A0G2JXM1	Catenin delta 1 OS=Rattus norvegicus OX=10116 GN=Ctnnd1 PE=1 SV=1	19	0.929	1.041	0.963	0.971	1.048	1.055	0.958	1.063	1.009	1.094	-0.11	0.06	-0.05	-0.04	0.07	0.08	-0.06	0.09	0.01	0.13
Q8K1Q0	Glycylpeptide N-tetradecanoyltransferase 1 OS=Rattus norvegicus OX=10116 GN=Nmt1 PE=1 SV=1	12	0.904	0.893	0.956	0.968	1.007	0.909	1.06	0.945	1.05	1.066	-0.15	-0.16	-0.07	-0.05	0.01	-0.14	0.08	-0.08	0.07	0.09
Q9ER30	Kelch-like protein 41 OS=Rattus norvegicus OX=10116 GN=Klhl41 PE=1 SV=1	16	1.176	1.272	0.942	0.993	0.998	0.928	1.03	1.015	1.019	1.045	0.23	0.35	-0.09	-0.01	0	-0.11	0.04	0.02	0.03	0.06
A0JPM9	Eukaryotic translation initiation factor 3 subunit J OS=Rattus norvegicus OX=10116 GN=Eif3j PE=1 SV=1	12	0.699	0.786	0.936	0.88	0.989	1.019	1.201	1.022	1.169	1.258	-0.52	-0.35	-0.1	-0.18	-0.02	0.03	0.26	0.03	0.23	0.33
A0A8I6AD94	EMAP like 1 OS=Rattus norvegicus OX=10116 GN=Eml1 PE=1 SV=1	16	0.92	0.904	0.954	1.013	1.027	0.926	1.022	1.002	1.013	1.039	-0.12	-0.15	-0.07	0.02	0.04	-0.11	0.03	0	0.02	0.06
Q9ER24	Ataxin-10 OS=Rattus norvegicus OX=10116 GN=Atxn10 PE=1 SV=1	15	0.902	1.022	0.951	0.975	1.045	1.003	0.984	1	0.993	1.029	-0.15	0.03	-0.07	-0.04	0.06	0	-0.02	0	-0.01	0.04
D3ZLD5	Golgin A3 OS=Rattus norvegicus OX=10116 GN=Golga3 PE=1 SV=2	16	1.068	1.099	0.881	1.048	0.977	0.894	1.024	1.078	0.998	0.952	0.1	0.14	-0.18	0.07	-0.03	-0.16	0.03	0.11	0	-0.07
B0BNK1	RAB5C, member RAS oncogene family OS=Rattus norvegicus OX=10116 GN=Rab5c PE=1 SV=1	8	0.864	1.115	0.958	0.958	0.996	1.197	1.069	0.997	1.079	1.018	-0.21	0.16	-0.06	-0.06	-0.01	0.26	0.1	0	0.11	0.03
A0A8I6AEE2	Kynurenine aminotransferase 1 OS=Rattus norvegicus OX=10116 GN=Kyat1 PE=1 SV=1	11	0.919	0.974	0.93	1.053	1.057	0.904	1.009	1.031	0.97	0.964	-0.12	-0.04	-0.1	0.08	0.08	-0.15	0.01	0.04	-0.04	-0.05
A0A8I5ZMY9	10 kDa heat shock protein, mitochondrial OS=Rattus norvegicus OX=10116 GN=Hspe1 PE=1 SV=1	11	1.007	0.883	0.986	1.096	1.096	0.863	1.064	1.038	0.992	1.004	0.01	-0.18	-0.02	0.13	0.13	-0.21	0.09	0.05	-0.01	0.01
F8WFS9	Adducin 2 OS=Rattus norvegicus OX=10116 GN=Add2 PE=1 SV=1	12	0.824	1.553	0.756	1.01	0.835	1.619	0.935	1.132	1.082	0.762	-0.28	0.64	-0.4	0.01	-0.26	0.69	-0.1	0.18	0.11	-0.39
Q9QYU2	Elongation factor Ts, mitochondrial OS=Rattus norvegicus OX=10116 GN=Tsfm PE=2 SV=1	6	0.93	0.935	0.981	0.96	0.99	0.875	1.027	1.011	1.029	0.987	-0.1	-0.1	-0.03	-0.06	-0.01	-0.19	0.04	0.02	0.04	-0.02
P63031	Mitochondrial pyruvate carrier 1 OS=Rattus norvegicus OX=10116 GN=Mpc1 PE=3 SV=1	6	0.844	0.607	1.014	0.937	1.06	0.545	1.052	0.914	1.026	1.171	-0.25	-0.72	0.02	-0.09	0.08	-0.88	0.07	-0.13	0.04	0.23
A0A8I6AVF8	Serine/threonine-protein phosphatase 2A 55 kDa regulatory subunit B OS=Rattus norvegicus OX=10116 GN=Ppp2r2a PE=1 SV=1	11	0.924	0.973	0.989	1.02	1.03	0.876	1.079	1.085	1.046	1.063	-0.11	-0.04	-0.02	0.03	0.04	-0.19	0.11	0.12	0.06	0.09
Q5XIM0	Mitochondrial chaperone BCS1 OS=Rattus norvegicus OX=10116 GN=Bcs1l PE=1 SV=1	10	0.914	0.838	0.965	1.005	1.018	0.753	1.008	0.967	1.032	0.999	-0.13	-0.26	-0.05	0.01	0.03	-0.41	0.01	-0.05	0.04	0
Q5M8A0	Kng2 protein OS=Rattus norvegicus OX=10116 GN=Kng2l1 PE=2 SV=1	13	0.928	1.316	0.83	0.889	0.823	2.101	0.911	1.057	0.946	0.844	-0.11	0.4	-0.27	-0.17	-0.28	1.07	-0.13	0.08	-0.08	-0.24
A0A8I6A9H4	NAD(P)(+)--arginine ADP-ribosyltransferase OS=Rattus norvegicus OX=10116 GN=Art3 PE=3 SV=1	10	0.982	1.193	0.984	1.016	1.041	0.873	1.022	1.039	1.006	0.973	-0.03	0.25	-0.02	0.02	0.06	-0.2	0.03	0.06	0.01	-0.04
D4A5E5	Beta-sarcoglycan OS=Rattus norvegicus OX=10116 GN=Sgcb PE=3 SV=3	11	0.965	0.979	1.041	0.987	1.021	0.837	1.034	1.049	1.058	1.05	-0.05	-0.03	0.06	-0.02	0.03	-0.26	0.05	0.07	0.08	0.07
A0A8L2QEH3	40S ribosomal protein S19 OS=Rattus norvegicus OX=10116 GN=Rps19 PE=3 SV=1	11	1.033	1.154	1.037	1.079	1.075	0.862	1	0.979	0.959	0.995	0.05	0.21	0.05	0.11	0.1	-0.21	0	-0.03	-0.06	-0.01
A0A0G2JWE0	Pyruvate dehydrogenase phosphatase catalytic subunit 1 OS=Rattus norvegicus OX=10116 GN=Pdp1 PE=1 SV=1	13	1.086	1.389	0.9	1.164	1.02	1.11	1.022	1.125	1.019	0.871	0.12	0.47	-0.15	0.22	0.03	0.15	0.03	0.17	0.03	-0.2
A0A8I6AKF5	Synaptopodin OS=Rattus norvegicus OX=10116 GN=Synpo PE=1 SV=1	12	1.017	1.031	0.941	0.97	0.995	0.946	0.995	1.063	0.992	1.023	0.02	0.04	-0.09	-0.04	-0.01	-0.08	-0.01	0.09	-0.01	0.03
A0A8I5YCE2	Solute carrier family 27 member 1 OS=Rattus norvegicus OX=10116 GN=Slc27a1 PE=1 SV=1	12	0.898	0.835	1.01	0.948	1.069	0.747	1.02	1.004	1.048	1.098	-0.16	-0.26	0.01	-0.08	0.1	-0.42	0.03	0.01	0.07	0.13
Q3B8Q2	Eukaryotic initiation factor 4A-III OS=Rattus norvegicus OX=10116 GN=Eif4a3 PE=1 SV=1	14	0.959	1.024	1.057	1.034	1.122	1.122	1.154	1.063	1.11	1.136	-0.06	0.03	0.08	0.05	0.17	0.17	0.21	0.09	0.15	0.18
P32198	Carnitine O-palmitoyltransferase 1, liver isoform OS=Rattus norvegicus OX=10116 GN=Cpt1a PE=1 SV=2	14	0.878	1.016	0.943	0.938	1.065	0.951	0.984	1.143	1.039	1.09	-0.19	0.02	-0.08	-0.09	0.09	-0.07	-0.02	0.19	0.06	0.12
A0A8I5ZNK4	60S ribosomal protein L13 OS=Rattus norvegicus OX=10116 GN=ENSRNOG00000062895 PE=3 SV=1	11	0.982	0.986	1.08	1.073	1.025	1.04	0.989	1.022	0.971	1.009	-0.03	-0.02	0.11	0.1	0.04	0.06	-0.02	0.03	-0.04	0.01
P29419	ATP synthase subunit e, mitochondrial OS=Rattus norvegicus OX=10116 GN=Atp5me PE=1 SV=3	8	1.086	0.806	1.006	1.003	1.069	0.622	1.081	0.974	1.014	1.042	0.12	-0.31	0.01	0	0.1	-0.68	0.11	-0.04	0.02	0.06
F1LPV0	asparagine--tRNA ligase OS=Rattus norvegicus OX=10116 GN=Nars1 PE=1 SV=2	15	0.887	1.171	0.893	0.971	0.969	1.261	0.986	1.112	1.013	0.925	-0.17	0.23	-0.16	-0.04	-0.05	0.33	-0.02	0.15	0.02	-0.11
Q80W59	Histidine-rich calcium binding protein OS=Rattus norvegicus OX=10116 GN=Hrc PE=2 SV=1	10	0.829	0.628	0.868	0.748	0.933	0.459	1.161	1.037	1.117	1.347	-0.27	-0.67	-0.2	-0.42	-0.1	-1.12	0.22	0.05	0.16	0.43
D3Z8W5	Ube2l3 protein OS=Rattus norvegicus OX=10116 GN=Ube2l3 PE=1 SV=2	9	0.873	0.939	0.994	0.96	0.991	1.12	0.999	0.977	1.006	1.038	-0.2	-0.09	-0.01	-0.06	-0.01	0.16	0	-0.03	0.01	0.05
B5DF46	Phosphomannomutase OS=Rattus norvegicus OX=10116 GN=Pmm2 PE=2 SV=1	10	1.087	1.133	0.962	1.095	1.035	0.854	1.014	1.001	1.004	0.973	0.12	0.18	-0.06	0.13	0.05	-0.23	0.02	0	0.01	-0.04
P81795	Eukaryotic translation initiation factor 2 subunit 3, X-linked OS=Rattus norvegicus OX=10116 GN=Eif2s3 PE=1 SV=2	12	0.965	0.993	1.016	0.967	1.039	0.991	1.085	1.072	1.048	1.175	-0.05	-0.01	0.02	-0.05	0.06	-0.01	0.12	0.1	0.07	0.23
Q62847	Gamma-adducin OS=Rattus norvegicus OX=10116 GN=Add3 PE=1 SV=3	13	0.884	1.13	0.912	0.925	0.98	1.335	0.929	1.075	1.027	0.983	-0.18	0.18	-0.13	-0.11	-0.03	0.42	-0.11	0.1	0.04	-0.03
Q99PV2	Syntaxin binding protein 3 OS=Rattus norvegicus OX=10116 GN=Stxbp3 PE=1 SV=1	14	0.773	0.755	1.083	0.98	1.044	0.874	1.096	0.96	1.105	1.202	-0.37	-0.4	0.11	-0.03	0.06	-0.19	0.13	-0.06	0.14	0.27
D4AEH3	Proteasome 26S subunit, non-ATPase 7 OS=Rattus norvegicus OX=10116 GN=Psmd7 PE=1 SV=2	10	0.765	1.056	0.933	0.878	0.994	1.039	0.959	0.938	0.984	0.958	-0.39	0.08	-0.1	-0.19	-0.01	0.05	-0.06	-0.09	-0.02	-0.06
B2RYJ3	RGD1563853 protein OS=Rattus norvegicus OX=10116 GN=Cul4a PE=2 SV=1	19	0.83	0.901	1.007	0.92	1.048	0.827	1.046	1.032	1.075	1.117	-0.27	-0.15	0.01	-0.12	0.07	-0.27	0.06	0.05	0.1	0.16
D4A6H8	Catenin (Cadherin associated protein), alpha 2 (Predicted), isoform CRA_b OS=Rattus norvegicus OX=10116 GN=Ctnna2 PE=1 SV=4	9	1.065	0.959	1.19	1.151	1.117	0.581	1.04	1.099	0.921	1.012	0.09	-0.06	0.25	0.2	0.16	-0.78	0.06	0.14	-0.12	0.02
A0A1W2Q6Q0	Osteoglycin OS=Rattus norvegicus OX=10116 GN=Ogn PE=1 SV=1	9	0.973	1.739	0.802	0.981	0.895	1.99	0.841	1.156	0.855	0.755	-0.04	0.8	-0.32	-0.03	-0.16	0.99	-0.25	0.21	-0.23	-0.41
P06214	Delta-aminolevulinic acid dehydratase OS=Rattus norvegicus OX=10116 GN=Alad PE=1 SV=1	10	0.875	0.965	0.901	0.973	1.022	1.027	0.958	0.993	0.971	0.954	-0.19	-0.05	-0.15	-0.04	0.03	0.04	-0.06	-0.01	-0.04	-0.07
A0A8L2Q7F2	Heat shock protein 2 OS=Rattus norvegicus OX=10116 GN=Hspb2 PE=3 SV=1	7	0.96	1.196	0.931	0.934	1.011	0.996	0.993	0.95	1.033	1.019	-0.06	0.26	-0.1	-0.1	0.02	-0.01	-0.01	-0.07	0.05	0.03
F1LST4	Microtubule-associated protein OS=Rattus norvegicus OX=10116 GN=Mapt PE=1 SV=2	14	0.966	0.873	1.008	1.03	1.114	0.763	1.083	1.017	1.076	1.214	-0.05	-0.2	0.01	0.04	0.16	-0.39	0.11	0.02	0.11	0.28
G3V6R7	3-oxoacyl-[acyl-carrier-protein] synthase, mitochondrial OS=Rattus norvegicus OX=10116 GN=Oxsm PE=1 SV=1	10	1.006	1.002	1.014	1.059	1.022	0.989	1.069	1.029	0.978	0.982	0.01	0	0.02	0.08	0.03	-0.02	0.1	0.04	-0.03	-0.03
P12075	Cytochrome c oxidase subunit 5B, mitochondrial OS=Rattus norvegicus OX=10116 GN=Cox5b PE=1 SV=2	7	1.144	0.899	0.851	1.155	1.152	0.815	1.081	1.111	0.981	0.859	0.19	-0.15	-0.23	0.21	0.2	-0.29	0.11	0.15	-0.03	-0.22
A0A8I5ZS50	Tripartite motif-containing 54 OS=Rattus norvegicus OX=10116 GN=Trim54 PE=4 SV=1	11	0.976	1.066	1.016	0.986	1.087	0.785	1.124	1.017	1.081	1.065	-0.04	0.09	0.02	-0.02	0.12	-0.35	0.17	0.02	0.11	0.09
A0A8I5ZYA8	ER membrane protein complex subunit 1 OS=Rattus norvegicus OX=10116 GN=Emc1 PE=1 SV=1	15	0.937	0.982	0.95	1.04	1.088	0.933	1.066	0.992	1.012	0.944	-0.09	-0.03	-0.07	0.06	0.12	-0.1	0.09	-0.01	0.02	-0.08
A0A8I6AK10	Fascin OS=Rattus norvegicus OX=10116 GN=Fscn1 PE=1 SV=1	14	0.984	1.042	0.972	1.049	1.069	1.065	1.081	0.99	1.063	1.077	-0.02	0.06	-0.04	0.07	0.1	0.09	0.11	-0.01	0.09	0.11
Q6MG60	N(G),N(G)-dimethylarginine dimethylaminohydrolase 2 OS=Rattus norvegicus OX=10116 GN=Ddah2 PE=1 SV=1	9	0.891	0.983	0.932	0.989	1.056	1.179	1.002	1.023	1.017	1.021	-0.17	-0.02	-0.1	-0.02	0.08	0.24	0	0.03	0.02	0.03
B2RYX1	Complex III subunit 9 OS=Rattus norvegicus OX=10116 GN=Uqcr10 PE=1 SV=1	9	0.739	0.547	0.938	0.835	1.053	0.493	1.031	0.866	0.953	0.957	-0.44	-0.87	-0.09	-0.26	0.07	-1.02	0.04	-0.21	-0.07	-0.06
A0A140TAB4	Core histone macro-H2A OS=Rattus norvegicus OX=10116 GN=Macroh2a1 PE=1 SV=2	12	1.043	1.124	0.958	1.153	0.947	1.129	0.935	1.116	0.923	0.822	0.06	0.17	-0.06	0.21	-0.08	0.17	-0.1	0.16	-0.11	-0.28
A0A8I6AL00	NADH dehydrogenase [ubiquinone] iron-sulfur protein 8, mitochondrial OS=Rattus norvegicus OX=10116 GN=Ndufs8 PE=1 SV=1	8	0.912	0.659	1.001	0.956	1.064	0.596	1.103	0.99	1.033	1.166	-0.13	-0.6	0	-0.06	0.09	-0.75	0.14	-0.01	0.05	0.22
A0A8I5Y9V4	cysteine--tRNA ligase OS=Rattus norvegicus OX=10116 GN=Cars1 PE=1 SV=1	11	0.832	1.096	0.949	0.98	0.997	1.348	1.052	0.901	0.988	1.049	-0.26	0.13	-0.07	-0.03	0	0.43	0.07	-0.15	-0.02	0.07
A0A140TAE6	Mitochondrial trans-2-enoyl-CoA reductase OS=Rattus norvegicus OX=10116 GN=Mecr PE=1 SV=1	8	0.953	0.862	1.003	1.025	1.047	0.96	1.029	1.029	1.009	0.996	-0.07	-0.21	0	0.04	0.07	-0.06	0.04	0.04	0.01	-0.01
Q03346	Mitochondrial-processing peptidase subunit beta OS=Rattus norvegicus OX=10116 GN=Pmpcb PE=1 SV=3	13	0.997	0.856	1.092	1.02	1.088	0.898	1.105	1.031	1.101	1.211	0	-0.22	0.13	0.03	0.12	-0.16	0.14	0.04	0.14	0.28
A0A8I6AWT3	Histone H2A OS=Rattus norvegicus OX=10116 GN=ENSRNOG00000062927 PE=3 SV=1	6	0.805	0.798	0.919	1.028	0.968	1.095	0.886	0.909	0.824	0.792	-0.31	-0.33	-0.12	0.04	-0.05	0.13	-0.17	-0.14	-0.28	-0.34
D3ZXK7	E3 ubiquitin-protein ligase RNF123 OS=Rattus norvegicus OX=10116 GN=Rnf123 PE=1 SV=1	14	0.785	1.048	0.931	0.897	0.98	1.162	1.008	1.062	1.085	1.002	-0.35	0.07	-0.1	-0.16	-0.03	0.22	0.01	0.09	0.12	0
Q6P6T9	Importin subunit alpha OS=Rattus norvegicus OX=10116 GN=Kpna2 PE=1 SV=1	10	1.044	0.935	1.001	1.008	1.073	0.935	1.056	1.025	1.026	1.032	0.06	-0.1	0	0.01	0.1	-0.1	0.08	0.04	0.04	0.05
P62138	Serine/threonine-protein phosphatase PP1-alpha catalytic subunit OS=Rattus norvegicus OX=10116 GN=Ppp1ca PE=1 SV=1	10	1.049	1.143	0.885	1.024	0.972	1.103	0.94	0.967	0.939	0.832	0.07	0.19	-0.18	0.03	-0.04	0.14	-0.09	-0.05	-0.09	-0.27
Q641X8	Eukaryotic translation initiation factor 3 subunit E OS=Rattus norvegicus OX=10116 GN=Eif3e PE=2 SV=1	13	0.955	1.177	0.937	0.955	1.026	1.022	1.022	1.041	1.042	0.988	-0.07	0.24	-0.09	-0.07	0.04	0.03	0.03	0.06	0.06	-0.02
A0A8L2QJT5	Sulfurtransferase OS=Rattus norvegicus OX=10116 GN=Tst PE=1 SV=1	10	0.983	1.144	0.967	1.04	1.026	0.98	1.034	1.086	0.987	0.99	-0.02	0.19	-0.05	0.06	0.04	-0.03	0.05	0.12	-0.02	-0.01
F1LQB2	Structural maintenance of chromosomes protein OS=Rattus norvegicus OX=10116 GN=Smc3 PE=1 SV=2	14	1.048	1.138	0.981	1.06	1.06	1.132	1.048	1.093	1.069	0.948	0.07	0.19	-0.03	0.08	0.08	0.18	0.07	0.13	0.1	-0.08
B0K020	CDGSH iron-sulfur domain-containing protein 1 OS=Rattus norvegicus OX=10116 GN=Cisd1 PE=3 SV=1	7	0.909	0.816	1.033	0.961	1.015	0.73	1.071	0.971	1.049	1.063	-0.14	-0.29	0.05	-0.06	0.02	-0.45	0.1	-0.04	0.07	0.09
A0A0H2UHL5	Arp2/3 complex 34 kDa subunit OS=Rattus norvegicus OX=10116 GN=Arpc2 PE=1 SV=1	14	0.971	1.161	0.975	0.99	0.909	1.169	0.986	1.031	1.052	1.038	-0.04	0.22	-0.04	-0.01	-0.14	0.22	-0.02	0.04	0.07	0.05
Q4KM66	LOC500183 protein OS=Rattus norvegicus OX=10116 GN=LOC500183 PE=1 SV=1	6	0.95	1.788	0.475	0.792	0.889	1.653	0.978	1.084	0.97	0.646	-0.07	0.84	-1.07	-0.34	-0.17	0.72	-0.03	0.12	-0.04	-0.63
F1LQQ7	Sodium channel protein OS=Rattus norvegicus OX=10116 GN=Scn7a PE=1 SV=4	14	0.864	1.28	0.834	0.962	0.974	1.267	0.898	1.129	0.923	0.899	-0.21	0.36	-0.26	-0.06	-0.04	0.34	-0.16	0.18	-0.12	-0.15
D4A4D5	60S acidic ribosomal protein P2 OS=Rattus norvegicus OX=10116 GN=LOC498555 PE=3 SV=1	6	1.154	1.07	0.969	1.013	1.071	1.264	1.021	1.036	0.994	1.11	0.21	0.1	-0.05	0.02	0.1	0.34	0.03	0.05	-0.01	0.15
P27008	Poly [ADP-ribose] polymerase 1 OS=Rattus norvegicus OX=10116 GN=Parp1 PE=1 SV=4	15	1.115	1.323	1.154	1.242	1.03	1.303	0.964	1.116	0.866	0.925	0.16	0.4	0.21	0.31	0.04	0.38	-0.05	0.16	-0.21	-0.11
A0A8I5XWI2	Syntaxin 12 OS=Rattus norvegicus OX=10116 GN=Stx12 PE=1 SV=1	8	0.936	1.295	0.855	0.966	0.996	1.181	0.953	0.983	0.975	1.03	-0.09	0.37	-0.23	-0.05	-0.01	0.24	-0.07	-0.02	-0.04	0.04
Q561R9	Endoribonuclease LACTB2 OS=Rattus norvegicus OX=10116 GN=Lactb2 PE=2 SV=1	13	1.005	0.904	0.936	1.019	1.036	0.785	0.965	0.969	0.946	0.967	0.01	-0.15	-0.09	0.03	0.05	-0.35	-0.05	-0.05	-0.08	-0.05
Q6NYB8	Ifi47 protein OS=Rattus norvegicus OX=10116 GN=Ifi47 PE=2 SV=1	13	0.884	0.825	0.88	0.957	1.056	0.905	1.087	0.926	1.151	1.058	-0.18	-0.28	-0.18	-0.06	0.08	-0.14	0.12	-0.11	0.2	0.08
Q91YB6	Complement inhibitory factor H OS=Rattus norvegicus OX=10116 GN=Cfh PE=2 SV=1	15	0.778	1.312	0.832	0.964	0.798	2.355	0.896	1.079	0.998	0.848	-0.36	0.39	-0.27	-0.05	-0.32	1.24	-0.16	0.11	0	-0.24
A0A8I5ZKM3	Syntaxin 4 OS=Rattus norvegicus OX=10116 GN=Stx4 PE=1 SV=1	10	0.957	1.058	0.99	1.012	1.034	0.875	1.012	1.005	1.035	1.012	-0.06	0.08	-0.01	0.02	0.05	-0.19	0.02	0.01	0.05	0.02
A0A343F2V2	Cytochrome c oxidase subunit 2 OS=Berylmys berdmorei OX=595394 GN=COX2 PE=3 SV=1	5	1.013	0.715	1.045	0.957	1.03	0.567	1.077	0.999	1.158	1.148	0.02	-0.48	0.06	-0.06	0.04	-0.82	0.11	0	0.21	0.2
Q5PQN7	Protein LZIC OS=Rattus norvegicus OX=10116 GN=Lzic PE=2 SV=1	11	0.851	0.9	0.924	1.006	1.046	1.024	1.045	0.982	1.045	1.054	-0.23	-0.15	-0.11	0.01	0.07	0.03	0.06	-0.03	0.06	0.08
Q7TP91	Surfeit locus protein 1 OS=Rattus norvegicus OX=10116 GN=Surf1 PE=1 SV=1	11	0.866	0.967	0.962	0.919	0.976	0.972	1.026	1.01	1.078	1.045	-0.21	-0.05	-0.06	-0.12	-0.04	-0.04	0.04	0.01	0.11	0.06
A0A0H2UHX3	40S ribosomal protein S4 OS=Rattus norvegicus OX=10116 GN=Rps4x PE=1 SV=1	13	0.779	0.91	1.047	0.968	1.071	0.845	1.105	1.067	1.099	1.14	-0.36	-0.14	0.07	-0.05	0.1	-0.24	0.14	0.09	0.14	0.19
A0A8L2QSH6	Calcium-transporting ATPase OS=Rattus norvegicus OX=10116 GN=Atp2b1 PE=1 SV=1	16	0.958	1.034	0.978	1.003	1	1.15	1.012	1.086	1.08	1.016	-0.06	0.05	-0.03	0	0	0.2	0.02	0.12	0.11	0.02
M0R719	MICOS complex subunit MIC13 OS=Rattus norvegicus OX=10116 GN=Micos13 PE=3 SV=2	6	0.801	0.711	0.909	0.867	1.014	1.177	0.946	0.921	0.94	0.95	-0.32	-0.49	-0.14	-0.21	0.02	0.24	-0.08	-0.12	-0.09	-0.07
Q5XIG9	Mitochondrial fission process protein 1 OS=Rattus norvegicus OX=10116 GN=Mtfp1 PE=1 SV=1	8	0.761	0.585	0.943	0.853	1.033	0.592	0.991	0.884	1.042	1.025	-0.39	-0.77	-0.09	-0.23	0.05	-0.76	-0.01	-0.18	0.06	0.04
G3V6H9	Nucleosome assembly protein 1-like 1 OS=Rattus norvegicus OX=10116 GN=Nap1l1 PE=1 SV=2	10	1.299	1.124	0.974	1.016	1.041	1.029	0.998	0.959	0.984	0.926	0.38	0.17	-0.04	0.02	0.06	0.04	0	-0.06	-0.02	-0.11
Q6AYZ4	Serine/threonine-protein phosphatase OS=Rattus norvegicus OX=10116 GN=Ppp1cc PE=2 SV=1	10	0.956	1.001	0.95	1.066	1.043	1.047	0.976	0.996	1.029	0.979	-0.06	0	-0.07	0.09	0.06	0.07	-0.03	-0.01	0.04	-0.03
A0A8I6AKY2	Endophilin-B1 OS=Rattus norvegicus OX=10116 GN=Sh3glb1 PE=1 SV=1	12	1.01	1.036	0.987	1.056	1.072	0.872	1.06	1.009	1.027	1.036	0.01	0.05	-0.02	0.08	0.1	-0.2	0.08	0.01	0.04	0.05
Q9WVR7	Protein phosphatase 1F OS=Rattus norvegicus OX=10116 GN=Ppm1f PE=2 SV=1	9	0.785	0.73	1.057	0.935	1.035	0.778	1.103	1.027	1.088	1.212	-0.35	-0.45	0.08	-0.1	0.05	-0.36	0.14	0.04	0.12	0.28
A0A0G2K046	Myopalladin OS=Rattus norvegicus OX=10116 GN=Mypn PE=1 SV=1	15	1.014	0.848	1.125	1.006	1.024	0.804	1.013	0.934	1.003	1.071	0.02	-0.24	0.17	0.01	0.03	-0.32	0.02	-0.1	0	0.1
D3ZIL6	Enoyl CoA hydratase domain containing 2 OS=Rattus norvegicus OX=10116 GN=Echdc2 PE=1 SV=1	8	0.832	0.909	0.913	0.949	1.002	0.828	0.963	0.98	0.96	0.96	-0.27	-0.14	-0.13	-0.08	0	-0.27	-0.05	-0.03	-0.06	-0.06
Q68FW7	Threonine--tRNA ligase, mitochondrial OS=Rattus norvegicus OX=10116 GN=Tars2 PE=2 SV=1	17	1.078	0.989	1.021	1.083	1.048	0.916	1.056	1.056	1.053	1.047	0.11	-0.02	0.03	0.11	0.07	-0.13	0.08	0.08	0.07	0.07
D4ABT8	Heterogeneous nuclear ribonucleoprotein U-like 2 OS=Rattus norvegicus OX=10116 GN=Hnrnpul2 PE=1 SV=2	15	1.05	1.371	0.896	1.064	1.16	1.141	0.999	1.13	1.026	0.92	0.07	0.46	-0.16	0.09	0.21	0.19	0	0.18	0.04	-0.12
D4A264	Zinc binding alcohol dehydrogenase, domain containing 2 OS=Rattus norvegicus OX=10116 GN=Ptgr3 PE=1 SV=3	9	0.896	0.816	0.961	0.945	1.014	0.876	1.029	0.979	0.987	1.002	-0.16	-0.29	-0.06	-0.08	0.02	-0.19	0.04	-0.03	-0.02	0
A0A8I6A8Y6	Splicing factor 3b, subunit 2 OS=Rattus norvegicus OX=10116 GN=Sf3b2 PE=1 SV=1	13	1.116	1.271	0.931	1.029	0.974	0.975	0.973	1.09	1.029	0.92	0.16	0.35	-0.1	0.04	-0.04	-0.04	-0.04	0.12	0.04	-0.12
A0A8I5ZPM4	Na(+)/H(+) exchange regulatory cofactor NHE-RF OS=Rattus norvegicus OX=10116 GN=Slc9a3r2 PE=1 SV=1	10	1.053	0.794	1.066	0.959	1.027	0.771	1.078	0.955	1.11	1.092	0.07	-0.33	0.09	-0.06	0.04	-0.38	0.11	-0.07	0.15	0.13
Q7TP54	Rho family-interacting cell polarization regulator 2 OS=Rattus norvegicus OX=10116 GN=Ripor2 PE=1 SV=1	7	0.977	1.559	1.065	1.04	0.788	1.782	0.908	0.983	0.925	0.766	-0.03	0.64	0.09	0.06	-0.34	0.83	-0.14	-0.03	-0.11	-0.38
B2RYK3	Sepiapterin reductase OS=Rattus norvegicus OX=10116 GN=Spr PE=1 SV=1	8	1.031	1.339	0.88	1.059	0.914	1.279	1.009	1.109	1.032	0.862	0.04	0.42	-0.18	0.08	-0.13	0.35	0.01	0.15	0.05	-0.21
A0A8I6AN00	Mitochondrial import inner membrane translocase subunit TIM50 OS=Rattus norvegicus OX=10116 GN=Timm50 PE=1 SV=1	10	0.917	0.965	0.929	0.92	1.106	0.975	1.045	1.09	1.047	1.091	-0.13	-0.05	-0.11	-0.12	0.15	-0.04	0.06	0.12	0.07	0.13
Q91ZW1	Transcription factor A, mitochondrial OS=Rattus norvegicus OX=10116 GN=Tfam PE=2 SV=1	14	1.06	0.937	1.021	1.05	1.08	0.805	1.068	1.031	1.063	1.038	0.08	-0.09	0.03	0.07	0.11	-0.31	0.09	0.04	0.09	0.05
A0A8I6A9F1	Pleckstrin homology-like domain, family B, member 1 OS=Rattus norvegicus OX=10116 GN=Phldb1 PE=1 SV=1	16	1.532	1.102	1.077	1.149	0.955	0.937	1.039	1.388	1.101	1.389	0.62	0.14	0.11	0.2	-0.07	-0.09	0.05	0.47	0.14	0.47
D3ZLS5	E3 ubiquitin-protein ligase OS=Rattus norvegicus OX=10116 GN=Hectd1 PE=1 SV=3	17	0.906	0.993	0.978	0.941	1.05	0.935	0.997	0.975	1.015	0.998	-0.14	-0.01	-0.03	-0.09	0.07	-0.1	0	-0.04	0.02	0
A0A8I5ZS45	Serine/threonine-protein phosphatase OS=Rattus norvegicus OX=10116 GN=Ppp5c PE=1 SV=1	11	1.02	0.931	1.047	1	1.092	0.837	1.021	0.961	0.999	1.064	0.03	-0.1	0.07	0	0.13	-0.26	0.03	-0.06	0	0.09
A0A8I6AF13	Aldehyde dehydrogenase 3 family, member A2 OS=Rattus norvegicus OX=10116 GN=Aldh3a2 PE=1 SV=1	12	1.049	1.249	0.885	1.014	0.98	1.138	0.944	0.988	0.93	0.874	0.07	0.32	-0.18	0.02	-0.03	0.19	-0.08	-0.02	-0.11	-0.19
Q64537	Calpain small subunit 1 OS=Rattus norvegicus OX=10116 GN=Capns1 PE=1 SV=3	8	0.921	1.111	1.068	1.059	1.058	1.253	0.999	0.986	1.026	1.008	-0.12	0.15	0.09	0.08	0.08	0.32	0	-0.02	0.04	0.01
D3ZFU9	Myosin light chain kinase, smooth muscle OS=Rattus norvegicus OX=10116 GN=Mylk PE=1 SV=3	13	0.81	1.135	0.842	0.9	0.913	2.864	0.943	1.071	0.896	0.898	-0.3	0.18	-0.25	-0.15	-0.13	1.52	-0.08	0.1	-0.16	-0.15
E7C9K7	NADH-ubiquinone oxidoreductase chain 4 OS=Rattus fuscipes OX=10119 GN=ND4 PE=3 SV=1	7	0.739	0.522	0.937	0.93	1.202	0.587	0.84	0.764	0.821	0.819	-0.44	-0.94	-0.09	-0.1	0.27	-0.77	-0.25	-0.39	-0.28	-0.29
Q9Z1H9	Caveolae-associated protein 3 OS=Rattus norvegicus OX=10116 GN=Cavin3 PE=1 SV=1	10	0.985	1.173	0.924	0.975	0.978	1.215	0.981	0.99	0.972	0.986	-0.02	0.23	-0.11	-0.04	-0.03	0.28	-0.03	-0.01	-0.04	-0.02
A0A0G2K189	Secernin 3 OS=Rattus norvegicus OX=10116 GN=Scrn3 PE=1 SV=1	12	0.957	0.858	1.005	1.013	1.079	0.981	1.102	1.011	1.039	1.14	-0.06	-0.22	0.01	0.02	0.11	-0.03	0.14	0.02	0.06	0.19
F1LT35	Similar to 60S ribosomal protein L23a OS=Rattus norvegicus OX=10116 GN=RGD1564606 PE=3 SV=2	11	0.808	0.917	1.053	0.951	1.041	0.852	1.091	1.202	1.094	1.204	-0.31	-0.12	0.07	-0.07	0.06	-0.23	0.13	0.27	0.13	0.27
Q6AYD3	Proliferation-associated protein 2G4 OS=Rattus norvegicus OX=10116 GN=Pa2g4 PE=1 SV=1	11	0.978	1.083	0.926	0.999	1.002	1.006	0.994	1.022	0.996	0.906	-0.03	0.11	-0.11	0	0	0.01	-0.01	0.03	-0.01	-0.14
A0A8I6ACU9	Mitochondrial import inner membrane translocase subunit TIM50 OS=Rattus norvegicus OX=10116 GN=Timm50 PE=1 SV=1	10	0.886	0.868	0.975	0.898	1.007	0.905	1.043	1.058	1.055	1.1	-0.17	-0.2	-0.04	-0.15	0.01	-0.14	0.06	0.08	0.08	0.14
P61203	COP9 signalosome complex subunit 2 OS=Rattus norvegicus OX=10116 GN=Cops2 PE=1 SV=1	11	0.907	0.941	0.956	0.966	1.108	0.986	1.031	1.04	1.051	1.16	-0.14	-0.09	-0.07	-0.05	0.15	-0.02	0.04	0.06	0.07	0.21
P19357	Solute carrier family 2, facilitated glucose transporter member 4 OS=Rattus norvegicus OX=10116 GN=Slc2a4 PE=1 SV=1	10	0.864	1.112	0.946	0.905	0.987	0.897	1.043	1.015	1.05	1.008	-0.21	0.15	-0.08	-0.14	-0.02	-0.16	0.06	0.02	0.07	0.01
P62494	Ras-related protein Rab-11A OS=Rattus norvegicus OX=10116 GN=Rab11a PE=1 SV=3	11	0.816	0.663	0.948	0.929	0.961	1.127	0.896	0.901	0.999	1.107	-0.29	-0.59	-0.08	-0.11	-0.06	0.17	-0.16	-0.15	0	0.15
Q5FVQ8	NLR family member X1 OS=Rattus norvegicus OX=10116 GN=Nlrx1 PE=2 SV=1	12	0.939	1.149	0.89	0.919	1.036	0.956	1.028	1.078	1.09	0.985	-0.09	0.2	-0.17	-0.12	0.05	-0.06	0.04	0.11	0.12	-0.02
A0A8I6A4H6	Actin related protein 1A OS=Rattus norvegicus OX=10116 GN=Actr1a PE=1 SV=1	11	0.868	0.96	0.961	0.93	1.025	0.89	1.033	0.994	1.064	1.014	-0.2	-0.06	-0.06	-0.1	0.04	-0.17	0.05	-0.01	0.09	0.02
D3ZLC1	Lamin B2 OS=Rattus norvegicus OX=10116 GN=Lmnb2 PE=1 SV=2	15	1.063	1.264	1.086	1.116	1.037	1.12	1.082	1.194	1.133	1.163	0.09	0.34	0.12	0.16	0.05	0.16	0.11	0.26	0.18	0.22
A0A0G2JX67	Prolyl endopeptidase OS=Rattus norvegicus OX=10116 GN=Prepl PE=1 SV=1	12	0.924	1.014	0.93	1.012	1.047	0.92	1.011	1.006	1.009	0.985	-0.11	0.02	-0.11	0.02	0.07	-0.12	0.02	0.01	0.01	-0.02
D3ZYS7	G3BP stress granule assembly factor 1 OS=Rattus norvegicus OX=10116 GN=G3bp1 PE=1 SV=1	11	0.881	0.848	0.946	0.942	1.01	0.801	1.033	0.993	1.006	1.041	-0.18	-0.24	-0.08	-0.09	0.02	-0.32	0.05	-0.01	0.01	0.06
G3V7Q6	Proteasome subunit beta OS=Rattus norvegicus OX=10116 GN=Psmb5 PE=1 SV=1	10	0.953	1.112	0.995	0.976	1.008	0.967	1.047	1.074	1.037	1.065	-0.07	0.15	-0.01	-0.04	0.01	-0.05	0.07	0.1	0.05	0.09
A0A8I6A7H5	Caseinolytic mitochondrial matrix peptidase chaperone subunit X OS=Rattus norvegicus OX=10116 GN=Clpx PE=1 SV=1	12	0.986	1.046	0.924	1.029	1.024	0.877	1.03	1.044	1.012	0.961	-0.02	0.06	-0.11	0.04	0.03	-0.19	0.04	0.06	0.02	-0.06
P62815	V-type proton ATPase subunit B, brain isoform OS=Rattus norvegicus OX=10116 GN=Atp6v1b2 PE=1 SV=1	12	0.915	1.045	0.918	1	1.001	1.008	1.016	1.058	1.001	0.948	-0.13	0.06	-0.12	0	0	0.01	0.02	0.08	0	-0.08
A0A8I6AAE1	AHNAK nucleoprotein OS=Rattus norvegicus OX=10116 GN=ENSRNOG00000065195 PE=1 SV=1	16	0.971	1.559	0.807	0.963	0.874	1.398	0.918	1.056	0.951	0.786	-0.04	0.64	-0.31	-0.05	-0.19	0.48	-0.12	0.08	-0.07	-0.35
A0A0G2K8K3	Serpin family D member 1 OS=Rattus norvegicus OX=10116 GN=Serpind1 PE=1 SV=2	9	0.876	1.576	0.782	1.004	0.896	1.71	0.929	1.128	0.912	0.801	-0.19	0.66	-0.35	0.01	-0.16	0.77	-0.11	0.17	-0.13	-0.32
P85973	Purine nucleoside phosphorylase OS=Rattus norvegicus OX=10116 GN=Pnp PE=1 SV=1	11	0.863	1.026	0.903	0.968	1.033	1.312	0.985	1.048	0.982	0.989	-0.21	0.04	-0.15	-0.05	0.05	0.39	-0.02	0.07	-0.03	-0.02
A0A0G2K1W1	RAB11 family interacting protein 5 OS=Rattus norvegicus OX=10116 GN=Rab11fip5 PE=1 SV=2	11	0.961	0.962	1.015	0.958	0.968	0.829	1.077	0.953	1.024	1.029	-0.06	-0.06	0.02	-0.06	-0.05	-0.27	0.11	-0.07	0.03	0.04
F1LRV6	GMP reductase OS=Rattus norvegicus OX=10116 GN=Gmpr PE=3 SV=1	11	0.979	0.836	1.02	1	1.109	0.76	1	1.008	1.033	1.073	-0.03	-0.26	0.03	0	0.15	-0.4	0	0.01	0.05	0.1
Q6QI16	RNA transcription, translation and transport factor protein OS=Rattus norvegicus OX=10116 GN=Rtraf PE=1 SV=1	13	0.939	1.024	0.982	0.942	1.001	0.966	0.997	0.93	1.001	1.001	-0.09	0.03	-0.03	-0.09	0	-0.05	0	-0.1	0	0
Q66HA6	ADP-ribosylation factor-like protein 8B OS=Rattus norvegicus OX=10116 GN=Arl8b PE=2 SV=1	8	0.927	0.933	0.968	0.967	1.011	0.852	1.013	0.915	0.961	0.997	-0.11	-0.1	-0.05	-0.05	0.02	-0.23	0.02	-0.13	-0.06	0
Q7M0E3	Destrin OS=Rattus norvegicus OX=10116 GN=Dstn PE=1 SV=3	9	0.801	0.925	0.926	0.854	0.954	1.583	0.965	1.059	0.968	0.978	-0.32	-0.11	-0.11	-0.23	-0.07	0.66	-0.05	0.08	-0.05	-0.03
E9PT82	Striatin 3 OS=Rattus norvegicus OX=10116 GN=Strn3 PE=1 SV=1	13	0.987	1.17	0.948	0.982	1.025	0.973	0.972	1.032	0.982	0.946	-0.02	0.23	-0.08	-0.03	0.04	-0.04	-0.04	0.04	-0.03	-0.08
P49242	40S ribosomal protein S3a OS=Rattus norvegicus OX=10116 GN=Rps3a PE=1 SV=2	12	0.793	0.883	1.109	0.919	0.932	0.886	0.997	0.934	0.998	1.16	-0.34	-0.18	0.15	-0.12	-0.1	-0.17	0	-0.1	0	0.21
P19836	Choline-phosphate cytidylyltransferase A OS=Rattus norvegicus OX=10116 GN=Pcyt1a PE=1 SV=2	11	0.989	1.179	1.012	1.055	1.049	1.071	0.989	1.001	0.983	1.013	-0.02	0.24	0.02	0.08	0.07	0.1	-0.02	0	-0.02	0.02
A0A1K0GY57	Cytoglobin, isoform CRA_b OS=Rattus norvegicus OX=10116 GN=Cygb PE=3 SV=1	10	0.935	1.1	0.905	1.077	1.043	1.024	1.015	0.989	1.031	0.962	-0.1	0.14	-0.14	0.11	0.06	0.03	0.02	-0.02	0.04	-0.06
D3ZBN0	Histone H1.5 OS=Rattus norvegicus OX=10116 GN=H1-5 PE=1 SV=1	11	1.374	1.092	1.203	1.361	1.083	1.124	0.785	0.929	0.727	0.717	0.46	0.13	0.27	0.44	0.11	0.17	-0.35	-0.11	-0.46	-0.48
A0A0G2JSH4	[tau protein] kinase OS=Rattus norvegicus OX=10116 GN=Gsk3b PE=1 SV=2	8	0.775	0.868	0.949	0.924	1.022	0.878	1.034	0.947	1.044	1.048	-0.37	-0.2	-0.08	-0.11	0.03	-0.19	0.05	-0.08	0.06	0.07
A0A8I5ZZJ8	Ubiquitin carboxyl-terminal hydrolase 7 OS=Rattus norvegicus OX=10116 GN=Usp7 PE=1 SV=1	13	0.928	1.301	0.795	0.992	0.92	0.99	0.909	1.036	0.923	0.809	-0.11	0.38	-0.33	-0.01	-0.12	-0.01	-0.14	0.05	-0.12	-0.3
Q6P7B0	Tryptophan--tRNA ligase, cytoplasmic OS=Rattus norvegicus OX=10116 GN=Wars1 PE=1 SV=2	8	0.909	0.951	1.024	1.011	1.069	0.962	1.094	1.008	1.112	1.078	-0.14	-0.07	0.03	0.02	0.1	-0.06	0.13	0.01	0.15	0.11
A0A8I6GKN2	Coatomer subunit beta' OS=Rattus norvegicus OX=10116 GN=Copb2 PE=1 SV=1	13	1.078	1.257	0.923	1.036	1.004	1.121	0.944	1.06	0.992	0.986	0.11	0.33	-0.12	0.05	0.01	0.16	-0.08	0.08	-0.01	-0.02
P18421	Proteasome subunit beta type-1 OS=Rattus norvegicus OX=10116 GN=Psmb1 PE=1 SV=3	8	0.993	1.084	0.949	1.001	1.034	1.098	0.993	1.016	1.036	0.93	-0.01	0.12	-0.08	0	0.05	0.13	-0.01	0.02	0.05	-0.11
Q64542	Plasma membrane calcium-transporting ATPase 4 OS=Rattus norvegicus OX=10116 GN=Atp2b4 PE=1 SV=1	13	0.733	1.545	0.836	1.022	0.825	2.545	0.929	1.052	0.927	0.851	-0.45	0.63	-0.26	0.03	-0.28	1.35	-0.11	0.07	-0.11	-0.23
A0A8I6A5E1	SWI/SNF related, matrix associated, actin dependent regulator of chromatin, subfamily c, member 2 OS=Rattus norvegicus OX=10116 GN=Smarcc2 PE=1 SV=1	16	1.106	1.136	0.888	1.055	0.977	1.163	0.891	1.032	0.966	0.998	0.15	0.18	-0.17	0.08	-0.03	0.22	-0.17	0.05	-0.05	0
Q00972	[3-methyl-2-oxobutanoate dehydrogenase [lipoamide]] kinase, mitochondrial OS=Rattus norvegicus OX=10116 GN=Bckdk PE=1 SV=2	9	0.882	0.993	0.92	0.935	1.002	0.868	1.117	1.109	1.113	1.065	-0.18	-0.01	-0.12	-0.1	0	-0.2	0.16	0.15	0.15	0.09
Q6AXT0	39S ribosomal protein L37, mitochondrial OS=Rattus norvegicus OX=10116 GN=Mrpl37 PE=2 SV=1	12	0.878	0.999	1.04	1.057	1.054	0.891	1.129	1.081	1.132	1.176	-0.19	0	0.06	0.08	0.08	-0.17	0.18	0.11	0.18	0.23
A0A8I6ARZ5	Mannose-6-phosphate isomerase OS=Rattus norvegicus OX=10116 GN=Mpi PE=1 SV=1	7	0.945	0.926	1.002	1.032	1.101	0.907	1.03	1.022	1.002	1.042	-0.08	-0.11	0	0.05	0.14	-0.14	0.04	0.03	0	0.06
A0A0G2K9V6	threonine--tRNA ligase OS=Rattus norvegicus OX=10116 GN=Tars1 PE=1 SV=1	14	1.033	1.196	0.903	1.057	1.042	1.3	1.009	1.061	1.029	0.988	0.05	0.26	-0.15	0.08	0.06	0.38	0.01	0.09	0.04	-0.02
F1LYS7	Sarcoglycan, delta OS=Rattus norvegicus OX=10116 GN=Sgcd PE=3 SV=4	10	0.956	0.846	1.036	0.978	1.101	0.685	1.06	1.034	1.048	1.13	-0.06	-0.24	0.05	-0.03	0.14	-0.55	0.08	0.05	0.07	0.18
A0A8I5ZJK0	ADP-ribosylation factor OS=Rattus norvegicus OX=10116 GN=Arf4 PE=1 SV=1	8	0.719	1.302	0.796	0.868	0.917	1.642	0.979	0.973	0.992	0.937	-0.48	0.38	-0.33	-0.2	-0.13	0.72	-0.03	-0.04	-0.01	-0.09
A0A8I5Y7D3	Ketimine reductase mu-crystallin OS=Rattus norvegicus OX=10116 GN=Crym PE=1 SV=1	10	1.043	0.603	1.032	1.008	1.109	0.704	1.103	0.844	1.102	1.189	0.06	-0.73	0.05	0.01	0.15	-0.51	0.14	-0.24	0.14	0.25
Q62698	Cytoplasmic dynein 1 light intermediate chain 2 OS=Rattus norvegicus OX=10116 GN=Dync1li2 PE=1 SV=1	10	0.749	1.165	0.808	0.878	1.042	1.669	0.954	1.126	0.998	0.916	-0.42	0.22	-0.31	-0.19	0.06	0.74	-0.07	0.17	0	-0.13
P35815	Protein phosphatase 1B OS=Rattus norvegicus OX=10116 GN=Ppm1b PE=2 SV=1	10	0.5	0.448	0.825	0.675	0.99	0.432	0.807	0.68	0.747	0.727	-1	-1.16	-0.28	-0.57	-0.01	-1.21	-0.31	-0.56	-0.42	-0.46
Q5XI07	Lipoma-preferred partner homolog OS=Rattus norvegicus OX=10116 GN=Lpp PE=1 SV=1	12	0.896	1.576	0.78	0.902	0.862	1.765	0.913	0.992	0.904	0.842	-0.16	0.66	-0.36	-0.15	-0.21	0.82	-0.13	-0.01	-0.15	-0.25
A0A8L2QZ13	Ras homolog family member A OS=Rattus norvegicus OX=10116 GN=Rhoa PE=1 SV=1	8	0.845	1.019	0.999	0.926	0.941	1.14	0.981	0.927	1.01	1.057	-0.24	0.03	0	-0.11	-0.09	0.19	-0.03	-0.11	0.01	0.08
Q5PQN5	Tripartite motif-containing protein 55 OS=Rattus norvegicus OX=10116 GN=Trim55 PE=1 SV=1	9	0.992	1.02	1.138	1.059	1.127	0.896	1.088	1.067	1.022	1.256	-0.01	0.03	0.19	0.08	0.17	-0.16	0.12	0.09	0.03	0.33
Q9JHL4	Drebrin-like protein OS=Rattus norvegicus OX=10116 GN=Dbnl PE=1 SV=1	11	0.89	1.04	0.957	1.003	1.036	1.115	1.01	0.99	1.017	1.044	-0.17	0.06	-0.06	0	0.05	0.16	0.02	-0.01	0.02	0.06
A0A8L2Q5I9	ADP-ribosylation factor 5 OS=Rattus norvegicus OX=10116 GN=Arf5 PE=1 SV=1	9	0.74	1.839	0.902	0.955	0.959	1.275	0.975	0.974	1.008	0.907	-0.44	0.88	-0.15	-0.07	-0.06	0.35	-0.04	-0.04	0.01	-0.14
P17077	60S ribosomal protein L9 OS=Rattus norvegicus OX=10116 GN=Rpl9 PE=1 SV=1	9	0.729	0.851	1.042	0.916	1.026	0.805	1.031	1.011	1.012	1.069	-0.46	-0.23	0.06	-0.13	0.04	-0.31	0.04	0.02	0.02	0.1
A0A0G2JXC1	Lectin, mannose-binding, 1 OS=Rattus norvegicus OX=10116 GN=Lman1 PE=1 SV=2	12	0.962	1.213	0.936	1.063	1.013	1.07	1.07	1.064	1.002	0.993	-0.06	0.28	-0.1	0.09	0.02	0.1	0.1	0.09	0	-0.01
P63004	Platelet-activating factor acetylhydrolase IB subunit alpha OS=Rattus norvegicus OX=10116 GN=Pafah1b1 PE=1 SV=2	14	0.918	1.104	0.92	1.07	1.053	1.063	1.039	1.065	0.99	0.993	-0.12	0.14	-0.12	0.1	0.07	0.09	0.06	0.09	-0.01	-0.01
A0A8L2UIQ9	S-formylglutathione hydrolase OS=Rattus norvegicus OX=10116 GN=Esd PE=1 SV=1	8	0.789	0.974	1.007	0.907	0.913	0.954	0.992	0.998	1.035	1.059	-0.34	-0.04	0.01	-0.14	-0.13	-0.07	-0.01	0	0.05	0.08
M0RAX2	NADH dehydrogenase (ubiquinone) Fe-S protein 6 OS=Rattus norvegicus OX=10116 GN=Ndufs6l1 PE=1 SV=1	6	0.954	0.803	1.083	0.882	0.986	0.743	1.209	0.976	1.112	1.166	-0.07	-0.32	0.12	-0.18	-0.02	-0.43	0.27	-0.03	0.15	0.22
A0A8I6GEM4	Ferrochelatase OS=Rattus norvegicus OX=10116 GN=Fech PE=1 SV=1	12	0.955	1.053	0.961	1.067	1.037	0.887	1.073	1.017	1.016	0.923	-0.07	0.07	-0.06	0.09	0.05	-0.17	0.1	0.03	0.02	-0.12
A0A8I5ZMZ1	Fumarylacetoacetate hydrolase domain containing 2A OS=Rattus norvegicus OX=10116 GN=Fahd2a PE=1 SV=1	11	0.973	0.841	1.09	1.039	1.064	0.862	1.108	1.008	1.026	1.083	-0.04	-0.25	0.12	0.06	0.09	-0.21	0.15	0.01	0.04	0.12
B0BMW0	Ras-related protein Rab-14 OS=Rattus norvegicus OX=10116 GN=Rab14 PE=1 SV=1	10	0.941	1.385	0.948	1.013	1.016	1.305	1.002	0.936	0.955	0.951	-0.09	0.47	-0.08	0.02	0.02	0.38	0	-0.1	-0.07	-0.07
Q3V5X8	Endonuclease OS=Rattus norvegicus OX=10116 GN=Endog PE=1 SV=1	8	1.105	0.851	1.018	1.112	1.045	0.695	1.078	1.029	1.04	0.989	0.14	-0.23	0.03	0.15	0.06	-0.53	0.11	0.04	0.06	-0.02
A0A8L2Q0Z9	Quinoid dihydropteridine reductase OS=Rattus norvegicus OX=10116 GN=Qdpr PE=1 SV=1	11	0.955	1.061	0.987	1.018	1.011	0.968	1.027	1.104	1.054	1.142	-0.07	0.09	-0.02	0.03	0.02	-0.05	0.04	0.14	0.08	0.19
G3V912	Thioredoxin domain containing 13 OS=Rattus norvegicus OX=10116 GN=Tmx4 PE=1 SV=1	8	0.935	1.007	0.989	0.997	1.062	0.81	0.986	0.925	0.957	1.03	-0.1	0.01	-0.02	0	0.09	-0.3	-0.02	-0.11	-0.06	0.04
P63036	DnaJ homolog subfamily A member 1 OS=Rattus norvegicus OX=10116 GN=Dnaja1 PE=1 SV=1	9	0.976	1.222	0.876	0.995	0.985	1.119	0.972	1.01	0.992	0.965	-0.04	0.29	-0.19	-0.01	-0.02	0.16	-0.04	0.01	-0.01	-0.05
A0A8I6GLU8	TAR DNA-binding protein 43 OS=Rattus norvegicus OX=10116 GN=Tardbp PE=1 SV=1	11	0.769	0.798	0.97	0.834	1.01	0.881	1.006	0.975	1.09	1.109	-0.38	-0.33	-0.04	-0.26	0.01	-0.18	0.01	-0.04	0.12	0.15
A0A8I5ZS76	RAB5A, member RAS oncogene family OS=Rattus norvegicus OX=10116 GN=Rab5a PE=1 SV=1	8	0.901	0.997	0.993	0.979	1.031	1.025	0.994	1.097	1.009	1.122	-0.15	0	-0.01	-0.03	0.04	0.04	-0.01	0.13	0.01	0.17
B0BNB9	HtrA serine peptidase 2 OS=Rattus norvegicus OX=10116 GN=Htra2 PE=1 SV=1	9	0.889	0.916	0.94	0.99	1.013	0.971	1.012	1.093	1.017	0.987	-0.17	-0.13	-0.09	-0.01	0.02	-0.04	0.02	0.13	0.02	-0.02
G3V8U9	Proteasome subunit beta type-4 OS=Rattus norvegicus OX=10116 GN=Psmb4 PE=1 SV=3	6	1.005	0.967	1.036	0.961	0.984	0.902	1.025	0.941	1.001	1.003	0.01	-0.05	0.05	-0.06	-0.02	-0.15	0.04	-0.09	0	0
Q5XIG8	Serine-threonine kinase receptor-associated protein OS=Rattus norvegicus OX=10116 GN=Strap PE=1 SV=1	9	0.961	1.177	0.91	1.006	0.97	0.997	0.947	0.995	1.001	0.972	-0.06	0.23	-0.14	0.01	-0.04	0	-0.08	-0.01	0	-0.04
F7F0E5	FLII, actin remodeling protein OS=Rattus norvegicus OX=10116 GN=Flii PE=1 SV=1	14	1.011	1.404	0.873	1.031	0.93	1.251	0.979	1.106	1.011	0.914	0.02	0.49	-0.2	0.04	-0.11	0.32	-0.03	0.15	0.02	-0.13
Q569B4	Ighg protein OS=Rattus norvegicus OX=10116 GN=Ighg PE=1 SV=1	7	1.07	1.723	0.71	1.033	0.921	1.61	0.772	1.15	1.121	0.744	0.1	0.78	-0.49	0.05	-0.12	0.69	-0.37	0.2	0.16	-0.43
Q9EPF2	Cell surface glycoprotein MUC18 OS=Rattus norvegicus OX=10116 GN=Mcam PE=1 SV=2	11	1.239	0.93	1.012	1.125	1.156	1.455	1.078	1.327	1.074	1.035	0.31	-0.1	0.02	0.17	0.21	0.54	0.11	0.41	0.1	0.05
Q6MGB5	(3R)-3-hydroxyacyl-CoA dehydrogenase OS=Rattus norvegicus OX=10116 GN=Hsd17b8 PE=1 SV=1	9	0.851	0.83	0.902	0.956	0.991	0.735	1.04	0.989	1.022	1.025	-0.23	-0.27	-0.15	-0.07	-0.01	-0.45	0.06	-0.02	0.03	0.04
Q925F0	Small muscular protein OS=Rattus norvegicus OX=10116 GN=Smpx PE=1 SV=1	6	1.208	1.5	0.968	1.148	1.097	1.138	0.883	0.946	0.882	0.798	0.27	0.59	-0.05	0.2	0.13	0.19	-0.18	-0.08	-0.18	-0.33
Q5PQM2	Kinesin light chain 4 OS=Rattus norvegicus OX=10116 GN=Klc4 PE=1 SV=1	13	1.014	0.989	1.001	0.946	1.069	1.003	1.012	0.976	1.02	1.004	0.02	-0.02	0	-0.08	0.1	0	0.02	-0.04	0.03	0.01
P80432	Cytochrome c oxidase subunit 7C, mitochondrial OS=Rattus norvegicus OX=10116 GN=Cox7c PE=1 SV=2	4	0.782	0.523	0.883	0.797	0.999	0.425	0.915	0.733	0.883	0.88	-0.35	-0.93	-0.18	-0.33	0	-1.23	-0.13	-0.45	-0.18	-0.18
A0A343F2L7	NADH-ubiquinone oxidoreductase chain 4 OS=Sundamys maxi OX=2021985 GN=ND4 PE=3 SV=1	7	0.492	0.172	0.938	0.815	1.127	0.365	0.774	0.607	0.729	0.93	-1.02	-2.54	-0.09	-0.3	0.17	-1.45	-0.37	-0.72	-0.46	-0.1
F1M471	EPM2A interacting protein 1 OS=Rattus norvegicus OX=10116 GN=Epm2aip1 PE=1 SV=3	8	1.033	1.187	0.979	1.035	1.034	0.93	1.047	1.033	0.975	0.966	0.05	0.25	-0.03	0.05	0.05	-0.1	0.07	0.05	-0.04	-0.05
P19139	Casein kinase II subunit alpha OS=Rattus norvegicus OX=10116 GN=Csnk2a1 PE=1 SV=2	11	1.034	1.089	0.937	1.049	1.032	1	0.988	1.09	1.035	0.928	0.05	0.12	-0.09	0.07	0.05	0	-0.02	0.12	0.05	-0.11
P07632	Superoxide dismutase [Cu-Zn] OS=Rattus norvegicus OX=10116 GN=Sod1 PE=1 SV=2	9	0.882	0.932	0.962	0.964	1.058	0.97	1.164	1.037	1.058	1.095	-0.18	-0.1	-0.06	-0.05	0.08	-0.04	0.22	0.05	0.08	0.13
Q6AY80	Ribosyldihydronicotinamide dehydrogenase [quinone] OS=Rattus norvegicus OX=10116 GN=Nqo2 PE=1 SV=3	8	1.003	0.893	1.026	1.051	1.11	0.818	1.044	1.033	1.032	1.059	0	-0.16	0.04	0.07	0.15	-0.29	0.06	0.05	0.05	0.08
F7FKI8	Heat shock protein family B (small) member 7 OS=Rattus norvegicus OX=10116 GN=Hspb7 PE=3 SV=1	6	1.058	0.967	1.108	0.978	0.981	0.877	0.995	0.968	1.013	1.16	0.08	-0.05	0.15	-0.03	-0.03	-0.19	-0.01	-0.05	0.02	0.21
A0A8I6AGU0	Mitochondrial Rho GTPase OS=Rattus norvegicus OX=10116 GN=Rhot1 PE=1 SV=1	13	0.974	1.036	1.077	0.999	1.092	2.336	1.05	1.184	1.156	0.899	-0.04	0.05	0.11	0	0.13	1.22	0.07	0.24	0.21	-0.15
Q9Z339	Glutathione S-transferase omega-1 OS=Rattus norvegicus OX=10116 GN=Gsto1 PE=1 SV=2	11	0.913	1.022	0.972	0.987	1.022	1.118	1.011	0.992	1.034	1.039	-0.13	0.03	-0.04	-0.02	0.03	0.16	0.02	-0.01	0.05	0.06
F1LML0	asparagine--tRNA ligase OS=Rattus norvegicus OX=10116 GN=Nars1 PE=1 SV=1	12	1.089	1.39	0.812	0.949	1.021	1.244	1.001	1.197	1.001	0.696	0.12	0.48	-0.3	-0.08	0.03	0.32	0	0.26	0	-0.52
A0A0G2K777	Ras homolog family member T1 OS=Rattus norvegicus OX=10116 GN=Rhot1 PE=1 SV=1	13	1.071	1.202	0.929	0.988	0.983	0.879	0.978	1.004	1.03	0.952	0.1	0.27	-0.11	-0.02	-0.02	-0.19	-0.03	0.01	0.04	-0.07
A0A8I6A0L0	Cytochrome c oxidase subunit 5A, mitochondrial OS=Rattus norvegicus OX=10116 GN=LOC100361008 PE=1 SV=1	7	1.066	0.904	0.898	1.064	1.071	0.665	1.09	1.103	1.101	0.875	0.09	-0.14	-0.16	0.09	0.1	-0.59	0.12	0.14	0.14	-0.19
B5DEL8	NADH dehydrogenase [ubiquinone] iron-sulfur protein 5 OS=Rattus norvegicus OX=10116 GN=Ndufs5 PE=1 SV=1	9	0.862	0.559	1.282	0.868	0.897	0.584	0.943	0.882	0.961	1.348	-0.21	-0.84	0.36	-0.2	-0.16	-0.78	-0.08	-0.18	-0.06	0.43
P54921	Alpha-soluble NSF attachment protein OS=Rattus norvegicus OX=10116 GN=Napa PE=1 SV=2	10	1.012	1.076	0.946	0.959	1.071	0.981	1.01	1.023	1.031	1.013	0.02	0.11	-0.08	-0.06	0.1	-0.03	0.01	0.03	0.04	0.02
Q68FW9	COP9 signalosome complex subunit 3 OS=Rattus norvegicus OX=10116 GN=Cops3 PE=1 SV=1	10	0.976	1.207	0.9	1.044	0.981	1.21	1.013	1.116	0.98	0.997	-0.04	0.27	-0.15	0.06	-0.03	0.27	0.02	0.16	-0.03	0
Q66H80	Coatomer subunit delta OS=Rattus norvegicus OX=10116 GN=Arcn1 PE=2 SV=1	13	0.894	1.216	0.949	0.973	1.043	1.238	1.067	1.079	1.065	1.017	-0.16	0.28	-0.08	-0.04	0.06	0.31	0.09	0.11	0.09	0.02
P25809	Creatine kinase U-type, mitochondrial OS=Rattus norvegicus OX=10116 GN=Ckmt1 PE=1 SV=1	7	0.833	1.045	0.888	0.895	0.957	1.298	1	0.988	0.993	0.916	-0.26	0.06	-0.17	-0.16	-0.06	0.38	0	-0.02	-0.01	-0.13
Q498N4	Phosphatidylinositol binding clathrin assembly protein, isoform CRA_c OS=Rattus norvegicus OX=10116 GN=Picalm PE=2 SV=1	12	0.833	0.956	0.941	0.933	1.02	1.104	0.978	0.958	1.026	0.992	-0.26	-0.07	-0.09	-0.1	0.03	0.14	-0.03	-0.06	0.04	-0.01
F1LM66	116 kDa U5 small nuclear ribonucleoprotein component OS=Rattus norvegicus OX=10116 GN=Eftud2 PE=1 SV=3	11	0.926	1.198	0.918	1.01	1.005	1.13	0.974	0.958	0.951	0.997	-0.11	0.26	-0.12	0.01	0.01	0.18	-0.04	-0.06	-0.07	0
F1MAR6	Proline dehydrogenase OS=Rattus norvegicus OX=10116 GN=Prodh PE=1 SV=3	12	0.865	0.916	0.982	0.94	1.085	0.805	1.028	1.088	1.053	1.049	-0.21	-0.13	-0.03	-0.09	0.12	-0.31	0.04	0.12	0.07	0.07
P62845	40S ribosomal protein S15 OS=Rattus norvegicus OX=10116 GN=Rps15 PE=1 SV=2	4	0.922	0.928	1.077	1.016	1.111	0.939	1.055	1.061	1.068	1.064	-0.12	-0.11	0.11	0.02	0.15	-0.09	0.08	0.09	0.09	0.09
A0A8I6GMB4	Hemoglobin alpha, adult chain 1 OS=Rattus norvegicus OX=10116 GN=Hba-a1 PE=1 SV=1	7	1.054	1.355	0.816	1.052	0.913	1.204	0.915	1	0.878	0.737	0.08	0.44	-0.29	0.07	-0.13	0.27	-0.13	0	-0.19	-0.44
D3ZAQ0	FUN14 domain containing 2 OS=Rattus norvegicus OX=10116 GN=Fundc2 PE=1 SV=2	8	0.886	0.707	0.915	0.956	1.079	0.658	1.119	1.026	0.918	1.037	-0.17	-0.5	-0.13	-0.07	0.11	-0.6	0.16	0.04	-0.12	0.05
A0A8I5ZUW5	Pericentriolar material 1 OS=Rattus norvegicus OX=10116 GN=Pcm1 PE=1 SV=1	16	0.956	1.045	0.924	0.983	1.04	0.902	1.05	1.014	1.059	1.042	-0.06	0.06	-0.11	-0.02	0.06	-0.15	0.07	0.02	0.08	0.06
A0A0H2UI20	C-terminal binding protein 1 OS=Rattus norvegicus OX=10116 GN=Ctbp1 PE=1 SV=2	12	0.914	1.069	0.901	1.042	1.044	0.753	1.045	1.001	1.049	1.003	-0.13	0.1	-0.15	0.06	0.06	-0.41	0.06	0	0.07	0
A0A8I5Y0Z3	Polypyrimidine tract-binding protein 1 OS=Rattus norvegicus OX=10116 GN=Ptbp1 PE=1 SV=1	7	0.693	0.995	0.801	0.796	0.927	1.339	0.91	0.887	0.97	0.963	-0.53	-0.01	-0.32	-0.33	-0.11	0.42	-0.14	-0.17	-0.04	-0.05
A0A8I6GMR8	Serine/arginine-rich splicing factor 1 OS=Rattus norvegicus OX=10116 GN=Srsf1 PE=1 SV=1	12	0.913	0.889	0.93	0.883	0.957	0.776	0.921	0.966	0.937	0.963	-0.13	-0.17	-0.1	-0.18	-0.06	-0.37	-0.12	-0.05	-0.09	-0.05
A0A8I6AC00	Sad1 and UNC84 domain containing 2 OS=Rattus norvegicus OX=10116 GN=Sun2 PE=1 SV=1	11	0.913	0.975	0.904	0.976	0.984	1.138	0.986	1.025	0.998	0.902	-0.13	-0.04	-0.15	-0.03	-0.02	0.19	-0.02	0.04	0	-0.15
Q5U2V4	Phospholipase B-like 1 OS=Rattus norvegicus OX=10116 GN=Plbd1 PE=2 SV=1	7	1.054	1	1.062	1.128	1.183	0.928	1.131	1.041	1.147	1.122	0.08	0	0.09	0.17	0.24	-0.11	0.18	0.06	0.2	0.17
A0A8I5Y0C0	Hsp90 co-chaperone Cdc37 OS=Rattus norvegicus OX=10116 GN=Cdc37 PE=1 SV=1	10	0.786	0.828	1.021	0.955	1.084	0.895	1.102	1.014	1.064	1.135	-0.35	-0.27	0.03	-0.07	0.12	-0.16	0.14	0.02	0.09	0.18
A0A8I6A960	Bifunctional phosphoribosylaminoimidazole carboxylase/phosphoribosylaminoimidazole succinocarboxamide synthetase OS=Rattus norvegicus OX=10116 GN=Paics PE=1 SV=1	9	0.967	1.041	1.013	1.05	1.086	1.006	1.058	1.036	1.031	1.04	-0.05	0.06	0.02	0.07	0.12	0.01	0.08	0.05	0.04	0.06
A0A0G2KAN7	glutaminase OS=Rattus norvegicus OX=10116 GN=Gls PE=1 SV=1	12	1.364	1.507	0.957	0.862	1.088	1.934	1.059	1.01	0.983	0.959	0.45	0.59	-0.06	-0.21	0.12	0.95	0.08	0.01	-0.02	-0.06
A0A0G2K3Q6	Fructose-bisphosphate aldolase OS=Rattus norvegicus OX=10116 GN=Aldoc PE=1 SV=1	8	1.193	1.438	0.835	1.214	1.046	1.735	1.048	1.065	0.946	0.902	0.25	0.52	-0.26	0.28	0.06	0.79	0.07	0.09	-0.08	-0.15
Q505J8	Phenylalanine--tRNA ligase alpha subunit OS=Rattus norvegicus OX=10116 GN=Farsa PE=1 SV=1	9	0.869	0.903	1.005	0.953	1.029	0.893	1.064	1.056	1.053	1.05	-0.2	-0.15	0.01	-0.07	0.04	-0.16	0.09	0.08	0.07	0.07
A0A0G2K598	Transforming, acidic coiled-coil containing protein 2 OS=Rattus norvegicus OX=10116 GN=Tacc2 PE=1 SV=2	12	0.95	0.775	0.995	1.01	1.067	0.795	1.047	1.036	1.061	1.048	-0.07	-0.37	-0.01	0.01	0.09	-0.33	0.07	0.05	0.09	0.07
D3ZWD6	Complement C8 alpha chain OS=Rattus norvegicus OX=10116 GN=C8a PE=3 SV=2	10	0.887	1.377	0.813	1.001	0.934	1.685	0.928	1.116	0.993	0.847	-0.17	0.46	-0.3	0	-0.1	0.75	-0.11	0.16	-0.01	-0.24
F1LU71	Methylglutaconyl-CoA hydratase, mitochondrial OS=Rattus norvegicus OX=10116 GN=Auh PE=1 SV=2	12	1.007	0.954	0.989	1.054	1.052	0.821	1.062	1.013	1.032	1.025	0.01	-0.07	-0.02	0.08	0.07	-0.28	0.09	0.02	0.05	0.04
Q3BCU4	Blood vessel epicardial substance OS=Rattus norvegicus OX=10116 GN=Bves PE=1 SV=2	7	0.975	0.827	1.049	0.964	1.071	0.825	1.02	1.057	1.113	1.215	-0.04	-0.27	0.07	-0.05	0.1	-0.28	0.03	0.08	0.15	0.28
A0A0G2JZI0	Scaffold attachment factor B OS=Rattus norvegicus OX=10116 GN=Safb PE=1 SV=2	11	0.918	1.227	0.896	0.916	0.983	0.904	1.019	1.055	1.02	0.979	-0.12	0.3	-0.16	-0.13	-0.02	-0.15	0.03	0.08	0.03	-0.03
Q925Q9	SH3 domain-containing kinase-binding protein 1 OS=Rattus norvegicus OX=10116 GN=Sh3kbp1 PE=1 SV=2	10	1.099	0.855	1.009	1.065	1.09	0.847	1.088	1.054	1.066	1.076	0.14	-0.23	0.01	0.09	0.12	-0.24	0.12	0.08	0.09	0.11
Z4YNF4	Low molecular weight phosphotyrosine protein phosphatase OS=Rattus norvegicus OX=10116 GN=Acp1 PE=1 SV=2	7	0.89	1.091	0.936	0.939	0.95	1.461	1.073	1.064	1.069	0.944	-0.17	0.13	-0.09	-0.09	-0.07	0.55	0.1	0.09	0.1	-0.08
A0A8I6AMK8	Cytoplasmic linker associated protein 2 OS=Rattus norvegicus OX=10116 GN=Clasp2 PE=1 SV=1	13	1.346	0.949	1.034	1.056	1.122	0.905	1.034	1.022	1.009	1.042	0.43	-0.08	0.05	0.08	0.17	-0.14	0.05	0.03	0.01	0.06
Q641Y0	Dolichyl-diphosphooligosaccharide--protein glycosyltransferase 48 kDa subunit OS=Rattus norvegicus OX=10116 GN=Ddost PE=2 SV=1	10	0.938	1.31	0.878	0.994	0.934	1.273	0.984	1.021	0.976	0.949	-0.09	0.39	-0.19	-0.01	-0.1	0.35	-0.02	0.03	-0.03	-0.08
Q68G49	Carboxylic ester hydrolase OS=Rattus norvegicus OX=10116 GN=LOC291863 PE=1 SV=1	11	0.634	1.799	0.68	0.774	0.666	3.515	0.77	1.062	0.779	0.681	-0.66	0.85	-0.56	-0.37	-0.59	1.81	-0.38	0.09	-0.36	-0.56
Q10758	Keratin, type II cytoskeletal 8 OS=Rattus norvegicus OX=10116 GN=Krt8 PE=1 SV=3	13	1.066	2.198	0.601	0.716	1.094	1.079	0.776	1.124	1.124	0.872	0.09	1.14	-0.74	-0.48	0.13	0.11	-0.37	0.17	0.17	-0.2
A0A1Y0DDU1	NADH-ubiquinone oxidoreductase chain 4 OS=Rattus exulans OX=34854 GN=ND4 PE=3 SV=1	8	0.573	0.329	0.934	0.752	1.097	0.289	0.75	0.598	0.813	0.841	-0.8	-1.6	-0.1	-0.41	0.13	-1.79	-0.41	-0.74	-0.3	-0.25
Q63707	Dihydroorotate dehydrogenase (quinone), mitochondrial OS=Rattus norvegicus OX=10116 GN=Dhodh PE=1 SV=1	11	0.952	0.959	0.896	1.004	1.032	1.023	0.987	1.054	1.007	0.99	-0.07	-0.06	-0.16	0.01	0.05	0.03	-0.02	0.08	0.01	-0.01
A0A0G2JZA2	GrpE protein homolog OS=Rattus norvegicus OX=10116 GN=Grpel1 PE=1 SV=1	10	0.893	0.669	1	0.929	1.07	0.674	1.043	0.94	1.026	1.077	-0.16	-0.58	0	-0.11	0.1	-0.57	0.06	-0.09	0.04	0.11
D3ZD23	ATP binding cassette subfamily E member 1 OS=Rattus norvegicus OX=10116 GN=Abce1 PE=4 SV=2	12	1.267	1.036	1.067	1.095	1.039	0.958	1.001	0.996	0.963	0.969	0.34	0.05	0.09	0.13	0.05	-0.06	0	-0.01	-0.05	-0.04
P14141	Carbonic anhydrase 3 OS=Rattus norvegicus OX=10116 GN=Ca3 PE=1 SV=3	9	0.683	1.791	0.632	0.816	0.662	4.519	0.792	0.952	0.723	0.661	-0.55	0.84	-0.66	-0.29	-0.6	2.18	-0.34	-0.07	-0.47	-0.6
C0KUC6	LIM and senescent cell antigen-like-containing domain protein OS=Rattus norvegicus OX=10116 GN=Lims1 PE=1 SV=1	13	0.875	0.925	1.069	0.94	0.981	1.122	1.011	0.988	1.031	1.104	-0.19	-0.11	0.1	-0.09	-0.03	0.17	0.02	-0.02	0.04	0.14
A0A8I5YBV8	Far upstream element binding protein 1 OS=Rattus norvegicus OX=10116 GN=Fubp1 PE=1 SV=1	14	0.936	1.063	0.939	1	1.033	0.964	0.949	0.998	0.988	1.071	-0.1	0.09	-0.09	0	0.05	-0.05	-0.08	0	-0.02	0.1
A0A8I6ARH8	Ribosomal protein L5 OS=Rattus norvegicus OX=10116 GN=Rpl5 PE=1 SV=1	11	1.007	0.962	1.067	1.049	1.002	0.875	1.015	1.057	1.001	1.088	0.01	-0.06	0.09	0.07	0	-0.19	0.02	0.08	0	0.12
D4A414	COX15 homolog, cytochrome c oxidase assembly protein (Yeast), isoform CRA_a OS=Rattus norvegicus OX=10116 GN=Cox15 PE=1 SV=1	8	0.871	0.801	0.982	1.005	1.109	0.742	1.025	1.083	1.029	1.115	-0.2	-0.32	-0.03	0.01	0.15	-0.43	0.04	0.11	0.04	0.16
Q05759	cAMP-dependent protein kinase (Fragment) OS=Rattus norvegicus OX=10116 PE=2 SV=1	11	0.769	0.739	1.069	0.861	1.029	0.748	1.084	0.96	1.117	1.19	-0.38	-0.44	0.1	-0.22	0.04	-0.42	0.12	-0.06	0.16	0.25
D4A8H8	Cytoplasmic FMR1-interacting protein OS=Rattus norvegicus OX=10116 GN=Cyfip1 PE=1 SV=1	15	0.849	1.209	0.901	0.98	1.005	1.22	0.983	1.079	1.076	0.906	-0.24	0.27	-0.15	-0.03	0.01	0.29	-0.02	0.11	0.11	-0.14
A0A8I5ZY98	Bridging integrator 2 OS=Rattus norvegicus OX=10116 GN=Cela1 PE=4 SV=1	8	1.001	2.151	0.876	1.083	0.912	2.851	1.144	1.114	1.124	0.82	0	1.11	-0.19	0.11	-0.13	1.51	0.19	0.16	0.17	-0.29
B5DEH4	UDP-N-acetylglucosamine pyrophosphorylase 1 like 1 OS=Rattus norvegicus OX=10116 GN=Uap1l1 PE=1 SV=1	14	1.101	0.961	0.98	1.004	1.068	1.15	0.991	1.03	1.03	1.005	0.14	-0.06	-0.03	0.01	0.09	0.2	-0.01	0.04	0.04	0.01
B1WC34	Glucosidase 2 subunit beta OS=Rattus norvegicus OX=10116 GN=Prkcsh PE=1 SV=1	11	0.853	0.996	0.886	0.867	0.985	1.043	1.099	0.968	1.058	1.112	-0.23	-0.01	-0.18	-0.21	-0.02	0.06	0.14	-0.05	0.08	0.15
D3ZQM0	Splicing factor 3a, subunit 1 OS=Rattus norvegicus OX=10116 GN=Sf3a1 PE=1 SV=1	14	1.009	1.134	0.985	1.04	1.078	1.087	1.048	1.088	1.027	1.041	0.01	0.18	-0.02	0.06	0.11	0.12	0.07	0.12	0.04	0.06
B0BNM1	NAD(P)H-hydrate epimerase OS=Rattus norvegicus OX=10116 GN=Naxe PE=2 SV=1	9	0.923	0.979	1.038	1.028	0.987	1.048	0.978	0.977	0.947	1.028	-0.12	-0.03	0.05	0.04	-0.02	0.07	-0.03	-0.03	-0.08	0.04
A0A0G2K7Y2	Oxidation resistance 1 OS=Rattus norvegicus OX=10116 GN=Oxr1 PE=1 SV=1	15	1.13	1.336	0.945	1.119	1.003	1.057	0.917	1.088	0.939	0.887	0.18	0.42	-0.08	0.16	0	0.08	-0.12	0.12	-0.09	-0.17
Q3B8Q0	Microtubule-associated protein RP/EB family member 2 OS=Rattus norvegicus OX=10116 GN=Mapre2 PE=1 SV=1	11	0.798	1.211	0.948	0.966	1.031	1.082	1.003	1	1.006	1.023	-0.33	0.28	-0.08	-0.05	0.04	0.11	0.01	0	0.01	0.03
F7FCJ4	KN motif and ankyrin repeat domains 3 OS=Rattus norvegicus OX=10116 GN=Kank3 PE=1 SV=1	11	1.247	0.857	1.021	1.024	1.092	0.727	1.015	0.939	1.018	1.073	0.32	-0.22	0.03	0.03	0.13	-0.46	0.02	-0.09	0.03	0.1
Q641Z9	Succinate dehydrogenase cytochrome b560 subunit, mitochondrial OS=Rattus norvegicus OX=10116 GN=Sdhc PE=1 SV=1	5	0.686	0.62	1.024	0.8	0.933	0.752	0.944	0.796	0.962	1.055	-0.54	-0.69	0.03	-0.32	-0.1	-0.41	-0.08	-0.33	-0.06	0.08
A0A8I5ZTR0	Vesicle-associated membrane protein 3 OS=Rattus norvegicus OX=10116 GN=Vamp3 PE=1 SV=1	4	0.93	1.377	0.926	1.109	1.069	0.968	0.983	0.998	0.975	1.034	-0.1	0.46	-0.11	0.15	0.1	-0.05	-0.02	0	-0.04	0.05
A0A0H2UHF6	PRA1 family protein OS=Rattus norvegicus OX=10116 GN=Arl6ip5 PE=1 SV=1	6	1.012	1.148	1	1.076	1.003	0.798	1.036	0.974	1.009	1.011	0.02	0.2	0	0.11	0	-0.33	0.05	-0.04	0.01	0.02
A0A8I5ZT81	G protein subunit alpha o1 OS=Rattus norvegicus OX=10116 GN=Gnao1 PE=3 SV=1	8	0.818	1.748	0.93	0.862	0.872	1.75	1.001	0.868	0.948	0.937	-0.29	0.81	-0.11	-0.21	-0.2	0.81	0	-0.2	-0.08	-0.09
A0A8I6A2Y2	Serine/arginine repetitive matrix 2 OS=Rattus norvegicus OX=10116 GN=Srrm2 PE=1 SV=1	16	0.772	0.757	0.868	0.956	1.025	0.76	1	0.873	0.874	0.86	-0.37	-0.4	-0.2	-0.06	0.04	-0.4	0	-0.2	-0.19	-0.22
A0A096MJ75	GMP synthase (glutamine-hydrolyzing) OS=Rattus norvegicus OX=10116 GN=Gmps PE=1 SV=2	14	0.904	0.929	1.02	1.01	1.011	1.167	1.011	1.041	0.971	0.981	-0.15	-0.11	0.03	0.01	0.02	0.22	0.02	0.06	-0.04	-0.03
Q5XIP0	DnaJ (Hsp40) homolog, subfamily B, member 4 OS=Rattus norvegicus OX=10116 GN=Dnajb4 PE=1 SV=1	15	1.26	2.031	0.881	1.037	0.885	0.863	0.922	0.954	0.885	0.818	0.33	1.02	-0.18	0.05	-0.18	-0.21	-0.12	-0.07	-0.18	-0.29
Q4AEF8	Coatomer subunit gamma-1 OS=Rattus norvegicus OX=10116 GN=Copg1 PE=2 SV=1	10	0.776	1.018	0.954	0.882	1.052	1.285	1.084	1.103	1.102	1.484	-0.37	0.03	-0.07	-0.18	0.07	0.36	0.12	0.14	0.14	0.57
Q7TT47	Paraplegin OS=Rattus norvegicus OX=10116 GN=Spg7 PE=2 SV=2	10	1.066	1.013	0.985	1.048	1.044	0.85	1.07	1.06	1.057	1.024	0.09	0.02	-0.02	0.07	0.06	-0.23	0.1	0.08	0.08	0.03
A0A8I6AMY8	Eukaryotic translation initiation factor 4 gamma, 3 OS=Rattus norvegicus OX=10116 GN=Eif4g3 PE=1 SV=1	15	1.445	1.236	0.907	1.061	0.967	1.176	0.946	0.988	0.921	0.835	0.53	0.31	-0.14	0.09	-0.05	0.23	-0.08	-0.02	-0.12	-0.26
A0A0G2K1M2	Discs large MAGUK scaffold protein 1 OS=Rattus norvegicus OX=10116 GN=Dlg1 PE=1 SV=2	16	1.095	1.073	0.916	1.073	1.105	0.987	1.07	1.087	1.08	1.004	0.13	0.1	-0.13	0.1	0.14	-0.02	0.1	0.12	0.11	0.01
D4A565	NADH dehydrogenase [ubiquinone] 1 beta subcomplex subunit 5, mitochondrial OS=Rattus norvegicus OX=10116 GN=Ndufb5 PE=3 SV=2	8	1.013	0.654	1.055	0.979	1.082	0.577	1.08	0.969	1.001	1.039	0.02	-0.61	0.08	-0.03	0.11	-0.79	0.11	-0.05	0	0.06
A0A8L2QX46	NADH dehydrogenase [ubiquinone] 1 alpha subcomplex subunit 11 OS=Rattus norvegicus OX=10116 GN=Ndufa11 PE=1 SV=1	5	0.68	0.54	1.183	0.804	0.942	0.453	1.118	0.839	1.081	1.363	-0.56	-0.89	0.24	-0.31	-0.09	-1.14	0.16	-0.25	0.11	0.45
P24368	Peptidyl-prolyl cis-trans isomerase B OS=Rattus norvegicus OX=10116 GN=Ppib PE=1 SV=3	9	0.948	1.188	0.977	1.016	0.965	1.177	1.014	1.003	1.028	0.993	-0.08	0.25	-0.03	0.02	-0.05	0.23	0.02	0	0.04	-0.01
A0A8I5XWT5	Sirtuin 3 OS=Rattus norvegicus OX=10116 GN=Sirt3 PE=1 SV=1	9	1.039	0.97	0.947	1.067	1.031	0.816	1.029	1.032	0.982	0.909	0.05	-0.04	-0.08	0.09	0.04	-0.29	0.04	0.05	-0.03	-0.14
F1LPQ3	alpha-mannosidase OS=Rattus norvegicus OX=10116 GN=Man2c1 PE=1 SV=3	13	0.99	1.099	0.869	1.012	0.994	1.013	0.997	1.088	0.985	0.912	-0.01	0.14	-0.2	0.02	-0.01	0.02	0	0.12	-0.02	-0.13
Q5XIA8	Growth hormone-inducible transmembrane protein OS=Rattus norvegicus OX=10116 GN=Ghitm PE=2 SV=1	8	0.923	0.898	0.97	0.964	0.975	0.929	0.994	0.982	1.034	0.977	-0.12	-0.16	-0.04	-0.05	-0.04	-0.11	-0.01	-0.03	0.05	-0.03
A0A8I5ZQJ6	Apoptosis inhibitor 5 OS=Rattus norvegicus OX=10116 GN=Api5 PE=1 SV=1	13	0.967	1.143	0.907	1.004	1.06	1.073	0.963	1.06	0.993	1.042	-0.05	0.19	-0.14	0.01	0.08	0.1	-0.05	0.08	-0.01	0.06
A0A8J8XXQ6	Heterogeneous nuclear ribonucleoprotein A/B OS=Rattus norvegicus OX=10116 GN=Hnrnpab PE=1 SV=1	10	0.784	0.846	0.972	0.864	1.011	1.034	1.02	0.912	1.02	1.102	-0.35	-0.24	-0.04	-0.21	0.02	0.05	0.03	-0.13	0.03	0.14
Q6AYD5	G1 to S phase transition 1 OS=Rattus norvegicus OX=10116 GN=Gspt1 PE=1 SV=1	11	0.902	1.07	0.937	1.004	0.995	1.049	1.045	1.027	0.975	0.972	-0.15	0.1	-0.09	0.01	-0.01	0.07	0.06	0.04	-0.04	-0.04
A0A0G2JT06	G protein pathway suppressor 1 OS=Rattus norvegicus OX=10116 GN=Gps1 PE=1 SV=1	6	1.008	1.32	0.965	1.045	0.94	1.146	1.031	1.004	1.034	1.024	0.01	0.4	-0.05	0.06	-0.09	0.2	0.04	0.01	0.05	0.03
P40307	Proteasome subunit beta type-2 OS=Rattus norvegicus OX=10116 GN=Psmb2 PE=1 SV=1	9	0.947	1.082	1.012	0.997	0.98	0.984	1.028	0.967	1.023	1.021	-0.08	0.11	0.02	0	-0.03	-0.02	0.04	-0.05	0.03	0.03
A0A8I6A6H9	Acyl-CoA thioesterase 3 OS=Rattus norvegicus OX=10116 GN=Acot3 PE=1 SV=1	11	0.942	1.056	1.043	1.142	1.119	1.221	1.068	1.213	1.117	1.092	-0.09	0.08	0.06	0.19	0.16	0.29	0.09	0.28	0.16	0.13
Q4QQW3	Hydroxyacid-oxoacid transhydrogenase, mitochondrial OS=Rattus norvegicus OX=10116 GN=Adhfe1 PE=1 SV=1	8	1.1	0.883	0.998	1.1	1.138	0.901	0.998	1.04	0.995	0.953	0.14	-0.18	0	0.14	0.19	-0.15	0	0.06	-0.01	-0.07
P18422	Proteasome subunit alpha type-3 OS=Rattus norvegicus OX=10116 GN=Psma3 PE=1 SV=3	13	0.821	1.202	0.85	0.959	0.942	1.093	1	1.006	1.016	0.965	-0.28	0.27	-0.23	-0.06	-0.09	0.13	0	0.01	0.02	-0.05
A0A8I5Y5Z9	RCG21206, isoform CRA_b OS=Rattus norvegicus OX=10116 GN=Tmed2 PE=1 SV=1	6	0.81	0.941	0.882	0.824	0.898	0.915	0.908	0.867	0.965	0.974	-0.3	-0.09	-0.18	-0.28	-0.15	-0.13	-0.14	-0.21	-0.05	-0.04
A0A8I5ZZD3	5-oxoprolinase (ATP-hydrolysing) OS=Rattus norvegicus OX=10116 GN=Oplah PE=1 SV=1	13	0.971	1.054	0.94	1.037	1.023	0.958	1.048	1.108	1.038	0.929	-0.04	0.08	-0.09	0.05	0.03	-0.06	0.07	0.15	0.05	-0.11
Q8R2E7	FAS-associated death domain protein OS=Rattus norvegicus OX=10116 GN=Fadd PE=1 SV=1	7	1.011	0.875	0.953	0.996	1.101	0.916	0.987	0.987	1.016	1.083	0.02	-0.19	-0.07	-0.01	0.14	-0.13	-0.02	-0.02	0.02	0.11
F8WFR6	Glycogenin 1 OS=Rattus norvegicus OX=10116 GN=Gyg1 PE=1 SV=2	9	0.919	1.108	0.93	0.952	0.955	0.988	0.999	0.941	0.944	0.978	-0.12	0.15	-0.11	-0.07	-0.07	-0.02	0	-0.09	-0.08	-0.03
E7C9E3	NADH-ubiquinone oxidoreductase chain 5 OS=Rattus leucopus OX=10115 GN=ND5 PE=3 SV=1	6	1.055	0.827	1.254	1.111	1.107	0.706	1.1	1.025	1.046	0.96	0.08	-0.27	0.33	0.15	0.15	-0.5	0.14	0.04	0.07	-0.06
Q6AYU5	Poly(RC) binding protein 2 OS=Rattus norvegicus OX=10116 GN=Pcbp2 PE=1 SV=1	9	0.766	0.909	0.833	0.868	0.941	0.893	0.906	0.96	0.895	1.036	-0.38	-0.14	-0.26	-0.2	-0.09	-0.16	-0.14	-0.06	-0.16	0.05
A0A8L2Q8D2	Lipoprotein lipase OS=Rattus norvegicus OX=10116 GN=Lpl PE=3 SV=1	9	0.918	0.845	0.985	0.99	1.067	0.791	1.02	0.994	1.075	1.07	-0.12	-0.24	-0.02	-0.01	0.09	-0.34	0.03	-0.01	0.1	0.1
A0A8I5ZP07	G protein subunit beta 2 OS=Rattus norvegicus OX=10116 GN=Gnb2 PE=1 SV=1	9	0.963	1.349	0.896	0.917	0.827	1.31	0.876	0.964	0.942	0.93	-0.06	0.43	-0.16	-0.12	-0.27	0.39	-0.19	-0.05	-0.09	-0.1
P55053	Fatty acid-binding protein 5 OS=Rattus norvegicus OX=10116 GN=Fabp5 PE=1 SV=3	8	0.903	1.199	0.902	1.045	0.895	1.635	0.961	1.029	0.961	1.04	-0.15	0.26	-0.15	0.06	-0.16	0.71	-0.06	0.04	-0.06	0.06
A0A8I6A4U7	Capping actin protein of muscle Z-line subunit alpha 2 OS=Rattus norvegicus OX=10116 GN=Capza2 PE=1 SV=1	9	1.622	1.716	1.032	1.19	1.076	1.504	1.034	1.018	0.969	0.901	0.7	0.78	0.05	0.25	0.11	0.59	0.05	0.03	-0.05	-0.15
Q80ZF4	non-specific serine/threonine protein kinase OS=Rattus norvegicus OX=10116 GN=Mapkapk2 PE=1 SV=1	11	1.112	1.152	0.908	1.087	1.016	1.029	1.012	1.001	1.008	0.926	0.15	0.2	-0.14	0.12	0.02	0.04	0.02	0	0.01	-0.11
A0A8I5Y290	28S ribosomal protein S31, mitochondrial OS=Rattus norvegicus OX=10116 GN=Mrps31 PE=1 SV=1	11	0.926	0.946	0.965	1.035	1.118	0.806	1.045	1.151	1.02	1.048	-0.11	-0.08	-0.05	0.05	0.16	-0.31	0.06	0.2	0.03	0.07
A0A0G2K2T6	Interleukin enhancer binding factor 3 OS=Rattus norvegicus OX=10116 GN=Ilf3 PE=1 SV=2	8	0.906	0.952	0.954	1	1.054	1.039	1.057	1.082	1.049	1.035	-0.14	-0.07	-0.07	0	0.08	0.05	0.08	0.11	0.07	0.05
A0A8I5YC36	RAN binding protein 2 OS=Rattus norvegicus OX=10116 GN=Ranbp2 PE=1 SV=1	14	1.152	1.401	0.857	1.139	0.922	1.301	1	1.168	0.963	0.844	0.2	0.49	-0.22	0.19	-0.12	0.38	0	0.22	-0.05	-0.24
A0A8L2URI1	Mitochondrial fission 1 protein OS=Rattus norvegicus OX=10116 GN=Fis1 PE=1 SV=1	8	0.945	0.948	0.981	0.952	0.98	0.873	0.966	0.925	0.958	1.013	-0.08	-0.08	-0.03	-0.07	-0.03	-0.2	-0.05	-0.11	-0.06	0.02
Q8CG45	Aflatoxin B1 aldehyde reductase member 2 OS=Rattus norvegicus OX=10116 GN=Akr7a2 PE=1 SV=2	8	0.857	0.957	0.96	0.984	1.012	1.07	1.026	1.039	1.009	1.014	-0.22	-0.06	-0.06	-0.02	0.02	0.1	0.04	0.06	0.01	0.02
A0A8L2QWS2	VPS26 retromer complex component A OS=Rattus norvegicus OX=10116 GN=Vps26a PE=1 SV=1	12	0.879	1.036	0.962	0.966	0.994	1.191	1.049	1.048	1.032	1.026	-0.19	0.05	-0.06	-0.05	-0.01	0.25	0.07	0.07	0.05	0.04
P62982	Ubiquitin-40S ribosomal protein S27a OS=Rattus norvegicus OX=10116 GN=Rps27a PE=1 SV=2	8	1.087	1.202	1.002	1.087	1.04	1.553	0.871	1.021	0.929	0.831	0.12	0.27	0	0.12	0.06	0.64	-0.2	0.03	-0.11	-0.27
Q5PQW8	Guanylate binding protein 2 OS=Rattus norvegicus OX=10116 GN=Gbp2 PE=1 SV=1	10	0.953	0.853	0.944	0.963	1.032	0.911	1.12	0.953	1.186	1.063	-0.07	-0.23	-0.08	-0.05	0.05	-0.13	0.16	-0.07	0.25	0.09
D3ZNZ9	Histone H2B OS=Rattus norvegicus OX=10116 GN=Hist3h2ba PE=3 SV=1	5	0.92	0.75	1.184	1.072	0.931	0.951	1.016	1.015	0.857	0.997	-0.12	-0.41	0.24	0.1	-0.1	-0.07	0.02	0.02	-0.22	0
Q68FU7	Ubiquinone biosynthesis monooxygenase COQ6, mitochondrial OS=Rattus norvegicus OX=10116 GN=Coq6 PE=2 SV=1	8	0.938	0.982	0.973	1.021	1.05	0.89	1.042	1.087	1.041	1.056	-0.09	-0.03	-0.04	0.03	0.07	-0.17	0.06	0.12	0.06	0.08
D3ZLM5	NHL repeat containing 2 OS=Rattus norvegicus OX=10116 GN=Nhlrc2 PE=1 SV=1	9	0.985	1.054	0.921	1.007	0.997	1.138	1.004	1.023	1.002	0.949	-0.02	0.08	-0.12	0.01	0	0.19	0.01	0.03	0	-0.08
B0BN85	Protein SGT1 homolog OS=Rattus norvegicus OX=10116 GN=Sugt1 PE=2 SV=1	10	0.985	1.135	0.906	0.951	0.948	0.946	0.977	0.955	0.973	0.988	-0.02	0.18	-0.14	-0.07	-0.08	-0.08	-0.03	-0.07	-0.04	-0.02
P15791	Calcium/calmodulin-dependent protein kinase type II subunit delta OS=Rattus norvegicus OX=10116 GN=Camk2d PE=1 SV=1	10	0.892	1.003	0.991	0.895	1.014	0.88	1.062	0.977	0.992	1.044	-0.17	0	-0.01	-0.16	0.02	-0.18	0.09	-0.03	-0.01	0.06
A0A0G2JZG7	serine--tRNA ligase OS=Rattus norvegicus OX=10116 GN=Sars1 PE=1 SV=1	12	0.919	1.146	0.91	1.015	1.031	1.107	0.983	1	0.966	0.967	-0.12	0.2	-0.14	0.02	0.04	0.15	-0.03	0	-0.05	-0.05
A0A8I6A0A3	Glutathione reductase OS=Rattus norvegicus OX=10116 GN=Gsr PE=1 SV=1	8	1.084	1.211	0.918	1.084	1.006	1.072	0.976	1.011	0.978	0.936	0.12	0.28	-0.12	0.12	0.01	0.1	-0.03	0.02	-0.03	-0.1
Q4FZT0	Stomatin-like protein 2, mitochondrial OS=Rattus norvegicus OX=10116 GN=Stoml2 PE=1 SV=1	8	1.049	0.953	1.081	1.068	1.108	0.987	1.141	1.088	1.12	1.131	0.07	-0.07	0.11	0.09	0.15	-0.02	0.19	0.12	0.16	0.18
Q5RKI9	Ribosome-recycling factor, mitochondrial OS=Rattus norvegicus OX=10116 GN=Mrrf PE=2 SV=1	6	1.061	1.044	0.977	1.068	1.164	0.89	1.016	1.1	1.048	1.017	0.09	0.06	-0.03	0.1	0.22	-0.17	0.02	0.14	0.07	0.02
P30349	Leukotriene A-4 hydrolase OS=Rattus norvegicus OX=10116 GN=Lta4h PE=1 SV=3	14	1.034	1.407	0.929	1.094	1.041	1.327	1.002	1.133	1.017	1.01	0.05	0.49	-0.11	0.13	0.06	0.41	0	0.18	0.02	0.01
D3ZTW7	ATP synthase mitochondrial F1 complex assembly factor 2 OS=Rattus norvegicus OX=10116 GN=Atpaf2 PE=1 SV=1	8	0.966	1.07	0.998	0.987	1.095	0.989	1.031	1.053	1.048	1.073	-0.05	0.1	0	-0.02	0.13	-0.02	0.04	0.07	0.07	0.1
A0A8I5ZKJ3	NADH dehydrogenase [ubiquinone] 1 alpha subcomplex subunit 2 OS=Rattus norvegicus OX=10116 GN=Ndufa2 PE=1 SV=1	7	1.031	0.729	1.07	1.009	1.071	0.616	1.089	1.019	1.031	1.081	0.04	-0.46	0.1	0.01	0.1	-0.7	0.12	0.03	0.04	0.11
A0A8L2Q6A6	Paraoxonase OS=Rattus norvegicus OX=10116 GN=Pon1 PE=1 SV=1	8	0.824	1.368	0.799	0.957	0.847	2.169	1.053	1.169	1.021	0.77	-0.28	0.45	-0.32	-0.06	-0.24	1.12	0.08	0.23	0.03	-0.38
F1M978	Inositol-1-monophosphatase OS=Rattus norvegicus OX=10116 GN=Impa1 PE=1 SV=2	7	0.995	1.535	0.874	1.029	0.915	1.323	0.964	1.047	0.928	0.833	-0.01	0.62	-0.19	0.04	-0.13	0.4	-0.05	0.07	-0.11	-0.26
A0A8L2QBL5	Transthyretin OS=Rattus norvegicus OX=10116 GN=Ttr PE=1 SV=1	7	0.928	1.44	0.712	0.947	0.823	2.471	0.917	1.143	1.011	0.702	-0.11	0.53	-0.49	-0.08	-0.28	1.3	-0.13	0.19	0.02	-0.51
Q5RKJ9	RAB10, member RAS oncogene family OS=Rattus norvegicus OX=10116 GN=Rab10 PE=1 SV=1	10	0.859	1.146	0.899	0.987	0.985	1.061	1.038	1.034	0.978	0.962	-0.22	0.2	-0.15	-0.02	-0.02	0.09	0.05	0.05	-0.03	-0.06
A0A8I5Y4W3	RAB12, member RAS oncogene family OS=Rattus norvegicus OX=10116 GN=Rab12 PE=1 SV=1	13	0.828	0.84	1.131	0.919	0.978	0.998	0.996	1.03	1.069	1.195	-0.27	-0.25	0.18	-0.12	-0.03	0	-0.01	0.04	0.1	0.26
M0R959	Metabolism of cobalamin associated B OS=Rattus norvegicus OX=10116 GN=Mmab PE=1 SV=1	7	0.861	0.821	1.066	0.974	1.117	0.792	1.05	0.982	1.051	1.076	-0.22	-0.29	0.09	-0.04	0.16	-0.34	0.07	-0.03	0.07	0.11
Q9ESN0	Protein Niban 1 OS=Rattus norvegicus OX=10116 GN=Niban1 PE=1 SV=2	13	1.141	1.257	0.901	0.994	1.01	1.644	0.923	1.088	0.972	0.903	0.19	0.33	-0.15	-0.01	0.01	0.72	-0.12	0.12	-0.04	-0.15
D3ZA93	Acyl-CoA thioesterase 13 OS=Rattus norvegicus OX=10116 GN=Acot13 PE=1 SV=1	7	0.89	0.981	0.956	1.041	1.011	0.798	1.007	0.999	1.005	0.998	-0.17	-0.03	-0.06	0.06	0.02	-0.33	0.01	0	0.01	0
A0A8I5Y7K9	Metadherin OS=Rattus norvegicus OX=10116 GN=Mtdh PE=1 SV=1	11	0.972	1.268	0.945	1.002	1.017	0.972	1.007	1.06	1.025	0.903	-0.04	0.34	-0.08	0	0.02	-0.04	0.01	0.08	0.04	-0.15
A0A0G2K4X8	S-phase kinase-associated protein 1 OS=Rattus norvegicus OX=10116 GN=Skp1 PE=1 SV=1	9	0.515	0.567	1.015	0.721	0.832	1.501	1.104	0.933	1.102	1.549	-0.96	-0.82	0.02	-0.47	-0.27	0.59	0.14	-0.1	0.14	0.63
F1M9C8	Kinesin family member 1C OS=Rattus norvegicus OX=10116 GN=Kif1c PE=1 SV=2	15	1.003	1.082	0.94	0.988	1.052	0.935	1.031	1.064	1.028	0.984	0	0.11	-0.09	-0.02	0.07	-0.1	0.04	0.09	0.04	-0.02
B3FBM7	Elongation factor 1-alpha (Fragment) OS=Cyrtopogon rattus OX=468714 GN=EF-1alpha PE=3 SV=1	7	0.597	0.623	0.805	0.765	0.985	0.679	0.935	0.769	0.835	0.989	-0.74	-0.68	-0.31	-0.39	-0.02	-0.56	-0.1	-0.38	-0.26	-0.02
Q496Z1	BICD cargo adaptor 2 OS=Rattus norvegicus OX=10116 GN=Bicd2 PE=1 SV=1	13	0.966	1.134	0.878	1.034	1.122	1.03	1.059	1.226	1.09	1.107	-0.05	0.18	-0.19	0.05	0.17	0.04	0.08	0.29	0.12	0.15
G3V811	protein-glutamine gamma-glutamyltransferase OS=Rattus norvegicus OX=10116 GN=F13a1 PE=1 SV=1	11	0.841	1.458	0.826	0.969	0.923	1.865	0.962	1.103	0.982	0.793	-0.25	0.54	-0.28	-0.05	-0.12	0.9	-0.06	0.14	-0.03	-0.34
B5DEH2	Erlin-2 OS=Rattus norvegicus OX=10116 GN=Erlin2 PE=1 SV=1	11	0.905	0.807	1.009	0.893	0.985	0.832	1.077	1.067	1.064	1.106	-0.14	-0.31	0.01	-0.16	-0.02	-0.27	0.11	0.09	0.09	0.15
A0A8L2Q9I9	Capping actin protein, gelsolin like OS=Rattus norvegicus OX=10116 GN=Capg PE=1 SV=1	8	1.299	1.259	1.064	1.213	1.173	1.011	0.984	1.14	1.026	0.887	0.38	0.33	0.09	0.28	0.23	0.02	-0.02	0.19	0.04	-0.17
B2RYJ7	ARP1 actin-related protein 1 homolog B (Yeast) OS=Rattus norvegicus OX=10116 GN=Actr1b PE=2 SV=1	8	0.956	1.026	0.976	0.903	0.95	0.9	1.084	1.072	1.029	1.177	-0.06	0.04	-0.03	-0.15	-0.07	-0.15	0.12	0.1	0.04	0.23
F7FJT3	UV excision repair protein RAD23 OS=Rattus norvegicus OX=10116 GN=Rad23a PE=1 SV=1	9	0.868	1.089	0.902	0.957	0.94	1.528	1.08	1.144	1.107	1.239	-0.2	0.12	-0.15	-0.06	-0.09	0.61	0.11	0.19	0.15	0.31
Q9NQR8	NADH dehydrogenase [ubiquinone] 1 alpha subcomplex assembly factor 4 OS=Rattus norvegicus OX=10116 GN=Ndufaf4 PE=1 SV=1	10	1.042	0.866	0.997	1.04	1.098	0.756	1	0.994	1.004	1.01	0.06	-0.21	0	0.06	0.13	-0.4	0	-0.01	0.01	0.02
A0A0G2K0A9	creatine kinase OS=Rattus norvegicus OX=10116 GN=Ckmt1 PE=1 SV=1	6	2.043	1.424	1.076	1.337	1.079	1.02	1.078	1.052	1.043	0.931	1.03	0.51	0.11	0.42	0.11	0.03	0.11	0.07	0.06	-0.1
Q80ZA3	Alpha-2 antiplasmin OS=Rattus norvegicus OX=10116 GN=Serpinf1 PE=2 SV=1	7	0.994	1.379	0.786	1.021	0.995	1.303	0.909	1	0.975	0.852	-0.01	0.46	-0.35	0.03	-0.01	0.38	-0.14	0	-0.04	-0.23
A0A8I6A1E1	PDGFA associated protein 1 OS=Rattus norvegicus OX=10116 GN=Pdap1 PE=1 SV=1	10	0.904	0.99	0.926	0.956	1.05	0.992	1.043	0.961	1.028	1.094	-0.15	-0.01	-0.11	-0.06	0.07	-0.01	0.06	-0.06	0.04	0.13
A0A8I6AD02	Glyceraldehyde 3-phosphate dehydrogenase NAD(P) binding domain-containing protein OS=Rattus norvegicus OX=10116 GN=ENSRNOG00000069655 PE=3 SV=1	6	0.668	0.804	1.154	0.779	0.841	0.864	0.892	0.8	0.941	1.084	-0.58	-0.32	0.21	-0.36	-0.25	-0.21	-0.16	-0.32	-0.09	0.12
A0A0U1RS21	Rac family small GTPase 1 OS=Rattus norvegicus OX=10116 GN=Rac1 PE=1 SV=2	9	0.994	1.167	1.003	1.044	1.02	1.083	1.055	1.043	1.031	0.942	-0.01	0.22	0	0.06	0.03	0.12	0.08	0.06	0.04	-0.09
Q4FZU0	Acid phosphatase 6, lysophosphatidic OS=Rattus norvegicus OX=10116 GN=Acp6 PE=1 SV=1	7	1.075	1.15	0.994	1.102	1.001	0.999	1.017	1.009	0.989	0.948	0.1	0.2	-0.01	0.14	0	0	0.02	0.01	-0.02	-0.08
A0A8I6A252	Mitogen-activated protein kinase OS=Rattus norvegicus OX=10116 GN=Mapk1 PE=1 SV=1	10	1.082	1.17	0.973	1.06	0.985	1.084	1.014	1.003	0.996	0.977	0.11	0.23	-0.04	0.08	-0.02	0.12	0.02	0	-0.01	-0.03
B2GV24	E3 UFM1-protein ligase 1 OS=Rattus norvegicus OX=10116 GN=Ufl1 PE=1 SV=1	10	0.934	1.201	0.931	1.025	1.136	0.964	1.096	1.073	1.114	0.892	-0.1	0.26	-0.1	0.04	0.18	-0.05	0.13	0.1	0.16	-0.17
D3ZJR7	Desmocollin 2 OS=Rattus norvegicus OX=10116 GN=Dsc2 PE=1 SV=4	11	1.117	1.085	1.08	1.033	1.055	0.924	1.083	1.045	1.073	1.006	0.16	0.12	0.11	0.05	0.08	-0.11	0.11	0.06	0.1	0.01
Q9EPX0	Heat shock protein beta-8 OS=Rattus norvegicus OX=10116 GN=Hspb8 PE=1 SV=1	8	1.036	0.94	1.001	0.982	1.048	0.736	1.009	0.98	1.014	1.062	0.05	-0.09	0	-0.03	0.07	-0.44	0.01	-0.03	0.02	0.09
A0A7U3NYV1	Actin (Fragment) OS=Cryptosporidium andersoni OX=117008 PE=3 SV=1	10	1.742	1.091	0.937	1.029	1.097	0.934	0.914	0.964	0.941	0.999	0.8	0.13	-0.09	0.04	0.13	-0.1	-0.13	-0.05	-0.09	0
A0A8I6A568	Gephyrin OS=Rattus norvegicus OX=10116 GN=Gphn PE=1 SV=1	12	1.122	1.304	0.843	1.089	1.007	1.034	0.955	0.973	0.944	0.817	0.17	0.38	-0.25	0.12	0.01	0.05	-0.07	-0.04	-0.08	-0.29
Q71S46	ATP synthase F(0) complex subunit C3, mitochondrial OS=Rattus norvegicus OX=10116 GN=Atp5mc3 PE=1 SV=1	3	0.839	0.682	0.84	0.947	1.094	0.471	0.903	0.939	0.882	0.799	-0.25	-0.55	-0.25	-0.08	0.13	-1.09	-0.15	-0.09	-0.18	-0.32
B5DF91	ELAV-like protein 1 OS=Rattus norvegicus OX=10116 GN=Elavl1 PE=1 SV=1	9	0.977	1.012	0.974	0.985	1.064	1.028	0.978	1.109	1.077	1.144	-0.03	0.02	-0.04	-0.02	0.09	0.04	-0.03	0.15	0.11	0.19
A0A8I6GFS9	ATPase H+ transporting V1 subunit E1 OS=Rattus norvegicus OX=10116 GN=Atp6v1e1 PE=1 SV=1	9	0.905	1.206	0.935	0.953	1.001	0.935	0.97	0.982	1.014	0.973	-0.14	0.27	-0.1	-0.07	0	-0.1	-0.04	-0.03	0.02	-0.04
A0A0G2JSV3	ribose-phosphate diphosphokinase OS=Rattus norvegicus OX=10116 GN=LOC314140 PE=1 SV=1	9	0.672	1.096	0.913	0.918	0.857	1.339	0.928	1.156	1.112	0.858	-0.57	0.13	-0.13	-0.12	-0.22	0.42	-0.11	0.21	0.15	-0.22
P21588	5'-nucleotidase OS=Rattus norvegicus OX=10116 GN=Nt5e PE=1 SV=1	8	0.896	1.316	0.952	0.956	0.992	1.012	1.006	1.025	0.983	1.022	-0.16	0.4	-0.07	-0.06	-0.01	0.02	0.01	0.04	-0.02	0.03
P12369	cAMP-dependent protein kinase type II-beta regulatory subunit OS=Rattus norvegicus OX=10116 GN=Prkar2b PE=1 SV=3	8	1.207	1.267	1.151	1.161	0.924	2.864	1.198	1.002	1.036	1.208	0.27	0.34	0.2	0.22	-0.11	1.52	0.26	0	0.05	0.27
A0A8I6AAB5	A-kinase anchoring protein 2 OS=Rattus norvegicus OX=10116 GN=Akap2 PE=1 SV=1	13	0.969	1.044	0.972	0.957	1.036	1.05	1.025	1.013	1.027	1.056	-0.05	0.06	-0.04	-0.06	0.05	0.07	0.04	0.02	0.04	0.08
A0A343F2X1	NADH-ubiquinone oxidoreductase chain 4 OS=Leopoldamys edwardsi OX=83756 GN=ND4 PE=3 SV=1	6	0.605	0.565	0.925	0.82	1.204	0.642	0.845	0.827	0.844	0.9	-0.72	-0.82	-0.11	-0.29	0.27	-0.64	-0.24	-0.27	-0.24	-0.15
A0A8I5ZXA1	Myosin light chain 12A OS=Rattus norvegicus OX=10116 GN=Myl12a PE=4 SV=1	9	1.265	1.357	0.791	0.884	0.85	2.28	0.75	0.819	0.835	0.799	0.34	0.44	-0.34	-0.18	-0.23	1.19	-0.41	-0.29	-0.26	-0.32
D3ZSA9	Nodal modulator 1 OS=Rattus norvegicus OX=10116 GN=Nomo1 PE=4 SV=2	12	1.033	1.23	0.953	1.068	1.047	1.091	1.032	1.03	1.02	0.978	0.05	0.3	-0.07	0.1	0.07	0.13	0.05	0.04	0.03	-0.03
Q6AYR8	Secernin-2 OS=Rattus norvegicus OX=10116 GN=Scrn2 PE=2 SV=1	7	1.054	1.002	0.99	1.092	1.209	1.007	1.09	1.117	1.073	1.015	0.08	0	-0.01	0.13	0.27	0.01	0.12	0.16	0.1	0.02
A0A8L2R3X1	ribose-phosphate diphosphokinase OS=Rattus norvegicus OX=10116 GN=Prps1 PE=3 SV=1	9	0.813	1.064	0.913	0.959	0.995	1.152	0.999	1.007	1.004	0.952	-0.3	0.09	-0.13	-0.06	-0.01	0.2	0	0.01	0.01	-0.07
Q9JJ54	Heterogeneous nuclear ribonucleoprotein D0 OS=Rattus norvegicus OX=10116 GN=Hnrnpd PE=1 SV=2	11	0.854	1.009	1.056	0.908	1.048	0.979	1.092	1.003	1.035	1.101	-0.23	0.01	0.08	-0.14	0.07	-0.03	0.13	0	0.05	0.14
P62907	60S ribosomal protein L10a OS=Rattus norvegicus OX=10116 GN=Rpl10a PE=1 SV=2	9	0.948	1.003	1.029	1.007	1.042	0.838	1.025	1.001	1.027	1.04	-0.08	0	0.04	0.01	0.06	-0.25	0.04	0	0.04	0.06
M0RBB1	Aly/REF export factor OS=Rattus norvegicus OX=10116 GN=Alyref PE=1 SV=3	6	0.798	0.89	0.952	0.936	1.016	0.9	0.991	0.918	0.96	1.014	-0.33	-0.17	-0.07	-0.1	0.02	-0.15	-0.01	-0.12	-0.06	0.02
A0A8I6GMG5	Secretion associated, Ras related GTPase 1A OS=Rattus norvegicus OX=10116 GN=Sar1a PE=1 SV=1	7	0.83	1.07	0.933	0.97	1.027	1.174	0.97	0.95	0.994	0.919	-0.27	0.1	-0.1	-0.04	0.04	0.23	-0.04	-0.07	-0.01	-0.12
Q75WE7	von Willebrand factor A domain-containing protein 5A OS=Rattus norvegicus OX=10116 GN=Vwa5a PE=2 SV=1	12	0.901	1.152	0.875	0.976	1	1.164	1.005	0.997	0.992	0.969	-0.15	0.2	-0.19	-0.04	0	0.22	0.01	0	-0.01	-0.04
A0A8I5ZT18	DnaJ heat shock protein family (Hsp40) member B6 OS=Rattus norvegicus OX=10116 GN=Dnajb6 PE=1 SV=1	9	0.947	0.869	0.979	0.935	1.023	0.822	1.037	1.064	1.041	1.054	-0.08	-0.2	-0.03	-0.1	0.03	-0.28	0.05	0.09	0.06	0.08
A0A0G2K4T8	Mitochondrial intermediate peptidase OS=Rattus norvegicus OX=10116 GN=Mipep PE=1 SV=2	12	0.996	1.118	0.978	1.043	0.978	1.012	1.038	1.09	1.029	0.987	-0.01	0.16	-0.03	0.06	-0.03	0.02	0.05	0.12	0.04	-0.02
A0A8L2QPN8	EMAP like 2 OS=Rattus norvegicus OX=10116 GN=Eml2 PE=1 SV=1	10	0.909	1.032	0.898	1.003	0.972	1.079	0.987	1.001	0.99	0.994	-0.14	0.05	-0.15	0	-0.04	0.11	-0.02	0	-0.02	-0.01
Q9Z1N4	3'(2'),5'-bisphosphate nucleotidase 1 OS=Rattus norvegicus OX=10116 GN=Bpnt1 PE=1 SV=1	10	0.818	0.634	1.009	0.921	1.029	0.629	1.096	0.9	1.037	1.173	-0.29	-0.66	0.01	-0.12	0.04	-0.67	0.13	-0.15	0.05	0.23
A0A8I6A0U0	LDL receptor related protein 1 OS=Rattus norvegicus OX=10116 GN=Lrp1 PE=1 SV=1	17	1.032	1.073	1.019	1.041	1.032	0.961	1.007	1.033	1.018	1.007	0.05	0.1	0.03	0.06	0.05	-0.06	0.01	0.05	0.03	0.01
G3V709	Nicotinate phosphoribosyltransferase OS=Rattus norvegicus OX=10116 GN=Naprt PE=1 SV=1	7	0.998	1.033	0.899	0.98	1.01	1.046	1.03	1.089	1.028	0.962	0	0.05	-0.15	-0.03	0.01	0.07	0.04	0.12	0.04	-0.06
Q4KMA2	UV excision repair protein RAD23 homolog B OS=Rattus norvegicus OX=10116 GN=Rad23b PE=1 SV=1	9	0.928	1.304	0.864	0.971	0.938	1.368	0.993	0.982	0.958	0.877	-0.11	0.38	-0.21	-0.04	-0.09	0.45	-0.01	-0.03	-0.06	-0.19
B5DEG8	LOC685144 protein OS=Rattus norvegicus OX=10116 GN=Sec24c PE=1 SV=1	11	0.996	1.131	0.979	1.063	1.015	1.021	0.994	1.055	1.009	1.013	-0.01	0.18	-0.03	0.09	0.02	0.03	-0.01	0.08	0.01	0.02
A0A8I6AM26	Arsenite-resistance protein 2 OS=Rattus norvegicus OX=10116 GN=Srrt PE=1 SV=1	10	0.98	1.114	0.936	0.975	1.06	0.948	1.025	1.049	1.032	0.99	-0.03	0.16	-0.1	-0.04	0.08	-0.08	0.04	0.07	0.05	-0.01
A0A8I5ZSR8	Caseinolytic mitochondrial matrix peptidase chaperone subunit B OS=Rattus norvegicus OX=10116 GN=Clpb PE=1 SV=1	11	1.021	0.966	1.054	1.006	1.095	0.926	1.083	1.121	1.101	1.086	0.03	-0.05	0.08	0.01	0.13	-0.11	0.12	0.16	0.14	0.12
B2RZ37	Receptor expression-enhancing protein 5 OS=Rattus norvegicus OX=10116 GN=Reep5 PE=1 SV=1	9	0.983	0.803	1.139	1.036	1.056	0.863	1.123	0.952	0.996	1.086	-0.02	-0.32	0.19	0.05	0.08	-0.21	0.17	-0.07	-0.01	0.12
D3ZXF9	Mitochondrial ribosomal protein L12 OS=Rattus norvegicus OX=10116 GN=Mrpl12 PE=1 SV=1	6	0.932	0.691	0.912	0.892	1.113	0.76	1.174	1.002	1.094	1.023	-0.1	-0.53	-0.13	-0.16	0.15	-0.4	0.23	0	0.13	0.03
A0A8I6ANY4	Nucleophosmin OS=Rattus norvegicus OX=10116 GN=ENSRNOG00000070424 PE=3 SV=1	9	0.992	0.854	1.124	1.011	1.177	0.663	1.248	1.251	1.093	1.056	-0.01	-0.23	0.17	0.02	0.24	-0.59	0.32	0.32	0.13	0.08
A0A8L2PZ08	Cytochrome c oxidase subunit OS=Rattus norvegicus OX=10116 GN=Cox6a1 PE=1 SV=1	5	0.616	0.565	0.83	0.742	1.042	0.629	0.848	0.728	0.82	0.834	-0.7	-0.82	-0.27	-0.43	0.06	-0.67	-0.24	-0.46	-0.29	-0.26
D3ZRE7	Switching B-cell complex subunit SWAP70 OS=Rattus norvegicus OX=10116 GN=Swap70 PE=4 SV=2	12	0.916	1.299	0.894	0.993	1.018	1.279	0.977	0.999	0.987	0.938	-0.13	0.38	-0.16	-0.01	0.03	0.36	-0.03	0	-0.02	-0.09
Q5FWY5	AH receptor-interacting protein OS=Rattus norvegicus OX=10116 GN=Aip PE=1 SV=1	12	1.102	1.09	0.978	1.094	1.055	1.154	1.011	1.092	1.039	1.011	0.14	0.12	-0.03	0.13	0.08	0.21	0.02	0.13	0.06	0.02
A0A0G2K5J3	Mitofusin 1 OS=Rattus norvegicus OX=10116 GN=Mfn1 PE=1 SV=2	14	0.94	1.161	0.851	0.85	0.978	1.081	0.995	1.13	1.072	0.973	-0.09	0.22	-0.23	-0.23	-0.03	0.11	-0.01	0.18	0.1	-0.04
Q5HZY2	GTP-binding protein SAR1b OS=Rattus norvegicus OX=10116 GN=Sar1b PE=2 SV=1	7	1.027	1.249	1.145	1.161	1.187	1.257	1.207	1.031	1.118	1.163	0.04	0.32	0.2	0.21	0.25	0.33	0.27	0.04	0.16	0.22
Q9EPT8	Chloride intracellular channel protein 5 OS=Rattus norvegicus OX=10116 GN=Clic5 PE=1 SV=1	9	1.017	0.836	1.076	0.968	1.037	0.98	1.068	1.064	1.125	1.146	0.02	-0.26	0.11	-0.05	0.05	-0.03	0.1	0.09	0.17	0.2
D3ZSD8	Transmembrane protein 143 OS=Rattus norvegicus OX=10116 GN=Tmem143 PE=1 SV=1	10	1.316	1.057	1.006	1.054	1.047	0.87	1.02	1.011	0.982	1.039	0.4	0.08	0.01	0.08	0.07	-0.2	0.03	0.02	-0.03	0.06
F1LRX2	Formin homology 2 domain containing 3 OS=Rattus norvegicus OX=10116 GN=Fhod3 PE=4 SV=3	9	1.088	0.815	1.108	1.187	1.856	0.704	1.261	1.327	1.326	1.203	0.12	-0.3	0.15	0.25	0.89	-0.51	0.33	0.41	0.41	0.27
A0A8I6A239	Acetyl-CoA carboxylase 1 OS=Rattus norvegicus OX=10116 GN=Acaca PE=1 SV=1	13	0.941	1.236	0.892	0.917	0.94	2.301	0.974	1.037	0.994	0.903	-0.09	0.31	-0.16	-0.13	-0.09	1.2	-0.04	0.05	-0.01	-0.15
A0A0G2K7C1	Large proline-rich protein BAG6 OS=Rattus norvegicus OX=10116 GN=Bag6 PE=1 SV=2	10	0.96	1.259	0.933	0.962	0.934	1.071	0.924	0.93	0.934	0.913	-0.06	0.33	-0.1	-0.06	-0.1	0.1	-0.11	-0.1	-0.1	-0.13
D3ZH28	Alpha-kinase 3 OS=Rattus norvegicus OX=10116 GN=Alpk3 PE=1 SV=2	14	0.92	1.064	0.982	0.976	0.993	1.059	1.047	1.435	1.052	1.459	-0.12	0.09	-0.03	-0.04	-0.01	0.08	0.07	0.52	0.07	0.54
A0A8I5ZX80	heme oxygenase (biliverdin-producing) OS=Rattus norvegicus OX=10116 GN=Hmox2 PE=1 SV=1	11	0.907	0.963	0.961	0.952	1.04	0.883	0.988	0.997	1.012	1.026	-0.14	-0.05	-0.06	-0.07	0.06	-0.18	-0.02	0	0.02	0.04
P29314	40S ribosomal protein S9 OS=Rattus norvegicus OX=10116 GN=Rps9 PE=1 SV=4	13	0.692	0.788	1.099	0.946	1.058	0.802	1.097	1.032	1.102	1.149	-0.53	-0.34	0.14	-0.08	0.08	-0.32	0.13	0.05	0.14	0.2
P63326	40S ribosomal protein S10 OS=Rattus norvegicus OX=10116 GN=Rps10 PE=1 SV=1	9	0.99	1.02	0.978	0.994	1.009	0.931	1.018	1.001	0.987	0.989	-0.01	0.03	-0.03	-0.01	0.01	-0.1	0.03	0	-0.02	-0.02
A6HIS0	RCG32667 OS=Rattus norvegicus OX=10116 GN=Tcap PE=1 SV=1	8	0.958	0.785	1.024	0.931	0.967	0.574	1.125	1.073	1.13	1.171	-0.06	-0.35	0.03	-0.1	-0.05	-0.8	0.17	0.1	0.18	0.23
A0A8L2Q9P3	Mitochondrial import receptor subunit TOM22 homolog OS=Rattus norvegicus OX=10116 GN=Tomm22 PE=1 SV=1	5	0.94	0.845	0.995	1.008	1.052	0.839	1.016	0.958	0.984	1.018	-0.09	-0.24	-0.01	0.01	0.07	-0.25	0.02	-0.06	-0.02	0.03
M0RAD5	ATP-dependent Clp protease proteolytic subunit OS=Rattus norvegicus OX=10116 GN=Clpp PE=1 SV=2	8	1.009	0.955	1.02	1.013	1.052	0.83	1.016	1.04	1.001	0.998	0.01	-0.07	0.03	0.02	0.07	-0.27	0.02	0.06	0	0
D3ZJ08	Histone H3 OS=Rattus norvegicus OX=10116 GN=Hist2h3c2 PE=3 SV=1	11	1.151	0.932	1.116	1.379	0.899	1.622	0.84	1.144	0.795	0.761	0.2	-0.1	0.16	0.46	-0.15	0.7	-0.25	0.19	-0.33	-0.39
A0A8L2Q6N7	Cell cycle associated protein 1 OS=Rattus norvegicus OX=10116 GN=Caprin1 PE=1 SV=1	8	0.892	0.946	1.04	0.862	0.933	1.004	1.083	0.924	1.138	1.283	-0.17	-0.08	0.06	-0.21	-0.1	0.01	0.11	-0.11	0.19	0.36
Q5U2U2	Crk-like protein OS=Rattus norvegicus OX=10116 GN=Crkl PE=1 SV=1	9	0.983	1.091	0.963	1.003	1.019	0.994	1.044	1.023	1.022	1.023	-0.03	0.13	-0.05	0	0.03	-0.01	0.06	0.03	0.03	0.03
A0A8I5ZWF8	ATP synthase subunit d, mitochondrial OS=Rattus norvegicus OX=10116 GN=Atp5hl1 PE=1 SV=1	9	0.993	0.725	1.021	0.989	1.18	0.567	1.084	1.066	1.137	1.06	-0.01	-0.46	0.03	-0.02	0.24	-0.82	0.12	0.09	0.19	0.08
Q9WVJ4	Synaptojanin-2-binding protein OS=Rattus norvegicus OX=10116 GN=Synj2bp PE=1 SV=2	7	1.013	0.771	0.955	1.013	1.064	0.663	1.049	1.014	1.022	0.955	0.02	-0.38	-0.07	0.02	0.09	-0.59	0.07	0.02	0.03	-0.07
M0R515	NAD(+) diphosphatase OS=Rattus norvegicus OX=10116 GN=Nudt13 PE=1 SV=1	9	0.989	0.707	1.007	1.091	1.182	0.807	1.092	1.044	1.048	1.058	-0.02	-0.5	0.01	0.13	0.24	-0.31	0.13	0.06	0.07	0.08
A0A8I6GLD7	NADH dehydrogenase (ubiquinone) Fe-S protein 6 OS=Rattus norvegicus OX=10116 GN=Ndufs6l1 PE=1 SV=1	5	0.985	0.616	1.113	1.005	1.125	0.525	1.287	1.054	1.141	1.208	-0.02	-0.7	0.15	0.01	0.17	-0.93	0.36	0.08	0.19	0.27
Q3MHT2	cysteine desulfurase OS=Rattus norvegicus OX=10116 GN=Nfs1 PE=1 SV=1	10	1.294	1.121	0.933	1.051	1.026	1.071	0.983	1.009	0.992	0.962	0.37	0.16	-0.1	0.07	0.04	0.1	-0.02	0.01	-0.01	-0.06
Q5U316	Ras-related protein Rab-35 OS=Rattus norvegicus OX=10116 GN=Rab35 PE=1 SV=1	11	0.986	1.172	1.093	1.093	1.089	1.14	1.106	1.044	1.055	1.047	-0.02	0.23	0.13	0.13	0.12	0.19	0.14	0.06	0.08	0.07
P57093	Phytanoyl-CoA dioxygenase, peroxisomal OS=Rattus norvegicus OX=10116 GN=Phyh PE=1 SV=2	9	1.048	0.803	1.067	1.097	1.084	0.734	1.125	1.186	1.066	1.156	0.07	-0.32	0.09	0.13	0.12	-0.45	0.17	0.25	0.09	0.21
A0A8L2QE16	Ras-related protein Rab-3 OS=Rattus norvegicus OX=10116 GN=Rab3a PE=1 SV=1	8	1.036	1.086	1.038	1.01	1.109	1.001	1.06	1.067	1.029	1.08	0.05	0.12	0.05	0.01	0.15	0	0.08	0.09	0.04	0.11
B1H271	Mitochondrial coenzyme A transporter SLC25A42 OS=Rattus norvegicus OX=10116 GN=Slc25a42 PE=1 SV=1	8	0.854	0.705	0.931	0.801	1.032	0.706	1.025	1.018	1.085	1.134	-0.23	-0.5	-0.1	-0.32	0.04	-0.5	0.04	0.03	0.12	0.18
D3ZZ21	NADH dehydrogenase [ubiquinone] 1 beta subcomplex subunit 6 OS=Rattus norvegicus OX=10116 GN=Ndufb6 PE=1 SV=1	6	0.91	0.61	1.002	0.905	1.029	0.571	0.997	0.914	0.985	1.047	-0.14	-0.71	0	-0.14	0.04	-0.81	0	-0.13	-0.02	0.07
P23457	3-alpha-hydroxysteroid dehydrogenase OS=Rattus norvegicus OX=10116 GN=Akr1c9 PE=1 SV=1	10	0.98	0.955	0.972	1.012	1.041	1.03	0.949	0.963	0.953	0.929	-0.03	-0.07	-0.04	0.02	0.06	0.04	-0.08	-0.05	-0.07	-0.11
A0A8I5ZLU6	Afadin, adherens junction formation factor OS=Rattus norvegicus OX=10116 GN=Afdn PE=1 SV=1	15	1.152	1.364	0.871	1.065	0.908	0.98	0.973	1.046	0.994	0.822	0.2	0.45	-0.2	0.09	-0.14	-0.03	-0.04	0.07	-0.01	-0.28
A0A8I5ZNB8	Vesicle-associated membrane protein 2 OS=Rattus norvegicus OX=10116 GN=Vamp2 PE=1 SV=1	4	1.142	1.384	0.914	0.985	0.975	0.974	0.934	1.162	1.026	1.015	0.19	0.47	-0.13	-0.02	-0.04	-0.04	-0.1	0.22	0.04	0.02
F1LSF5	Perilipin OS=Rattus norvegicus OX=10116 GN=Plin1 PE=1 SV=4	9	0.717	2.796	0.651	0.859	0.717	3.236	0.767	0.875	0.695	0.664	-0.48	1.48	-0.62	-0.22	-0.48	1.69	-0.38	-0.19	-0.52	-0.59
A0A8J8XPQ6	m7GpppX diphosphatase OS=Rattus norvegicus OX=10116 GN=Dcps PE=1 SV=1	11	0.912	0.975	0.967	1.059	0.983	1.124	0.982	1.05	1.013	1.036	-0.13	-0.04	-0.05	0.08	-0.02	0.17	-0.03	0.07	0.02	0.05
A0A8I6AB50	Adenosine deaminase OS=Rattus norvegicus OX=10116 GN=Ada PE=1 SV=1	9	1.463	0.709	1.241	1.169	0.966	0.776	0.947	0.903	1.013	1.043	0.55	-0.5	0.31	0.22	-0.05	-0.37	-0.08	-0.15	0.02	0.06
A0A8I6AG33	Transportin 1 OS=Rattus norvegicus OX=10116 GN=Tnpo1 PE=1 SV=1	9	0.827	0.955	0.896	0.925	0.991	1.006	1.031	0.946	0.993	1.018	-0.27	-0.07	-0.16	-0.11	-0.01	0.01	0.04	-0.08	-0.01	0.03
Q642B0	Glypican 4 OS=Rattus norvegicus OX=10116 GN=Gpc4 PE=1 SV=1	9	0.992	1.685	0.932	1.038	0.982	1.069	0.962	0.98	0.981	0.894	-0.01	0.75	-0.1	0.05	-0.03	0.1	-0.06	-0.03	-0.03	-0.16
D3ZZV1	Presequence translocase associated motor 16 OS=Rattus norvegicus OX=10116 GN=Pam16 PE=1 SV=1	8	0.939	0.814	0.997	1.062	1.126	0.728	0.979	1.023	1.083	1.019	-0.09	-0.3	0	0.09	0.17	-0.46	-0.03	0.03	0.11	0.03
D3ZZ80	Obscurin-like protein 1 OS=Rattus norvegicus OX=10116 GN=Obsl1 PE=2 SV=3	11	1.101	0.851	0.979	1.015	1.071	0.701	1.027	0.996	1.034	1.026	0.14	-0.23	-0.03	0.02	0.1	-0.51	0.04	-0.01	0.05	0.04
A0A343F2J5	NADH-ubiquinone oxidoreductase chain 1 OS=Sundamys maxi OX=2021985 GN=ND1 PE=3 SV=1	6	0.809	0.714	1.008	0.935	1.024	0.622	0.97	0.95	1.006	1.056	-0.31	-0.49	0.01	-0.1	0.03	-0.69	-0.04	-0.07	0.01	0.08
E7C9M1	NADH-ubiquinone oxidoreductase chain 5 OS=Rattus sordidus OX=10120 GN=ND5 PE=3 SV=1	6	0.964	0.675	1.291	1.209	1.247	0.781	1.18	0.965	0.907	1.001	-0.05	-0.57	0.37	0.27	0.32	-0.36	0.24	-0.05	-0.14	0
A0A0G2K5C6	Microtubule-associated protein 1A OS=Rattus norvegicus OX=10116 GN=Map1a PE=1 SV=1	13	1.012	1.218	0.994	0.934	0.944	1.292	0.99	1.043	1.024	0.96	0.02	0.28	-0.01	-0.1	-0.08	0.37	-0.01	0.06	0.03	-0.06
A3KMH4	Arhgef7 protein (Fragment) OS=Rattus norvegicus OX=10116 GN=Arhgef7 PE=2 SV=1	9	0.891	0.76	1.002	0.959	1.001	0.937	1.094	0.978	1	1.139	-0.17	-0.4	0	-0.06	0	-0.09	0.13	-0.03	0	0.19
B2GVB9	FERM domain containing kindlin 3 OS=Rattus norvegicus OX=10116 GN=Fermt3 PE=1 SV=1	10	0.829	0.973	0.846	0.946	1.051	1.152	0.877	0.941	0.935	0.869	-0.27	-0.04	-0.24	-0.08	0.07	0.2	-0.19	-0.09	-0.1	-0.2
B0BMS8	Myl9 protein OS=Rattus norvegicus OX=10116 GN=Myl9 PE=1 SV=1	9	0.915	1.322	0.798	0.882	0.773	2.98	0.876	0.876	0.839	0.769	-0.13	0.4	-0.33	-0.18	-0.37	1.58	-0.19	-0.19	-0.25	-0.38
Q3KRD5	Mitochondrial import receptor subunit TOM34 OS=Rattus norvegicus OX=10116 GN=Tomm34 PE=1 SV=1	10	0.942	1.297	0.946	1.01	1.001	1.151	1.011	1.027	0.976	1.017	-0.09	0.38	-0.08	0.01	0	0.2	0.02	0.04	-0.04	0.02
Q4KLZ0	Vanin 1 OS=Rattus norvegicus OX=10116 GN=Vnn1 PE=1 SV=1	7	0.91	1.421	0.937	0.945	0.947	1.244	0.926	1.031	0.947	0.941	-0.14	0.51	-0.09	-0.08	-0.08	0.31	-0.11	0.04	-0.08	-0.09
A0A8I5ZUL9	LRR binding FLII interacting protein 2 OS=Rattus norvegicus OX=10116 GN=Lrrfip2 PE=1 SV=1	10	1.009	0.974	1.004	0.92	1.057	0.873	1.147	1.051	1.146	1.16	0.01	-0.04	0.01	-0.12	0.08	-0.2	0.2	0.07	0.2	0.21
A0A8I6AIG7	Transmembrane p24 trafficking protein 10 OS=Rattus norvegicus OX=10116 GN=Tmed10 PE=1 SV=1	8	1.03	1.53	0.977	1.013	1.02	1.306	0.998	0.954	0.956	0.974	0.04	0.61	-0.03	0.02	0.03	0.39	0	-0.07	-0.06	-0.04
F7FQB8	Karyopherin subunit alpha 4 OS=Rattus norvegicus OX=10116 GN=Kpna4 PE=1 SV=1	6	0.936	0.968	1.05	1.05	1.057	1.017	1.086	0.983	1.034	1.03	-0.1	-0.05	0.07	0.07	0.08	0.02	0.12	-0.02	0.05	0.04
D3Z9L0	Acylglycerol kinase, mitochondrial OS=Rattus norvegicus OX=10116 GN=Agk PE=1 SV=2	11	0.861	0.824	0.958	0.954	1.009	0.899	1.03	1.008	1.01	1.005	-0.22	-0.28	-0.06	-0.07	0.01	-0.15	0.04	0.01	0.01	0.01
A0A8L2QVY8	Ribosomal protein L3 OS=Rattus norvegicus OX=10116 GN=Rpl3 PE=1 SV=1	12	0.85	1.604	0.87	1.05	0.906	1.419	0.937	1.034	0.966	0.904	-0.23	0.68	-0.2	0.07	-0.14	0.5	-0.09	0.05	-0.05	-0.15
P80385	5'-AMP-activated protein kinase subunit gamma-1 OS=Rattus norvegicus OX=10116 GN=Prkag1 PE=1 SV=3	8	0.838	0.807	0.96	0.928	1.083	0.939	1.377	1.139	1.11	1.135	-0.26	-0.31	-0.06	-0.11	0.11	-0.09	0.46	0.19	0.15	0.18
A0A0G2JWE1	Myosin light chain 6 OS=Rattus norvegicus OX=10116 GN=LOC685883 PE=1 SV=2	9	1.21	1.29	1.037	1.026	0.88	2.172	0.725	0.865	0.683	0.722	0.27	0.37	0.05	0.04	-0.18	1.12	-0.46	-0.21	-0.55	-0.47
Q80X08	WASH complex subunit 2 OS=Rattus norvegicus OX=10116 GN=Washc2 PE=1 SV=1	13	1.218	1.041	0.983	1.01	1.21	1.284	1.788	1.241	1.46	1.488	0.28	0.06	-0.02	0.01	0.27	0.36	0.84	0.31	0.55	0.57
A0A0G2K264	Death associated protein 3 OS=Rattus norvegicus OX=10116 GN=Dap3 PE=1 SV=2	7	0.826	0.941	0.958	0.942	0.938	0.921	0.984	0.967	1.015	1.063	-0.28	-0.09	-0.06	-0.09	-0.09	-0.12	-0.02	-0.05	0.02	0.09
Q8VH49	HIG1 domain family member 1A, mitochondrial OS=Rattus norvegicus OX=10116 GN=Higd1a PE=1 SV=2	5	0.521	0.358	0.864	0.661	0.99	0.453	0.861	0.693	0.845	0.96	-0.94	-1.48	-0.21	-0.6	-0.01	-1.14	-0.22	-0.53	-0.24	-0.06
B0BN18	Prefoldin subunit 2 OS=Rattus norvegicus OX=10116 GN=Pfdn2 PE=2 SV=1	5	1.464	1.146	0.947	1.013	1.027	1.097	0.968	0.989	0.995	0.905	0.55	0.2	-0.08	0.02	0.04	0.13	-0.05	-0.02	-0.01	-0.14
P36201	Cysteine-rich protein 2 OS=Rattus norvegicus OX=10116 GN=Crip2 PE=2 SV=1	6	0.784	0.836	1.169	0.849	1.035	0.756	1.175	0.986	1.146	1.191	-0.35	-0.26	0.22	-0.24	0.05	-0.4	0.23	-0.02	0.2	0.25
F1LWG4	Complex I intermediate-associated protein 30, mitochondrial OS=Rattus norvegicus OX=10116 GN=Ndufaf1 PE=1 SV=2	10	0.969	0.961	0.978	1.011	1.042	0.779	1.046	1.058	1.075	1.049	-0.05	-0.06	-0.03	0.02	0.06	-0.36	0.06	0.08	0.1	0.07
F1LMW7	Myristoylated alanine rich protein kinase C substrate OS=Rattus norvegicus OX=10116 GN=Marcks PE=1 SV=4	8	0.659	1.073	0.99	0.951	0.94	2.09	1.137	1.172	1.01	1.148	-0.6	0.1	-0.01	-0.07	-0.09	1.06	0.18	0.23	0.02	0.2
O08629	Transcription intermediary factor 1-beta OS=Rattus norvegicus OX=10116 GN=Trim28 PE=1 SV=2	9	0.921	1.282	0.878	1.017	0.973	1.26	0.986	1.063	0.991	0.994	-0.12	0.36	-0.19	0.02	-0.04	0.33	-0.02	0.09	-0.01	-0.01
A0A8I6GHL3	Platelet and endothelial cell adhesion molecule 1 OS=Rattus norvegicus OX=10116 GN=Pecam1 PE=1 SV=1	10	0.879	0.978	0.984	0.976	1.027	0.874	1.047	0.953	1.023	1.034	-0.19	-0.03	-0.02	-0.04	0.04	-0.19	0.07	-0.07	0.03	0.05
Q6IRK9	Carboxypeptidase Q OS=Rattus norvegicus OX=10116 GN=Cpq PE=1 SV=1	7	1.147	1.409	0.865	1.083	1.074	1.408	1.048	1.054	1.019	0.93	0.2	0.49	-0.21	0.11	0.1	0.49	0.07	0.08	0.03	-0.11
Q6AYD9	Acyl-coenzyme A diphosphatase NUDT19 OS=Rattus norvegicus OX=10116 GN=Nudt19 PE=2 SV=1	10	1.153	0.819	1.065	1.059	1.028	0.806	1.04	0.99	1.025	1.007	0.2	-0.29	0.09	0.08	0.04	-0.31	0.06	-0.01	0.04	0.01
A0A8L2UK05	Angiotensinogen OS=Rattus norvegicus OX=10116 GN=Agt PE=1 SV=1	8	0.953	1.549	0.809	1.027	0.909	1.695	1.013	1.095	1.004	0.743	-0.07	0.63	-0.31	0.04	-0.14	0.76	0.02	0.13	0.01	-0.43
B5DF89	Cullin-3 OS=Rattus norvegicus OX=10116 GN=Cul3 PE=1 SV=2	13	0.822	1.033	0.897	0.956	0.981	0.996	0.979	0.95	1.011	1.007	-0.28	0.05	-0.16	-0.07	-0.03	-0.01	-0.03	-0.07	0.02	0.01
P63170	Dynein light chain 1, cytoplasmic OS=Rattus norvegicus OX=10116 GN=Dynll1 PE=1 SV=1	6	0.697	0.803	1.01	0.764	1.058	0.911	0.853	0.756	0.788	0.874	-0.52	-0.32	0.01	-0.39	0.08	-0.13	-0.23	-0.4	-0.34	-0.19
Q6AXQ0	SUMO-activating enzyme subunit 1 OS=Rattus norvegicus OX=10116 GN=Sae1 PE=2 SV=1	9	1.035	1.41	0.976	1.198	1.07	1.172	1.276	2.779	1.176	1.358	0.05	0.5	-0.03	0.26	0.1	0.23	0.35	1.47	0.23	0.44
A7BFV9	Epidermal growth factor receptor pathway substrate 15 OS=Rattus norvegicus OX=10116 GN=Eps15 PE=1 SV=1	8	1.064	1.088	1.004	1.128	1.085	1.185	1.024	1.151	1.123	1.013	0.09	0.12	0.01	0.17	0.12	0.24	0.03	0.2	0.17	0.02
B2RYP0	Ras homolog family member C OS=Rattus norvegicus OX=10116 GN=Rhoc PE=1 SV=1	6	0.787	1.018	0.913	0.89	0.983	0.832	1.023	0.919	1.138	1.164	-0.35	0.03	-0.13	-0.17	-0.02	-0.27	0.03	-0.12	0.19	0.22
E9PT51	DNA polymerase delta interacting protein 2 OS=Rattus norvegicus OX=10116 GN=Poldip2 PE=1 SV=3	11	1.581	1.168	0.97	0.998	1.025	0.915	0.907	1.021	0.969	0.944	0.66	0.22	-0.04	0	0.04	-0.13	-0.14	0.03	-0.05	-0.08
F7EUU4	COP9 signalosome subunit 5 OS=Rattus norvegicus OX=10116 GN=Cops5 PE=1 SV=1	8	0.868	1.122	0.933	0.957	0.992	1.057	1.098	1.62	1.08	1.16	-0.2	0.17	-0.1	-0.06	-0.01	0.08	0.13	0.7	0.11	0.21
D3ZV82	RCG28487 OS=Rattus norvegicus OX=10116 GN=Gbp7 PE=1 SV=4	8	0.885	1.141	0.875	0.963	0.931	1.187	1.027	1.059	1.045	0.904	-0.18	0.19	-0.19	-0.05	-0.1	0.25	0.04	0.08	0.06	-0.15
B5DFC9	Nidogen-2 OS=Rattus norvegicus OX=10116 GN=Nid2 PE=2 SV=1	12	1.492	1.388	1.129	1.114	1.084	1.057	0.878	0.829	0.942	0.916	0.58	0.47	0.17	0.16	0.12	0.08	-0.19	-0.27	-0.09	-0.13
A0A8I5ZY58	Ribosomal protein L15 OS=Rattus norvegicus OX=10116 GN=LOC100362479 PE=3 SV=1	8	0.698	0.796	1.119	0.974	1.075	0.684	1.047	0.96	1.009	1.121	-0.52	-0.33	0.16	-0.04	0.1	-0.55	0.07	-0.06	0.01	0.16
D4A8H3	E1 ubiquitin-activating enzyme OS=Rattus norvegicus OX=10116 GN=Uba6 PE=1 SV=1	12	0.837	0.819	1.01	0.938	1.028	0.842	1.068	1.065	1.013	1.098	-0.26	-0.29	0.01	-0.09	0.04	-0.25	0.1	0.09	0.02	0.13
A0A8I6GGC8	Galectin OS=Rattus norvegicus OX=10116 GN=Lgals1 PE=1 SV=1	7	0.945	1.034	1.103	0.903	0.912	2.265	0.892	0.957	0.92	0.935	-0.08	0.05	0.14	-0.15	-0.13	1.18	-0.16	-0.06	-0.12	-0.1
Q09137	5'-AMP-activated protein kinase catalytic subunit alpha-2 OS=Rattus norvegicus OX=10116 GN=Prkaa2 PE=1 SV=1	10	0.866	1.044	0.933	0.914	0.975	0.929	0.993	1.025	1	1.034	-0.21	0.06	-0.1	-0.13	-0.04	-0.11	-0.01	0.04	0	0.05
Q6PCT3	Tumor protein D54 OS=Rattus norvegicus OX=10116 GN=Tpd52l2 PE=1 SV=1	8	1.03	1.211	0.952	1.052	1.057	1.111	1.08	1.028	1.08	1.056	0.04	0.28	-0.07	0.07	0.08	0.15	0.11	0.04	0.11	0.08
B5DFK6	Adaptor related protein complex 3 subunit delta 1 OS=Rattus norvegicus OX=10116 GN=Ap3d1 PE=1 SV=1	11	0.954	1.257	0.894	0.943	0.979	1.029	1.058	1.116	1.067	0.983	-0.07	0.33	-0.16	-0.09	-0.03	0.04	0.08	0.16	0.09	-0.02
G3V617	Mitogen-activated protein kinase 14 OS=Rattus norvegicus OX=10116 GN=Mapk14 PE=1 SV=1	8	0.922	1.063	0.995	1.059	1.118	0.892	1.066	1.047	1.049	1.011	-0.12	0.09	-0.01	0.08	0.16	-0.16	0.09	0.07	0.07	0.02
B2RYT9	Translational activator of cytochrome c oxidase 1 OS=Rattus norvegicus OX=10116 GN=Taco1 PE=2 SV=1	7	0.979	0.969	1.01	1.046	1.116	0.758	1.043	1.003	1.059	0.982	-0.03	-0.05	0.01	0.06	0.16	-0.4	0.06	0	0.08	-0.03
A0A0G2JU49	Metaxin 1 OS=Rattus norvegicus OX=10116 GN=Mtx1 PE=1 SV=1	11	0.794	0.897	0.919	0.913	1.052	0.873	1.037	0.967	1.055	1.084	-0.33	-0.16	-0.12	-0.13	0.07	-0.2	0.05	-0.05	0.08	0.12
Q6AYG3	Exopolyphosphatase PRUNE1 OS=Rattus norvegicus OX=10116 GN=Prune1 PE=1 SV=1	10	0.927	0.96	0.968	1.07	1.03	0.961	1.081	1.014	1.043	1.028	-0.11	-0.06	-0.05	0.1	0.04	-0.06	0.11	0.02	0.06	0.04
P21708	Mitogen-activated protein kinase 3 OS=Rattus norvegicus OX=10116 GN=Mapk3 PE=1 SV=5	9	1.057	1.175	0.925	1.054	1.121	1.091	0.979	1.141	1.116	1.043	0.08	0.23	-0.11	0.08	0.17	0.13	-0.03	0.19	0.16	0.06
Q4KLI7	Splicing factor 3a, subunit 3 OS=Rattus norvegicus OX=10116 GN=Sf3a3 PE=1 SV=1	8	0.942	0.956	0.988	0.978	1.143	0.982	1.085	1.068	1.084	1.099	-0.09	-0.07	-0.02	-0.03	0.19	-0.03	0.12	0.1	0.12	0.14
A0A140TAH1	Hepatocyte growth factor-regulated tyrosine kinase substrate OS=Rattus norvegicus OX=10116 GN=Hgs PE=1 SV=2	8	1.052	1.114	0.911	0.962	1.028	1.118	0.92	0.953	0.993	0.9	0.07	0.16	-0.13	-0.06	0.04	0.16	-0.12	-0.07	-0.01	-0.15
A0A0F7RQJ6	D-dopachrome tautomerase OS=Rattus norvegicus OX=10116 GN=Ddt PE=1 SV=1	6	0.931	0.98	0.896	1.067	0.936	1.009	1.03	0.963	1.01	1.043	-0.1	-0.03	-0.16	0.09	-0.1	0.01	0.04	-0.05	0.01	0.06
Q6P4Z9	COP9 signalosome complex subunit 8 OS=Rattus norvegicus OX=10116 GN=Cops8 PE=2 SV=1	6	1.08	1.204	0.953	1.076	1.081	1.036	1.025	1.052	1.044	0.995	0.11	0.27	-0.07	0.11	0.11	0.05	0.04	0.07	0.06	-0.01
P21670	Proteasome subunit alpha type-4 OS=Rattus norvegicus OX=10116 GN=Psma4 PE=1 SV=1	9	0.807	1.02	0.952	0.935	0.987	1.189	1.052	0.995	1.079	1.036	-0.31	0.03	-0.07	-0.1	-0.02	0.25	0.07	-0.01	0.11	0.05
A0A8I5ZV77	Mitochondrial ribosomal protein S36 OS=Rattus norvegicus OX=10116 GN=Mrps36 PE=1 SV=1	5	1.025	0.873	1.065	1.065	1.091	0.817	1.071	1.039	1.076	1.121	0.04	-0.2	0.09	0.09	0.13	-0.29	0.1	0.05	0.11	0.16
A0A8I6AI05	Trafficking kinesin protein 1 OS=Rattus norvegicus OX=10116 GN=Trak1 PE=3 SV=1	8	0.929	0.824	1.063	1.024	1.207	0.808	1.118	1.113	1.191	1.211	-0.11	-0.28	0.09	0.03	0.27	-0.31	0.16	0.15	0.25	0.28
Q923M1	Mitochondrial peptide methionine sulfoxide reductase OS=Rattus norvegicus OX=10116 GN=Msra PE=1 SV=1	7	0.956	0.895	1.008	1.016	1.017	0.966	1.069	1.023	1.023	1.034	-0.06	-0.16	0.01	0.02	0.02	-0.05	0.1	0.03	0.03	0.05
D4AB01	Histidine triad nucleotide binding protein 2 OS=Rattus norvegicus OX=10116 GN=Hint2 PE=3 SV=2	6	0.921	0.893	1.05	1.075	1.075	0.844	1.119	1.16	1.061	1.166	-0.12	-0.16	0.07	0.1	0.1	-0.24	0.16	0.21	0.09	0.22
D4A3E8	Mitochondrial ribosomal protein S27 OS=Rattus norvegicus OX=10116 GN=Mrps27 PE=1 SV=1	11	0.821	1.045	0.922	0.995	1.042	1.33	0.971	1.073	1.03	1.036	-0.28	0.06	-0.12	-0.01	0.06	0.41	-0.04	0.1	0.04	0.05
E9PT29	RNA helicase OS=Rattus norvegicus OX=10116 GN=Ddx17 PE=1 SV=4	12	1.048	1.191	0.952	1.084	0.981	0.938	0.961	1.078	1.008	0.971	0.07	0.25	-0.07	0.12	-0.03	-0.09	-0.06	0.11	0.01	-0.04
A0A8I6GLV2	5'-nucleotidase, cytosolic II OS=Rattus norvegicus OX=10116 GN=Nt5c2 PE=1 SV=1	10	1.113	1.081	1.041	0.942	1.021	1.001	0.962	0.924	0.951	0.951	0.15	0.11	0.06	-0.09	0.03	0	-0.06	-0.11	-0.07	-0.07
B1H2A6	Fxr2 protein OS=Rattus norvegicus OX=10116 GN=Fxr2 PE=1 SV=1	11	0.949	0.952	0.998	1.028	0.981	0.801	1.109	1.138	1.1	1.088	-0.07	-0.07	0	0.04	-0.03	-0.32	0.15	0.19	0.14	0.12
P61765	Syntaxin-binding protein 1 OS=Rattus norvegicus OX=10116 GN=Stxbp1 PE=1 SV=1	10	0.973	1.233	0.95	0.981	1.001	1.219	0.971	1.027	1.043	0.997	-0.04	0.3	-0.07	-0.03	0	0.29	-0.04	0.04	0.06	0
A0A8I5ZU95	Transmembrane protein 126A OS=Rattus norvegicus OX=10116 GN=Tmem126a PE=1 SV=1	7	0.586	0.542	0.811	0.734	0.982	0.517	0.881	0.813	0.901	0.866	-0.77	-0.88	-0.3	-0.45	-0.03	-0.95	-0.18	-0.3	-0.15	-0.21
O08557	N(G),N(G)-dimethylarginine dimethylaminohydrolase 1 OS=Rattus norvegicus OX=10116 GN=Ddah1 PE=1 SV=3	9	0.889	1.255	0.865	0.936	0.936	1.192	0.956	1.094	0.986	0.883	-0.17	0.33	-0.21	-0.1	-0.1	0.25	-0.06	0.13	-0.02	-0.18
A0A8I6GEL5	40S ribosomal protein S7 OS=Rattus norvegicus OX=10116 GN=Rps7-ps23 PE=3 SV=1	9	0.661	0.672	1.11	0.814	0.923	0.676	0.986	0.863	0.999	1.131	-0.6	-0.57	0.15	-0.3	-0.12	-0.56	-0.02	-0.21	0	0.18
P62959	Adenosine 5'-monophosphoramidase HINT1 OS=Rattus norvegicus OX=10116 GN=Hint1 PE=1 SV=5	8	0.818	1.015	0.952	0.922	0.939	1.208	1.011	0.995	0.999	1.053	-0.29	0.02	-0.07	-0.12	-0.09	0.27	0.02	-0.01	0	0.07
A0A8L2QPS4	ethanolamine-phosphate cytidylyltransferase OS=Rattus norvegicus OX=10116 GN=Pcyt2 PE=1 SV=1	10	0.865	0.845	0.953	0.957	1.057	0.927	1.06	0.988	1.04	1.017	-0.21	-0.24	-0.07	-0.06	0.08	-0.11	0.08	-0.02	0.06	0.02
Q4V8E2	Proteasome (Prosome, macropain) 26S subunit, non-ATPase, 14 OS=Rattus norvegicus OX=10116 GN=Psmd14 PE=1 SV=1	8	0.921	1.151	0.888	0.974	1.014	1.06	1.02	1.074	1.047	0.973	-0.12	0.2	-0.17	-0.04	0.02	0.08	0.03	0.1	0.07	-0.04
P29117	Peptidyl-prolyl cis-trans isomerase F, mitochondrial OS=Rattus norvegicus OX=10116 GN=Ppif PE=1 SV=2	11	1.098	1.011	0.996	1.036	1.006	0.793	1.017	1.018	1.007	1.015	0.13	0.02	-0.01	0.05	0.01	-0.34	0.02	0.03	0.01	0.02
A0A8I6ARV8	Ankyrin repeat domain 1 OS=Rattus norvegicus OX=10116 GN=Ankrd1 PE=4 SV=1	11	1.181	1.161	1.038	0.89	1.025	0.89	0.995	0.774	1.046	1.012	0.24	0.22	0.05	-0.17	0.04	-0.17	-0.01	-0.37	0.06	0.02
D4A0Y4	Oxidoreductase NAD-binding domain containing 1 OS=Rattus norvegicus OX=10116 GN=Oxnad1 PE=1 SV=1	7	0.83	0.698	1.013	0.861	0.972	0.741	1.072	0.883	1.038	1.136	-0.27	-0.52	0.02	-0.22	-0.04	-0.43	0.1	-0.18	0.05	0.18
A0A8L2R0L1	Cold shock domain containing E1 OS=Rattus norvegicus OX=10116 GN=Csde1 PE=1 SV=1	15	0.997	1.327	0.915	0.999	0.932	1.067	0.979	1.052	0.977	0.924	0	0.41	-0.13	0	-0.1	0.09	-0.03	0.07	-0.03	-0.11
A0A8I6ARZ8	Intersectin 1 OS=Rattus norvegicus OX=10116 GN=Itsn1 PE=1 SV=1	13	1.058	1.347	0.883	1.047	1.074	1.226	0.976	1.036	0.983	0.94	0.08	0.43	-0.18	0.07	0.1	0.29	-0.04	0.05	-0.02	-0.09
Q02759	Polyunsaturated fatty acid lipoxygenase ALOX15 OS=Rattus norvegicus OX=10116 GN=Alox15 PE=1 SV=3	9	0.744	0.993	0.96	1.176	0.855	2.77	0.887	0.952	0.933	0.722	-0.43	-0.01	-0.06	0.23	-0.23	1.47	-0.17	-0.07	-0.1	-0.47
A0A8I5ZZK9	Crystallin, lambda 1 OS=Rattus norvegicus OX=10116 GN=Cryl1 PE=1 SV=1	7	0.975	0.898	1.009	1.109	1.086	0.877	1.056	1.153	1.007	0.983	-0.04	-0.16	0.01	0.15	0.12	-0.19	0.08	0.21	0.01	-0.02
A0A8I5ZNH9	Septin 9 OS=Rattus norvegicus OX=10116 GN=Septin9 PE=1 SV=1	10	0.986	1.089	0.938	1.039	1.063	1.132	1.069	1.088	1.032	1.004	-0.02	0.12	-0.09	0.06	0.09	0.18	0.1	0.12	0.05	0.01
A0A8L2R544	D-2-hydroxyglutarate dehydrogenase OS=Rattus norvegicus OX=10116 GN=D2hgdh PE=1 SV=1	8	0.951	0.952	0.927	0.966	1.031	0.918	0.991	0.991	1.009	0.956	-0.07	-0.07	-0.11	-0.05	0.04	-0.12	-0.01	-0.01	0.01	-0.06
G3V7Y3	ATP synthase F1 subunit delta OS=Rattus norvegicus OX=10116 GN=Atp5f1d PE=3 SV=2	3	1.008	0.749	1.027	1.037	1.134	0.674	1.134	1.069	1.076	1.053	0.01	-0.42	0.04	0.05	0.18	-0.57	0.18	0.1	0.11	0.08
A0A8I6A726	Epidermal growth factor receptor pathway substrate 15-like 1 OS=Rattus norvegicus OX=10116 GN=Eps15l1 PE=1 SV=1	12	0.951	1.032	1.021	0.996	1.041	1.138	1.053	1.06	1.089	1.095	-0.07	0.05	0.03	-0.01	0.06	0.19	0.07	0.08	0.12	0.13
P05370	Glucose-6-phosphate 1-dehydrogenase OS=Rattus norvegicus OX=10116 GN=G6pdx PE=1 SV=3	12	0.89	1.193	0.856	0.965	0.914	1.774	0.953	1.001	0.986	0.876	-0.17	0.26	-0.22	-0.05	-0.13	0.83	-0.07	0	-0.02	-0.19
A0A8L2PYP2	C-reactive protein OS=Rattus norvegicus OX=10116 GN=Crp PE=1 SV=1	6	0.871	1.311	0.769	1.036	0.861	1.816	0.968	0.989	1.014	0.785	-0.2	0.39	-0.38	0.05	-0.22	0.86	-0.05	-0.02	0.02	-0.35
P43278	Histone H1.0 OS=Rattus norvegicus OX=10116 GN=H1-0 PE=2 SV=2	9	1.402	1.272	1.136	1.485	0.914	1.388	0.751	1.068	0.663	0.65	0.49	0.35	0.18	0.57	-0.13	0.47	-0.41	0.09	-0.59	-0.62
Q5XIJ4	Protein FAM210A OS=Rattus norvegicus OX=10116 GN=Fam210a PE=2 SV=1	6	0.779	0.682	0.99	0.879	0.991	0.658	1.011	0.862	0.98	1.153	-0.36	-0.55	-0.01	-0.19	-0.01	-0.6	0.02	-0.21	-0.03	0.21
Q8CFN2	Cell division control protein 42 homolog OS=Rattus norvegicus OX=10116 GN=Cdc42 PE=1 SV=2	6	0.844	1.011	0.995	0.96	0.98	1.179	0.991	0.998	0.985	1.03	-0.24	0.02	-0.01	-0.06	-0.03	0.24	-0.01	0	-0.02	0.04
D3ZLA3	Copine 3 OS=Rattus norvegicus OX=10116 GN=Cpne3 PE=1 SV=1	10	0.972	0.993	1.061	0.993	1.004	0.981	0.939	0.953	1.029	1.018	-0.04	-0.01	0.09	-0.01	0.01	-0.03	-0.09	-0.07	0.04	0.03
A0A8I6A7E7	V-type proton ATPase proteolipid subunit OS=Rattus norvegicus OX=10116 GN=Atp6v0c PE=1 SV=1	3	0.499	0.451	0.973	0.766	1.3	0.807	1.041	0.78	0.801	0.88	-1	-1.15	-0.04	-0.38	0.38	-0.31	0.06	-0.36	-0.32	-0.19
F1LMQ3	26S proteasome non-ATPase regulatory subunit 8 OS=Rattus norvegicus OX=10116 GN=Psmd8 PE=1 SV=1	10	0.901	0.979	0.999	0.96	1.042	1.1	1.011	0.996	1.033	1.035	-0.15	-0.03	0	-0.06	0.06	0.14	0.02	-0.01	0.05	0.05
A0A8I6A8X0	Cytochrome c oxidase subunit OS=Rattus norvegicus OX=10116 GN=Cox6b1 PE=1 SV=1	7	0.882	0.607	1.294	0.911	0.949	0.69	1.062	0.915	1.035	1.386	-0.18	-0.72	0.37	-0.13	-0.08	-0.54	0.09	-0.13	0.05	0.47
A0A0G2K0T6	Gamma-synuclein OS=Rattus norvegicus OX=10116 GN=Sncg PE=1 SV=1	9	1.492	1.206	1.237	1.268	1.038	1.344	1.163	1.331	1.206	1.128	0.58	0.27	0.31	0.34	0.05	0.43	0.22	0.41	0.27	0.17
Q63563	ATP-binding cassette sub-family C member 9 OS=Rattus norvegicus OX=10116 GN=Abcc9 PE=1 SV=1	10	0.97	0.989	0.994	1.03	1.117	0.987	1.079	1.006	1.06	1.017	-0.04	-0.02	-0.01	0.04	0.16	-0.02	0.11	0.01	0.08	0.02
G3V8F5	Translocase of outer mitochondrial membrane 40 OS=Rattus norvegicus OX=10116 GN=Tomm40 PE=1 SV=1	7	0.922	0.909	0.977	0.985	0.989	0.881	1.037	1.037	1.056	1.031	-0.12	-0.14	-0.03	-0.02	-0.02	-0.18	0.05	0.05	0.08	0.04
P43138	DNA-(apurinic or apyrimidinic site) endonuclease OS=Rattus norvegicus OX=10116 GN=Apex1 PE=1 SV=2	7	0.975	1.019	0.936	1.041	0.986	0.905	0.906	0.987	0.987	0.917	-0.04	0.03	-0.1	0.06	-0.02	-0.14	-0.14	-0.02	-0.02	-0.12
A1L1L9	RGD1563224 protein OS=Rattus norvegicus OX=10116 GN=Tmem65 PE=2 SV=1	7	0.958	0.809	1.03	1.071	1.067	0.742	1.059	1.176	1.05	1.188	-0.06	-0.31	0.04	0.1	0.09	-0.43	0.08	0.23	0.07	0.25
A0A0G2JVL6	NADH dehydrogenase [ubiquinone] 1 alpha subcomplex subunit 8 OS=Rattus norvegicus OX=10116 GN=Ndufa8 PE=1 SV=1	7	0.971	0.648	1.128	0.907	0.988	0.651	0.947	0.955	0.956	1.074	-0.04	-0.63	0.17	-0.14	-0.02	-0.62	-0.08	-0.07	-0.06	0.1
A0A8I6ASL7	MAGUK p55 subfamily member 7 OS=Rattus norvegicus OX=10116 GN=Mpp7 PE=1 SV=1	10	0.973	0.92	1.099	0.998	1.099	0.909	1.073	1.075	1.115	1.099	-0.04	-0.12	0.14	0	0.14	-0.14	0.1	0.1	0.16	0.14
Q08290	Calponin-1 OS=Rattus norvegicus OX=10116 GN=Cnn1 PE=1 SV=1	9	0.694	1.533	0.637	0.767	0.682	3.76	0.752	1.022	0.739	0.65	-0.53	0.62	-0.65	-0.38	-0.55	1.91	-0.41	0.03	-0.44	-0.62
Q5BJU0	RAS related 2 OS=Rattus norvegicus OX=10116 GN=Rras2 PE=1 SV=1	8	0.743	0.629	1.035	0.88	0.989	0.605	1.039	0.883	1.04	1.092	-0.43	-0.67	0.05	-0.18	-0.02	-0.72	0.05	-0.18	0.06	0.13
D3ZM09	serine--tRNA ligase OS=Rattus norvegicus OX=10116 GN=Sars2 PE=1 SV=1	8	0.982	0.869	1.006	1.114	1.112	0.849	1.081	1.064	1.03	1.112	-0.03	-0.2	0.01	0.16	0.15	-0.24	0.11	0.09	0.04	0.15
Q6WN19	Reticulon-2 OS=Rattus norvegicus OX=10116 GN=Rtn2 PE=1 SV=1	5	1.006	1.245	0.888	1.064	1.049	0.948	0.98	1.076	0.979	0.915	0.01	0.32	-0.17	0.09	0.07	-0.08	-0.03	0.11	-0.03	-0.13
P60901	Proteasome subunit alpha type-6 OS=Rattus norvegicus OX=10116 GN=Psma6 PE=1 SV=1	8	0.924	1.113	1.163	1.079	1.057	1.161	1.316	1.043	1.223	1.246	-0.11	0.16	0.22	0.11	0.08	0.22	0.4	0.06	0.29	0.32
A0A8L2Q9C5	Tumor susceptibility 101 OS=Rattus norvegicus OX=10116 GN=Tsg101 PE=1 SV=1	7	0.96	1.031	0.996	1	1.02	1.117	1.004	0.957	1.011	1.081	-0.06	0.04	-0.01	0	0.03	0.16	0.01	-0.06	0.02	0.11
D4ACL2	Tetratricopeptide repeat protein 38 OS=Rattus norvegicus OX=10116 GN=Ttc38 PE=1 SV=2	13	0.974	0.888	0.929	0.985	1.007	1.349	1.049	1.475	1.053	1.464	-0.04	-0.17	-0.11	-0.02	0.01	0.43	0.07	0.56	0.07	0.55
A0A8I6AHC5	Acetyl-CoA acyltransferase 1A OS=Rattus norvegicus OX=10116 GN=Acaa1a PE=1 SV=1	9	0.955	1.071	0.887	1.047	1.058	1.159	1.002	1.05	0.951	0.92	-0.07	0.1	-0.17	0.07	0.08	0.21	0	0.07	-0.07	-0.12
E9PST5	Apoptotic chromatin condensation inducer 1 OS=Rattus norvegicus OX=10116 GN=Acin1 PE=1 SV=1	9	0.902	1.091	0.926	0.922	1.094	0.977	1.112	1.067	1.094	1.056	-0.15	0.13	-0.11	-0.12	0.13	-0.03	0.15	0.09	0.13	0.08
D4A1A5	Serine/threonine-protein phosphatase 2A 56 kDa regulatory subunit OS=Rattus norvegicus OX=10116 GN=Ppp2r5c PE=1 SV=2	11	0.831	0.845	0.856	0.974	1.045	0.956	0.967	0.988	0.933	0.906	-0.27	-0.24	-0.22	-0.04	0.06	-0.07	-0.05	-0.02	-0.1	-0.14
A0A8I5ZQG4	Ribosomal protein L24 OS=Rattus norvegicus OX=10116 GN=Rpl24 PE=1 SV=1	6	0.71	0.71	1.076	0.826	0.94	0.696	1.065	1.002	1.087	1.2	-0.49	-0.5	0.11	-0.28	-0.09	-0.52	0.09	0	0.12	0.26
Q5U216	ATP-dependent RNA helicase DDX39A OS=Rattus norvegicus OX=10116 GN=Ddx39a PE=2 SV=1	10	3.643	2.587	1.01	1.142	1.033	1.086	0.758	0.62	0.63	0.519	1.86	1.37	0.01	0.19	0.05	0.12	-0.4	-0.69	-0.67	-0.95
Q66H15	Regulator of microtubule dynamics protein 3 OS=Rattus norvegicus OX=10116 GN=Rmdn3 PE=1 SV=1	8	0.991	1.123	0.935	0.949	0.975	1.263	0.987	1.064	1.001	0.911	-0.01	0.17	-0.1	-0.08	-0.04	0.34	-0.02	0.09	0	-0.13
A0A096MJT0	Calcyclin-binding protein OS=Rattus norvegicus OX=10116 GN=Cacybp PE=1 SV=2	6	0.839	1.257	1.261	0.916	0.89	0.84	0.926	0.94	0.938	0.864	-0.25	0.33	0.33	-0.13	-0.17	-0.25	-0.11	-0.09	-0.09	-0.21
A0A0G2JWK2	Methyl-CpG-binding protein 2 OS=Rattus norvegicus OX=10116 GN=Mecp2 PE=1 SV=1	7	1.074	1.112	1.481	1.111	1.049	1.173	1.012	1.136	0.932	0.895	0.1	0.15	0.57	0.15	0.07	0.23	0.02	0.18	-0.1	-0.16
A0A8I6GIA0	40S ribosomal protein S13 OS=Rattus norvegicus OX=10116 GN=Rps13 PE=1 SV=1	8	0.96	0.98	1.024	0.997	1.018	0.722	1.045	1.005	0.99	1.012	-0.06	-0.03	0.03	0	0.03	-0.47	0.06	0.01	-0.01	0.02
Q5I0E7	Transmembrane emp24 domain-containing protein 9 OS=Rattus norvegicus OX=10116 GN=Tmed9 PE=1 SV=1	6	0.985	1.469	0.785	1.002	0.935	1.393	0.927	0.932	0.927	0.797	-0.02	0.55	-0.35	0	-0.1	0.48	-0.11	-0.1	-0.11	-0.33
P52555	Endoplasmic reticulum resident protein 29 OS=Rattus norvegicus OX=10116 GN=Erp29 PE=1 SV=2	8	0.955	1.273	0.902	1.014	1.043	1.217	1.033	0.996	1.031	0.97	-0.07	0.35	-0.15	0.02	0.06	0.28	0.05	-0.01	0.04	-0.04
A0A0A0MY07	Ubiquitin carboxyl-terminal hydrolase OS=Rattus norvegicus OX=10116 GN=Usp15 PE=1 SV=2	12	1.014	1.154	0.915	1.06	0.982	1.083	1.045	1.101	1.034	0.91	0.02	0.21	-0.13	0.08	-0.03	0.12	0.06	0.14	0.05	-0.14
D3ZM33	40S ribosomal protein S18 OS=Rattus norvegicus OX=10116 GN=LOC100362298 PE=3 SV=4	10	0.996	1.06	1.014	1.059	1.028	0.826	1.034	1.104	1.035	1.023	-0.01	0.08	0.02	0.08	0.04	-0.28	0.05	0.14	0.05	0.03
Q5PQK2	FUS RNA binding protein OS=Rattus norvegicus OX=10116 GN=Fus PE=1 SV=1	6	0.947	1.016	1.016	1.025	1.039	0.881	0.979	1.019	1.002	1.072	-0.08	0.02	0.02	0.04	0.06	-0.18	-0.03	0.03	0	0.1
Q5M9G9	FAST kinase domain-containing protein 4 OS=Rattus norvegicus OX=10116 GN=Tbrg4 PE=2 SV=1	9	0.841	0.862	0.961	0.953	0.989	0.875	1.079	0.961	1.028	1.086	-0.25	-0.21	-0.06	-0.07	-0.02	-0.19	0.11	-0.06	0.04	0.12
A0A8I5Y9A4	NADH dehydrogenase [ubiquinone] 1 beta subcomplex subunit 3 OS=Rattus norvegicus OX=10116 GN=Ndufb3 PE=1 SV=1	4	1.015	0.931	0.946	1.032	1.053	0.86	1.027	1.005	1	0.95	0.02	-0.1	-0.08	0.05	0.07	-0.22	0.04	0.01	0	-0.07
Q5U2Q7	Eukaryotic peptide chain release factor subunit 1 OS=Rattus norvegicus OX=10116 GN=Etf1 PE=2 SV=3	7	0.933	1.121	1.058	1.031	1.093	1.035	1.175	1.037	1.186	1.109	-0.1	0.16	0.08	0.04	0.13	0.05	0.23	0.05	0.25	0.15
P11730	Calcium/calmodulin-dependent protein kinase type II subunit gamma OS=Rattus norvegicus OX=10116 GN=Camk2g PE=1 SV=1	8	0.83	1.073	0.933	0.932	0.997	1.003	0.968	0.973	0.959	1.003	-0.27	0.1	-0.1	-0.1	-0.01	0	-0.05	-0.04	-0.06	0
Q5XIK2	Thioredoxin-related transmembrane protein 2 OS=Rattus norvegicus OX=10116 GN=Tmx2 PE=2 SV=1	9	0.953	0.931	0.99	1.023	1.087	0.906	1.015	1.03	1.02	1.008	-0.07	-0.1	-0.01	0.03	0.12	-0.14	0.02	0.04	0.03	0.01
O08618	Phosphoribosyl pyrophosphate synthase-associated protein 2 OS=Rattus norvegicus OX=10116 GN=Prpsap2 PE=1 SV=1	8	0.964	1.039	0.917	0.974	0.975	1.071	0.969	1.01	1.149	0.95	-0.05	0.06	-0.12	-0.04	-0.04	0.1	-0.05	0.01	0.2	-0.07
A0A0G2JUX4	Ubiquitin carboxyl-terminal hydrolase 47 OS=Rattus norvegicus OX=10116 GN=Usp47 PE=1 SV=2	11	1.032	1.188	0.992	1.024	1.05	0.955	1.088	1.12	1.14	1.018	0.05	0.25	-0.01	0.03	0.07	-0.07	0.12	0.16	0.19	0.03
A0A8I6A9Z6	UBX domain protein 1 OS=Rattus norvegicus OX=10116 GN=Ubxn1 PE=1 SV=1	9	0.873	0.998	0.86	0.986	0.977	1.008	0.924	0.974	0.975	0.948	-0.2	0	-0.22	-0.02	-0.03	0.01	-0.11	-0.04	-0.04	-0.08
D3ZCA0	Pyridoxal phosphate homeostasis protein OS=Rattus norvegicus OX=10116 GN=Plpbp PE=1 SV=1	7	0.88	0.928	0.993	0.995	1.006	0.833	1.054	1.085	1.036	1.128	-0.18	-0.11	-0.01	-0.01	0.01	-0.26	0.08	0.12	0.05	0.17
D4A0E8	Protein arginine N-methyltransferase 5 OS=Rattus norvegicus OX=10116 GN=Prmt5 PE=1 SV=1	11	0.917	1.244	0.805	1.016	0.943	1.268	0.957	1.022	0.959	0.833	-0.13	0.31	-0.31	0.02	-0.08	0.34	-0.06	0.03	-0.06	-0.26
A0A0H2UI35	Homer protein homolog 1 OS=Rattus norvegicus OX=10116 GN=Homer1 PE=1 SV=1	10	1.174	1.111	0.916	1.003	1.041	0.769	1.004	1.033	0.998	1.014	0.23	0.15	-0.13	0	0.06	-0.38	0.01	0.05	0	0.02
A0A8I6AAE7	Paxillin OS=Rattus norvegicus OX=10116 GN=Pxn PE=1 SV=1	8	0.901	0.832	1.031	0.967	1.08	1.036	1.084	0.976	1.057	1.086	-0.15	-0.27	0.04	-0.05	0.11	0.05	0.12	-0.04	0.08	0.12
D3ZAZ0	Eukaryotic translation initiation factor 3 subunit M OS=Rattus norvegicus OX=10116 GN=Eif3m PE=3 SV=2	7	0.65	0.681	0.979	0.796	0.993	0.696	1.012	0.799	0.967	1.077	-0.62	-0.55	-0.03	-0.33	-0.01	-0.52	0.02	-0.32	-0.05	0.11
A0A8I5ZQB3	WASH complex subunit 2C OS=Rattus norvegicus OX=10116 GN=Washc2c PE=1 SV=1	13	0.979	1.034	0.915	1.005	1.08	1.04	1.019	1.019	1.047	1.038	-0.03	0.05	-0.13	0.01	0.11	0.06	0.03	0.03	0.07	0.05
A0A8I5Y7L4	DNA topoisomerase 2 OS=Rattus norvegicus OX=10116 GN=Top2b PE=1 SV=1	11	0.963	0.905	0.959	0.905	0.986	1.065	1.019	1.083	1.003	1.003	-0.05	-0.14	-0.06	-0.14	-0.02	0.09	0.03	0.12	0	0
G3V8W2	Phosphatidate cytidylyltransferase OS=Rattus norvegicus OX=10116 GN=Cds2 PE=1 SV=1	7	0.764	0.861	0.916	0.791	0.981	1.034	0.997	0.987	1.03	1.068	-0.39	-0.22	-0.13	-0.34	-0.03	0.05	0	-0.02	0.04	0.1
F7FJ14	PC4 and SFRS1 interacting protein 1 OS=Rattus norvegicus OX=10116 GN=Psip1 PE=1 SV=1	8	0.837	1.014	0.921	0.892	0.945	0.962	0.892	0.913	0.925	0.975	-0.26	0.02	-0.12	-0.16	-0.08	-0.06	-0.16	-0.13	-0.11	-0.04
A0A8I6GHX2	Cytochrome c oxidase subunit 7A2 like OS=Rattus norvegicus OX=10116 GN=Cox7a2l PE=1 SV=1	7	0.958	0.819	1.008	0.967	1.013	0.608	0.998	0.966	0.935	0.934	-0.06	-0.29	0.01	-0.05	0.02	-0.72	0	-0.05	-0.1	-0.1
Q71UF4	Histone-binding protein RBBP7 OS=Rattus norvegicus OX=10116 GN=Rbbp7 PE=2 SV=1	6	0.979	1.107	0.947	0.961	1.024	1.023	1.023	1.024	0.979	0.973	-0.03	0.15	-0.08	-0.06	0.03	0.03	0.03	0.03	-0.03	-0.04
A0A8I5YC26	Methylmalonyl CoA epimerase OS=Rattus norvegicus OX=10116 GN=Mcee PE=1 SV=1	5	0.814	0.571	0.984	0.906	1.02	0.729	1.046	0.833	0.989	1.129	-0.3	-0.81	-0.02	-0.14	0.03	-0.46	0.06	-0.26	-0.02	0.17
Q8CHK8	Apoptosis-associated speck-like protein OS=Rattus norvegicus OX=10116 GN=Pycard PE=2 SV=1	6	1.021	0.822	1.004	0.935	1.049	0.903	1.099	0.971	1.217	1.147	0.03	-0.28	0.01	-0.1	0.07	-0.15	0.14	-0.04	0.28	0.2
A0A8I6ASB9	Myosin 1C OS=Rattus norvegicus OX=10116 GN=Myo1c PE=1 SV=1	9	1.073	1.331	0.847	0.965	0.951	1.263	0.925	0.976	0.942	0.867	0.1	0.41	-0.24	-0.05	-0.07	0.34	-0.11	-0.03	-0.09	-0.21
D3ZD73	RNA helicase OS=Rattus norvegicus OX=10116 GN=Ddx6 PE=1 SV=1	7	0.938	1.011	0.98	0.983	1.03	0.962	1.051	1.017	1.02	0.976	-0.09	0.02	-0.03	-0.02	0.04	-0.06	0.07	0.02	0.03	-0.04
P20762	Ig gamma-2C chain C region OS=Rattus norvegicus OX=10116 PE=2 SV=1	9	1.025	1.7	0.758	0.911	0.923	1.02	0.896	1.078	1.082	0.936	0.04	0.77	-0.4	-0.13	-0.11	0.03	-0.16	0.11	0.11	-0.1
F1M9Y9	RNA binding protein, mRNA processing factor OS=Rattus norvegicus OX=10116 GN=Rbpms PE=1 SV=2	8	0.961	1.133	0.925	0.992	1.007	1.165	0.913	0.979	0.907	0.931	-0.06	0.18	-0.11	-0.01	0.01	0.22	-0.13	-0.03	-0.14	-0.1
P61227	Ras-related protein Rap-2b OS=Rattus norvegicus OX=10116 GN=Rap2b PE=2 SV=1	7	0.894	1.226	0.924	0.998	1.03	1.194	0.951	1.011	0.999	0.961	-0.16	0.29	-0.11	0	0.04	0.26	-0.07	0.02	0	-0.06
Q68FQ5	Mitochondrial translational initiation factor 2 OS=Rattus norvegicus OX=10116 GN=Mtif2 PE=1 SV=1	11	0.964	1.023	0.975	1.045	1.027	0.993	1.02	1.059	0.988	0.981	-0.05	0.03	-0.04	0.06	0.04	-0.01	0.03	0.08	-0.02	-0.03
F1M7F7	Complement component C6 OS=Rattus norvegicus OX=10116 GN=C6 PE=1 SV=4	9	0.888	1.19	0.875	0.976	0.931	1.387	1.026	1.088	1.078	0.854	-0.17	0.25	-0.19	-0.04	-0.1	0.47	0.04	0.12	0.11	-0.23
Q0D2L2	Mitochondrial ribosomal protein S22 OS=Rattus norvegicus OX=10116 GN=Mrps22 PE=1 SV=1	10	0.891	0.94	0.935	1.009	1.04	0.909	1.021	1.017	1.043	0.987	-0.17	-0.09	-0.1	0.01	0.06	-0.14	0.03	0.02	0.06	-0.02
A0A0G2K785	glycerol kinase OS=Rattus norvegicus OX=10116 GN=Gk PE=1 SV=1	10	1.097	0.877	1.04	1.033	1.034	0.854	1.036	1.083	1.067	1.132	0.13	-0.19	0.06	0.05	0.05	-0.23	0.05	0.12	0.09	0.18
A0A8I6A356	E2 ubiquitin-conjugating enzyme OS=Rattus norvegicus OX=10116 GN=Ube2k PE=1 SV=1	7	0.994	0.909	0.999	1.044	1.076	0.854	1.041	0.955	1.004	1.01	-0.01	-0.14	0	0.06	0.11	-0.23	0.06	-0.07	0.01	0.01
A0A0G2JYE0	Ataxin 2-like OS=Rattus norvegicus OX=10116 GN=Atxn2l PE=1 SV=1	11	1.063	0.975	0.992	1.019	1.108	0.967	1.015	0.999	1.007	1.032	0.09	-0.04	-0.01	0.03	0.15	-0.05	0.02	0	0.01	0.05
Q5M9G8	DDB1- and CUL4-associated factor 11 OS=Rattus norvegicus OX=10116 GN=Dcaf11 PE=1 SV=1	8	0.879	0.821	0.986	0.964	1.068	1.033	1.058	1.025	1.05	1.072	-0.19	-0.28	-0.02	-0.05	0.09	0.05	0.08	0.04	0.07	0.1
A0A0G2K2M2	Mitochondrial fission factor OS=Rattus norvegicus OX=10116 GN=Mff PE=1 SV=1	7	1.102	1.129	1.022	1.114	1.138	0.969	1.022	1.056	1.089	0.92	0.14	0.17	0.03	0.16	0.19	-0.05	0.03	0.08	0.12	-0.12
A0A8I6A9X7	ADP ribosylation factor like GTPase 3 OS=Rattus norvegicus OX=10116 GN=Arl3 PE=1 SV=1	8	0.955	1.069	1.008	1.104	1.096	1.118	1.041	0.992	0.955	1.037	-0.07	0.1	0.01	0.14	0.13	0.16	0.06	-0.01	-0.07	0.05
P62076	Mitochondrial import inner membrane translocase subunit Tim13 OS=Rattus norvegicus OX=10116 GN=Timm13 PE=3 SV=1	4	1.006	0.984	0.931	1.038	1.079	0.975	1.029	1.06	1.039	0.977	0.01	-0.02	-0.1	0.05	0.11	-0.04	0.04	0.08	0.06	-0.03
G3V647	Pyridoxal kinase OS=Rattus norvegicus OX=10116 GN=Pdxk PE=1 SV=1	7	0.857	0.944	0.947	1.017	1.033	0.972	1.019	0.959	0.989	1.017	-0.22	-0.08	-0.08	0.02	0.05	-0.04	0.03	-0.06	-0.02	0.02
Q5PPJ6	leucine--tRNA ligase OS=Rattus norvegicus OX=10116 GN=Lars1 PE=1 SV=1	11	1.076	1.288	0.963	1.138	1.175	1.04	1.13	1.085	1.091	1.065	0.11	0.37	-0.05	0.19	0.23	0.06	0.18	0.12	0.13	0.09
A0A8I6AYD3	Glutathione synthetase OS=Rattus norvegicus OX=10116 GN=Gss PE=1 SV=1	10	1.122	1.171	1.011	1.087	1.07	1.1	0.929	1.015	0.925	0.878	0.17	0.23	0.02	0.12	0.1	0.14	-0.11	0.02	-0.11	-0.19
D3ZUV3	Eukaryotic translation initiation factor 2A OS=Rattus norvegicus OX=10116 GN=Eif2a PE=1 SV=4	9	0.976	1	0.975	1.043	1.092	1.13	1.01	1.067	1.029	0.99	-0.04	0	-0.04	0.06	0.13	0.18	0.01	0.09	0.04	-0.01
A0A8I6AUY4	Mitochondrial ribosomal protein S30 OS=Rattus norvegicus OX=10116 GN=Mrps30 PE=1 SV=1	10	1.096	1.108	0.877	1.057	0.954	0.843	0.954	1.014	0.979	0.922	0.13	0.15	-0.19	0.08	-0.07	-0.25	-0.07	0.02	-0.03	-0.12
A0A8L2Q1A7	Nitrilase 1 OS=Rattus norvegicus OX=10116 GN=Nit1 PE=1 SV=1	8	0.94	0.978	0.869	1.004	0.995	0.976	0.959	0.966	0.953	0.88	-0.09	-0.03	-0.2	0.01	-0.01	-0.03	-0.06	-0.05	-0.07	-0.19
D4A8C5	1-phosphatidylinositol 4,5-bisphosphate phosphodiesterase OS=Rattus norvegicus OX=10116 GN=Plcb4 PE=1 SV=2	13	1.013	1.179	0.947	1.049	1.142	1.023	1.013	1.102	1.012	0.935	0.02	0.24	-0.08	0.07	0.19	0.03	0.02	0.14	0.02	-0.1
Q5RKH5	Phosphorylase b kinase regulatory subunit OS=Rattus norvegicus OX=10116 GN=Phkb PE=1 SV=1	10	0.771	0.962	0.907	0.808	0.997	0.885	0.894	0.953	0.97	0.998	-0.38	-0.06	-0.14	-0.31	0	-0.18	-0.16	-0.07	-0.04	0
A0A8I5Y7T7	Serine/threonine-protein phosphatase OS=Rattus norvegicus OX=10116 GN=Ppp3ca PE=1 SV=1	8	1.029	1.195	0.926	1.041	1.021	0.998	0.991	1.019	1.004	0.929	0.04	0.26	-0.11	0.06	0.03	0	-0.01	0.03	0.01	-0.11
A0A0G2JTX5	Dipeptidyl peptidase 4 OS=Rattus norvegicus OX=10116 GN=Dpp4 PE=1 SV=2	10	0.855	0.753	0.902	0.965	1.049	0.843	1.011	0.987	0.996	1.061	-0.23	-0.41	-0.15	-0.05	0.07	-0.25	0.02	-0.02	-0.01	0.09
A0A8L2UL04	Calcium/calmodulin-dependent protein kinase I OS=Rattus norvegicus OX=10116 GN=Camk1 PE=1 SV=1	6	0.918	1.166	0.948	0.903	1.029	1.251	1.032	1.008	1.025	0.984	-0.12	0.22	-0.08	-0.15	0.04	0.32	0.05	0.01	0.04	-0.02
Q4QQV8	Charged multivesicular body protein 5 OS=Rattus norvegicus OX=10116 GN=Chmp5 PE=2 SV=1	6	0.792	1.501	0.916	0.891	0.887	1.623	1.045	1.088	1.092	0.949	-0.34	0.59	-0.13	-0.17	-0.17	0.7	0.06	0.12	0.13	-0.07
D3ZL85	Holocytochrome c-type synthase OS=Rattus norvegicus OX=10116 GN=Hccs PE=1 SV=1	9	0.906	0.853	1.092	0.997	0.977	0.866	1	0.955	1.027	1.078	-0.14	-0.23	0.13	0	-0.03	-0.21	0	-0.07	0.04	0.11
M0R6Z9	Myosin XVIIIb OS=Rattus norvegicus OX=10116 GN=Myo18b PE=1 SV=3	10	1.057	0.753	1.065	1.034	1.095	0.833	1.123	1.055	1.077	1.065	0.08	-0.41	0.09	0.05	0.13	-0.26	0.17	0.08	0.11	0.09
A0A0G2JVK4	Neurolysin OS=Rattus norvegicus OX=10116 GN=Nln PE=1 SV=2	9	0.962	1.078	0.965	0.977	1.087	0.978	1.082	1.027	1.086	1.064	-0.06	0.11	-0.05	-0.03	0.12	-0.03	0.11	0.04	0.12	0.09
Q3B7U9	Peptidyl-prolyl cis-trans isomerase FKBP8 OS=Rattus norvegicus OX=10116 GN=Fkbp8 PE=2 SV=1	7	1.125	0.979	1.002	1.02	0.994	0.859	0.986	1.042	1.019	1.038	0.17	-0.03	0	0.03	-0.01	-0.22	-0.02	0.06	0.03	0.05
F1M7B8	Ubiquitin-protein ligase E3A OS=Rattus norvegicus OX=10116 GN=Ube3a PE=1 SV=2	11	1.066	1.156	0.968	1.03	1	0.911	1.013	1.089	1.041	0.961	0.09	0.21	-0.05	0.04	0	-0.13	0.02	0.12	0.06	-0.06
D3ZV91	trans-L-3-hydroxyproline dehydratase OS=Rattus norvegicus OX=10116 GN=L3hypdh PE=1 SV=1	6	1.006	1.207	0.937	1.033	1.022	1.087	0.984	1.008	1.025	0.967	0.01	0.27	-0.09	0.05	0.03	0.12	-0.02	0.01	0.04	-0.05
A0A8I6AI52	Carboxypeptidase OS=Rattus norvegicus OX=10116 GN=Scpep1 PE=1 SV=1	8	0.843	1.084	0.89	0.965	1.01	1.243	0.906	0.958	0.892	0.921	-0.25	0.12	-0.17	-0.05	0.01	0.31	-0.14	-0.06	-0.17	-0.12
B0BNB2	Density-regulated protein OS=Rattus norvegicus OX=10116 GN=Denr PE=2 SV=1	7	0.871	0.982	0.865	0.903	0.968	1.103	1.039	0.997	1.028	0.987	-0.2	-0.03	-0.21	-0.15	-0.05	0.14	0.05	0	0.04	-0.02
Q5RJK5	Chromobox 3 OS=Rattus norvegicus OX=10116 GN=Cbx3 PE=1 SV=1	6	1.004	0.995	1.019	0.879	0.928	1.199	1.056	0.98	1.061	1.146	0.01	-0.01	0.03	-0.19	-0.11	0.26	0.08	-0.03	0.09	0.2
A0A0G2K4R1	Protein phosphatase 1 regulatory subunit OS=Rattus norvegicus OX=10116 GN=Ppp1r12c PE=1 SV=1	12	0.904	1.217	0.925	0.987	0.98	1.296	0.981	1.003	1.001	0.982	-0.15	0.28	-0.11	-0.02	-0.03	0.37	-0.03	0	0	-0.03
D3Z8L7	Ras-related protein R-Ras OS=Rattus norvegicus OX=10116 GN=Rras PE=1 SV=1	8	0.87	1.002	1.032	0.996	0.978	1.078	1.027	0.974	1.026	1.055	-0.2	0	0.04	-0.01	-0.03	0.11	0.04	-0.04	0.04	0.08
P62828	GTP-binding nuclear protein Ran OS=Rattus norvegicus OX=10116 GN=Ran PE=1 SV=3	6	0.713	1.117	0.988	0.895	0.923	1.15	1.081	1.054	1.099	0.975	-0.49	0.16	-0.02	-0.16	-0.12	0.2	0.11	0.08	0.14	-0.04
C0HLM6	Small integral membrane protein 20 OS=Rattus norvegicus OX=10116 GN=Smim20 PE=1 SV=1	4	0.771	0.574	0.878	0.856	1.058	0.528	0.888	0.878	0.88	0.773	-0.37	-0.8	-0.19	-0.22	0.08	-0.92	-0.17	-0.19	-0.19	-0.37
A0A8I5Y4S4	ENAH, actin regulator OS=Rattus norvegicus OX=10116 GN=Enah PE=1 SV=1	11	0.996	1.239	0.944	1.007	1.073	1.374	1.03	0.997	1.08	1.014	-0.01	0.31	-0.08	0.01	0.1	0.46	0.04	0	0.11	0.02
D3ZUY0	Retinol dehydrogenase 14 OS=Rattus norvegicus OX=10116 GN=Rdh14 PE=1 SV=1	8	1.059	1.571	0.951	1.02	0.962	0.992	1.01	1.076	1.036	0.974	0.08	0.65	-0.07	0.03	-0.06	-0.01	0.01	0.11	0.05	-0.04
A0A8L2R1F7	HRas proto-oncogene, GTPase OS=Rattus norvegicus OX=10116 GN=Hras PE=1 SV=1	6	0.991	0.974	0.953	0.97	1.035	0.964	0.993	0.966	1.012	1.04	-0.01	-0.04	-0.07	-0.04	0.05	-0.05	-0.01	-0.05	0.02	0.06
Q5RJR8	Leucine-rich repeat-containing protein 59 OS=Rattus norvegicus OX=10116 GN=Lrrc59 PE=1 SV=1	8	0.916	1.283	0.848	0.95	0.953	1.233	0.948	0.916	0.961	0.905	-0.13	0.36	-0.24	-0.07	-0.07	0.3	-0.08	-0.13	-0.06	-0.14
A0A8I6A1F9	Sugar phosphate phosphatase OS=Rattus norvegicus OX=10116 GN=Armt1 PE=1 SV=1	11	0.815	0.909	1.034	0.958	1.043	0.751	1.079	1.053	1.055	1.096	-0.3	-0.14	0.05	-0.06	0.06	-0.41	0.11	0.07	0.08	0.13
A0A8I5ZWC6	Importin subunit alpha OS=Rattus norvegicus OX=10116 GN=Kpna3 PE=1 SV=1	7	0.974	0.924	0.934	1.052	1.09	0.833	1.038	0.996	1.012	0.95	-0.04	-0.11	-0.1	0.07	0.12	-0.26	0.05	-0.01	0.02	-0.07
P00787	Cathepsin B OS=Rattus norvegicus OX=10116 GN=Ctsb PE=1 SV=2	7	0.855	1.17	1.012	0.951	0.997	1.215	1.017	0.967	1.038	1.052	-0.23	0.23	0.02	-0.07	0	0.28	0.02	-0.05	0.05	0.07
B6DYQ9	glutathione transferase OS=Rattus norvegicus OX=10116 GN=Gstt2 PE=2 SV=1	7	0.832	0.892	0.993	0.952	1.063	0.96	1.035	1.051	1.041	1.033	-0.27	-0.16	-0.01	-0.07	0.09	-0.06	0.05	0.07	0.06	0.05
Q5I0M1	Beta-2-glycoprotein 1 OS=Rattus norvegicus OX=10116 GN=Apoh PE=1 SV=1	7	0.632	0.779	0.847	0.806	0.843	2.811	0.915	0.89	0.968	0.909	-0.66	-0.36	-0.24	-0.31	-0.25	1.49	-0.13	-0.17	-0.05	-0.14
P25409	Alanine aminotransferase 1 OS=Rattus norvegicus OX=10116 GN=Gpt PE=1 SV=2	9	0.966	1.082	0.943	1.07	1.057	1.025	1.026	1.122	1.018	0.927	-0.05	0.11	-0.08	0.1	0.08	0.04	0.04	0.17	0.03	-0.11
A0A8I6GJG8	Inositol polyphosphate-1-phosphatase OS=Rattus norvegicus OX=10116 GN=Inpp1 PE=1 SV=1	8	0.904	0.976	0.923	0.965	1.057	0.981	1.03	1.055	1.039	0.997	-0.15	-0.04	-0.11	-0.05	0.08	-0.03	0.04	0.08	0.06	0
A0A8I5ZWI2	V-type proton ATPase subunit H OS=Rattus norvegicus OX=10116 GN=Atp6v1h PE=1 SV=1	6	1.038	1.256	0.916	1.016	1.035	1.037	1.002	1.056	1.076	1.006	0.05	0.33	-0.13	0.02	0.05	0.05	0	0.08	0.11	0.01
S4VP54	MAP2K4delta OS=Rattus norvegicus OX=10116 GN=Map2k4 PE=1 SV=1	8	0.907	1.046	0.975	0.906	1.045	0.881	1.024	1.032	1.077	1.085	-0.14	0.06	-0.04	-0.14	0.06	-0.18	0.03	0.05	0.11	0.12
A0A8L2R7U6	Proteasome subunit beta OS=Rattus norvegicus OX=10116 GN=Psmb3 PE=1 SV=1	7	1.071	1.307	0.94	1.043	0.958	0.928	1.02	1.03	1.006	0.893	0.1	0.39	-0.09	0.06	-0.06	-0.11	0.03	0.04	0.01	-0.16
D4ADG2	Iron-sulfur cluster assembly factor IBA57 OS=Rattus norvegicus OX=10116 GN=Iba57 PE=1 SV=1	7	0.977	0.973	0.987	1.058	1.064	0.905	1.103	1.035	1.059	1.017	-0.03	-0.04	-0.02	0.08	0.09	-0.14	0.14	0.05	0.08	0.02
A0A8I6A289	Histone H3 OS=Rattus norvegicus OX=10116 GN=LOC108349691 PE=3 SV=1	10	0.537	0.417	1.268	1.108	0.93	1.777	0.825	1.145	0.83	0.781	-0.9	-1.26	0.34	0.15	-0.1	0.83	-0.28	0.2	-0.27	-0.36
A0A8I6APK7	Family with sequence similarity 114, member A2 OS=Rattus norvegicus OX=10116 GN=Fam114a2 PE=1 SV=1	7	0.901	0.78	0.947	0.957	1.042	0.751	1.011	0.92	0.938	0.819	-0.15	-0.36	-0.08	-0.06	0.06	-0.41	0.02	-0.12	-0.09	-0.29
D3ZGS5	Uveal autoantigen with coiled-coil domains and ankyrin repeats OS=Rattus norvegicus OX=10116 GN=Uaca PE=1 SV=2	13	1.077	1.499	0.857	1.145	0.918	1.417	1.029	1.454	1.058	0.884	0.11	0.58	-0.22	0.19	-0.12	0.5	0.04	0.54	0.08	-0.18
D3ZZX1	Inositol polyphosphate-5-phosphatase A OS=Rattus norvegicus OX=10116 GN=Inpp5a PE=1 SV=1	7	0.865	0.72	0.953	1.003	1.097	0.788	1.084	0.965	1.053	1.098	-0.21	-0.47	-0.07	0.01	0.13	-0.34	0.12	-0.05	0.07	0.13
M0R681	Leiomodin 2 OS=Rattus norvegicus OX=10116 GN=Lmod2 PE=1 SV=1	11	1.376	0.896	1.079	1.18	1.096	0.646	0.934	1.03	0.958	0.864	0.46	-0.16	0.11	0.24	0.13	-0.63	-0.1	0.04	-0.06	-0.21
B0BN81	Ribosomal protein S5 OS=Rattus norvegicus OX=10116 GN=Rps5 PE=1 SV=1	7	0.977	1.024	1.113	0.997	0.999	0.774	0.958	0.971	0.956	1.116	-0.03	0.03	0.15	0	0	-0.37	-0.06	-0.04	-0.06	0.16
Q5EBA1	ATP-dependent RNA helicase SUPV3L1, mitochondrial OS=Rattus norvegicus OX=10116 GN=Supv3l1 PE=2 SV=1	11	0.9	0.928	0.973	0.972	1.001	1.024	1.014	1	1.057	1.052	-0.15	-0.11	-0.04	-0.04	0	0.03	0.02	0	0.08	0.07
A0A8I6ANC4	Coronin OS=Rattus norvegicus OX=10116 GN=Coro1c PE=1 SV=1	9	1.089	1.353	0.756	1	0.79	2.62	0.869	1.04	0.898	0.736	0.12	0.44	-0.4	0	-0.34	1.39	-0.2	0.06	-0.15	-0.44
Q78P75	Dynein light chain 2, cytoplasmic OS=Rattus norvegicus OX=10116 GN=Dynll2 PE=1 SV=1	6	0.944	0.875	1.022	1.028	0.997	0.826	1.005	0.986	0.941	1.008	-0.08	-0.19	0.03	0.04	-0.01	-0.28	0.01	-0.02	-0.09	0.01
A0A8I6AHN4	E3 ubiquitin-protein ligase OS=Rattus norvegicus OX=10116 GN=Trip12 PE=1 SV=1	11	1.104	1.336	0.814	0.992	1.043	0.879	1.032	1.193	1.057	0.774	0.14	0.42	-0.3	-0.01	0.06	-0.19	0.05	0.25	0.08	-0.37
A1L122	NEDD8-activating enzyme E1 regulatory subunit OS=Rattus norvegicus OX=10116 GN=Nae1 PE=1 SV=1	9	1.023	1.046	1.039	1.059	1.076	1.029	1.117	1.105	1.081	1.125	0.03	0.06	0.06	0.08	0.11	0.04	0.16	0.14	0.11	0.17
B1WBY1	Cul1 protein OS=Rattus norvegicus OX=10116 GN=Cul1 PE=2 SV=1	12	0.949	0.955	0.98	0.978	1.039	0.922	1.057	1.044	1.072	1.014	-0.08	-0.07	-0.03	-0.03	0.05	-0.12	0.08	0.06	0.1	0.02
P08289	Alkaline phosphatase, tissue-nonspecific isozyme OS=Rattus norvegicus OX=10116 GN=Alpl PE=1 SV=2	11	0.852	1.095	0.867	0.986	0.971	1.251	0.929	1.088	0.962	0.955	-0.23	0.13	-0.21	-0.02	-0.04	0.32	-0.11	0.12	-0.06	-0.07
B2RZ78	Vacuolar protein sorting-associated protein 29 OS=Rattus norvegicus OX=10116 GN=Vps29 PE=1 SV=2	8	0.985	1.052	0.906	0.928	0.97	0.993	1.008	0.973	0.982	0.983	-0.02	0.07	-0.14	-0.11	-0.04	-0.01	0.01	-0.04	-0.03	-0.02
D3ZGE6	Cortactin OS=Rattus norvegicus OX=10116 GN=Cttn PE=1 SV=4	9	0.973	1.098	0.98	1.074	1.021	1.138	0.994	1.037	1.018	1.042	-0.04	0.13	-0.03	0.1	0.03	0.19	-0.01	0.05	0.03	0.06
A0A8I5ZJD7	RAB6A, member RAS oncogene family OS=Rattus norvegicus OX=10116 GN=Rab6a PE=1 SV=1	6	0.987	1.003	0.938	1.037	1.123	0.916	1.098	0.991	1.023	0.883	-0.02	0	-0.09	0.05	0.17	-0.13	0.13	-0.01	0.03	-0.18
Q8K4T4	Filamin-A-interacting protein 1 OS=Rattus norvegicus OX=10116 GN=Filip1 PE=1 SV=1	9	1.31	0.859	1.194	1.075	1.144	0.694	0.991	1.042	1.083	1.089	0.39	-0.22	0.26	0.1	0.19	-0.53	-0.01	0.06	0.11	0.12
A0A0G2K277	Enoyl-Coenzyme A delta isomerase 3 OS=Rattus norvegicus OX=10116 GN=Eci3 PE=1 SV=2	4	1.087	1.167	0.957	1.038	1.023	0.853	0.977	1.054	1.036	0.864	0.12	0.22	-0.06	0.05	0.03	-0.23	-0.03	0.08	0.05	-0.21
D3ZN95	Host cell factor 1 OS=Rattus norvegicus OX=10116 GN=Hcfc1 PE=1 SV=1	9	1.04	1	0.977	0.943	1.004	0.997	0.96	0.977	0.983	0.983	0.06	0	-0.03	-0.08	0.01	0	-0.06	-0.03	-0.03	-0.02
A0A8L2QD42	Sorbitol dehydrogenase OS=Rattus norvegicus OX=10116 GN=Sord PE=1 SV=1	8	0.911	0.876	0.958	0.971	1.04	0.888	0.987	1.021	1.031	1.077	-0.13	-0.19	-0.06	-0.04	0.06	-0.17	-0.02	0.03	0.04	0.11
G3V7Z3	Nucleolar protein 3 OS=Rattus norvegicus OX=10116 GN=Nol3 PE=1 SV=1	6	0.82	0.942	0.778	0.814	0.971	1.073	1.042	0.928	1.116	1.133	-0.29	-0.09	-0.36	-0.3	-0.04	0.1	0.06	-0.11	0.16	0.18
D3ZRM0	Dual specificity phosphatase 27, atypical OS=Rattus norvegicus OX=10116 GN=Styxl2 PE=1 SV=1	9	1.102	1.117	1.014	0.985	1.019	0.856	0.911	1.011	0.956	0.903	0.14	0.16	0.02	-0.02	0.03	-0.23	-0.13	0.02	-0.07	-0.15
D3ZAF6	ATP synthase subunit f, mitochondrial OS=Rattus norvegicus OX=10116 GN=Atp5mf PE=1 SV=1	5	0.88	0.79	0.935	0.922	1.027	0.634	0.967	0.941	1.001	1.003	-0.18	-0.34	-0.1	-0.12	0.04	-0.66	-0.05	-0.09	0	0
A0A8I6A304	Brain abundant, membrane attached signal protein 1 OS=Rattus norvegicus OX=10116 GN=Basp1 PE=1 SV=1	5	0.454	0.984	0.509	0.804	0.55	5.907	0.607	1.079	0.624	0.454	-1.14	-0.02	-0.97	-0.31	-0.86	2.56	-0.72	0.11	-0.68	-1.14
A0A8I6GI40	UBA domain containing 1 OS=Rattus norvegicus OX=10116 GN=Ubac1 PE=1 SV=1	8	0.703	0.805	0.86	0.853	1.034	0.975	0.949	0.89	0.953	0.859	-0.51	-0.31	-0.22	-0.23	0.05	-0.04	-0.08	-0.17	-0.07	-0.22
A0A0G2K6Y9	Syntaxin 7 OS=Rattus norvegicus OX=10116 GN=Stx7 PE=1 SV=2	6	0.811	0.917	0.97	0.905	0.971	0.975	1.03	0.961	1.001	1.033	-0.3	-0.12	-0.04	-0.14	-0.04	-0.04	0.04	-0.06	0	0.05
F7EPV5	60S ribosomal protein L28 OS=Rattus norvegicus OX=10116 GN=Rpl28 PE=1 SV=1	7	0.782	1.005	1.039	0.97	1.036	1.206	1.105	1.161	1.067	1.048	-0.36	0.01	0.05	-0.04	0.05	0.27	0.14	0.22	0.09	0.07
P47820	Angiotensin-converting enzyme OS=Rattus norvegicus OX=10116 GN=Ace PE=1 SV=1	8	0.948	1.164	0.779	1.051	1.024	1.154	1.175	0.981	1.085	0.812	-0.08	0.22	-0.36	0.07	0.03	0.21	0.23	-0.03	0.12	-0.3
P35280	Ras-related protein Rab-8A OS=Rattus norvegicus OX=10116 GN=Rab8a PE=1 SV=2	9	1.007	1.287	1.126	1.173	1.133	1.292	1.238	1.127	1.271	1.172	0.01	0.36	0.17	0.23	0.18	0.37	0.31	0.17	0.35	0.23
A0A8I5ZW23	Tubulin-specific chaperone A OS=Rattus norvegicus OX=10116 GN=Tbca PE=1 SV=1	6	0.7	0.754	1.002	0.806	0.961	1.215	1.164	0.901	1.126	1.249	-0.51	-0.41	0	-0.31	-0.06	0.28	0.22	-0.15	0.17	0.32
A0A0G2K2Y9	Plexin B2 OS=Rattus norvegicus OX=10116 GN=Plxnb2 PE=1 SV=1	11	0.982	1.368	0.868	0.98	0.963	1.21	0.996	0.975	0.984	0.88	-0.03	0.45	-0.2	-0.03	-0.05	0.27	-0.01	-0.04	-0.02	-0.18
Q5U2R7	LRP chaperone MESD OS=Rattus norvegicus OX=10116 GN=Mesd PE=2 SV=1	7	0.95	1.246	0.862	0.948	0.97	1.192	0.929	0.974	0.977	0.9	-0.07	0.32	-0.21	-0.08	-0.04	0.25	-0.11	-0.04	-0.03	-0.15
A0A8L2UJ95	PDZ and LIM domain 7 OS=Rattus norvegicus OX=10116 GN=Pdlim7 PE=1 SV=1	9	0.891	1.505	0.804	0.918	0.816	2.869	0.877	1.088	0.833	0.8	-0.17	0.59	-0.31	-0.12	-0.29	1.52	-0.19	0.12	-0.26	-0.32
F7FBS0	Biphenyl hydrolase like OS=Rattus norvegicus OX=10116 GN=Bphl PE=1 SV=1	8	0.859	0.846	0.926	0.915	1.015	1.027	0.981	0.973	0.979	0.978	-0.22	-0.24	-0.11	-0.13	0.02	0.04	-0.03	-0.04	-0.03	-0.03
A0A0G2JZH0	Calcium binding protein 39 OS=Rattus norvegicus OX=10116 GN=Cab39 PE=1 SV=1	9	0.987	1.015	0.992	1.05	1.039	0.904	1.032	0.987	0.966	0.972	-0.02	0.02	-0.01	0.07	0.05	-0.15	0.05	-0.02	-0.05	-0.04
P56603	Secretory carrier-associated membrane protein 1 OS=Rattus norvegicus OX=10116 GN=Scamp1 PE=1 SV=1	6	0.973	1.701	0.912	0.97	0.963	0.926	0.964	1	0.935	0.876	-0.04	0.77	-0.13	-0.04	-0.05	-0.11	-0.05	0	-0.1	-0.19
A0A0H2UHQ1	60S ribosomal protein L17 OS=Rattus norvegicus OX=10116 GN=Rpl17 PE=3 SV=1	8	0.746	0.857	1.043	0.922	0.988	0.833	1.081	1.084	1.073	1.11	-0.42	-0.22	0.06	-0.12	-0.02	-0.26	0.11	0.12	0.1	0.15
A0A8I6A955	Bis(5'-adenosyl)-triphosphatase OS=Rattus norvegicus OX=10116 GN=Fhit PE=1 SV=1	5	0.97	1.079	0.912	1.052	0.984	1.239	0.988	1.046	1.024	0.959	-0.04	0.11	-0.13	0.07	-0.02	0.31	-0.02	0.06	0.03	-0.06
A0A8I6ASU1	procollagen-proline 4-dioxygenase OS=Rattus norvegicus OX=10116 GN=P4ha1 PE=1 SV=1	10	1.014	1.108	1.005	1.042	1.043	1.182	1.048	1.045	1.014	1.011	0.02	0.15	0.01	0.06	0.06	0.24	0.07	0.06	0.02	0.02
Q6P3E1	Rps16 protein (Fragment) OS=Rattus norvegicus OX=10116 GN=Rps16 PE=2 SV=1	9	0.699	0.748	1.042	0.945	1.022	0.726	1.03	0.94	1.031	1.15	-0.52	-0.42	0.06	-0.08	0.03	-0.46	0.04	-0.09	0.04	0.2
A0A8L2R849	Proteasome subunit beta OS=Rattus norvegicus OX=10116 GN=Psmb7 PE=1 SV=1	6	0.84	1.028	0.928	0.974	1.029	0.972	0.982	0.991	0.989	1.028	-0.25	0.04	-0.11	-0.04	0.04	-0.04	-0.03	-0.01	-0.02	0.04
B1WC26	N-acetylneuraminate synthase OS=Rattus norvegicus OX=10116 GN=Nans PE=1 SV=1	7	1.047	1.095	0.858	1.057	0.945	1	0.897	0.988	0.936	0.813	0.07	0.13	-0.22	0.08	-0.08	0	-0.16	-0.02	-0.1	-0.3
Q68FT7	Phenylalanine--tRNA ligase beta subunit OS=Rattus norvegicus OX=10116 GN=Farsb PE=1 SV=1	9	1.031	1.137	1.029	1.042	1.059	0.946	1.057	1.417	1.059	1.094	0.04	0.19	0.04	0.06	0.08	-0.08	0.08	0.5	0.08	0.13
F7F110	Alpha-2-glycoprotein 1, zinc-binding OS=Rattus norvegicus OX=10116 GN=Azgp1 PE=1 SV=1	7	0.836	1.19	0.829	0.918	0.813	1.812	0.928	1.017	1.02	0.884	-0.26	0.25	-0.27	-0.12	-0.3	0.86	-0.11	0.02	0.03	-0.18
P05964	Protein S100-A6 OS=Rattus norvegicus OX=10116 GN=S100a6 PE=1 SV=3	6	0.601	0.944	0.754	0.813	0.905	1.877	0.964	0.983	0.907	0.912	-0.73	-0.08	-0.41	-0.3	-0.14	0.91	-0.05	-0.02	-0.14	-0.13
F1MAA2	COP9 signalosome subunit 7A OS=Rattus norvegicus OX=10116 GN=Cops7a PE=1 SV=2	7	0.99	1.196	0.953	1.17	1.012	1.129	0.912	1.001	0.99	0.812	-0.01	0.26	-0.07	0.23	0.02	0.17	-0.13	0	-0.02	-0.3
D3ZQ59	Nardilysin convertase OS=Rattus norvegicus OX=10116 GN=Nrdc PE=1 SV=1	9	1.199	1.482	0.839	1.039	0.977	1.092	0.988	1.025	0.913	0.823	0.26	0.57	-0.25	0.06	-0.03	0.13	-0.02	0.04	-0.13	-0.28
A0A8I6AJE9	Integrin subunit alpha 6 OS=Rattus norvegicus OX=10116 GN=Itga6 PE=1 SV=1	10	1.29	1.733	0.834	1.132	0.961	1.017	0.96	1.063	0.977	0.68	0.37	0.79	-0.26	0.18	-0.06	0.02	-0.06	0.09	-0.03	-0.56
A0A8I6ARL3	Phosphatidylinositol transfer protein, beta OS=Rattus norvegicus OX=10116 GN=Pitpnb PE=1 SV=1	9	0.857	1.03	0.936	0.951	0.985	1.084	1.043	0.987	1.009	1.032	-0.22	0.04	-0.1	-0.07	-0.02	0.12	0.06	-0.02	0.01	0.05
A0A8I6ATU9	Ataxin 2 OS=Rattus norvegicus OX=10116 GN=Atxn2 PE=1 SV=1	8	1.066	0.895	1.238	1.094	1.081	0.856	1.02	1.047	0.958	1.001	0.09	-0.16	0.31	0.13	0.11	-0.22	0.03	0.07	-0.06	0
A0A0G2JSR4	Signal transducer and activator of transcription OS=Rattus norvegicus OX=10116 GN=Stat5b PE=1 SV=2	8	0.816	1.219	0.918	0.984	0.999	1.296	1.042	1.119	1.034	0.998	-0.29	0.29	-0.12	-0.02	0	0.37	0.06	0.16	0.05	0
A0A8I5Y1E6	NADH dehydrogenase [ubiquinone] 1 beta subcomplex subunit 2, mitochondrial OS=Rattus norvegicus OX=10116 GN=Adck2 PE=1 SV=1	3	0.755	0.53	0.844	0.739	1.019	0.521	0.975	0.803	0.94	0.954	-0.41	-0.91	-0.24	-0.44	0.03	-0.94	-0.04	-0.32	-0.09	-0.07
D4AAB5	Xaa-Arg dipeptidase OS=Rattus norvegicus OX=10116 GN=Pm20d2 PE=3 SV=1	9	1.134	1.119	0.965	1.081	1.014	0.863	1.021	1.044	1.009	0.909	0.18	0.16	-0.05	0.11	0.02	-0.21	0.03	0.06	0.01	-0.14
P70583	Deoxyuridine 5'-triphosphate nucleotidohydrolase OS=Rattus norvegicus OX=10116 GN=Dut PE=2 SV=3	7	1.119	0.943	1.146	1.073	1.06	0.879	1.011	1.035	1.045	1.036	0.16	-0.09	0.2	0.1	0.08	-0.19	0.02	0.05	0.06	0.05
Q4AEG6	Bone morphogenetic protein 10 OS=Rattus norvegicus OX=10116 GN=Bmp10 PE=2 SV=1	7	0.819	3.154	0.682	0.96	0.709	2.924	0.729	1.026	0.714	0.642	-0.29	1.66	-0.55	-0.06	-0.5	1.55	-0.46	0.04	-0.49	-0.64
A0A8I6A790	Chloride intracellular channel protein OS=Rattus norvegicus OX=10116 GN=Clic1 PE=1 SV=1	4	0.844	0.958	0.982	0.88	0.991	1.21	1.012	0.931	1.035	1.083	-0.25	-0.06	-0.03	-0.18	-0.01	0.27	0.02	-0.1	0.05	0.12
F1LRY5	RCG45398 OS=Rattus norvegicus OX=10116 GN=Sardh PE=1 SV=2	10	1.15	0.876	1.027	0.943	1.059	0.828	1.01	0.956	1.009	1.169	0.2	-0.19	0.04	-0.09	0.08	-0.27	0.01	-0.06	0.01	0.22
A0A8I6GH88	peptidylprolyl isomerase OS=Rattus norvegicus OX=10116 GN=Fkbp2 PE=1 SV=1	7	0.841	1.062	0.902	1.011	0.983	1.304	0.96	0.96	1.009	1.062	-0.25	0.09	-0.15	0.02	-0.03	0.38	-0.06	-0.06	0.01	0.09
A0A8L2R9H0	40S ribosomal protein S8 OS=Rattus norvegicus OX=10116 GN=Rps8 PE=3 SV=1	5	0.709	0.641	1.118	0.912	1.052	0.751	1.08	1.129	1.098	1.199	-0.5	-0.64	0.16	-0.13	0.07	-0.41	0.11	0.17	0.13	0.26
A0A8I6A7Q8	Voltage-dependent L-type calcium channel subunit beta-2 OS=Rattus norvegicus OX=10116 GN=Cacnb2 PE=3 SV=1	8	1.181	1.038	0.979	0.989	0.964	1.099	0.983	1.042	0.981	0.934	0.24	0.05	-0.03	-0.02	-0.05	0.14	-0.02	0.06	-0.03	-0.1
P62870	Elongin-B OS=Rattus norvegicus OX=10116 GN=Elob PE=1 SV=1	6	0.887	1.01	0.999	0.98	1.063	0.937	1.058	1.001	1.03	1.066	-0.17	0.01	0	-0.03	0.09	-0.09	0.08	0	0.04	0.09
A0A8I6G659	Histone H2A OS=Rattus norvegicus OX=10116 GN=H2az2 PE=3 SV=1	6	1.107	1.219	0.991	1.119	0.834	1.195	0.945	1.097	0.835	0.671	0.15	0.29	-0.01	0.16	-0.26	0.26	-0.08	0.13	-0.26	-0.58
A0A8I5Y5T4	Crystallin zeta OS=Rattus norvegicus OX=10116 GN=Cryz PE=1 SV=1	7	0.87	1.047	1.016	1.054	1.042	1.117	1.01	0.984	0.98	1.015	-0.2	0.07	0.02	0.08	0.06	0.16	0.01	-0.02	-0.03	0.02
B1WC67	RCG29001 OS=Rattus norvegicus OX=10116 GN=Slc25a24 PE=2 SV=1	9	1.112	1.116	0.956	0.978	1.054	1.25	0.944	0.983	0.989	0.945	0.15	0.16	-0.07	-0.03	0.08	0.32	-0.08	-0.02	-0.02	-0.08
P60123	RuvB-like 1 OS=Rattus norvegicus OX=10116 GN=Ruvbl1 PE=1 SV=1	7	1.084	0.954	0.948	0.957	1.045	1.041	0.936	1.064	0.981	0.941	0.12	-0.07	-0.08	-0.06	0.06	0.06	-0.1	0.09	-0.03	-0.09
A0A8I6GD73	Ribosomal protein L18 OS=Rattus norvegicus OX=10116 GN=Rpl18 PE=1 SV=1	6	0.682	0.888	0.997	0.967	0.99	0.818	1.075	1.03	1.051	1.097	-0.55	-0.17	0	-0.05	-0.01	-0.29	0.1	0.04	0.07	0.13
Q63159	Ubiquinone biosynthesis O-methyltransferase, mitochondrial OS=Rattus norvegicus OX=10116 GN=Coq3 PE=2 SV=2	7	0.92	0.829	1.037	0.995	1.074	0.69	1.052	0.969	1.015	1.009	-0.12	-0.27	0.05	-0.01	0.1	-0.54	0.07	-0.05	0.02	0.01
D3ZY50	ATP synthase mitochondrial F1 complex assembly factor 1 OS=Rattus norvegicus OX=10116 GN=Atpaf1 PE=1 SV=1	8	0.952	0.98	0.907	1.024	1.061	0.875	1.003	0.97	1.003	1.029	-0.07	-0.03	-0.14	0.03	0.09	-0.19	0	-0.04	0	0.04
Q642A4	UPF0598 protein C8orf82 homolog OS=Rattus norvegicus OX=10116 PE=2 SV=1	5	0.974	0.769	1.013	0.982	1.035	1.114	0.99	0.986	1.015	1.074	-0.04	-0.38	0.02	-0.03	0.05	0.16	-0.01	-0.02	0.02	0.1
D4AB17	phosphoribosylformylglycinamidine synthase OS=Rattus norvegicus OX=10116 GN=Pfas PE=1 SV=4	9	1.004	1.35	0.859	1.062	1.019	1.38	0.977	1.074	1.014	0.912	0.01	0.43	-0.22	0.09	0.03	0.46	-0.03	0.1	0.02	-0.13
Q5XIT1	Microtubule-associated protein RP/EB family member 3 OS=Rattus norvegicus OX=10116 GN=Mapre3 PE=1 SV=1	9	0.867	1.002	0.913	1.004	1.065	0.976	1.011	0.928	0.981	0.978	-0.21	0	-0.13	0.01	0.09	-0.03	0.02	-0.11	-0.03	-0.03
B5DFN3	Ubiquinol-cytochrome-c reductase complex assembly factor 2 OS=Rattus norvegicus OX=10116 GN=Uqcc2 PE=2 SV=1	5	1.027	0.904	1.125	1.097	1.166	0.675	1.167	1.051	1.001	1.036	0.04	-0.15	0.17	0.13	0.22	-0.57	0.22	0.07	0	0.05
Q6AYR1	RCG52996, isoform CRA_a OS=Rattus norvegicus OX=10116 GN=Tfg PE=1 SV=1	5	0.901	1.226	0.941	1.033	1.119	1.206	1.042	1.122	1.023	0.973	-0.15	0.29	-0.09	0.05	0.16	0.27	0.06	0.17	0.03	-0.04
M0R4H5	PDZ and LIM domain 4 OS=Rattus norvegicus OX=10116 GN=Pdlim4 PE=1 SV=1	8	0.91	1.147	0.972	1.006	1.097	1.057	1.075	1.044	1.034	0.96	-0.14	0.2	-0.04	0.01	0.13	0.08	0.1	0.06	0.05	-0.06
Q8VHK7	Hepatoma-derived growth factor OS=Rattus norvegicus OX=10116 GN=Hdgf PE=1 SV=2	6	0.874	1.074	1.005	0.942	0.955	1.152	1.186	1.042	1.285	1.421	-0.19	0.1	0.01	-0.09	-0.07	0.2	0.25	0.06	0.36	0.51
Q80WI8	ADP/ATP translocase (Fragment) OS=Rattus sp OX=10118 PE=2 SV=1	6	1.013	1.052	0.917	1.094	0.966	1.067	0.945	1.077	1.122	1.189	0.02	0.07	-0.12	0.13	-0.05	0.09	-0.08	0.11	0.17	0.25
D3ZB81	ADP/ATP translocase OS=Rattus norvegicus OX=10116 GN=Slc25a31 PE=3 SV=4	6	0.963	0.896	0.943	1.039	1.208	0.891	1.07	1.028	1.095	1.088	-0.06	-0.16	-0.09	0.06	0.27	-0.17	0.1	0.04	0.13	0.12
Q6AYD4	Endothelial cell-selective adhesion molecule OS=Rattus norvegicus OX=10116 GN=Esam PE=1 SV=1	5	1.003	0.839	1.038	0.983	1.086	0.854	1.031	1.027	1.007	1.036	0	-0.25	0.05	-0.02	0.12	-0.23	0.04	0.04	0.01	0.05
B1WC32	SUMO-activating enzyme subunit 2 OS=Rattus norvegicus OX=10116 GN=Uba2 PE=2 SV=1	8	0.724	0.766	0.883	0.886	1.081	0.828	0.898	0.852	0.879	0.901	-0.47	-0.38	-0.18	-0.18	0.11	-0.27	-0.16	-0.23	-0.19	-0.15
A0A8I5ZM56	MAP7 domain containing 1 OS=Rattus norvegicus OX=10116 GN=Map7d1 PE=1 SV=1	11	1.03	0.974	0.981	1.032	1.055	1.047	1.082	1.055	0.991	0.992	0.04	-0.04	-0.03	0.05	0.08	0.07	0.11	0.08	-0.01	-0.01
Q9JMJ4	Pre-mRNA-processing factor 19 OS=Rattus norvegicus OX=10116 GN=Prpf19 PE=1 SV=2	8	0.951	1.297	0.865	0.991	0.952	1.366	0.983	1.118	1.043	0.928	-0.07	0.37	-0.21	-0.01	-0.07	0.45	-0.02	0.16	0.06	-0.11
A0A8I6G961	Choline transporter-like protein OS=Rattus norvegicus OX=10116 GN=Slc44a2 PE=1 SV=1	10	0.99	0.934	1.027	0.984	1.061	0.827	1.045	0.991	1.03	1.069	-0.02	-0.1	0.04	-0.02	0.09	-0.27	0.06	-0.01	0.04	0.1
A0A0G2JXT3	Farnesyl pyrophosphate synthase OS=Rattus norvegicus OX=10116 GN=Fdps PE=1 SV=1	10	1.319	1.009	1.04	1.035	1.014	1.147	0.915	0.95	0.968	0.944	0.4	0.01	0.06	0.05	0.02	0.2	-0.13	-0.07	-0.05	-0.08
Q9WVB1	Ras-related protein Rab-6A OS=Rattus norvegicus OX=10116 GN=Rab6a PE=1 SV=2	6	0.927	1.442	0.876	0.933	0.982	1.359	1.001	0.959	0.923	0.893	-0.11	0.53	-0.19	-0.1	-0.03	0.44	0	-0.06	-0.12	-0.16
Q9QYQ0	A2q (Fragment) OS=Rattus norvegicus OX=10116 GN=RT1-A2q PE=2 SV=1	6	0.982	0.775	0.857	0.97	1.063	0.608	1.058	0.887	1.105	1.138	-0.03	-0.37	-0.22	-0.04	0.09	-0.72	0.08	-0.17	0.14	0.19
A0A8I6ADP8	Malignant T-cell-amplified sequence OS=Rattus norvegicus OX=10116 GN=Mcts1 PE=1 SV=1	5	0.97	1.196	0.93	0.944	0.91	0.993	0.957	0.901	0.953	0.956	-0.04	0.26	-0.1	-0.08	-0.14	-0.01	-0.06	-0.15	-0.07	-0.06
A0A8I6A902	Methionine aminopeptidase 2 OS=Rattus norvegicus OX=10116 GN=Metap2 PE=1 SV=1	8	0.968	0.963	1.021	0.977	1.035	0.847	1.117	1.036	1.064	1.071	-0.05	-0.05	0.03	-0.03	0.05	-0.24	0.16	0.05	0.09	0.1
A0A0G2K0B2	Erythrocyte membrane protein band 4.1-like 1 OS=Rattus norvegicus OX=10116 GN=Epb41l1 PE=1 SV=2	10	0.838	1.24	0.914	0.856	0.941	1.367	1.025	0.978	0.847	0.826	-0.26	0.31	-0.13	-0.23	-0.09	0.45	0.04	-0.03	-0.24	-0.28
Q5U2Q8	Asph protein OS=Rattus norvegicus OX=10116 GN=Asph PE=2 SV=1	7	0.966	0.573	1.124	1.041	1.129	0.489	1.079	1.001	1.064	1.13	-0.05	-0.8	0.17	0.06	0.18	-1.03	0.11	0	0.09	0.18
D3ZWA8	Adaptor protein, phosphotyrosine interacting with PH domain and leucine zipper 1 OS=Rattus norvegicus OX=10116 GN=Appl1 PE=1 SV=4	8	0.884	1.123	0.93	0.957	1.024	1.136	1.04	1.259	1.059	1.246	-0.18	0.17	-0.1	-0.06	0.03	0.18	0.06	0.33	0.08	0.32
A0A0G2K7G7	Septin OS=Rattus norvegicus OX=10116 GN=Septin8 PE=1 SV=1	8	0.871	1.02	0.954	1.053	1.136	1.292	1.108	1.089	1.092	1.237	-0.2	0.03	-0.07	0.07	0.18	0.37	0.15	0.12	0.13	0.31
A0A8L2QEE4	Inositol-1-monophosphatase OS=Rattus norvegicus OX=10116 GN=Impa2 PE=1 SV=1	7	0.971	0.985	0.9	1.055	1.07	0.873	0.998	1.103	1.037	0.88	-0.04	-0.02	-0.15	0.08	0.1	-0.2	0	0.14	0.05	-0.18
Q5XIC2	Evolutionarily conserved signaling intermediate in Toll pathway, mitochondrial OS=Rattus norvegicus OX=10116 GN=Ecsit PE=1 SV=1	8	0.888	0.769	0.916	0.961	1.054	0.906	1.053	0.959	0.957	1.006	-0.17	-0.38	-0.13	-0.06	0.08	-0.14	0.07	-0.06	-0.06	0.01
A0A8I5ZN14	ATP binding cassette subfamily D member 3 OS=Rattus norvegicus OX=10116 GN=Abcd3 PE=1 SV=1	8	0.925	0.791	0.979	0.874	1.088	0.815	1.053	1.06	1.143	1.201	-0.11	-0.34	-0.03	-0.19	0.12	-0.3	0.08	0.08	0.19	0.26
A0A8I6G747	Prothymosin alpha OS=Rattus norvegicus OX=10116 GN=Ptma PE=1 SV=1	5	0.894	0.736	0.727	0.775	1.099	0.608	1.309	1.03	1.301	1.333	-0.16	-0.44	-0.46	-0.37	0.14	-0.72	0.39	0.04	0.38	0.41
A0A0G2KA12	Kinesin family member 1B OS=Rattus norvegicus OX=10116 GN=Kif1b PE=1 SV=2	7	1.051	1.489	1.084	1.099	1.092	1.314	1.089	1.117	1.1	1.022	0.07	0.57	0.12	0.14	0.13	0.39	0.12	0.16	0.14	0.03
A0A096MKG5	NAD kinase 2, mitochondrial OS=Rattus norvegicus OX=10116 GN=Nadk2 PE=1 SV=1	7	0.995	0.81	0.937	1.01	1.02	0.769	0.995	1.025	0.979	0.965	-0.01	-0.3	-0.09	0.01	0.03	-0.38	-0.01	0.04	-0.03	-0.05
A0A8I6AWQ6	AP-1 complex subunit mu-1 OS=Rattus norvegicus OX=10116 GN=Ap1m1 PE=1 SV=1	6	1.038	1.366	0.9	1.044	1.012	1.2	1.001	1.097	0.991	0.956	0.05	0.45	-0.15	0.06	0.02	0.26	0	0.13	-0.01	-0.06
Q99N27	Sorting nexin-1 OS=Rattus norvegicus OX=10116 GN=Snx1 PE=1 SV=1	8	0.821	1.088	0.821	0.931	0.928	1.492	0.899	0.962	0.961	0.853	-0.28	0.12	-0.28	-0.1	-0.11	0.58	-0.15	-0.06	-0.06	-0.23
B5DEN5	Elongation factor 1-beta OS=Rattus norvegicus OX=10116 GN=Eef1b2 PE=1 SV=1	7	0.691	0.866	0.976	0.716	0.845	1.046	1.052	0.916	1.097	1.231	-0.53	-0.21	-0.03	-0.48	-0.24	0.06	0.07	-0.13	0.13	0.3
B1WBW4	Armadillo repeat-containing protein 10 OS=Rattus norvegicus OX=10116 GN=Armc10 PE=1 SV=1	8	0.997	1.135	0.934	1.034	1.02	1.056	1.009	1.092	1.019	0.991	0	0.18	-0.1	0.05	0.03	0.08	0.01	0.13	0.03	-0.01
Q99MZ8	LIM and SH3 domain protein 1 OS=Rattus norvegicus OX=10116 GN=Lasp1 PE=1 SV=1	12	1.069	1.076	1.099	0.95	1.097	1.224	0.981	0.947	1.018	0.926	0.1	0.11	0.14	-0.07	0.13	0.29	-0.03	-0.08	0.03	-0.11
A0A8I5ZXT2	Dematin actin binding protein OS=Rattus norvegicus OX=10116 GN=Dmtn PE=1 SV=1	10	0.768	1.96	0.661	1.012	0.728	1.754	0.882	1.116	1.008	0.583	-0.38	0.97	-0.6	0.02	-0.46	0.81	-0.18	0.16	0.01	-0.78
F1LQI1	Hydroxyacyl glutathione hydrolase OS=Rattus norvegicus OX=10116 GN=Hagh PE=3 SV=3	7	0.87	0.839	1.145	0.998	0.942	1.051	0.988	0.963	1.074	1.119	-0.2	-0.25	0.2	0	-0.09	0.07	-0.02	-0.05	0.1	0.16
D3ZML4	Similar to RIKEN cDNA 5730502D15 gene (Predicted) OS=Rattus norvegicus OX=10116 GN=Trabd PE=1 SV=1	7	0.895	0.926	1.057	1.06	1.127	0.985	1.225	0.968	1.077	1.145	-0.16	-0.11	0.08	0.08	0.17	-0.02	0.29	-0.05	0.11	0.2
A0A8I5ZN75	Ubiquitin conjugating enzyme E2 V1 OS=Rattus norvegicus OX=10116 GN=LOC679539 PE=4 SV=1	8	0.928	1.206	0.959	0.984	1.022	1.219	1.07	1.026	1.091	1.012	-0.11	0.27	-0.06	-0.02	0.03	0.29	0.1	0.04	0.13	0.02
A0A8I6GBD2	Actin related protein 10 OS=Rattus norvegicus OX=10116 GN=Actr10 PE=1 SV=1	7	0.937	1.138	0.945	0.967	1.034	1.078	0.944	1.006	0.927	0.96	-0.09	0.19	-0.08	-0.05	0.05	0.11	-0.08	0.01	-0.11	-0.06
A0A8L2Q5X6	Phosphoglycolate phosphatase OS=Rattus norvegicus OX=10116 GN=Pgp PE=1 SV=1	6	0.892	0.919	0.933	0.996	1.049	1.025	1.067	1.021	1.041	1.085	-0.17	-0.12	-0.1	-0.01	0.07	0.04	0.09	0.03	0.06	0.12
A0A8I6ASY3	Anamorsin OS=Rattus norvegicus OX=10116 GN=Ciapin1 PE=1 SV=1	3	0.682	0.665	0.935	0.824	0.987	0.828	1.059	0.884	0.993	1.008	-0.55	-0.59	-0.1	-0.28	-0.02	-0.27	0.08	-0.18	-0.01	0.01
A0A8L2Q0A6	ATP synthase-coupling factor 6, mitochondrial OS=Rattus norvegicus OX=10116 GN=Atp5pf PE=1 SV=1	5	1.037	0.968	0.819	1.163	1.009	1.165	1.037	1.026	0.948	0.859	0.05	-0.05	-0.29	0.22	0.01	0.22	0.05	0.04	-0.08	-0.22
Q5FVM4	Non-POU domain-containing octamer-binding protein OS=Rattus norvegicus OX=10116 GN=Nono PE=1 SV=3	9	0.929	0.968	0.951	0.924	1.05	0.968	1.025	0.985	1.057	1.04	-0.11	-0.05	-0.07	-0.11	0.07	-0.05	0.04	-0.02	0.08	0.06
Q5XIW0	Mitochondrial import inner membrane translocase subunit TIM23 OS=Rattus norvegicus OX=10116 GN=Timm23-ps8 PE=2 SV=1	7	0.851	0.838	1.002	0.955	1.114	0.91	1.123	1.03	1.078	1.056	-0.23	-0.25	0	-0.07	0.16	-0.14	0.17	0.04	0.11	0.08
D2XV59	GTP-binding protein 1 OS=Rattus norvegicus OX=10116 GN=Gtpbp1 PE=1 SV=1	6	0.774	0.985	0.884	0.905	0.986	1.216	0.983	0.97	0.935	0.931	-0.37	-0.02	-0.18	-0.14	-0.02	0.28	-0.02	-0.04	-0.1	-0.1
Q08602	Geranylgeranyl transferase type-2 subunit alpha OS=Rattus norvegicus OX=10116 GN=Rabggta PE=1 SV=1	9	1.012	0.941	0.926	1.023	1.061	0.84	1.034	0.973	1.016	0.955	0.02	-0.09	-0.11	0.03	0.09	-0.25	0.05	-0.04	0.02	-0.07
F1LW07	Protein phosphatase 1, regulatory subunit 13 like OS=Rattus norvegicus OX=10116 GN=Ppp1r13l PE=1 SV=2	6	1	0.965	0.966	0.991	1.057	1.018	0.946	0.981	0.937	1.027	0	-0.05	-0.05	-0.01	0.08	0.03	-0.08	-0.03	-0.09	0.04
A0A8I5ZUB2	Organic solute carrier partner 1 OS=Rattus norvegicus OX=10116 GN=Oscp1 PE=3 SV=1	4	0.902	0.958	1.062	0.982	1.05	0.882	1.023	1.037	1.042	1.055	-0.15	-0.06	0.09	-0.03	0.07	-0.18	0.03	0.05	0.06	0.08
P0DN35	NADH dehydrogenase [ubiquinone] 1 beta subcomplex subunit 1 OS=Rattus norvegicus OX=10116 GN=Ndufb1 PE=3 SV=1	3	1.032	0.659	0.933	1.078	1.055	0.5	1.057	1.054	1.041	0.926	0.05	-0.6	-0.1	0.11	0.08	-1	0.08	0.08	0.06	-0.11
B2GUY4	Dematin actin binding protein OS=Rattus norvegicus OX=10116 GN=Dmtn PE=1 SV=1	10	1.124	1.578	0.781	1.045	0.783	1.414	0.887	1.151	0.965	0.741	0.17	0.66	-0.36	0.06	-0.35	0.5	-0.17	0.2	-0.05	-0.43
A0A8I5Y7I2	Potassium channel tetramerization domain containing 12 OS=Rattus norvegicus OX=10116 GN=Kctd12 PE=1 SV=1	6	1.167	1.299	0.887	1.077	0.951	1.403	0.985	1.107	1.021	0.911	0.22	0.38	-0.17	0.11	-0.07	0.49	-0.02	0.15	0.03	-0.13
A0A8I5ZXI2	Rho GDP dissociation inhibitor beta OS=Rattus norvegicus OX=10116 GN=Arhgdib PE=1 SV=1	6	0.806	1.173	0.895	1.008	0.979	1.158	0.935	0.962	0.961	0.973	-0.31	0.23	-0.16	0.01	-0.03	0.21	-0.1	-0.06	-0.06	-0.04
F1LPM9	TNNI3 interacting kinase OS=Rattus norvegicus OX=10116 GN=Tnni3k PE=4 SV=2	10	0.91	0.843	1.001	0.912	1.013	0.66	1.123	1.027	1.148	1.1	-0.14	-0.25	0	-0.13	0.02	-0.6	0.17	0.04	0.2	0.14
A0A0G2QC02	Ski2 like RNA helicase OS=Rattus norvegicus OX=10116 GN=Skic2 PE=1 SV=2	9	1.004	0.994	1.027	1.003	1.112	0.836	1.038	0.995	1.084	1.081	0.01	-0.01	0.04	0	0.15	-0.26	0.05	-0.01	0.12	0.11
Q9Z272	ARF GTPase-activating protein GIT1 OS=Rattus norvegicus OX=10116 GN=Git1 PE=1 SV=1	8	1.033	1.079	0.922	1.031	0.991	1.034	1.001	1.001	1.036	0.956	0.05	0.11	-0.12	0.04	-0.01	0.05	0	0	0.05	-0.06
Q04970	GTPase NRas OS=Rattus norvegicus OX=10116 GN=Nras PE=1 SV=1	6	1	1.163	1.1	0.86	1.144	1.023	0.924	1.011	0.923	1.057	0	0.22	0.14	-0.22	0.19	0.03	-0.11	0.02	-0.11	0.08
Q01986	Dual specificity mitogen-activated protein kinase kinase 1 OS=Rattus norvegicus OX=10116 GN=Map2k1 PE=1 SV=2	9	0.863	0.992	0.923	0.936	0.975	0.991	1.029	0.989	0.987	0.986	-0.21	-0.01	-0.12	-0.1	-0.04	-0.01	0.04	-0.02	-0.02	-0.02
Q9WVK3	Peroxisomal trans-2-enoyl-CoA reductase OS=Rattus norvegicus OX=10116 GN=Pecr PE=2 SV=1	6	0.964	0.924	0.966	0.994	1.037	0.737	1.049	1.023	0.971	0.988	-0.05	-0.11	-0.05	-0.01	0.05	-0.44	0.07	0.03	-0.04	-0.02
G3V8G5	Golgi apparatus protein 1 OS=Rattus norvegicus OX=10116 GN=Glg1 PE=1 SV=1	9	1.053	1.094	1.018	0.994	0.996	1.232	0.959	0.999	0.993	1.04	0.07	0.13	0.03	-0.01	-0.01	0.3	-0.06	0	-0.01	0.06
A0A0G2K700	H/ACA ribonucleoprotein complex subunit DKC1 OS=Rattus norvegicus OX=10116 GN=Dkc1 PE=1 SV=2	7	0.802	0.8	1.057	0.984	1.07	1.019	1.092	1.08	1.062	1.082	-0.32	-0.32	0.08	-0.02	0.1	0.03	0.13	0.11	0.09	0.11
P12928	Pyruvate kinase PKLR OS=Rattus norvegicus OX=10116 GN=Pklr PE=1 SV=2	8	1.022	1.48	0.946	1.042	1.071	1.351	1.033	1.203	1.135	0.905	0.03	0.57	-0.08	0.06	0.1	0.43	0.05	0.27	0.18	-0.14
A0A8I5YCC9	Integrin subunit alpha 5 OS=Rattus norvegicus OX=10116 GN=Itga5 PE=1 SV=1	5	1.085	1.153	1.077	1.123	1.143	1.081	1.132	1.183	1.044	1.032	0.12	0.21	0.11	0.17	0.19	0.11	0.18	0.24	0.06	0.05
P0C5H9	Mesencephalic astrocyte-derived neurotrophic factor OS=Rattus norvegicus OX=10116 GN=Manf PE=1 SV=1	6	0.774	0.855	0.834	0.797	0.906	1.288	0.95	0.998	1.025	1.078	-0.37	-0.23	-0.26	-0.33	-0.14	0.37	-0.07	0	0.04	0.11
A0A8I5ZZF1	Ribosomal protein L22 OS=Rattus norvegicus OX=10116 GN=Rpl22 PE=1 SV=1	4	0.803	0.963	0.976	0.904	0.974	0.937	1.064	1.005	1.059	1.104	-0.32	-0.05	-0.03	-0.15	-0.04	-0.09	0.09	0.01	0.08	0.14
Q6U6G5	Zinc finger CCCH domain-containing protein 15 OS=Rattus norvegicus OX=10116 GN=Zc3h15 PE=1 SV=1	8	1.069	0.915	0.979	1.03	1.23	0.787	0.982	1.166	1.146	1.264	0.1	-0.13	-0.03	0.04	0.3	-0.34	-0.03	0.22	0.2	0.34
P55314	Complement component C8 beta chain OS=Rattus norvegicus OX=10116 GN=C8b PE=2 SV=2	7	0.874	1.371	0.857	0.96	0.905	1.466	0.937	1.216	1.066	0.842	-0.19	0.45	-0.22	-0.06	-0.14	0.55	-0.09	0.28	0.09	-0.25
P11232	Thioredoxin OS=Rattus norvegicus OX=10116 GN=Txn PE=1 SV=2	6	0.808	0.978	0.965	0.904	0.934	1.595	1.18	1.01	1.121	1.213	-0.31	-0.03	-0.05	-0.15	-0.1	0.67	0.24	0.01	0.16	0.28
A0A0G2K2G7	Ankyrin repeat and sterile alpha motif domain containing 1A OS=Rattus norvegicus OX=10116 GN=Anks1a PE=1 SV=2	7	0.875	0.982	0.999	0.971	1.087	0.972	1.066	1.157	1.086	1.108	-0.19	-0.03	0	-0.04	0.12	-0.04	0.09	0.21	0.12	0.15
G3V8P8	Anion exchange protein OS=Rattus norvegicus OX=10116 GN=Slc4a3 PE=1 SV=1	7	1.134	0.877	0.922	1.009	1.057	0.75	0.964	1.056	0.974	0.96	0.18	-0.19	-0.12	0.01	0.08	-0.41	-0.05	0.08	-0.04	-0.06
P04633	Mitochondrial brown fat uncoupling protein 1 OS=Rattus norvegicus OX=10116 GN=Ucp1 PE=1 SV=2	8	0.868	1.479	0.769	0.92	0.831	2.785	0.826	0.881	0.754	0.729	-0.2	0.56	-0.38	-0.12	-0.27	1.48	-0.28	-0.18	-0.41	-0.46
D3ZKU6	Guanylate binding protein 1 OS=Rattus norvegicus OX=10116 GN=Gbp1 PE=3 SV=3	7	0.933	0.696	0.939	1.019	1.133	0.673	1.052	0.924	1.07	1.051	-0.1	-0.52	-0.09	0.03	0.18	-0.57	0.07	-0.11	0.1	0.07
B5DER3	Isoamyl acetate-hydrolyzing esterase 1 homolog OS=Rattus norvegicus OX=10116 GN=Iah1 PE=2 SV=1	8	0.929	1.232	0.943	1.022	1.002	1.195	0.999	1.039	0.986	0.962	-0.11	0.3	-0.09	0.03	0	0.26	0	0.06	-0.02	-0.06
M0R5F1	Asporin OS=Rattus norvegicus OX=10116 GN=Aspn PE=1 SV=1	7	0.828	1.329	0.806	0.936	0.877	1.676	0.859	1.037	0.859	0.793	-0.27	0.41	-0.31	-0.1	-0.19	0.75	-0.22	0.05	-0.22	-0.33
Q99068	Alpha-2-macroglobulin receptor-associated protein OS=Rattus norvegicus OX=10116 GN=Lrpap1 PE=1 SV=2	10	0.851	0.934	0.918	0.885	0.984	1.217	0.969	0.933	0.967	0.972	-0.23	-0.1	-0.12	-0.18	-0.02	0.28	-0.05	-0.1	-0.05	-0.04
G3V9T7	ATPase Get3 OS=Rattus norvegicus OX=10116 GN=Get3 PE=1 SV=1	7	0.919	1.066	0.969	0.975	1.033	1.023	1.028	0.984	0.983	0.984	-0.12	0.09	-0.04	-0.04	0.05	0.03	0.04	-0.02	-0.02	-0.02
A0A0G2JY81	Fibulin-1 OS=Rattus norvegicus OX=10116 GN=Fbln1 PE=1 SV=1	8	0.797	1.872	0.752	1.015	0.919	2.001	0.886	1.052	0.934	0.834	-0.33	0.9	-0.41	0.02	-0.12	1	-0.17	0.07	-0.1	-0.26
A0A8L2UJN1	MYB binding protein 1a OS=Rattus norvegicus OX=10116 GN=Mybbp1a PE=1 SV=1	9	0.845	0.687	0.917	0.906	1.101	0.684	1.067	0.924	1.056	1.186	-0.24	-0.54	-0.13	-0.14	0.14	-0.55	0.09	-0.11	0.08	0.25
A0A8I5ZKK9	Alpha-synuclein OS=Rattus norvegicus OX=10116 GN=Snca PE=1 SV=1	6	0.715	2.229	0.733	0.988	0.75	2.287	0.812	1.097	0.855	0.703	-0.48	1.16	-0.45	-0.02	-0.41	1.19	-0.3	0.13	-0.23	-0.51
A0A8I6AD59	SPRY domain containing 4 OS=Rattus norvegicus OX=10116 GN=Spryd4 PE=1 SV=1	8	0.814	0.735	0.944	0.935	1.026	0.799	1.053	0.988	1.009	1.072	-0.3	-0.44	-0.08	-0.1	0.04	-0.32	0.07	-0.02	0.01	0.1
D3ZJH2	SURP and G patch domain containing 2 OS=Rattus norvegicus OX=10116 GN=Sugp2 PE=1 SV=1	7	0.995	1.151	0.918	0.981	0.977	1.112	1.019	1.101	1.052	1.035	-0.01	0.2	-0.12	-0.03	-0.03	0.15	0.03	0.14	0.07	0.05
B0BNG0	ER membrane protein complex subunit 2 OS=Rattus norvegicus OX=10116 GN=Emc2 PE=2 SV=1	7	1.092	1.114	1.007	1.045	1.116	0.817	1.07	1.087	1.076	1.084	0.13	0.16	0.01	0.06	0.16	-0.29	0.1	0.12	0.11	0.12
B1H267	Sorting nexin-5 OS=Rattus norvegicus OX=10116 GN=Snx5 PE=1 SV=1	12	0.973	1.147	0.973	1.028	1.046	1.165	1.054	1.043	1.065	0.991	-0.04	0.2	-0.04	0.04	0.07	0.22	0.08	0.06	0.09	-0.01
A0A0G2JXI6	CYFIP related Rac1 interactor B OS=Rattus norvegicus OX=10116 GN=Cyrib PE=1 SV=1	9	1.036	1.387	0.927	1.026	1.062	1.215	1.06	1.083	1.087	0.996	0.05	0.47	-0.11	0.04	0.09	0.28	0.08	0.11	0.12	-0.01
A0A8I5ZJ67	Nucleoporin 205 OS=Rattus norvegicus OX=10116 GN=Nup205 PE=1 SV=1	10	0.925	0.988	0.984	0.934	1.069	1.372	0.988	0.998	1.022	0.958	-0.11	-0.02	-0.02	-0.1	0.1	0.46	-0.02	0	0.03	-0.06
D4A3I4	Transcription factor BTF3 OS=Rattus norvegicus OX=10116 GN=Btf3l4 PE=1 SV=1	7	0.882	1.141	0.911	0.973	1.018	1.028	0.991	1.051	0.985	0.981	-0.18	0.19	-0.13	-0.04	0.03	0.04	-0.01	0.07	-0.02	-0.03
A0A8I5ZNI1	Smoothelin OS=Rattus norvegicus OX=10116 GN=Smtn PE=1 SV=1	10	0.855	1.065	0.858	0.897	0.939	2.223	0.922	0.998	0.948	0.905	-0.23	0.09	-0.22	-0.16	-0.09	1.15	-0.12	0	-0.08	-0.14
A0A8I6AEZ5	Cytoplasmic linker associated protein 1 OS=Rattus norvegicus OX=10116 GN=Clasp1 PE=1 SV=1	10	0.864	1.145	0.881	0.965	0.996	0.985	1.049	1.018	1.02	0.987	-0.21	0.2	-0.18	-0.05	-0.01	-0.02	0.07	0.03	0.03	-0.02
A0A8I6ASU0	Thioredoxin domain-containing protein OS=Rattus norvegicus OX=10116 GN=ENSRNOG00000066549 PE=4 SV=1	8	0.982	1.095	0.786	1.099	0.998	0.647	0.971	1.383	1.118	0.675	-0.03	0.13	-0.35	0.14	0	-0.63	-0.04	0.47	0.16	-0.57
A0A8I5ZM12	Annexin OS=Rattus norvegicus OX=10116 GN=Anxa7 PE=1 SV=1	8	0.966	1.415	0.954	1.021	1.012	1.436	1.063	1.101	1.168	0.913	-0.05	0.5	-0.07	0.03	0.02	0.52	0.09	0.14	0.22	-0.13
A0A8I5ZSX9	NCK-associated protein 1 OS=Rattus norvegicus OX=10116 GN=Nckap1 PE=1 SV=1	11	0.9	1.267	0.882	0.995	0.955	1.087	0.945	1.034	1.005	0.923	-0.15	0.34	-0.18	-0.01	-0.07	0.12	-0.08	0.05	0.01	-0.12
A0A8I5ZMM2	CAD protein OS=Rattus norvegicus OX=10116 GN=Cad PE=1 SV=1	10	1.014	1.085	1.017	1.055	1.076	1.052	1.089	1.105	1.103	1.031	0.02	0.12	0.03	0.08	0.11	0.07	0.12	0.14	0.14	0.04
D3ZF13	Acyl carrier protein OS=Rattus norvegicus OX=10116 GN=Ndufab1 PE=1 SV=1	4	0.683	0.502	1.249	0.778	0.859	0.57	0.993	0.723	0.911	1.783	-0.55	-1	0.32	-0.36	-0.22	-0.81	-0.01	-0.47	-0.14	0.83
F1M8H2	tryptophan--tRNA ligase OS=Rattus norvegicus OX=10116 GN=Wars2 PE=1 SV=2	8	1.07	1.23	0.878	1.007	1.019	0.955	0.966	1.025	0.982	0.893	0.1	0.3	-0.19	0.01	0.03	-0.07	-0.05	0.04	-0.03	-0.16
A0A0G2JU95	Triadin OS=Rattus norvegicus OX=10116 GN=Trdn PE=1 SV=3	10	0.788	1.087	1.021	1.019	1.007	0.824	1.045	1.104	1.011	1.005	-0.34	0.12	0.03	0.03	0.01	-0.28	0.06	0.14	0.02	0.01
Q6TUG0	DnaJ homolog subfamily B member 11 OS=Rattus norvegicus OX=10116 GN=Dnajb11 PE=2 SV=1	4	0.806	1.222	1.073	0.951	0.845	1.116	0.984	1.003	1.043	1.019	-0.31	0.29	0.1	-0.07	-0.24	0.16	-0.02	0	0.06	0.03
A0A8I6AHK9	Uroporphyrinogen decarboxylase OS=Rattus norvegicus OX=10116 GN=Urod PE=1 SV=1	5	0.818	0.875	0.845	0.983	0.964	0.998	0.992	0.919	0.929	0.903	-0.29	-0.19	-0.24	-0.02	-0.05	0	-0.01	-0.12	-0.11	-0.15
Q8VI32	Activated B cell RT1Bl alpha chain OS=Rattus norvegicus OX=10116 PE=2 SV=1	6	0.871	0.665	0.865	0.974	1.177	0.731	1.065	0.918	1.218	1.022	-0.2	-0.59	-0.21	-0.04	0.23	-0.45	0.09	-0.12	0.28	0.03
Q5XIH4	Lipoyl synthase, mitochondrial OS=Rattus norvegicus OX=10116 GN=Lias PE=2 SV=1	7	0.915	1.145	1.035	0.93	0.863	1.328	0.959	1.069	1.01	0.866	-0.13	0.19	0.05	-0.1	-0.21	0.41	-0.06	0.1	0.01	-0.21
A0A8I6AQY8	Poly(U)-binding-splicing factor PUF60 OS=Rattus norvegicus OX=10116 GN=Puf60 PE=1 SV=1	9	0.976	1.101	0.912	0.981	1.018	0.922	0.977	1.047	1.012	0.938	-0.03	0.14	-0.13	-0.03	0.03	-0.12	-0.03	0.07	0.02	-0.09
B2RYI2	Signal recognition particle subunit SRP68 OS=Rattus norvegicus OX=10116 GN=Srp68 PE=1 SV=1	8	0.849	1.225	0.88	0.875	0.938	1.456	1.015	0.996	1.031	0.958	-0.24	0.29	-0.18	-0.19	-0.09	0.54	0.02	-0.01	0.04	-0.06
A0A8L2UJT5	40S ribosomal protein S23 OS=Rattus norvegicus OX=10116 GN=Rps23 PE=3 SV=1	6	0.678	0.764	1.044	0.922	1.072	0.856	1.058	1.03	1.093	1.111	-0.56	-0.39	0.06	-0.12	0.1	-0.22	0.08	0.04	0.13	0.15
A0A0G2KAA3	NADH dehydrogenase [ubiquinone] 1 alpha subcomplex subunit 3 OS=Rattus norvegicus OX=10116 GN=Ndufa3 PE=1 SV=2	3	0.755	0.499	0.989	0.831	0.983	0.546	0.977	0.84	1.004	1.215	-0.41	-1	-0.02	-0.27	-0.02	-0.87	-0.03	-0.25	0.01	0.28
A0A8J8XIU8	RNA binding motif protein 39 OS=Rattus norvegicus OX=10116 GN=Rbm39 PE=1 SV=1	8	0.938	0.974	0.919	0.936	1.029	0.766	0.974	1.007	1.065	1.028	-0.09	-0.04	-0.12	-0.09	0.04	-0.38	-0.04	0.01	0.09	0.04
B1WBS4	Similar to Vacuolar protein sorting 26 homolog (VPS26 protein homolog), isoform CRA_a OS=Rattus norvegicus OX=10116 GN=Vps26b PE=1 SV=1	9	0.97	1.079	1.006	1.042	1.132	1.198	1.098	1.132	1.006	1.029	-0.04	0.11	0.01	0.06	0.18	0.26	0.14	0.18	0.01	0.04
A0A8I6GEH8	Enhancer trap locus 4 OS=Rattus norvegicus OX=10116 GN=Etl4 PE=1 SV=1	11	1.006	0.804	0.991	1.001	1.002	0.891	0.95	1.042	0.932	0.996	0.01	-0.31	-0.01	0	0	-0.17	-0.07	0.06	-0.1	-0.01
D4A1Y9	Steroid 5 alpha-reductase 2-like 2 (Predicted), isoform CRA_b OS=Rattus norvegicus OX=10116 GN=Tecrl PE=3 SV=1	6	0.765	0.844	0.992	0.772	0.95	0.909	0.98	0.879	1.084	1.306	-0.39	-0.24	-0.01	-0.37	-0.07	-0.14	-0.03	-0.19	0.12	0.38
A0A8J8XEU2	Mitofusin 2 OS=Rattus norvegicus OX=10116 GN=Mfn2 PE=1 SV=1	9	1.194	1.286	0.757	1.068	1.205	1.172	1.021	0.967	1.107	0.897	0.26	0.36	-0.4	0.1	0.27	0.23	0.03	-0.05	0.15	-0.16
A0A8I6GLR1	Collagen type XVIII alpha 1 chain OS=Rattus norvegicus OX=10116 GN=Col18a1 PE=1 SV=1	9	0.95	1.05	0.805	0.975	1.021	1.512	0.853	0.997	0.902	0.934	-0.07	0.07	-0.31	-0.04	0.03	0.6	-0.23	0	-0.15	-0.1
A0A8I6A1W1	Carbonyl reductase 4 OS=Rattus norvegicus OX=10116 GN=Cbr4 PE=1 SV=1	6	0.945	1.024	0.887	1.01	0.966	0.886	1.013	1.018	0.982	0.946	-0.08	0.03	-0.17	0.01	-0.05	-0.17	0.02	0.03	-0.03	-0.08
Q5VLR5	BWK4 OS=Rattus norvegicus OX=10116 GN=Erp44 PE=1 SV=1	9	0.918	1.233	0.959	1.033	1.054	1.252	1.03	1.057	1.008	0.985	-0.12	0.3	-0.06	0.05	0.08	0.32	0.04	0.08	0.01	-0.02
B2GUZ5	F-actin-capping protein subunit alpha-1 OS=Rattus norvegicus OX=10116 GN=Capza1 PE=1 SV=1	7	1.434	1.61	0.891	1.021	0.912	1.352	0.802	0.843	0.873	0.831	0.52	0.69	-0.17	0.03	-0.13	0.43	-0.32	-0.25	-0.2	-0.27
D3ZGP9	Dehydrogenase/reductase SDR family member 7C OS=Rattus norvegicus OX=10116 GN=Dhrs7c PE=2 SV=1	6	0.785	0.656	1.047	0.815	1.011	0.736	1.034	0.822	1.05	1.153	-0.35	-0.61	0.07	-0.29	0.02	-0.44	0.05	-0.28	0.07	0.21
A0A8I5ZPF8	Ubiquitin specific peptidase 25 OS=Rattus norvegicus OX=10116 GN=Usp25 PE=1 SV=1	7	1.119	1.169	1.004	1.095	1.113	1.107	1.071	0.991	1.125	1.078	0.16	0.23	0.01	0.13	0.15	0.15	0.1	-0.01	0.17	0.11
Q4FZT2	Protein phosphatase methylesterase 1 OS=Rattus norvegicus OX=10116 GN=Ppme1 PE=1 SV=2	6	0.874	1.05	0.842	0.877	0.969	0.968	0.898	0.919	0.902	0.896	-0.19	0.07	-0.25	-0.19	-0.05	-0.05	-0.16	-0.12	-0.15	-0.16
A0A8I6ALN4	very-long-chain enoyl-CoA reductase OS=Rattus norvegicus OX=10116 GN=Tecr PE=1 SV=1	8	1.19	1.517	0.932	0.83	1.072	0.757	0.94	1.029	1.111	0.913	0.25	0.6	-0.1	-0.27	0.1	-0.4	-0.09	0.04	0.15	-0.13
A0A8I6A479	Basic leucine zipper and W2 domains 1 OS=Rattus norvegicus OX=10116 GN=Bzw1 PE=1 SV=1	9	1.165	1.558	1.039	1.071	1.124	1.265	1.04	1.059	1.007	0.923	0.22	0.64	0.05	0.1	0.17	0.34	0.06	0.08	0.01	-0.12
D3ZK73	Cullin 4B OS=Rattus norvegicus OX=10116 GN=Cul4b PE=1 SV=1	11	0.855	1.022	0.974	0.906	1.018	1.217	1.025	1.038	1.175	1.018	-0.23	0.03	-0.04	-0.14	0.03	0.28	0.04	0.05	0.23	0.03
A0A8I6APG8	NADH dehydrogenase [ubiquinone] 1 beta subcomplex subunit 4 OS=Rattus norvegicus OX=10116 GN=LOC120094308 PE=3 SV=1	5	0.945	0.678	1.17	1.037	1.102	0.596	1.146	0.919	0.988	1.066	-0.08	-0.56	0.23	0.05	0.14	-0.75	0.2	-0.12	-0.02	0.09
Q6PCU4	Emd protein OS=Rattus norvegicus OX=10116 GN=Emd PE=1 SV=1	7	1.01	1.175	0.988	0.982	0.999	1.132	0.955	1.049	0.974	0.964	0.02	0.23	-0.02	-0.03	0	0.18	-0.07	0.07	-0.04	-0.05
Q566R0	Acyl-coenzyme A thioesterase THEM4 OS=Rattus norvegicus OX=10116 GN=Them4 PE=2 SV=1	7	0.905	0.975	0.912	0.967	0.978	1.057	1.009	0.978	1.003	0.946	-0.14	-0.04	-0.13	-0.05	-0.03	0.08	0.01	-0.03	0	-0.08
Q6P7Q4	Lactoylglutathione lyase OS=Rattus norvegicus OX=10116 GN=Glo1 PE=1 SV=3	9	0.883	1.107	0.813	1.055	1.03	1.377	1.101	1.1	1.081	0.907	-0.18	0.15	-0.3	0.08	0.04	0.46	0.14	0.14	0.11	-0.14
F1LVY9	Peptide deformylase OS=Rattus norvegicus OX=10116 GN=Pdf PE=1 SV=2	7	1.037	1.195	0.886	1.033	1	0.972	0.967	1.042	1.023	0.916	0.05	0.26	-0.17	0.05	0	-0.04	-0.05	0.06	0.03	-0.13
P0C0A1	Vacuolar protein-sorting-associated protein 25 OS=Rattus norvegicus OX=10116 GN=Vps25 PE=1 SV=1	6	0.996	1.143	0.905	1.006	1.028	0.946	0.961	0.986	0.97	0.922	-0.01	0.19	-0.14	0.01	0.04	-0.08	-0.06	-0.02	-0.04	-0.12
B0BNG3	Lman2 protein OS=Rattus norvegicus OX=10116 GN=Lman2 PE=2 SV=1	9	1.072	1.344	0.922	1.053	0.991	1.105	0.973	1.011	0.974	0.927	0.1	0.43	-0.12	0.07	-0.01	0.14	-0.04	0.02	-0.04	-0.11
Q3KR94	Vitronectin OS=Rattus norvegicus OX=10116 GN=Vtn PE=2 SV=1	7	0.82	1.156	0.871	0.955	0.909	1.518	0.966	1.086	1.079	0.917	-0.29	0.21	-0.2	-0.07	-0.14	0.6	-0.05	0.12	0.11	-0.12
P80386	5'-AMP-activated protein kinase subunit beta-1 OS=Rattus norvegicus OX=10116 GN=Prkab1 PE=1 SV=4	5	0.972	0.922	0.868	1.047	1.116	0.801	1.055	1.041	0.993	0.893	-0.04	-0.12	-0.2	0.07	0.16	-0.32	0.08	0.06	-0.01	-0.16
Q91ZN1	Coronin-1A OS=Rattus norvegicus OX=10116 GN=Coro1a PE=1 SV=3	9	0.898	1.237	0.908	0.988	0.954	1.843	0.967	1.038	1.027	1.012	-0.15	0.31	-0.14	-0.02	-0.07	0.88	-0.05	0.05	0.04	0.02
A0A8I5ZJB6	Tubulin-specific chaperone D OS=Rattus norvegicus OX=10116 GN=Tbcd PE=1 SV=1	8	0.961	1.16	0.915	1.054	1.028	1.167	1.021	0.992	1.026	1.034	-0.06	0.21	-0.13	0.08	0.04	0.22	0.03	-0.01	0.04	0.05
A0A8I6AKB7	SAP domain containing ribonucleoprotein OS=Rattus norvegicus OX=10116 GN=Sarnp PE=1 SV=1	7	0.906	0.976	1.043	0.944	0.951	1.035	0.988	0.93	0.975	1.096	-0.14	-0.03	0.06	-0.08	-0.07	0.05	-0.02	-0.1	-0.04	0.13
Q5XIW8	U4/U6.U5 tri-snRNP-associated protein 1 OS=Rattus norvegicus OX=10116 GN=Sart1 PE=1 SV=1	7	0.792	0.837	0.887	0.827	1.122	0.865	1.043	1.047	1.018	1.177	-0.34	-0.26	-0.17	-0.27	0.17	-0.21	0.06	0.07	0.03	0.24
B1WBX6	Smap2 protein OS=Rattus norvegicus OX=10116 GN=Smap2 PE=1 SV=1	7	1.043	0.99	0.977	1.072	1.089	0.897	0.976	1.08	1.009	0.998	0.06	-0.01	-0.03	0.1	0.12	-0.16	-0.04	0.11	0.01	0
Q07014	Tyrosine-protein kinase Lyn OS=Rattus norvegicus OX=10116 GN=Lyn PE=1 SV=3	8	0.829	0.98	0.94	0.945	1.01	1.157	1.094	1.107	1.002	1.031	-0.27	-0.03	-0.09	-0.08	0.01	0.21	0.13	0.15	0	0.04
Q5BK18	Cytosolic iron-sulfur assembly component 3 OS=Rattus norvegicus OX=10116 GN=Ciao3 PE=2 SV=1	5	0.888	0.845	0.931	0.976	1.058	0.774	1	1.015	1.037	0.988	-0.17	-0.24	-0.1	-0.04	0.08	-0.37	0	0.02	0.05	-0.02
P62994	Growth factor receptor-bound protein 2 OS=Rattus norvegicus OX=10116 GN=Grb2 PE=1 SV=1	8	0.86	0.807	0.924	0.937	1.066	0.817	0.988	0.954	0.982	0.968	-0.22	-0.31	-0.11	-0.09	0.09	-0.29	-0.02	-0.07	-0.03	-0.05
A0A8I6B6B8	Ras-related protein Rab-18 OS=Rattus norvegicus OX=10116 GN=Rab18 PE=1 SV=1	7	0.944	1.029	0.929	0.972	1.016	1.053	1.028	1.041	1.056	0.997	-0.08	0.04	-0.11	-0.04	0.02	0.07	0.04	0.06	0.08	0
D3ZPF2	Malonyl-CoA-acyl carrier protein transacylase OS=Rattus norvegicus OX=10116 GN=Mcat PE=1 SV=1	7	0.962	0.89	0.98	1.009	1.026	0.746	1.009	1.033	1.052	0.983	-0.06	-0.17	-0.03	0.01	0.04	-0.42	0.01	0.05	0.07	-0.02
D3ZAY8	Pinin OS=Rattus norvegicus OX=10116 GN=Pnn PE=1 SV=2	11	1.191	1.638	0.931	1.089	0.961	1.07	1.048	1.158	0.996	0.943	0.25	0.71	-0.1	0.12	-0.06	0.1	0.07	0.21	-0.01	-0.09
D3ZN43	NADH dehydrogenase (ubiquinone) complex I, assembly factor 6 OS=Rattus norvegicus OX=10116 GN=Ndufaf6 PE=3 SV=1	6	0.719	0.73	0.895	0.858	1.033	0.92	0.898	0.911	0.955	0.996	-0.48	-0.45	-0.16	-0.22	0.05	-0.12	-0.15	-0.13	-0.07	-0.01
D4A7L6	ribose-5-phosphate isomerase OS=Rattus norvegicus OX=10116 GN=Rpia PE=1 SV=1	9	0.981	1.248	0.909	0.991	0.968	1.129	1.022	1.105	1.006	0.941	-0.03	0.32	-0.14	-0.01	-0.05	0.18	0.03	0.14	0.01	-0.09
Q7M6Z3	N-lysine methyltransferase SMYD2 OS=Rattus norvegicus OX=10116 GN=Smyd2 PE=1 SV=1	8	0.954	0.792	0.998	0.895	1.047	0.703	1.09	1.045	1.042	1.079	-0.07	-0.34	0	-0.16	0.07	-0.51	0.12	0.06	0.06	0.11
F7EWC1	Vasodilator-stimulated phosphoprotein OS=Rattus norvegicus OX=10116 GN=Vasp PE=1 SV=3	6	0.941	1.198	0.99	0.891	1.076	1.637	1.008	1.046	1.125	1.001	-0.09	0.26	-0.02	-0.17	0.11	0.71	0.01	0.06	0.17	0
A0A0G2K3V4	UDP-N-acetylglucosamine--peptide N-acetylglucosaminyltransferase 110 kDa subunit OS=Rattus norvegicus OX=10116 GN=Ogt PE=1 SV=1	11	0.947	1.162	0.984	1.055	0.928	0.994	0.958	1.089	1.004	0.958	-0.08	0.22	-0.02	0.08	-0.11	-0.01	-0.06	0.12	0.01	-0.06
F1LSS1	Structural maintenance of chromosomes protein OS=Rattus norvegicus OX=10116 GN=Smc1a PE=1 SV=4	11	0.855	0.992	0.981	1.004	1.031	1.695	1.041	1.341	1.054	1.38	-0.23	-0.01	-0.03	0.01	0.04	0.76	0.06	0.42	0.08	0.46
Q4KLF8	Actin-related protein 2/3 complex subunit 5 OS=Rattus norvegicus OX=10116 GN=Arpc5 PE=1 SV=3	7	1.564	1.333	0.928	0.997	0.888	1.188	0.803	0.873	0.854	0.857	0.65	0.41	-0.11	0	-0.17	0.25	-0.32	-0.2	-0.23	-0.22
A0A8I6A7Q1	Protein MEMO1 OS=Rattus norvegicus OX=10116 GN=Memo1 PE=1 SV=1	6	0.86	0.837	0.913	0.97	1.01	0.911	0.994	0.935	0.918	0.913	-0.22	-0.26	-0.13	-0.04	0.01	-0.13	-0.01	-0.1	-0.12	-0.13
Q64568	Plasma membrane calcium-transporting ATPase 3 OS=Rattus norvegicus OX=10116 GN=Atp2b3 PE=1 SV=2	9	0.606	0.9	0.989	0.795	1.011	1.065	0.915	0.894	1.105	1.08	-0.72	-0.15	-0.02	-0.33	0.02	0.09	-0.13	-0.16	0.14	0.11
A0A8I6AHK0	Periostin OS=Rattus norvegicus OX=10116 GN=Postn PE=1 SV=1	10	0.948	0.999	1.014	1.019	1.101	1.12	1.02	1.03	1.098	1.22	-0.08	0	0.02	0.03	0.14	0.16	0.03	0.04	0.13	0.29
A0A0G2JYR4	LPS responsive beige-like anchor protein OS=Rattus norvegicus OX=10116 GN=Lrba PE=1 SV=2	10	0.952	0.855	0.856	0.888	0.966	1.069	0.87	0.991	0.872	0.812	-0.07	-0.23	-0.23	-0.17	-0.05	0.1	-0.2	-0.01	-0.2	-0.3
P16221	Cytochrome c oxidase subunit 8B, mitochondrial OS=Rattus norvegicus OX=10116 GN=Cox8b PE=1 SV=3	3	0.511	0.311	0.907	0.686	1.016	0.301	0.851	0.626	0.758	0.882	-0.97	-1.69	-0.14	-0.54	0.02	-1.73	-0.23	-0.68	-0.4	-0.18
A0A8I5ZR90	SAC1 like phosphatidylinositide phosphatase OS=Rattus norvegicus OX=10116 GN=Sacm1l PE=1 SV=1	9	0.878	1.215	0.894	1.002	0.986	1.395	1.094	1.026	1.051	1.027	-0.19	0.28	-0.16	0	-0.02	0.48	0.13	0.04	0.07	0.04
D3ZIP8	Endonuclease domain containing 1 OS=Rattus norvegicus OX=10116 GN=Endod1 PE=4 SV=3	7	1.011	1.428	0.909	1.088	1.002	1.39	0.991	1.061	0.988	0.96	0.02	0.51	-0.14	0.12	0	0.48	-0.01	0.09	-0.02	-0.06
A0A8I6A178	Mitochondrial ribosomal protein S7 OS=Rattus norvegicus OX=10116 GN=Mrps7 PE=1 SV=1	9	0.824	0.758	0.919	0.882	1.076	0.784	0.933	0.952	1.028	1.115	-0.28	-0.4	-0.12	-0.18	0.11	-0.35	-0.1	-0.07	0.04	0.16
A0A8I5ZVN9	40S ribosomal protein S11 OS=Rattus norvegicus OX=10116 GN=Rps11 PE=1 SV=1	8	0.719	0.867	1.081	0.905	0.953	1.073	1.083	1.081	1.073	1.127	-0.48	-0.21	0.11	-0.14	-0.07	0.1	0.12	0.11	0.1	0.17
A0A0G2JSW9	Carbonyl reductase (NADPH) OS=Rattus norvegicus OX=10116 GN=LOC100360601 PE=1 SV=1	4	0.698	0.657	0.843	0.967	1.194	0.621	0.841	0.828	0.861	0.923	-0.52	-0.61	-0.25	-0.05	0.26	-0.69	-0.25	-0.27	-0.22	-0.12
D3ZFB2	LUC7-like 3 pre-mRNA splicing factor OS=Rattus norvegicus OX=10116 GN=Luc7l3 PE=1 SV=1	8	0.934	1.145	0.858	0.996	0.994	0.968	1.048	1.067	1.011	0.951	-0.1	0.2	-0.22	-0.01	-0.01	-0.05	0.07	0.09	0.02	-0.07
A0A8J8YHW4	Secretory carrier-associated membrane protein OS=Rattus norvegicus OX=10116 GN=Clk2 PE=1 SV=1	5	1.099	1.117	1.083	1.025	0.947	0.941	0.889	0.971	0.99	0.963	0.14	0.16	0.11	0.04	-0.08	-0.09	-0.17	-0.04	-0.02	-0.05
Q4G067	Mitochondrial ribosomal protein L44 OS=Rattus norvegicus OX=10116 GN=Mrpl44 PE=1 SV=1	7	0.899	0.75	0.907	0.967	1.068	0.797	1.006	0.998	1.002	1.035	-0.15	-0.41	-0.14	-0.05	0.1	-0.33	0.01	0	0	0.05
A0A8I5ZU78	leucine--tRNA ligase OS=Rattus norvegicus OX=10116 GN=Lars2 PE=1 SV=1	9	0.933	0.975	0.972	0.971	1.115	0.875	1.142	1.059	1.122	1.07	-0.1	-0.04	-0.04	-0.04	0.16	-0.19	0.19	0.08	0.17	0.1
A0A8I6ALA1	S-adenosylmethionine synthase OS=Rattus norvegicus OX=10116 GN=Mat2a PE=1 SV=1	8	0.921	1.02	0.936	1.056	1.025	1.021	1.037	1.06	1.008	0.953	-0.12	0.03	-0.09	0.08	0.04	0.03	0.05	0.08	0.01	-0.07
P84092	AP-2 complex subunit mu OS=Rattus norvegicus OX=10116 GN=Ap2m1 PE=1 SV=1	10	0.866	1.032	0.873	0.991	0.988	1.078	0.996	1.03	1.021	0.948	-0.21	0.05	-0.2	-0.01	-0.02	0.11	-0.01	0.04	0.03	-0.08
A0A0G2JSM8	Cell division control protein 42 homolog OS=Rattus norvegicus OX=10116 GN=Cdc42 PE=1 SV=1	6	1.359	1.21	1.22	1.222	1.205	1.295	1.177	1.212	1.255	1.267	0.44	0.27	0.29	0.29	0.27	0.37	0.23	0.28	0.33	0.34
Q4QR80	28S ribosomal protein S25, mitochondrial OS=Rattus norvegicus OX=10116 GN=Mrps25 PE=2 SV=1	7	0.985	0.825	0.962	0.995	1.056	0.813	1.001	1.036	0.994	0.984	-0.02	-0.28	-0.06	-0.01	0.08	-0.3	0	0.05	-0.01	-0.02
A0A0G2K8L9	Mitochondrial ribosomal protein S28 OS=Rattus norvegicus OX=10116 GN=Mrps28 PE=4 SV=2	6	1.075	1.091	0.956	1.08	1.112	0.874	1.069	1.019	1.06	1.042	0.1	0.13	-0.06	0.11	0.15	-0.19	0.1	0.03	0.08	0.06
A0A8I6A8Y4	Mitochondrial transcription rescue factor 1 OS=Rattus norvegicus OX=10116 GN=Mtres1 PE=1 SV=1	8	0.949	0.884	1.021	1.075	1.104	0.844	1.078	1.052	1.063	1.056	-0.08	-0.18	0.03	0.1	0.14	-0.24	0.11	0.07	0.09	0.08
P56522	NADPH:adrenodoxin oxidoreductase, mitochondrial OS=Rattus norvegicus OX=10116 GN=Fdxr PE=1 SV=1	9	0.779	0.687	1.054	0.991	1.055	0.867	1.093	0.986	1.052	1.027	-0.36	-0.54	0.08	-0.01	0.08	-0.21	0.13	-0.02	0.07	0.04
D3ZD97	RNA helicase OS=Rattus norvegicus OX=10116 GN=Dhx15 PE=1 SV=1	8	0.946	1.091	0.957	1.024	1.083	1.164	1.069	1.308	1.085	1.34	-0.08	0.13	-0.06	0.03	0.12	0.22	0.1	0.39	0.12	0.42
A0A8I6A4V0	Thyroid hormone receptor interactor 10 OS=Rattus norvegicus OX=10116 GN=Trip10 PE=1 SV=1	8	1.153	1.175	0.986	1.059	1.064	0.92	1.017	1.039	1.005	0.945	0.2	0.23	-0.02	0.08	0.09	-0.12	0.02	0.05	0.01	-0.08
M0R402	RCG20581, isoform CRA_a OS=Rattus norvegicus OX=10116 GN=Tmx3 PE=1 SV=3	8	1.065	0.908	1.225	0.959	0.972	0.838	0.999	0.917	0.991	0.955	0.09	-0.14	0.29	-0.06	-0.04	-0.25	0	-0.12	-0.01	-0.07
A0A8I5ZVT0	Tumor protein, translationally-controlled 1 OS=Rattus norvegicus OX=10116 GN=Tpt1 PE=1 SV=1	7	0.64	0.623	1.125	0.813	0.974	1.016	1.091	0.872	1.126	1.329	-0.64	-0.68	0.17	-0.3	-0.04	0.02	0.13	-0.2	0.17	0.41
F1M124	Cordon-bleu WH2 repeat protein-like 1 OS=Rattus norvegicus OX=10116 GN=Cobll1 PE=1 SV=3	7	0.794	1.135	0.838	0.905	0.859	1.16	1.019	0.953	0.933	1.007	-0.33	0.18	-0.25	-0.14	-0.22	0.21	0.03	-0.07	-0.1	0.01
D3ZMR9	Mitochondrial ribosomal protein L21 OS=Rattus norvegicus OX=10116 GN=Mrpl21 PE=1 SV=1	6	0.957	0.978	0.969	0.959	1.049	0.964	1.129	1.049	1.075	1.152	-0.06	-0.03	-0.05	-0.06	0.07	-0.05	0.18	0.07	0.1	0.2
Q62975	Protein Z-dependent protease inhibitor OS=Rattus norvegicus OX=10116 GN=Serpina10 PE=2 SV=2	9	0.793	1.252	0.832	0.927	0.892	1.526	0.886	1.024	0.938	0.853	-0.33	0.32	-0.27	-0.11	-0.16	0.61	-0.17	0.03	-0.09	-0.23
A0A8I6A254	39S ribosomal protein L15, mitochondrial OS=Rattus norvegicus OX=10116 GN=Mrpl15 PE=1 SV=1	9	1.067	1.286	0.884	1.058	0.939	0.993	0.99	1.091	1.016	0.9	0.09	0.36	-0.18	0.08	-0.09	-0.01	-0.01	0.13	0.02	-0.15
F7F5P9	G3BP stress granule assembly factor 2 OS=Rattus norvegicus OX=10116 GN=G3bp2 PE=1 SV=1	8	0.923	0.912	0.922	0.958	1.016	0.84	1.042	1.116	1.076	1.05	-0.12	-0.13	-0.12	-0.06	0.02	-0.25	0.06	0.16	0.11	0.07
D3Z9E1	Elastin microfibril interfacer 1 OS=Rattus norvegicus OX=10116 GN=Emilin1 PE=4 SV=2	7	0.989	1.295	0.97	1.028	0.913	1.152	0.903	0.994	0.907	0.862	-0.02	0.37	-0.04	0.04	-0.13	0.2	-0.15	-0.01	-0.14	-0.21
G3V9T4	Transmembrane protein 38a OS=Rattus norvegicus OX=10116 GN=Tmem38a PE=3 SV=1	6	0.73	0.719	0.876	0.737	0.931	0.672	0.975	0.983	1.109	1.141	-0.45	-0.48	-0.19	-0.44	-0.1	-0.57	-0.04	-0.03	0.15	0.19
B2RZC6	Ilf2 protein OS=Rattus norvegicus OX=10116 GN=Ilf2 PE=1 SV=1	10	0.863	0.904	0.957	1.106	1.05	1.146	1.097	1.015	1.003	0.99	-0.21	-0.15	-0.06	0.15	0.07	0.2	0.13	0.02	0	-0.01
P62755	40S ribosomal protein S6 OS=Rattus norvegicus OX=10116 GN=Rps6 PE=1 SV=1	6	0.721	0.729	1.045	0.929	0.959	0.726	1.099	1.024	1.105	1.132	-0.47	-0.46	0.06	-0.11	-0.06	-0.46	0.14	0.03	0.14	0.18
F7F2F3	Heat shock protein family A (Hsp70) member 4 like OS=Rattus norvegicus OX=10116 GN=Hspa4l PE=1 SV=1	10	1.091	1.219	1.012	1.086	0.99	1.098	1.039	1.082	1.102	1.063	0.13	0.29	0.02	0.12	-0.02	0.14	0.05	0.11	0.14	0.09
A0A8I6A0T8	Serpin family B member 9 OS=Rattus norvegicus OX=10116 GN=Serpinb9 PE=1 SV=1	8	1.054	1.545	0.816	0.993	0.845	1.776	0.906	1.064	0.925	0.771	0.08	0.63	-0.29	-0.01	-0.24	0.83	-0.14	0.09	-0.11	-0.38
A0A8L2QF48	Copine 1 OS=Rattus norvegicus OX=10116 GN=Cpne1 PE=1 SV=1	8	0.854	1.429	0.816	0.945	0.844	1.503	0.954	1.063	1.001	0.863	-0.23	0.52	-0.29	-0.08	-0.25	0.59	-0.07	0.09	0	-0.21
D4A4U3	Magnesium-dependent phosphatase 1 OS=Rattus norvegicus OX=10116 GN=Mdp1 PE=4 SV=2	5	0.943	1.144	0.882	1.007	1.047	1.188	0.984	1.049	1.003	0.928	-0.09	0.19	-0.18	0.01	0.07	0.25	-0.02	0.07	0	-0.11
D3ZE49	Trafficking protein particle complex subunit 12 OS=Rattus norvegicus OX=10116 GN=Trappc12 PE=1 SV=1	7	0.729	1.181	0.864	0.937	0.832	2.046	0.938	1.118	1.003	0.879	-0.46	0.24	-0.21	-0.09	-0.27	1.03	-0.09	0.16	0	-0.19
A0A096XNM4	Cytochrome b (Fragment) OS=Rattus norvegicus OX=10116 PE=3 SV=1	5	0.857	0.642	1.143	0.967	1.042	0.59	1.127	0.918	1.045	1.173	-0.22	-0.64	0.19	-0.05	0.06	-0.76	0.17	-0.12	0.06	0.23
Q5XI18	Acyl-Coenzyme A binding domain containing 3 OS=Rattus norvegicus OX=10116 GN=Acbd3 PE=2 SV=1	8	0.944	1.054	0.967	1.032	1.076	1.008	1.041	1.327	1.066	1.504	-0.08	0.08	-0.05	0.05	0.11	0.01	0.06	0.41	0.09	0.59
G3V985	Similar to SCO cytochrome oxidase deficient homolog 1 (Yeast) (Predicted) OS=Rattus norvegicus OX=10116 GN=Sco1 PE=1 SV=1	5	0.956	0.835	1.004	1.035	1.059	0.842	1.073	0.967	1.009	1.084	-0.06	-0.26	0.01	0.05	0.08	-0.25	0.1	-0.05	0.01	0.12
Q9R066	Coxsackievirus and adenovirus receptor homolog OS=Rattus norvegicus OX=10116 GN=Cxadr PE=1 SV=2	7	0.831	1.178	0.935	0.903	0.982	1.036	0.975	1.027	0.968	1.015	-0.27	0.24	-0.1	-0.15	-0.03	0.05	-0.04	0.04	-0.05	0.02
Q3B7D0	Oxygen-dependent coproporphyrinogen-III oxidase, mitochondrial OS=Rattus norvegicus OX=10116 GN=Cpox PE=1 SV=1	7	0.906	1.212	0.92	1.061	1.013	1.31	0.991	1.075	1.092	0.948	-0.14	0.28	-0.12	0.09	0.02	0.39	-0.01	0.1	0.13	-0.08
A0A8I6G597	Paralemmin OS=Rattus norvegicus OX=10116 GN=Palm PE=1 SV=1	8	0.914	1.133	0.974	1.063	1.039	1.204	0.988	1.037	0.993	1.011	-0.13	0.18	-0.04	0.09	0.06	0.27	-0.02	0.05	-0.01	0.02
A0A8I6A9D8	DEK proto-oncogene OS=Rattus norvegicus OX=10116 GN=Dek PE=1 SV=1	8	0.962	1.178	0.94	1.012	1.016	0.909	1.004	1.031	1.002	1.048	-0.06	0.24	-0.09	0.02	0.02	-0.14	0.01	0.04	0	0.07
A0A0G2JW94	Clathrin interactor 1 OS=Rattus norvegicus OX=10116 GN=Clint1 PE=1 SV=2	8	0.887	1.205	0.957	0.965	1.002	1.072	1.031	0.964	1.074	1.108	-0.17	0.27	-0.06	-0.05	0	0.1	0.04	-0.05	0.1	0.15
D4A1H7	RING-type E3 ubiquitin transferase OS=Rattus norvegicus OX=10116 GN=Mul1 PE=1 SV=1	6	1.036	1.165	0.974	1.035	0.963	0.926	0.992	1.04	1.022	0.927	0.05	0.22	-0.04	0.05	-0.05	-0.11	-0.01	0.06	0.03	-0.11
E9PU01	DNA helicase OS=Rattus norvegicus OX=10116 GN=Chd4 PE=1 SV=4	9	0.997	1.197	0.917	0.993	1.05	1.137	1.012	1.105	1.075	0.999	0	0.26	-0.12	-0.01	0.07	0.19	0.02	0.14	0.1	0
A0A8I6AG38	Striatin OS=Rattus norvegicus OX=10116 GN=Strn PE=1 SV=1	11	1.124	1.224	1.038	1.094	1.075	1.086	1.083	1.049	1.064	0.971	0.17	0.29	0.05	0.13	0.1	0.12	0.12	0.07	0.09	-0.04
D3ZIN7	Mitochondrial ribosomal protein S23 OS=Rattus norvegicus OX=10116 GN=Mrps23 PE=1 SV=1	8	1.024	1.078	0.964	0.957	1.054	0.905	1.009	1.042	0.995	1.012	0.03	0.11	-0.05	-0.06	0.08	-0.14	0.01	0.06	-0.01	0.02
D3ZYT2	Mitochondrial ribosomal protein S5 OS=Rattus norvegicus OX=10116 GN=Mrps5 PE=1 SV=1	11	0.787	0.921	0.907	0.889	0.963	0.659	1.052	1.052	1.09	1.061	-0.35	-0.12	-0.14	-0.17	-0.05	-0.6	0.07	0.07	0.12	0.09
A0A8I6G6W8	Proline-rich coiled-coil 2C OS=Rattus norvegicus OX=10116 GN=Prrc2c PE=1 SV=1	9	0.868	0.895	1.005	0.952	1.096	0.826	0.98	0.941	1.003	1.146	-0.2	-0.16	0.01	-0.07	0.13	-0.28	-0.03	-0.09	0	0.2
Q91W30	Aldose reductase-like protein OS=Rattus norvegicus OX=10116 GN=Akr1b8 PE=2 SV=1	10	0.866	0.92	1.064	0.947	1.09	1.282	1.187	0.791	0.992	1	-0.21	-0.12	0.09	-0.08	0.12	0.36	0.25	-0.34	-0.01	0
A0A8I6AWW7	F-actin-capping protein subunit beta OS=Rattus norvegicus OX=10116 GN=Capzb PE=1 SV=1	9	1.294	1.909	0.827	0.933	0.921	2.107	0.793	0.805	0.81	0.767	0.37	0.93	-0.27	-0.1	-0.12	1.07	-0.34	-0.31	-0.3	-0.38
F7F4R3	Aminopeptidase OS=Rattus norvegicus OX=10116 GN=Erap1 PE=1 SV=1	11	1.024	1.282	0.872	1.03	0.993	1.171	0.968	1.066	1.016	0.957	0.03	0.36	-0.2	0.04	-0.01	0.23	-0.05	0.09	0.02	-0.06
P14272	Plasma kallikrein OS=Rattus norvegicus OX=10116 GN=Klkb1 PE=1 SV=1	7	0.756	1.142	0.861	0.903	0.888	1.614	0.993	0.977	1.058	0.851	-0.4	0.19	-0.22	-0.15	-0.17	0.69	-0.01	-0.03	0.08	-0.23
A0A0G2K648	WD repeat domain 61 OS=Rattus norvegicus OX=10116 GN=Skic8 PE=1 SV=2	8	0.949	0.96	0.888	1.018	1.006	0.89	1.027	0.968	1.014	0.999	-0.08	-0.06	-0.17	0.03	0.01	-0.17	0.04	-0.05	0.02	0
G3V940	Coronin OS=Rattus norvegicus OX=10116 GN=Coro1b PE=1 SV=1	8	1.098	1.084	0.926	1.028	1.096	0.842	1.066	1.054	1.102	0.87	0.13	0.12	-0.11	0.04	0.13	-0.25	0.09	0.08	0.14	-0.2
A0A8I6A098	Smoothelin OS=Rattus norvegicus OX=10116 GN=Smtn PE=1 SV=1	7	1.18	1.225	1.029	1.158	1.156	0.871	1.045	1.047	1.114	1.002	0.24	0.29	0.04	0.21	0.21	-0.2	0.06	0.07	0.16	0
A0A0G2JST3	Keratin, type II cytoskeletal 1 OS=Rattus norvegicus OX=10116 GN=Krt1 PE=1 SV=1	7	1.147	2.039	0.666	0.883	1.106	0.744	0.911	1.067	1.03	0.787	0.2	1.03	-0.59	-0.18	0.14	-0.43	-0.13	0.09	0.04	-0.35
A0A8I5ZN98	Alkylglycerone-phosphate synthase OS=Rattus norvegicus OX=10116 GN=Agps PE=1 SV=1	9	1.382	0.867	1.043	1.053	1.049	0.79	0.963	0.95	0.915	0.995	0.47	-0.21	0.06	0.08	0.07	-0.34	-0.05	-0.07	-0.13	-0.01
Q6PDV7	60S ribosomal protein L10 OS=Rattus norvegicus OX=10116 GN=Rpl10 PE=1 SV=3	6	0.819	0.889	1.06	0.909	1.01	0.784	1.042	0.95	1.023	1.15	-0.29	-0.17	0.08	-0.14	0.01	-0.35	0.06	-0.07	0.03	0.2
D4ADN6	Fibronectin type III and SPRY domain containing 2 OS=Rattus norvegicus OX=10116 GN=Fsd2 PE=4 SV=2	7	0.901	0.845	1.054	0.99	1.063	0.837	1.038	1.06	1.079	1.138	-0.15	-0.24	0.08	-0.01	0.09	-0.26	0.05	0.08	0.11	0.19
A0A8I5YBK9	Xin actin-binding repeat containing 1 OS=Rattus norvegicus OX=10116 GN=Xirp1 PE=3 SV=1	11	1.114	1.376	1.018	1.217	1.05	0.921	1.195	2.258	1.242	1.374	0.16	0.46	0.03	0.28	0.07	-0.12	0.26	1.18	0.31	0.46
A0A8I5Y868	Kinesin light chain OS=Rattus norvegicus OX=10116 GN=Klc2 PE=3 SV=1	7	1.073	1.066	1.026	1.109	1.118	0.966	1.07	1.121	1.23	1.136	0.1	0.09	0.04	0.15	0.16	-0.05	0.1	0.16	0.3	0.18
A0A1B0GWM0	Phosphatidylinositol 3,4,5-trisphosphate 5-phosphatase 2 OS=Rattus norvegicus OX=10116 GN=Inppl1 PE=1 SV=2	7	1.102	1.362	0.884	1.062	1.009	0.867	0.923	0.968	0.951	0.858	0.14	0.45	-0.18	0.09	0.01	-0.21	-0.12	-0.05	-0.07	-0.22
A0A8I5Y925	NEDD8-activating enzyme E1 catalytic subunit OS=Rattus norvegicus OX=10116 GN=Uba3 PE=1 SV=1	6	0.98	0.937	0.981	0.977	0.992	0.775	0.997	0.969	0.992	0.975	-0.03	-0.09	-0.03	-0.03	-0.01	-0.37	0	-0.05	-0.01	-0.04
D3ZLT6	Kelch-like family member 31 OS=Rattus norvegicus OX=10116 GN=Klhl31 PE=4 SV=1	9	0.805	0.994	0.808	0.953	0.96	1.226	0.86	0.92	0.929	0.798	-0.31	-0.01	-0.31	-0.07	-0.06	0.29	-0.22	-0.12	-0.11	-0.33
[truncated: 2,824 more rows]

## Sheet: PeptideGroups
Master Protein Accessions	Master Protein Descriptions	Modifications	Abundance Ratio: (126) / (131C)	Abundance Ratio: (127N) / (131C)	Abundance Ratio: (127C) / (131C)	Abundance Ratio: (128N) / (131C)	Abundance Ratio: (128C) / (131C)	Abundance Ratio: (129N) / (131C)	Abundance Ratio: (129C) / (131C)	Abundance Ratio: (130N) / (131C)	Abundance Ratio: (130C) / (131C)	Abundance Ratio: (131N) / (131C)	Abundance Ratio (log2): (126) / (131C)	Abundance Ratio (log2): (127N) / (131C)	Abundance Ratio (log2): (127C) / (131C)	Abundance Ratio (log2): (128N) / (131C)	Abundance Ratio (log2): (128C) / (131C)	Abundance Ratio (log2): (129N) / (131C)	Abundance Ratio (log2): (129C) / (131C)	Abundance Ratio (log2): (130N) / (131C)	Abundance Ratio (log2): (130C) / (131C)	Abundance Ratio (log2): (131N) / (131C)
[truncated: 35,785 more rows]
